# Supplementary material for: Effects of Experimental Terrestrialization on the Skin Mucus Proteome of African Lungfish (Protopterus dolloi)
Source: Front Immunol. 2018 Jun 4;9:1259. doi: 10.3389/fimmu.2018.01259 (PMC5994560; doi:10.3389/fimmu.2018.01259)
Supplement: Supplementary file 1 [file Table_5.XLSX]

## Sheet: Peptide TableReport_Illumina
Sequence Coverage	Protein	Accession	Bio Sample	Probability	% of total Spectrum	Unique Peptide Counts	Unique Spectrum Counts	Total Spectrum Counts	% of amino acids identified	m.w.
sp|ALBU_BOVIN| [sp|ALBU_BOVIN|]	sp|ALBU_BOVIN|	sp|ALBU_BOVIN|	IS_216438_Pdol9_C_Band	1	0.026238	48	81	293	0.7743	69 kDa
comp6361_c0::comp6361_c0_seq1::g.21589::m.21589 [type:internal len:392 gc:universal comp6361_c0_seq1:1-1173(+)]	type:internal len:392 gc:universal comp6361_c0_seq1:1-1173(+)	comp6361_c0::comp6361_c0_seq1::g.21589::m.21589	IS_216438_Pdol9_C_Band	1	0.00805946	31	53	90	0.664962	44 kDa
Unknown Protein Sequence Coverage	type:complete len:104 gc:universal comp587_c0_seq1:155-466(+)	comp587_c0::comp587_c0_seq1::g.1389::m.1389	IS_216438_Pdol9_C_Band	0.33	0	0	0	0	0	11 kDa
sp|K2C1_HUMAN| [sp|K2C1_HUMAN|]	sp|K2C1_HUMAN|	sp|K2C1_HUMAN|	IS_216438_Pdol9_C_Band	1	0.00510433	24	30	57	0.443235	66 kDa
sp|K1C9_HUMAN| [sp|K1C9_HUMAN|]	sp|K1C9_HUMAN|	sp|K1C9_HUMAN|	IS_216438_Pdol9_C_Band	1	0.00304469	18	26	34	0.446228	62 kDa
sp|K1C10_HUMAN| [sp|K1C10_HUMAN|]	sp|K1C10_HUMAN|	sp|K1C10_HUMAN|	IS_216438_Pdol9_C_Band	1	0.00134324	13	13	15	0.27656	60 kDa
sp|TRYP_PIG| [sp|TRYP_PIG|]	sp|TRYP_PIG|	sp|TRYP_PIG|	IS_216438_Pdol9_C_Band	1	0.000179099	2	2	2	0.0779221	24 kDa
sp|K22E_HUMAN| [sp|K22E_HUMAN|]	sp|K22E_HUMAN|	sp|K22E_HUMAN|	IS_216438_Pdol9_C_Band	1	0.00125369	8	8	14	0.20155	66 kDa
comp26641_c0::comp26641_c0_seq1::g.19133::m.19133 [type:complete len:445 gc:universal comp26641_c0_seq1:140-1474(+)]	type:complete len:445 gc:universal comp26641_c0_seq1:140-1474(+)	comp26641_c0::comp26641_c0_seq1::g.19133::m.19133	IS_216438_Pdol9_C_Band	1	0.00197009	15	18	22	0.331081	50 kDa
comp12812_c0::comp12812_c0_seq1::g.37749::m.37749 [type:3prime_partial len:617 gc:universal comp12812_c0_seq1:141-1988(+)]	type:3prime_partial len:617 gc:universal comp12812_c0_seq1:141-1988(+)	comp12812_c0::comp12812_c0_seq1::g.37749::m.37749	IS_216438_Pdol9_C_Band	1	0.00125369	10	12	14	0.202922	71 kDa
comp1405_c0::comp1405_c0_seq1::g.415::m.415 [type:complete len:857 gc:universal comp1405_c0_seq1:239-2809(+)]	type:complete len:857 gc:universal comp1405_c0_seq1:239-2809(+)	comp1405_c0::comp1405_c0_seq1::g.415::m.415	IS_216438_Pdol9_C_Band	1	0.000447748	4	4	5	0.0665888	96 kDa
comp2098_c0::comp2098_c0_seq1::g.8084::m.8084 [type:complete len:521 gc:universal comp2098_c0_seq1:306-1868(+)]	type:complete len:521 gc:universal comp2098_c0_seq1:306-1868(+)	comp2098_c0::comp2098_c0_seq1::g.8084::m.8084	IS_216438_Pdol9_C_Band	1	0.00286559	18	23	32	0.430769	56 kDa
comp52682_c0::comp52682_c0_seq1::g.35719::m.35719 [type:complete len:467 gc:universal comp52682_c0_seq1:211-1611(+)]	type:complete len:467 gc:universal comp52682_c0_seq1:211-1611(+)	comp52682_c0::comp52682_c0_seq1::g.35719::m.35719	IS_216438_Pdol9_C_Band	1	0.00295514	16	27	33	0.362661	52 kDa
Unknown Protein Sequence Coverage	type:complete len:335 gc:universal comp40_c0_seq1:265-1269(+)	comp40_c0::comp40_c0_seq1::g.1253::m.1253	IS_216438_Pdol9_C_Band	0.66	0	0	0	0	0	36 kDa
comp3263_c0::comp3263_c0_seq1::g.8976::m.8976 [type:complete len:726 gc:universal comp3263_c0_seq1:106-2283(+)]	type:complete len:726 gc:universal comp3263_c0_seq1:106-2283(+)	comp3263_c0::comp3263_c0_seq1::g.8976::m.8976	IS_216438_Pdol9_C_Band	1	0.000447748	5	5	5	0.121379	80 kDa
comp228091_c0::comp228091_c0_seq1::g.23893::m.23893 [type:3prime_partial len:328 gc:universal comp228091_c0_seq1:127-1107(+)]	type:3prime_partial len:328 gc:universal comp228091_c0_seq1:127-1107(+)	comp228091_c0::comp228091_c0_seq1::g.23893::m.23893	IS_216438_Pdol9_C_Band	1	0.000537297	6	6	6	0.24159	37 kDa
comp147_c0::comp147_c0_seq1::g.488::m.488 [type:complete len:436 gc:universal comp147_c0_seq1:226-1533(+)]	type:complete len:436 gc:universal comp147_c0_seq1:226-1533(+)	comp147_c0::comp147_c0_seq1::g.488::m.488	IS_216438_Pdol9_C_Band	1	0.000537297	4	4	6	0.174713	47 kDa
comp916_c0::comp916_c0_seq1::g.1632::m.1632 [type:complete len:338 gc:universal comp916_c0_seq1:378-1391(+)]	type:complete len:338 gc:universal comp916_c0_seq1:378-1391(+)	comp916_c0::comp916_c0_seq1::g.1632::m.1632	IS_216438_Pdol9_C_Band	1	0.000626847	7	7	7	0.264095	38 kDa
comp280_c0::comp280_c0_seq1::g.1152::m.1152 [type:complete len:522 gc:universal comp280_c0_seq1:92-1657(+)]	type:complete len:522 gc:universal comp280_c0_seq1:92-1657(+)	comp280_c0::comp280_c0_seq1::g.1152::m.1152	IS_216438_Pdol9_C_Band	1	0.000268649	3	3	3	0.0806142	56 kDa
comp27171_c0::comp27171_c0_seq1::g.19346::m.19346 [type:complete len:2752 gc:universal comp27171_c0_seq1:83-8338(+)]	type:complete len:2752 gc:universal comp27171_c0_seq1:83-8338(+)	comp27171_c0::comp27171_c0_seq1::g.19346::m.19346	IS_216438_Pdol9_C_Band	0.98	8.95496e-05	1	1	1	0.00617957	316 kDa
comp253_c0::comp253_c0_seq1::g.1133::m.1133 [type:complete len:154 gc:universal comp253_c0_seq1:134-595(+)]	type:complete len:154 gc:universal comp253_c0_seq1:134-595(+)	comp253_c0::comp253_c0_seq1::g.1133::m.1133	IS_216438_Pdol9_C_Band	1	8.95496e-05	1	1	1	0.0915033	17 kDa
comp397_c0::comp397_c0_seq1::g.1239::m.1239 [type:complete len:507 gc:universal comp397_c0_seq1:198-1718(+)]	type:complete len:507 gc:universal comp397_c0_seq1:198-1718(+)	comp397_c0::comp397_c0_seq1::g.1239::m.1239	IS_216438_Pdol9_C_Band	1	0.00116414	10	12	13	0.219368	57 kDa
comp3208_c0::comp3208_c0_seq1::g.8955::m.8955 [type:complete len:124 gc:universal comp3208_c0_seq1:203-574(+)]	type:complete len:121 gc:universal comp54263_c0_seq1:58-420(+)	comp54263_c0::comp54263_c0_seq1::g.40471::m.40471	IS_216438_Pdol9_C_Band	0.99	8.95496e-05	1	1	1	0.0916667	14 kDa
comp489_c0::comp489_c0_seq1::g.1299::m.1299 [type:complete len:498 gc:universal comp489_c0_seq1:360-1853(+)]	type:complete len:498 gc:universal comp489_c0_seq1:360-1853(+)	comp489_c0::comp489_c0_seq1::g.1299::m.1299	IS_216438_Pdol9_C_Band	1	0.00107459	8	9	12	0.251509	56 kDa
comp177_c0::comp177_c0_seq1::g.799::m.799 [type:complete len:148 gc:universal comp177_c0_seq1:125-568(+)]	type:complete len:148 gc:universal comp177_c0_seq1:125-568(+)	comp177_c0::comp177_c0_seq1::g.799::m.799	IS_216438_Pdol9_C_Band	1	0.000805946	7	8	9	0.585034	16 kDa
comp600_c0::comp600_c0_seq1::g.1403::m.1403 [type:complete len:556 gc:universal comp600_c0_seq1:212-1879(+)]	type:complete len:556 gc:universal comp600_c0_seq1:212-1879(+)	comp600_c0::comp600_c0_seq1::g.1403::m.1403	IS_216438_Pdol9_C_Band	1	0.00188054	12	16	21	0.259459	62 kDa
comp8759_c0::comp8759_c0_seq1::g.27374::m.27374 [type:3prime_partial len:600 gc:universal comp8759_c0_seq1:181-1977(+)]	type:3prime_partial len:600 gc:universal comp8759_c0_seq1:181-1977(+)	comp8759_c0::comp8759_c0_seq1::g.27374::m.27374	IS_216438_Pdol9_C_Band	1	0.000626847	4	5	7	0.100167	66 kDa
Unknown Protein Sequence Coverage	type:5prime_partial len:271 gc:universal comp242487_c0_seq1:2-814(+)	comp242487_c0::comp242487_c0_seq1::g.7396::m.7396	IS_216438_Pdol9_C_Band	0.94	0	0	0	0	0	29 kDa
comp51145_c0::comp51145_c0_seq1::g.30433::m.30433 [type:complete len:699 gc:universal comp51145_c0_seq1:37-2133(+)]	type:complete len:699 gc:universal comp51145_c0_seq1:37-2133(+)	comp51145_c0::comp51145_c0_seq1::g.30433::m.30433	IS_216438_Pdol9_C_Band	0.91	8.95496e-05	1	1	1	0.02149	79 kDa
comp1539_c0::comp1539_c0_seq1::g.570::m.570 [type:complete len:338 gc:universal comp1539_c0_seq1:164-1177(+)]	type:complete len:338 gc:universal comp1539_c0_seq1:164-1177(+)	comp1539_c0::comp1539_c0_seq1::g.570::m.570	IS_216438_Pdol9_C_Band	1	0.000179099	2	2	2	0.074184	38 kDa
comp96022_c0::comp96022_c0_seq3::g.46487::m.46487 [type:3prime_partial len:271 gc:universal comp96022_c0_seq3:89-898(+)]	type:3prime_partial len:271 gc:universal comp96022_c0_seq3:89-898(+)	comp96022_c0::comp96022_c0_seq3::g.46487::m.46487	IS_216438_Pdol9_C_Band	1	0.000358198	2	3	4	0.111111	30 kDa
comp523_c0::comp523_c0_seq1::g.1347::m.1347 [type:complete len:365 gc:universal comp523_c0_seq1:159-1253(+)]	type:complete len:365 gc:universal comp523_c0_seq1:159-1253(+)	comp523_c0::comp523_c0_seq1::g.1347::m.1347	IS_216438_Pdol9_C_Band	1	8.95496e-05	1	1	1	0.032967	40 kDa
comp950_c0::comp950_c0_seq1::g.1673::m.1673 [type:complete len:250 gc:universal comp950_c0_seq1:210-959(+)]	type:complete len:250 gc:universal comp950_c0_seq1:210-959(+)	comp950_c0::comp950_c0_seq1::g.1673::m.1673	IS_216438_Pdol9_C_Band	1	0.000447748	3	3	5	0.2249	28 kDa
comp258_c0::comp258_c0_seq2::g.1139::m.1139 [type:complete len:392 gc:universal comp258_c0_seq2:110-1285(+)]	type:complete len:392 gc:universal comp258_c0_seq2:110-1285(+)	comp258_c0::comp258_c0_seq2::g.1139::m.1139	IS_216438_Pdol9_C_Band	1	0.000447748	5	5	5	0.194373	43 kDa
comp550_c0::comp550_c0_seq1::g.1366::m.1366 [type:complete len:165 gc:universal comp550_c0_seq1:484-978(+)]	type:complete len:165 gc:universal comp550_c0_seq1:484-978(+)	comp550_c0::comp550_c0_seq1::g.1366::m.1366	IS_216438_Pdol9_C_Band	1	0.000268649	2	2	3	0.189024	19 kDa
comp2601_c0::comp2601_c0_seq1::g.8515::m.8515 [type:complete len:615 gc:universal comp2601_c0_seq1:109-1953(+)]	type:complete len:615 gc:universal comp2601_c0_seq1:109-1953(+)	comp2601_c0::comp2601_c0_seq1::g.8515::m.8515	IS_216438_Pdol9_C_Band	1	0.00170144	15	16	19	0.34202	69 kDa
comp1823_c0::comp1823_c0_seq1::g.867::m.867 [type:complete len:106 gc:universal comp1823_c0_seq1:257-574(+)]	type:complete len:106 gc:universal comp1823_c0_seq1:257-574(+)	comp1823_c0::comp1823_c0_seq1::g.867::m.867	IS_216438_Pdol9_C_Band	1	0.000179099	2	2	2	0.180952	12 kDa
comp275050_c0::comp275050_c0_seq1::g.38953::m.38953 [type:5prime_partial len:187 gc:universal comp275050_c0_seq1:2-562(+)]	type:5prime_partial len:187 gc:universal comp275050_c0_seq1:2-562(+)	comp275050_c0::comp275050_c0_seq1::g.38953::m.38953	IS_216438_Pdol9_C_Band	1	0.00143279	8	10	16	0.5	21 kDa
comp131_c0::comp131_c0_seq1::g.336::m.336 [type:complete len:706 gc:universal comp131_c0_seq1:230-2347(+)]	type:complete len:706 gc:universal comp131_c0_seq1:230-2347(+)	comp131_c0::comp131_c0_seq1::g.336::m.336	IS_216438_Pdol9_C_Band	1	0.000179099	2	2	2	0.0397163	78 kDa
comp370_c0::comp370_c0_seq1::g.1212::m.1212 [type:complete len:554 gc:universal comp370_c0_seq1:355-2016(+)]	type:complete len:554 gc:universal comp370_c0_seq1:355-2016(+)	comp370_c0::comp370_c0_seq1::g.1212::m.1212	IS_216438_Pdol9_C_Band	1	0.000716397	8	8	8	0.175407	60 kDa
comp1598_c0::comp1598_c0_seq1::g.617::m.617 [type:complete len:574 gc:universal comp1598_c0_seq1:178-1899(+)]	type:complete len:574 gc:universal comp1598_c0_seq1:178-1899(+)	comp1598_c0::comp1598_c0_seq1::g.617::m.617	IS_216438_Pdol9_C_Band	1	0.000358198	4	4	4	0.0890052	61 kDa
comp1465_c0::comp1465_c0_seq1::g.471::m.471 [type:complete len:322 gc:universal comp1465_c0_seq1:218-1183(+)]	type:complete len:322 gc:universal comp1465_c0_seq1:218-1183(+)	comp1465_c0::comp1465_c0_seq1::g.471::m.471	IS_216438_Pdol9_C_Band	1	0.000179099	2	2	2	0.0841121	36 kDa
comp83387_c0::comp83387_c0_seq1::g.11440::m.11440 [type:complete len:897 gc:universal comp83387_c0_seq1:163-2853(+)]	type:5prime_partial len:658 gc:universal comp13486_c0_seq1:2-1975(+)	comp13486_c0::comp13486_c0_seq1::g.38040::m.38040	IS_216438_Pdol9_C_Band	0.95	0.000179099	0	0	2	0.0410959	76 kDa
comp5111_c0::comp5111_c0_seq1::g.15908::m.15908 [type:complete len:327 gc:universal comp5111_c0_seq1:234-1214(+)]	type:complete len:327 gc:universal comp5111_c0_seq1:234-1214(+)	comp5111_c0::comp5111_c0_seq1::g.15908::m.15908	IS_216438_Pdol9_C_Band	1	0.000268649	2	2	3	0.0828221	36 kDa
Unknown Protein Sequence Coverage	type:complete len:163 gc:universal comp1390_c0_seq1:421-909(+)	comp1390_c0::comp1390_c0_seq1::g.392::m.392	IS_216438_Pdol9_C_Band	0.33	0	0	0	0	0	17 kDa
comp187_c0::comp187_c0_seq1::g.921::m.921 [type:complete len:257 gc:universal comp187_c0_seq1:165-935(+)]	type:complete len:257 gc:universal comp187_c0_seq1:165-935(+)	comp187_c0::comp187_c0_seq1::g.921::m.921	IS_216438_Pdol9_C_Band	0.99	8.95496e-05	1	1	1	0.0585938	29 kDa
comp94650_c0::comp94650_c0_seq1::g.41682::m.41682 [type:5prime_partial len:377 gc:universal comp94650_c0_seq1:2-1132(+)]	type:5prime_partial len:377 gc:universal comp94650_c0_seq1:2-1132(+)	comp94650_c0::comp94650_c0_seq1::g.41682::m.41682	IS_216438_Pdol9_C_Band	1	0.000358198	3	4	4	0.117021	41 kDa
comp2038_c0::comp2038_c0_seq1::g.8039::m.8039 [type:complete len:490 gc:universal comp2038_c0_seq1:112-1581(+)]	type:complete len:490 gc:universal comp2038_c0_seq1:112-1581(+)	comp2038_c0::comp2038_c0_seq1::g.8039::m.8039	IS_216438_Pdol9_C_Band	1	0.000268649	2	2	3	0.0593047	55 kDa
comp24_c0::comp24_c0_seq1::g.1063::m.1063 [type:complete len:377 gc:universal comp24_c0_seq1:357-1487(+)]	type:complete len:377 gc:universal comp24_c0_seq5:165-1295(+)	comp24_c0::comp24_c0_seq5::g.1075::m.1075	IS_216438_Pdol9_C_Band	1	0.00161189	1	2	18	0.380319	42 kDa
comp2610_c0::comp2610_c0_seq1::g.8520::m.8520 [type:complete len:418 gc:universal comp2610_c0_seq1:210-1463(+)]	type:complete len:418 gc:universal comp2610_c0_seq1:210-1463(+)	comp2610_c0::comp2610_c0_seq1::g.8520::m.8520	IS_216438_Pdol9_C_Band	1	0.000358198	3	3	4	0.1247	45 kDa
comp142_c0::comp142_c0_seq1::g.427::m.427 [type:complete len:465 gc:universal comp142_c0_seq1:231-1625(+)]	type:complete len:465 gc:universal comp142_c0_seq1:231-1625(+)	comp142_c0::comp142_c0_seq1::g.427::m.427	IS_216438_Pdol9_C_Band	1	0.000179099	1	1	2	0.049569	54 kDa
comp985_c0::comp985_c0_seq1::g.1719::m.1719 [type:complete len:252 gc:universal comp985_c0_seq1:183-938(+)]	type:complete len:252 gc:universal comp985_c0_seq1:183-938(+)	comp985_c0::comp985_c0_seq1::g.1719::m.1719	IS_216438_Pdol9_C_Band	1	0.000447748	3	3	5	0.187251	28 kDa
comp439_c0::comp439_c0_seq1::g.1271::m.1271 [type:complete len:177 gc:universal comp439_c0_seq1:301-831(+)]	type:complete len:177 gc:universal comp439_c0_seq1:301-831(+)	comp439_c0::comp439_c0_seq1::g.1271::m.1271	IS_216438_Pdol9_C_Band	1	8.95496e-05	1	1	1	0.0568182	20 kDa
comp1341_c0::comp1341_c0_seq1::g.346::m.346 [type:complete len:458 gc:universal comp1341_c0_seq1:107-1480(+)]	type:complete len:458 gc:universal comp1341_c0_seq1:107-1480(+)	comp1341_c0::comp1341_c0_seq1::g.346::m.346	IS_216438_Pdol9_C_Band	1	0.00107459	5	6	12	0.133479	50 kDa
comp107_c0::comp107_c0_seq1::g.54::m.54 [type:complete len:143 gc:universal comp107_c0_seq1:137-565(+)]	type:complete len:143 gc:universal comp107_c0_seq1:137-565(+)	comp107_c0::comp107_c0_seq1::g.54::m.54	IS_216438_Pdol9_C_Band	1	8.95496e-05	1	1	1	0.105634	16 kDa
comp251_c0::comp251_c0_seq1::g.1130::m.1130 [type:complete len:369 gc:universal comp251_c0_seq1:312-1418(+)]	type:complete len:369 gc:universal comp251_c0_seq1:312-1418(+)	comp251_c0::comp251_c0_seq1::g.1130::m.1130	IS_216438_Pdol9_C_Band	0.99	8.95496e-05	1	1	1	0.0353261	40 kDa
sp|K1C15_SHEEP| [sp|K1C15_SHEEP|]	sp|K1C15_SHEEP|	sp|K1C15_SHEEP|	IS_216438_Pdol9_C_Band	1	0.000447748	2	3	5	0.0463576	49 kDa
comp3934_c0::comp3934_c0_seq1::g.9456::m.9456 [type:complete len:472 gc:universal comp3934_c0_seq1:85-1500(+)]	type:complete len:472 gc:universal comp3934_c0_seq1:85-1500(+)	comp3934_c0::comp3934_c0_seq1::g.9456::m.9456	IS_216438_Pdol9_C_Band	1	0.000537297	6	6	6	0.197452	51 kDa
comp5334_c0::comp5334_c0_seq1::g.16122::m.16122 [type:complete len:353 gc:universal comp5334_c0_seq1:113-1171(+)]	type:complete len:353 gc:universal comp5334_c0_seq1:113-1171(+)	comp5334_c0::comp5334_c0_seq1::g.16122::m.16122	IS_216438_Pdol9_C_Band	0.99	8.95496e-05	1	1	1	0.0454545	40 kDa
comp919_c0::comp919_c0_seq1::g.1634::m.1634 [type:complete len:338 gc:universal comp919_c0_seq1:164-1177(+)]	type:complete len:338 gc:universal comp919_c0_seq1:164-1177(+)	comp919_c0::comp919_c0_seq1::g.1634::m.1634	IS_216438_Pdol9_C_Band	1	8.95496e-05	1	1	1	0.0445104	38 kDa
comp1773_c0::comp1773_c0_seq1::g.780::m.780 [type:complete len:337 gc:universal comp1773_c0_seq1:92-1102(+)]	type:complete len:337 gc:universal comp1773_c0_seq1:92-1102(+)	comp1773_c0::comp1773_c0_seq1::g.780::m.780	IS_216438_Pdol9_C_Band	0.99	8.95496e-05	1	1	1	0.0357143	37 kDa
comp978_c0::comp978_c0_seq2::g.1716::m.1716 [type:complete len:106 gc:universal comp978_c0_seq2:354-671(+)]	type:complete len:106 gc:universal comp978_c0_seq2:354-671(+)	comp978_c0::comp978_c0_seq2::g.1716::m.1716	IS_216438_Pdol9_C_Band	1	0.000179099	2	2	2	0.190476	12 kDa
comp96022_c0::comp96022_c0_seq1::g.46485::m.46485 [type:5prime_partial len:439 gc:universal comp96022_c0_seq1:3-1319(+)]	type:5prime_partial len:439 gc:universal comp96022_c0_seq1:3-1319(+)	comp96022_c0::comp96022_c0_seq1::g.46485::m.46485	IS_216438_Pdol9_C_Band	1	0.000537297	3	5	6	0.0958904	50 kDa
comp177148_c0::comp177148_c0_seq1::g.47315::m.47315 [type:5prime_partial len:204 gc:universal comp177148_c0_seq1:1-612(+)]	type:5prime_partial len:204 gc:universal comp177148_c0_seq1:1-612(+)	comp177148_c0::comp177148_c0_seq1::g.47315::m.47315	IS_216438_Pdol9_C_Band	1	0.000447748	2	2	5	0.118227	23 kDa
comp1491_c0::comp1491_c0_seq1::g.500::m.500 [type:complete len:883 gc:universal comp1491_c0_seq1:696-3344(+)]	type:complete len:883 gc:universal comp1491_c0_seq1:696-3344(+)	comp1491_c0::comp1491_c0_seq1::g.500::m.500	IS_216438_Pdol9_C_Band	1	0.000268649	3	3	3	0.0544218	99 kDa
comp6147_c0::comp6147_c0_seq1::g.21487::m.21487 [type:complete len:325 gc:universal comp6147_c0_seq1:169-1143(+)]	type:complete len:325 gc:universal comp6147_c0_seq1:169-1143(+)	comp6147_c0::comp6147_c0_seq1::g.21487::m.21487	IS_216438_Pdol9_C_Band	0.99	0.000179099	1	1	2	0.0493827	36 kDa
comp22598_c0::comp22598_c0_seq1::g.6858::m.6858 [type:complete len:300 gc:universal comp22598_c0_seq1:290-1189(+)]	type:complete len:300 gc:universal comp22598_c0_seq1:290-1189(+)	comp22598_c0::comp22598_c0_seq1::g.6858::m.6858	IS_216438_Pdol9_C_Band	1	0.000447748	4	5	5	0.16388	33 kDa
comp61_c0::comp61_c0_seq1::g.1422::m.1422 [type:complete len:506 gc:universal comp61_c0_seq1:100-1617(+)]	type:complete len:506 gc:universal comp61_c0_seq1:100-1617(+)	comp61_c0::comp61_c0_seq1::g.1422::m.1422	IS_216438_Pdol9_C_Band	1	0.000179099	2	2	2	0.0514851	57 kDa
comp116_c0::comp116_c0_seq1::g.143::m.143 [type:complete len:165 gc:universal comp116_c0_seq1:145-639(+)]	type:complete len:165 gc:universal comp116_c0_seq1:145-639(+)	comp116_c0::comp116_c0_seq1::g.143::m.143	IS_216438_Pdol9_C_Band	1	0.000179099	2	2	2	0.134146	18 kDa
comp2404_c0::comp2404_c0_seq1::g.8388::m.8388 [type:complete len:228 gc:universal comp2404_c0_seq1:206-889(+)]	type:complete len:228 gc:universal comp2404_c0_seq1:206-889(+)	comp2404_c0::comp2404_c0_seq1::g.8388::m.8388	IS_216438_Pdol9_C_Band	1	0.000268649	3	3	3	0.136564	26 kDa
comp3940_c0::comp3940_c0_seq1::g.9460::m.9460 [type:complete len:608 gc:universal comp3940_c0_seq1:248-2071(+)]	type:complete len:608 gc:universal comp3940_c0_seq1:248-2071(+)	comp3940_c0::comp3940_c0_seq1::g.9460::m.9460	IS_216438_Pdol9_C_Band	0.95	8.95496e-05	1	1	1	0.0131796	66 kDa
Unknown Protein Sequence Coverage	type:5prime_partial len:450 gc:universal comp34405_c0_seq1:1-1350(+)	comp34405_c0::comp34405_c0_seq1::g.39403::m.39403	IS_216438_Pdol9_C_Band	0.87	0	0	0	0	0	51 kDa
comp621_c0::comp621_c0_seq1::g.1424::m.1424 [type:complete len:245 gc:universal comp621_c0_seq1:143-877(+)]	type:complete len:245 gc:universal comp621_c0_seq1:143-877(+)	comp621_c0::comp621_c0_seq1::g.1424::m.1424	IS_216438_Pdol9_C_Band	1	0.000358198	1	1	4	0.0983607	28 kDa
comp215_c0::comp215_c0_seq1::g.1035::m.1035 [type:complete len:647 gc:universal comp215_c0_seq1:166-2106(+)]	type:complete len:647 gc:universal comp215_c0_seq1:166-2106(+)	comp215_c0::comp215_c0_seq1::g.1035::m.1035	IS_216438_Pdol9_C_Band	0.96	0.000268649	0	0	3	0.0572755	71 kDa
comp14_c0::comp14_c0_seq1::g.506::m.506 [type:complete len:131 gc:universal comp14_c0_seq1:175-567(+)]	type:complete len:156 gc:universal comp17_c0_seq1:162-629(+)	comp17_c0::comp17_c0_seq1::g.844::m.844	IS_216438_Pdol9_C_Band	1	0.000179099	1	1	2	0.16129	16 kDa
comp2750_c0::comp2750_c0_seq1::g.8681::m.8681 [type:complete len:638 gc:universal comp2750_c0_seq1:109-2022(+)]	type:complete len:638 gc:universal comp2750_c0_seq1:109-2022(+)	comp2750_c0::comp2750_c0_seq1::g.8681::m.8681	IS_216438_Pdol9_C_Band	1	0.000358198	3	3	4	0.0816327	70 kDa
comp1385_c0::comp1385_c0_seq1::g.388::m.388 [type:complete len:486 gc:universal comp1385_c0_seq1:142-1599(+)]	type:complete len:486 gc:universal comp1385_c0_seq1:142-1599(+)	comp1385_c0::comp1385_c0_seq1::g.388::m.388	IS_216438_Pdol9_C_Band	1	0.000716397	4	6	8	0.127835	51 kDa
comp883_c0::comp883_c0_seq1::g.1605::m.1605 [type:3prime_partial len:364 gc:universal comp883_c0_seq1:175-1263(+)]	type:3prime_partial len:364 gc:universal comp883_c0_seq1:175-1263(+)	comp883_c0::comp883_c0_seq1::g.1605::m.1605	IS_216438_Pdol9_C_Band	1	0.00134324	9	11	15	0.37741	41 kDa
comp8077_c0::comp8077_c0_seq1::g.26861::m.26861 [type:complete len:535 gc:universal comp8077_c0_seq1:360-1964(+)]	type:complete len:535 gc:universal comp8077_c0_seq1:360-1964(+)	comp8077_c0::comp8077_c0_seq1::g.26861::m.26861	IS_216438_Pdol9_C_Band	1	0.000268649	3	3	3	0.0730337	60 kDa
comp895_c0::comp895_c0_seq1::g.1616::m.1616 [type:complete len:441 gc:universal comp895_c0_seq1:516-1838(+)]	type:complete len:441 gc:universal comp895_c0_seq1:516-1838(+)	comp895_c0::comp895_c0_seq1::g.1616::m.1616	IS_216438_Pdol9_C_Band	1	0.000537297	3	5	6	0.0931818	50 kDa
comp191_c0::comp191_c0_seq1::g.963::m.963 [type:complete len:324 gc:universal comp191_c0_seq1:106-1077(+)]	type:complete len:324 gc:universal comp191_c0_seq1:106-1077(+)	comp191_c0::comp191_c0_seq1::g.963::m.963	IS_216438_Pdol9_C_Band	1	0.000179099	1	1	2	0.0681115	36 kDa
comp74132_c0::comp74132_c0_seq1::g.41211::m.41211 [type:complete len:333 gc:universal comp74132_c0_seq1:189-1187(+)]	type:complete len:333 gc:universal comp74132_c0_seq1:189-1187(+)	comp74132_c0::comp74132_c0_seq1::g.41211::m.41211	IS_216438_Pdol9_C_Band	1	0.000358198	3	4	4	0.105422	36 kDa
comp1356_c0::comp1356_c0_seq1::g.354::m.354 [type:complete len:429 gc:universal comp1356_c0_seq1:125-1411(+)]	type:complete len:429 gc:universal comp1356_c0_seq1:125-1411(+)	comp1356_c0::comp1356_c0_seq1::g.354::m.354	IS_216438_Pdol9_C_Band	0.99	0.000179099	1	1	2	0.0303738	47 kDa
Unknown Protein Sequence Coverage	type:complete len:378 gc:universal comp1455_c0_seq1:318-1451(+)	comp1455_c0::comp1455_c0_seq1::g.459::m.459	IS_216438_Pdol9_C_Band	0.5	0	0	0	0	0	39 kDa
comp1394_c0::comp1394_c0_seq1::g.398::m.398 [type:complete len:502 gc:universal comp1394_c0_seq1:425-1930(+)]	type:complete len:502 gc:universal comp1394_c0_seq1:425-1930(+)	comp1394_c0::comp1394_c0_seq1::g.398::m.398	IS_216438_Pdol9_C_Band	1	0.000179099	2	2	2	0.0618763	53 kDa
comp699_c0::comp699_c0_seq1::g.1471::m.1471 [type:complete len:143 gc:universal comp699_c0_seq1:241-669(+)]	type:complete len:143 gc:universal comp699_c0_seq1:241-669(+)	comp699_c0::comp699_c0_seq1::g.1471::m.1471	IS_216438_Pdol9_C_Band	0.99	8.95496e-05	1	1	1	0.112676	16 kDa
sp|PRDX1_HUMAN| [sp|PRDX1_HUMAN|]	type:complete len:199 gc:universal comp254_c0_seq1:81-677(+)	comp254_c0::comp254_c0_seq1::g.1135::m.1135	IS_216438_Pdol9_C_Band	1	0.000268649	3	3	3	0.186869	22 kDa
comp9331_c0::comp9331_c0_seq1::g.27682::m.27682 [type:3prime_partial len:392 gc:universal comp9331_c0_seq1:147-1319(+)]	type:3prime_partial len:392 gc:universal comp9331_c0_seq1:147-1319(+)	comp9331_c0::comp9331_c0_seq1::g.27682::m.27682	IS_216438_Pdol9_C_Band	1	0.000985045	6	7	11	0.255754	46 kDa
comp12749_c0::comp12749_c0_seq1::g.37702::m.37702 [type:5prime_partial len:846 gc:universal comp12749_c0_seq1:1-2538(+)]	type:5prime_partial len:846 gc:universal comp12749_c0_seq1:1-2538(+)	comp12749_c0::comp12749_c0_seq1::g.37702::m.37702	IS_216438_Pdol9_C_Band	1	8.95496e-05	1	1	1	0.0153846	87 kDa
comp74_c0::comp74_c0_seq1::g.1503::m.1503 [type:complete len:489 gc:universal comp74_c0_seq1:356-1822(+)]	type:complete len:489 gc:universal comp74_c0_seq1:356-1822(+)	comp74_c0::comp74_c0_seq1::g.1503::m.1503	IS_216438_Pdol9_C_Band	1	0.000895496	7	8	10	0.168033	56 kDa
comp15299_c0::comp15299_c0_seq1::g.43113::m.43113 [type:complete len:459 gc:universal comp15299_c0_seq1:132-1508(+)]	type:complete len:459 gc:universal comp15299_c0_seq1:132-1508(+)	comp15299_c0::comp15299_c0_seq1::g.43113::m.43113	IS_216438_Pdol9_C_Band	1	0.000805946	8	8	9	0.242358	51 kDa
comp1393_c0::comp1393_c0_seq1::g.396::m.396 [type:internal len:439 gc:universal comp1393_c0_seq1:1-1314(+)]	type:internal len:439 gc:universal comp1393_c0_seq1:1-1314(+)	comp1393_c0::comp1393_c0_seq1::g.396::m.396	IS_216438_Pdol9_C_Band	1	0.000985045	9	9	11	0.253425	51 kDa
comp3339_c0::comp3339_c0_seq1::g.9060::m.9060 [type:complete len:231 gc:universal comp3339_c0_seq1:313-1005(+)]	type:complete len:231 gc:universal comp3339_c0_seq1:313-1005(+)	comp3339_c0::comp3339_c0_seq1::g.9060::m.9060	IS_216438_Pdol9_C_Band	1	0.000179099	2	2	2	0.143478	26 kDa
comp197344_c0::comp197344_c0_seq1::g.48378::m.48378 [type:internal len:144 gc:universal comp197344_c0_seq1:3-431(+)]	type:internal len:144 gc:universal comp197344_c0_seq1:3-431(+)	comp197344_c0::comp197344_c0_seq1::g.48378::m.48378	IS_216438_Pdol9_C_Band	1	0.000179099	2	2	2	0.188811	16 kDa
comp89236_c0::comp89236_c0_seq1::g.26702::m.26702 [type:complete len:374 gc:universal comp89236_c0_seq1:25-1146(+)]	type:complete len:374 gc:universal comp89236_c0_seq1:25-1146(+)	comp89236_c0::comp89236_c0_seq1::g.26702::m.26702	IS_216438_Pdol9_C_Band	1	0.000179099	2	2	2	0.077748	42 kDa
comp59360_c0::comp59360_c0_seq1::g.50724::m.50724 [type:3prime_partial len:147 gc:universal comp59360_c0_seq1:134-571(+)]	type:3prime_partial len:147 gc:universal comp59360_c0_seq1:134-571(+)	comp59360_c0::comp59360_c0_seq1::g.50724::m.50724	IS_216438_Pdol9_C_Band	0.99	8.95496e-05	1	1	1	0.0890411	16 kDa
comp8300_c0::comp8300_c0_seq1::g.27068::m.27068 [type:5prime_partial len:580 gc:universal comp8300_c0_seq1:2-1741(+)]	type:complete len:580 gc:universal comp7312_c0_seq1:322-2061(+)	comp7312_c0::comp7312_c0_seq1::g.22067::m.22067	IS_216438_Pdol9_C_Band	0.65	8.95496e-05	0	0	1	0.015544	68 kDa
comp371_c0::comp371_c0_seq1::g.1214::m.1214 [type:complete len:148 gc:universal comp371_c0_seq1:150-593(+)]	type:complete len:148 gc:universal comp371_c0_seq1:150-593(+)	comp371_c0::comp371_c0_seq1::g.1214::m.1214	IS_216438_Pdol9_C_Band	1	8.95496e-05	1	1	1	0.0748299	16 kDa
comp129_c0::comp129_c0_seq1::g.317::m.317 [type:complete len:452 gc:universal comp129_c0_seq1:244-1599(+)]	type:complete len:452 gc:universal comp129_c0_seq3:244-1599(+)	comp129_c0::comp129_c0_seq3::g.319::m.319	IS_216438_Pdol9_C_Band	1	0.000626847	3	3	7	0.166297	50 kDa
comp325_c0::comp325_c0_seq1::g.1179::m.1179 [type:3prime_partial len:272 gc:universal comp325_c0_seq1:118-930(+)]	type:3prime_partial len:272 gc:universal comp325_c0_seq1:118-930(+)	comp325_c0::comp325_c0_seq1::g.1179::m.1179	IS_216438_Pdol9_C_Band	1	0.000716397	6	7	8	0.302583	29 kDa
comp1134_c0::comp1134_c0_seq1::g.97::m.97 [type:complete len:187 gc:universal comp1134_c0_seq1:120-680(+)]	type:complete len:187 gc:universal comp1134_c0_seq1:120-680(+)	comp1134_c0::comp1134_c0_seq1::g.97::m.97	IS_216438_Pdol9_C_Band	0.99	8.95496e-05	1	1	1	0.0698925	21 kDa
comp1922_c0::comp1922_c0_seq1::g.974::m.974 [type:complete len:182 gc:universal comp1922_c0_seq1:238-783(+)]	type:complete len:184 gc:universal comp1500_c0_seq1:493-1044(+)	comp1500_c0::comp1500_c0_seq1::g.507::m.507	IS_216438_Pdol9_C_Band	0.99	0.000179099	1	1	2	0.0765027	21 kDa
comp668_c0::comp668_c0_seq1::g.1453::m.1453 [type:complete len:346 gc:universal comp668_c0_seq1:43-1080(+)]	type:complete len:346 gc:universal comp668_c0_seq1:43-1080(+)	comp668_c0::comp668_c0_seq1::g.1453::m.1453	IS_216438_Pdol9_C_Band	0.99	8.95496e-05	1	1	1	0.0289855	38 kDa
comp2617_c0::comp2617_c0_seq1::g.8530::m.8530 [type:5prime_partial len:386 gc:universal comp2617_c0_seq1:2-1159(+)]	type:5prime_partial len:386 gc:universal comp2617_c0_seq1:2-1159(+)	comp2617_c0::comp2617_c0_seq1::g.8530::m.8530	IS_216438_Pdol9_C_Band	0.9	8.95496e-05	1	1	1	0.038961	42 kDa
comp10418_c0::comp10418_c0_seq1::g.32201::m.32201 [type:5prime_partial len:306 gc:universal comp10418_c0_seq1:1-918(+)]	type:5prime_partial len:306 gc:universal comp10418_c0_seq1:1-918(+)	comp10418_c0::comp10418_c0_seq1::g.32201::m.32201	IS_216438_Pdol9_C_Band	1	8.95496e-05	1	1	1	0.052459	32 kDa
comp139_c0::comp139_c0_seq1::g.406::m.406 [type:complete len:581 gc:universal comp139_c0_seq1:173-1915(+)]	type:complete len:813 gc:universal comp139_c0_seq2:173-2611(+)	comp139_c0::comp139_c0_seq2::g.411::m.411	IS_216438_Pdol9_C_Band	0.99	8.95496e-05	1	1	1	0.0147783	89 kDa
comp11669_c0::comp11669_c0_seq1::g.33040::m.33040 [type:complete len:200 gc:universal comp11669_c0_seq1:261-860(+)]	type:complete len:200 gc:universal comp11669_c0_seq1:261-860(+)	comp11669_c0::comp11669_c0_seq1::g.33040::m.33040	IS_216438_Pdol9_C_Band	0.98	8.95496e-05	1	1	1	0.0653266	23 kDa
comp141220_c0::comp141220_c0_seq1::g.6054::m.6054 [type:5prime_partial len:416 gc:universal comp141220_c0_seq1:2-1249(+)]	type:5prime_partial len:416 gc:universal comp141220_c0_seq1:2-1249(+)	comp141220_c0::comp141220_c0_seq1::g.6054::m.6054	IS_216438_Pdol9_C_Band	1	0.000447748	5	5	5	0.142169	48 kDa
comp6467_c0::comp6467_c0_seq1::g.21633::m.21633 [type:complete len:256 gc:universal comp6467_c0_seq1:586-1353(+)]	type:complete len:256 gc:universal comp6467_c0_seq1:586-1353(+)	comp6467_c0::comp6467_c0_seq1::g.21633::m.21633	IS_216438_Pdol9_C_Band	1	0.000179099	2	2	2	0.105882	29 kDa
comp9307_c0::comp9307_c0_seq1::g.27679::m.27679 [type:complete len:370 gc:universal comp9307_c0_seq1:204-1313(+)]	type:complete len:370 gc:universal comp9307_c0_seq1:204-1313(+)	comp9307_c0::comp9307_c0_seq1::g.27679::m.27679	IS_216438_Pdol9_C_Band	0.99	8.95496e-05	1	1	1	0.0542005	42 kDa
comp621_c0::comp621_c0_seq1::g.1424::m.1424 [type:complete len:245 gc:universal comp621_c0_seq1:143-877(+)]	type:complete len:256 gc:universal comp364_c0_seq1:487-1254(+)	comp364_c0::comp364_c0_seq1::g.1211::m.1211	IS_216438_Pdol9_C_Band	0.09	0.000179099	0	0	2	0.0392157	29 kDa
comp770_c0::comp770_c0_seq1::g.1535::m.1535 [type:complete len:532 gc:universal comp770_c0_seq1:145-1740(+)]	type:complete len:532 gc:universal comp770_c0_seq1:145-1740(+)	comp770_c0::comp770_c0_seq1::g.1535::m.1535	IS_216438_Pdol9_C_Band	0.99	0.000179099	1	1	2	0.0301318	58 kDa
comp6064_c0::comp6064_c0_seq1::g.21433::m.21433 [type:complete len:508 gc:universal comp6064_c0_seq1:145-1668(+)]	type:complete len:508 gc:universal comp6064_c0_seq1:145-1668(+)	comp6064_c0::comp6064_c0_seq1::g.21433::m.21433	IS_216438_Pdol9_C_Band	0.99	8.95496e-05	1	1	1	0.0236686	57 kDa
comp303_c0::comp303_c0_seq1::g.1164::m.1164 [type:complete len:387 gc:universal comp303_c0_seq1:161-1321(+)]	type:complete len:387 gc:universal comp303_c0_seq1:161-1321(+)	comp303_c0::comp303_c0_seq1::g.1164::m.1164	IS_216438_Pdol9_C_Band	1	8.95496e-05	1	1	1	0.0518135	43 kDa
comp16_c0::comp16_c0_seq1::g.684::m.684 [type:complete len:465 gc:universal comp16_c0_seq1:362-1756(+)]	type:complete len:465 gc:universal comp16_c0_seq1:362-1756(+)	comp16_c0::comp16_c0_seq1::g.684::m.684	IS_216438_Pdol9_C_Band	0.91	8.95496e-05	0	0	1	0.0517241	51 kDa
comp1391_c0::comp1391_c0_seq1::g.394::m.394 [type:complete len:546 gc:universal comp1391_c0_seq1:173-1810(+)]	type:complete len:546 gc:universal comp1391_c0_seq1:173-1810(+)	comp1391_c0::comp1391_c0_seq1::g.394::m.394	IS_216438_Pdol9_C_Band	1	0.000179099	1	1	2	0.066055	59 kDa
comp17694_c0::comp17694_c0_seq1::g.48150::m.48150 [type:complete len:416 gc:universal comp17694_c0_seq1:117-1364(+)]	type:complete len:416 gc:universal comp17694_c0_seq1:117-1364(+)	comp17694_c0::comp17694_c0_seq1::g.48150::m.48150	IS_216438_Pdol9_C_Band	1	0.000179099	2	2	2	0.060241	47 kDa
comp1505_c0::comp1505_c0_seq1::g.511::m.511 [type:complete len:210 gc:universal comp1505_c0_seq1:220-849(+)]	type:complete len:210 gc:universal comp1505_c0_seq1:220-849(+)	comp1505_c0::comp1505_c0_seq1::g.511::m.511	IS_216438_Pdol9_C_Band	1	0.000179099	2	2	2	0.129187	24 kDa
comp2067_c0::comp2067_c0_seq2::g.8065::m.8065 [type:internal len:207 gc:universal comp2067_c0_seq2:2-619(+)]	type:internal len:207 gc:universal comp2067_c0_seq2:2-619(+)	comp2067_c0::comp2067_c0_seq2::g.8065::m.8065	IS_216438_Pdol9_C_Band	0.99	8.95496e-05	1	1	1	0.0436893	22 kDa
Unknown Protein Sequence Coverage	type:internal len:299 gc:universal comp417180_c0_seq1:3-896(+)	comp417180_c0::comp417180_c0_seq1::g.44976::m.44976	IS_216438_Pdol9_C_Band	0.19	0	0	0	0	0	36 kDa
comp490_c0::comp490_c0_seq1::g.1302::m.1302 [type:complete len:435 gc:universal comp490_c0_seq1:330-1634(+)]	type:complete len:435 gc:universal comp490_c0_seq1:330-1634(+)	comp490_c0::comp490_c0_seq1::g.1302::m.1302	IS_216438_Pdol9_C_Band	1	8.95496e-05	1	1	1	0.0276498	47 kDa
comp940_c0::comp940_c0_seq1::g.1668::m.1668 [type:5prime_partial len:268 gc:universal comp940_c0_seq1:3-806(+)]	type:5prime_partial len:268 gc:universal comp940_c0_seq1:3-806(+)	comp940_c0::comp940_c0_seq1::g.1668::m.1668	IS_216438_Pdol9_C_Band	0.99	0.000179099	1	1	2	0.0524345	29 kDa
comp14_c0::comp14_c0_seq1::g.506::m.506 [type:complete len:131 gc:universal comp14_c0_seq1:175-567(+)]	type:complete len:131 gc:universal comp14_c0_seq1:175-567(+)	comp14_c0::comp14_c0_seq1::g.506::m.506	IS_216438_Pdol9_C_Band	0.17	8.95496e-05	0	0	1	0.0846154	14 kDa
comp2812_c0::comp2812_c0_seq1::g.8717::m.8717 [type:complete len:412 gc:universal comp2812_c0_seq1:764-1999(+)]	type:complete len:412 gc:universal comp2812_c0_seq1:764-1999(+)	comp2812_c0::comp2812_c0_seq1::g.8717::m.8717	IS_216438_Pdol9_C_Band	0.99	8.95496e-05	1	1	1	0.0340633	46 kDa
Unknown Protein Sequence Coverage	type:5prime_partial len:411 gc:universal comp242663_c0_seq1:3-1235(+)	comp242663_c0::comp242663_c0_seq1::g.7399::m.7399	IS_216438_Pdol9_C_Band	0.25	0	0	0	0	0	45 kDa
comp60_c0::comp60_c0_seq1::g.1412::m.1412 [type:complete len:498 gc:universal comp60_c0_seq1:55-1548(+)]	type:complete len:498 gc:universal comp60_c0_seq1:55-1548(+)	comp60_c0::comp60_c0_seq1::g.1412::m.1412	IS_216438_Pdol9_C_Band	0.98	8.95496e-05	0	0	1	0.0241449	56 kDa
comp147_c0::comp147_c0_seq1::g.488::m.488 [type:complete len:436 gc:universal comp147_c0_seq1:226-1533(+)]	type:complete len:436 gc:universal comp1744_c0_seq1:164-1471(+)	comp1744_c0::comp1744_c0_seq1::g.741::m.741	IS_216438_Pdol9_C_Band	0.13	0.000179099	0	0	2	0.0597701	47 kDa
comp132865_c0::comp132865_c0_seq1::g.37285::m.37285 [type:3prime_partial len:145 gc:universal comp132865_c0_seq1:1208-1639(+)]	type:3prime_partial len:145 gc:universal comp132865_c0_seq1:1208-1639(+)	comp132865_c0::comp132865_c0_seq1::g.37285::m.37285	IS_216438_Pdol9_C_Band	0.98	8.95496e-05	1	1	1	0.0902778	15 kDa
comp10498_c0::comp10498_c0_seq1::g.32233::m.32233 [type:complete len:466 gc:universal comp10498_c0_seq1:243-1640(+)]	type:complete len:466 gc:universal comp10498_c0_seq1:243-1640(+)	comp10498_c0::comp10498_c0_seq1::g.32233::m.32233	IS_216438_Pdol9_C_Band	0.99	8.95496e-05	1	1	1	0.0236559	52 kDa
comp273454_c0::comp273454_c0_seq1::g.34114::m.34114 [type:5prime_partial len:301 gc:universal comp273454_c0_seq1:3-905(+)]	type:5prime_partial len:301 gc:universal comp273454_c0_seq1:3-905(+)	comp273454_c0::comp273454_c0_seq1::g.34114::m.34114	IS_216438_Pdol9_C_Band	0.9	8.95496e-05	1	1	1	0.0333333	34 kDa
sp|CAS1_BOVIN| [sp|CAS1_BOVIN|]	sp|CAS1_BOVIN|	sp|CAS1_BOVIN|	IS_216438_Pdol9_C_Band	0.98	8.95496e-05	1	1	1	0.0560748	25 kDa
comp48352_c0::comp48352_c0_seq1::g.25351::m.25351 [type:complete len:313 gc:universal comp48352_c0_seq1:247-1185(+)]	type:complete len:313 gc:universal comp48352_c0_seq1:247-1185(+)	comp48352_c0::comp48352_c0_seq1::g.25351::m.25351	IS_216438_Pdol9_C_Band	0.6	8.95496e-05	0	0	1	0.0320513	35 kDa
comp359_c0::comp359_c0_seq1::g.1209::m.1209 [type:complete len:480 gc:universal comp359_c0_seq1:219-1658(+)]	type:complete len:480 gc:universal comp359_c0_seq1:219-1658(+)	comp359_c0::comp359_c0_seq1::g.1209::m.1209	IS_216438_Pdol9_C_Band	1	0.000179099	2	2	2	0.0542798	56 kDa
comp8300_c0::comp8300_c0_seq1::g.27068::m.27068 [type:5prime_partial len:580 gc:universal comp8300_c0_seq1:2-1741(+)]	type:5prime_partial len:580 gc:universal comp8300_c0_seq1:2-1741(+)	comp8300_c0::comp8300_c0_seq1::g.27068::m.27068	IS_216438_Pdol9_C_Band	0.09	8.95496e-05	0	0	1	0.015544	68 kDa
comp477_c0::comp477_c0_seq1::g.1292::m.1292 [type:complete len:256 gc:universal comp477_c0_seq1:186-953(+)]	type:complete len:256 gc:universal comp477_c0_seq1:186-953(+)	comp477_c0::comp477_c0_seq1::g.1292::m.1292	IS_216438_Pdol9_C_Band	0.99	8.95496e-05	1	1	1	0.054902	29 kDa
comp3953_c0::comp3953_c0_seq1::g.9484::m.9484 [type:complete len:252 gc:universal comp3953_c0_seq1:575-1330(+)]	type:complete len:252 gc:universal comp3953_c0_seq1:575-1330(+)	comp3953_c0::comp3953_c0_seq1::g.9484::m.9484	IS_216438_Pdol9_C_Band	1	8.95496e-05	1	1	1	0.0557769	28 kDa
comp5944_c0::comp5944_c0_seq1::g.16419::m.16419 [type:complete len:422 gc:universal comp5944_c0_seq1:106-1371(+)]	type:complete len:422 gc:universal comp5944_c0_seq1:106-1371(+)	comp5944_c0::comp5944_c0_seq1::g.16419::m.16419	IS_216438_Pdol9_C_Band	1	0.000626847	6	6	7	0.168646	48 kDa
Unknown Protein Sequence Coverage	type:complete len:179 gc:universal comp1529_c0_seq1:269-805(+)	comp1529_c0::comp1529_c0_seq1::g.534::m.534	IS_216438_Pdol9_C_Band	0.33	0	0	0	0	0	21 kDa
Unknown Protein Sequence Coverage	type:complete len:486 gc:universal comp250_c0_seq1:142-1599(+)	comp250_c0::comp250_c0_seq1::g.1129::m.1129	IS_216438_Pdol9_C_Band	0.07	0	0	0	0	0	54 kDa
comp607235_c0::comp607235_c0_seq1::g.20869::m.20869 [type:5prime_partial len:135 gc:universal comp607235_c0_seq1:3-407(+)]	type:5prime_partial len:135 gc:universal comp607235_c0_seq1:3-407(+)	comp607235_c0::comp607235_c0_seq1::g.20869::m.20869	IS_216438_Pdol9_C_Band	1	0.000268649	3	3	3	0.313433	15 kDa
comp24_c0::comp24_c0_seq1::g.1063::m.1063 [type:complete len:377 gc:universal comp24_c0_seq1:357-1487(+)]	type:internal len:104 gc:universal comp447_c0_seq1:2-310(+)	comp447_c0::comp447_c0_seq1::g.1276::m.1276	IS_216438_Pdol9_C_Band	0.55	0.000447748	0	0	5	0.262136	11 kDa
comp24_c0::comp24_c0_seq1::g.1063::m.1063 [type:complete len:377 gc:universal comp24_c0_seq1:357-1487(+)]	type:5prime_partial len:152 gc:universal comp334720_c0_seq1:653-198(-)	comp334720_c0::comp334720_c0_seq1::g.39212::m.39212	IS_216438_Pdol9_C_Band	0.53	0.000268649	0	0	3	0.304636	17 kDa
comp1896_c0::comp1896_c0_seq1::g.937::m.937 [type:complete len:536 gc:universal comp1896_c0_seq1:78-1685(+)]	type:complete len:536 gc:universal comp1896_c0_seq1:78-1685(+)	comp1896_c0::comp1896_c0_seq1::g.937::m.937	IS_216438_Pdol9_C_Band	0.99	8.95496e-05	1	1	1	0.0280374	58 kDa
Unknown Protein Sequence Coverage	type:internal len:145 gc:universal comp162850_c0_seq1:2-433(+)	comp162850_c0::comp162850_c0_seq1::g.12388::m.12388	IS_216438_Pdol9_C_Band	0.97	0	0	0	0	0	16 kDa
comp115_c0::comp115_c0_seq1::g.135::m.135 [type:5prime_partial len:509 gc:universal comp115_c0_seq1:2-1528(+)]	type:5prime_partial len:509 gc:universal comp115_c0_seq1:2-1528(+)	comp115_c0::comp115_c0_seq1::g.135::m.135	IS_216438_Pdol9_C_Band	1	0.000358198	1	1	4	0.0807087	56 kDa
comp23414_c0::comp23414_c0_seq1::g.7109::m.7109 [type:5prime_partial len:619 gc:universal comp23414_c0_seq1:3-1859(+)]	sp|ALBU_HUMAN|	sp|ALBU_HUMAN|	IS_216438_Pdol9_C_Band	0.79	0.00125369	0	0	14	0.0656814	69 kDa
comp86023_c0::comp86023_c0_seq1::g.22505::m.22505 [type:complete len:532 gc:universal comp86023_c0_seq1:118-1713(+)]	type:complete len:532 gc:universal comp86023_c0_seq1:118-1713(+)	comp86023_c0::comp86023_c0_seq1::g.22505::m.22505	IS_216438_Pdol9_C_Band	0.99	8.95496e-05	1	1	1	0.0282486	59 kDa
comp180894_c0::comp180894_c0_seq1::g.6307::m.6307 [type:complete len:347 gc:universal comp180894_c0_seq1:3-1043(+)]	type:complete len:347 gc:universal comp180894_c0_seq1:3-1043(+)	comp180894_c0::comp180894_c0_seq1::g.6307::m.6307	IS_216438_Pdol9_C_Band	1	0.000626847	2	2	7	0.0809249	40 kDa
comp752_c0::comp752_c0_seq3::g.1507::m.1507 [type:complete len:245 gc:universal comp752_c0_seq3:55-789(+)]	type:5prime_partial len:252 gc:universal comp752_c0_seq5:1-756(+)	comp752_c0::comp752_c0_seq5::g.1509::m.1509	IS_216438_Pdol9_C_Band	0.17	8.95496e-05	0	0	1	0.0677291	27 kDa
comp83387_c0::comp83387_c0_seq1::g.11440::m.11440 [type:complete len:897 gc:universal comp83387_c0_seq1:163-2853(+)]	type:5prime_partial len:976 gc:universal comp5163_c0_seq1:1-2928(+)	comp5163_c0::comp5163_c0_seq1::g.16026::m.16026	IS_216438_Pdol9_C_Band	0.11	0.000179099	0	0	2	0.0276923	111 kDa
comp7098_c0::comp7098_c0_seq1::g.21984::m.21984 [type:complete len:558 gc:universal comp7098_c0_seq1:182-1855(+)]	type:complete len:558 gc:universal comp7098_c0_seq1:182-1855(+)	comp7098_c0::comp7098_c0_seq1::g.21984::m.21984	IS_216438_Pdol9_C_Band	1	0.000179099	2	2	2	0.05386	63 kDa
comp24877_c0::comp24877_c0_seq1::g.13132::m.13132 [type:complete len:654 gc:universal comp24877_c0_seq1:40-2001(+)]	type:complete len:654 gc:universal comp24877_c0_seq3:40-2001(+)	comp24877_c0::comp24877_c0_seq3::g.13134::m.13134	IS_216438_Pdol9_C_Band	1	8.95496e-05	1	1	1	0.0229709	73 kDa
comp117_c0::comp117_c0_seq1::g.153::m.153 [type:complete len:129 gc:universal comp117_c0_seq1:253-639(+)]	type:complete len:157 gc:universal comp128_c0_seq1:118-588(+)	comp128_c0::comp128_c0_seq1::g.308::m.308	IS_216438_Pdol9_C_Band	0.51	8.95496e-05	0	0	1	0.0576923	18 kDa
comp881_c0::comp881_c0_seq1::g.1603::m.1603 [type:complete len:143 gc:universal comp881_c0_seq1:374-802(+)]	type:complete len:143 gc:universal comp881_c0_seq1:374-802(+)	comp881_c0::comp881_c0_seq1::g.1603::m.1603	IS_216438_Pdol9_C_Band	1	8.95496e-05	1	1	1	0.084507	16 kDa
comp2766_c0::comp2766_c0_seq2::g.8706::m.8706 [type:3prime_partial len:125 gc:universal comp2766_c0_seq2:194-565(+)]	type:3prime_partial len:125 gc:universal comp2766_c0_seq2:194-565(+)	comp2766_c0::comp2766_c0_seq2::g.8706::m.8706	IS_216438_Pdol9_C_Band	1	0.000179099	2	2	2	0.266129	14 kDa
comp24_c0::comp24_c0_seq1::g.1063::m.1063 [type:complete len:377 gc:universal comp24_c0_seq1:357-1487(+)]	type:3prime_partial len:159 gc:universal comp73804_c0_seq1:1-474(+)	comp73804_c0::comp73804_c0_seq1::g.36532::m.36532	IS_216438_Pdol9_C_Band	0.42	0.000268649	0	0	3	0.183544	18 kDa
comp23414_c0::comp23414_c0_seq1::g.7109::m.7109 [type:5prime_partial len:619 gc:universal comp23414_c0_seq1:3-1859(+)]	type:5prime_partial len:619 gc:universal comp23414_c0_seq1:3-1859(+)	comp23414_c0::comp23414_c0_seq1::g.7109::m.7109	IS_216438_Pdol9_C_Band	1	0.00107459	1	2	12	0.079288	70 kDa
comp9388_c0::comp9388_c0_seq1::g.27754::m.27754 [type:5prime_partial len:343 gc:universal comp9388_c0_seq1:3-1031(+)]	type:5prime_partial len:343 gc:universal comp9388_c0_seq1:3-1031(+)	comp9388_c0::comp9388_c0_seq1::g.27754::m.27754	IS_216438_Pdol9_C_Band	1	0.000358198	3	3	4	0.116959	39 kDa
comp3239_c0::comp3239_c0_seq1::g.8968::m.8968 [type:complete len:491 gc:universal comp3239_c0_seq1:195-1667(+)]	type:complete len:491 gc:universal comp3239_c0_seq1:195-1667(+)	comp3239_c0::comp3239_c0_seq1::g.8968::m.8968	IS_216438_Pdol9_C_Band	0.99	8.95496e-05	1	1	1	0.0387755	54 kDa
comp391_c0::comp391_c0_seq1::g.1232::m.1232 [type:internal len:257 gc:universal comp391_c0_seq1:2-769(+)]	type:internal len:286 gc:universal comp1057_c1_seq1:2-856(+)	comp1057_c1::comp1057_c1_seq1::g.41::m.41	IS_216438_Pdol9_C_Band	0.73	0.000179099	0	0	2	0.0526316	32 kDa
comp777_c0::comp777_c0_seq1::g.1540::m.1540 [type:complete len:167 gc:universal comp777_c0_seq1:213-713(+)]	type:complete len:167 gc:universal comp777_c0_seq1:213-713(+)	comp777_c0::comp777_c0_seq1::g.1540::m.1540	IS_216438_Pdol9_C_Band	0.98	8.95496e-05	1	1	1	0.0722892	18 kDa
comp27740_c0::comp27740_c0_seq1::g.19500::m.19500 [type:complete len:323 gc:universal comp27740_c0_seq1:211-1179(+)]	type:complete len:323 gc:universal comp27740_c0_seq1:211-1179(+)	comp27740_c0::comp27740_c0_seq1::g.19500::m.19500	IS_216438_Pdol9_C_Band	0.99	0.000179099	1	1	2	0.0341615	37 kDa
comp2193_c0::comp2193_c0_seq1::g.8130::m.8130 [type:complete len:212 gc:universal comp2193_c0_seq1:174-809(+)]	type:complete len:212 gc:universal comp2193_c0_seq1:174-809(+)	comp2193_c0::comp2193_c0_seq1::g.8130::m.8130	IS_216438_Pdol9_C_Band	0.99	8.95496e-05	1	1	1	0.0710901	23 kDa
comp24_c0::comp24_c0_seq1::g.1063::m.1063 [type:complete len:377 gc:universal comp24_c0_seq1:357-1487(+)]	type:complete len:377 gc:universal comp24_c0_seq4:165-1295(+)	comp24_c0::comp24_c0_seq4::g.1071::m.1071	IS_216438_Pdol9_C_Band	0.91	0.00134324	0	0	15	0.300532	42 kDa
Unknown Protein Sequence Coverage	type:5prime_partial len:124 gc:universal comp372295_c0_seq1:3-374(+)	comp372295_c0::comp372295_c0_seq1::g.35094::m.35094	IS_216438_Pdol9_C_Band	0.76	0	0	0	0	0	14 kDa
comp16329_c0::comp16329_c0_seq2::g.47576::m.47576 [type:complete len:457 gc:universal comp16329_c0_seq2:90-1460(+)]	type:complete len:457 gc:universal comp16329_c0_seq2:90-1460(+)	comp16329_c0::comp16329_c0_seq2::g.47576::m.47576	IS_216438_Pdol9_C_Band	0.99	8.95496e-05	1	1	1	0.0263158	53 kDa
comp67048_c0::comp67048_c0_seq1::g.21149::m.21149 [type:complete len:543 gc:universal comp67048_c0_seq1:163-1791(+)]	type:complete len:543 gc:universal comp67048_c0_seq1:163-1791(+)	comp67048_c0::comp67048_c0_seq1::g.21149::m.21149	IS_216438_Pdol9_C_Band	1	0.000179099	1	1	2	0.0258303	60 kDa
Unknown Protein Sequence Coverage	type:complete len:252 gc:universal comp3762_c0_seq1:130-885(+)	comp3762_c0::comp3762_c0_seq1::g.9361::m.9361	IS_216438_Pdol9_C_Band	0.08	0	0	0	0	0	29 kDa
comp24_c0::comp24_c0_seq1::g.1063::m.1063 [type:complete len:377 gc:universal comp24_c0_seq1:357-1487(+)]	type:internal len:133 gc:universal comp232051_c0_seq3:398-3(-)	comp232051_c0::comp232051_c0_seq3::g.33914::m.33914	IS_216438_Pdol9_C_Band	0.62	0.000716397	0	0	8	0.386364	15 kDa
sp|K1HA_HUMAN| [sp|K1HA_HUMAN|]	sp|K1HA_HUMAN|	sp|K1HA_HUMAN|	IS_216438_Pdol9_C_Band	0.88	8.95496e-05	0	0	1	0.0222772	46 kDa
comp2148_c0::comp2148_c0_seq1::g.8109::m.8109 [type:5prime_partial len:147 gc:universal comp2148_c0_seq1:2-442(+)]	type:5prime_partial len:147 gc:universal comp2148_c0_seq1:2-442(+)	comp2148_c0::comp2148_c0_seq1::g.8109::m.8109	IS_216438_Pdol9_C_Band	0.7	0.000179099	0	0	2	0.0890411	16 kDa
comp752_c0::comp752_c0_seq3::g.1507::m.1507 [type:complete len:245 gc:universal comp752_c0_seq3:55-789(+)]	type:complete len:245 gc:universal comp752_c0_seq3:55-789(+)	comp752_c0::comp752_c0_seq3::g.1507::m.1507	IS_216438_Pdol9_C_Band	0.6	8.95496e-05	0	0	1	0.0696721	26 kDa
comp20459_c0::comp20459_c0_seq1::g.1982::m.1982 [type:complete len:228 gc:universal comp20459_c0_seq1:167-850(+)]	type:complete len:228 gc:universal comp20459_c0_seq1:167-850(+)	comp20459_c0::comp20459_c0_seq1::g.1982::m.1982	IS_216438_Pdol9_C_Band	0.96	8.95496e-05	1	1	1	0.0484581	25 kDa
comp21785_c0::comp21785_c0_seq1::g.2531::m.2531 [type:complete len:481 gc:universal comp21785_c0_seq1:207-1649(+)]	type:complete len:481 gc:universal comp21785_c0_seq1:207-1649(+)	comp21785_c0::comp21785_c0_seq1::g.2531::m.2531	IS_216438_Pdol9_C_Band	1	0.000358198	3	3	4	0.0791667	53 kDa
comp117_c0::comp117_c0_seq1::g.153::m.153 [type:complete len:129 gc:universal comp117_c0_seq1:253-639(+)]	sp|RS27A_HUMAN|	sp|RS27A_HUMAN|	IS_216438_Pdol9_C_Band	0.45	8.95496e-05	0	0	1	0.0576923	18 kDa
comp62520_c0::comp62520_c0_seq1::g.10660::m.10660 [type:3prime_partial len:444 gc:universal comp62520_c0_seq1:141-1469(+)]	type:5prime_partial len:488 gc:universal comp890_c0_seq1:1-1464(+)	comp890_c0::comp890_c0_seq1::g.1609::m.1609	IS_216438_Pdol9_C_Band	0.71	0.000268649	0	0	3	0.0841889	54 kDa
comp24_c0::comp24_c0_seq1::g.1063::m.1063 [type:complete len:377 gc:universal comp24_c0_seq1:357-1487(+)]	type:5prime_partial len:290 gc:universal comp252744_c0_seq1:3-872(+)	comp252744_c0::comp252744_c0_seq1::g.34006::m.34006	IS_216438_Pdol9_C_Band	0.09	0.000537297	0	0	6	0.117647	32 kDa
Unknown Protein Sequence Coverage	type:5prime_partial len:103 gc:universal comp118526_c0_seq1:2-310(+)	comp118526_c0::comp118526_c0_seq1::g.51803::m.51803	IS_216438_Pdol9_C_Band	0.14	0	0	0	0	0	12 kDa
comp510_c0::comp510_c0_seq1::g.1333::m.1333 [type:internal len:139 gc:universal comp510_c0_seq1:3-416(+)]	type:internal len:139 gc:universal comp510_c0_seq1:3-416(+)	comp510_c0::comp510_c0_seq1::g.1333::m.1333	IS_216438_Pdol9_C_Band	1	0.000179099	1	1	2	0.166667	16 kDa
comp62520_c0::comp62520_c0_seq1::g.10660::m.10660 [type:3prime_partial len:444 gc:universal comp62520_c0_seq1:141-1469(+)]	type:internal len:147 gc:universal comp262596_c0_seq1:3-440(+)	comp262596_c0::comp262596_c0_seq1::g.7513::m.7513	IS_216438_Pdol9_C_Band	0.12	8.95496e-05	0	0	1	0.10274	16 kDa
comp141639_c0::comp141639_c0_seq1::g.6090::m.6090 [type:5prime_partial len:188 gc:universal comp141639_c0_seq1:1-564(+)]	type:5prime_partial len:188 gc:universal comp141639_c0_seq1:1-564(+)	comp141639_c0::comp141639_c0_seq1::g.6090::m.6090	IS_216438_Pdol9_C_Band	0.99	8.95496e-05	1	1	1	0.0748663	21 kDa
comp142296_c0::comp142296_c0_seq1::g.12170::m.12170 [type:3prime_partial len:165 gc:universal comp142296_c0_seq1:256-747(+)]	type:3prime_partial len:165 gc:universal comp142296_c0_seq1:256-747(+)	comp142296_c0::comp142296_c0_seq1::g.12170::m.12170	IS_216438_Pdol9_C_Band	0.91	8.95496e-05	1	1	1	0.0670732	18 kDa
comp215_c0::comp215_c0_seq1::g.1035::m.1035 [type:complete len:647 gc:universal comp215_c0_seq1:166-2106(+)]	type:complete len:650 gc:universal comp2180_c0_seq1:159-2108(+)	comp2180_c0::comp2180_c0_seq1::g.8125::m.8125	IS_216438_Pdol9_C_Band	0.06	0.000268649	0	0	3	0.0570108	71 kDa
comp62520_c0::comp62520_c0_seq1::g.10660::m.10660 [type:3prime_partial len:444 gc:universal comp62520_c0_seq1:141-1469(+)]	type:3prime_partial len:444 gc:universal comp62520_c0_seq1:141-1469(+)	comp62520_c0::comp62520_c0_seq1::g.10660::m.10660	IS_216438_Pdol9_C_Band	0.4	0.000179099	0	0	2	0.0654628	50 kDa
comp872_c0::comp872_c0_seq1::g.1599::m.1599 [type:complete len:528 gc:universal comp872_c0_seq1:335-1918(+)]	type:complete len:528 gc:universal comp872_c0_seq1:335-1918(+)	comp872_c0::comp872_c0_seq1::g.1599::m.1599	IS_216438_Pdol9_C_Band	1	0.000268649	2	2	3	0.0607211	57 kDa
Unknown Protein Sequence Coverage	type:complete len:137 gc:universal comp1551_c0_seq1:175-585(+)	comp1551_c0::comp1551_c0_seq1::g.581::m.581	IS_216438_Pdol9_C_Band	0.44	0	0	0	0	0	15 kDa
comp2098_c0::comp2098_c0_seq1::g.8084::m.8084 [type:complete len:521 gc:universal comp2098_c0_seq1:306-1868(+)]	type:complete len:454 gc:universal comp4609_c0_seq1:75-1436(+)	comp4609_c0::comp4609_c0_seq1::g.15591::m.15591	IS_216438_Pdol9_C_Band	0.96	0.000179099	0	0	2	0.0198676	52 kDa
comp16_c0::comp16_c0_seq1::g.684::m.684 [type:complete len:465 gc:universal comp16_c0_seq1:362-1756(+)]	type:complete len:463 gc:universal comp98495_c0_seq1:53-1441(+)	comp98495_c0::comp98495_c0_seq1::g.51488::m.51488	IS_216438_Pdol9_C_Band	0.07	8.95496e-05	0	0	1	0.0519481	50 kDa
comp391_c0::comp391_c0_seq1::g.1232::m.1232 [type:internal len:257 gc:universal comp391_c0_seq1:2-769(+)]	type:internal len:257 gc:universal comp391_c0_seq1:2-769(+)	comp391_c0::comp391_c0_seq1::g.1232::m.1232	IS_216438_Pdol9_C_Band	0.53	0.000268649	0	0	3	0.105469	29 kDa
comp646_c0::comp646_c0_seq1::g.1437::m.1437 [type:3prime_partial len:109 gc:universal comp646_c0_seq1:180-503(+)]	type:3prime_partial len:109 gc:universal comp646_c0_seq1:180-503(+)	comp646_c0::comp646_c0_seq1::g.1437::m.1437	IS_216438_Pdol9_C_Band	0.98	0.000179099	1	1	2	0.324074	12 kDa
sp|K1HA_HUMAN| [sp|K1HA_HUMAN|]	sp|K1HB_HUMAN|	sp|K1HB_HUMAN|	IS_216438_Pdol9_C_Band	0.62	8.95496e-05	0	0	1	0.0222772	46 kDa
END OF FILE

## Sheet: Peptide Table Report_SRA
Sequence Coverage	Protein	Accession	Bio Sample	Probability	% of total Spectrum	Unique Peptide Counts	Unique Spectrum Counts	Total Spectrum Counts	% of amino acids identified	m.w.
sp|ALBU_BOVIN| [sp|ALBU_BOVIN|]	sp|ALBU_BOVIN|	sp|ALBU_BOVIN|	IS_216438_Aes_Gill_Mucus_lane_Pann_DB	1	0.00491627	35	53	128	0.716639	69 kDa
SRR7978_TRINITY_DN19380_c1_g1::SRR7978_TRINITY_DN19380_c1_g1_i3::g.40942::m.40942 [type:complete len:104 gc:universal SRR7978_TRINITY_DN19380_c1_g1_i3:156-467(+)]	type:5prime_partial len:128 gc:universal SRR1329_TRINITY_DN353425_c12_g2_i10:543-160(-)	SRR1329_TRINITY_DN353425_c12_g2::SRR1329_TRINITY_DN353425_c12_g2_i10::g.167703::m.167703	IS_216438_Aes_Gill_Mucus_lane_Pann_DB	1	0.00103703	6	11	27	0.417323	14 kDa
SRR7978_TRINITY_DN14411_c1_g1::SRR7978_TRINITY_DN14411_c1_g1_i2::g.31295::m.31295 [type:5prime_partial len:252 gc:universal SRR7978_TRINITY_DN14411_c1_g1_i2:1674-919(-)]	type:5prime_partial len:252 gc:universal SRR7978_TRINITY_DN14411_c1_g1_i2:1674-919(-)	SRR7978_TRINITY_DN14411_c1_g1::SRR7978_TRINITY_DN14411_c1_g1_i2::g.31295::m.31295	IS_216438_Aes_Gill_Mucus_lane_Pann_DB	1	0.000768167	10	12	20	0.450199	28 kDa
sp|K2C1_HUMAN| [sp|K2C1_HUMAN|]	sp|K2C1_HUMAN|	sp|K2C1_HUMAN|	IS_216438_Aes_Gill_Mucus_lane_Pann_DB	1	0.00234291	20	23	61	0.424572	66 kDa
sp|K1C9_HUMAN| [sp|K1C9_HUMAN|]	sp|K1C9_HUMAN|	sp|K1C9_HUMAN|	IS_216438_Aes_Gill_Mucus_lane_Pann_DB	1	0.00207405	18	25	54	0.346709	62 kDa
sp|K1C10_HUMAN| [sp|K1C10_HUMAN|]	sp|K1C10_HUMAN|	sp|K1C10_HUMAN|	IS_216438_Aes_Gill_Mucus_lane_Pann_DB	1	0.00142111	12	14	37	0.347386	60 kDa
SRR7980_TRINITY_DN18311_c3_g1::SRR7980_TRINITY_DN18311_c3_g1_i1::g.72213::m.72213 [type:complete len:243 gc:universal SRR7980_TRINITY_DN18311_c3_g1_i1:6206-5478(-)]	type:complete len:243 gc:universal SRR7980_TRINITY_DN18311_c3_g1_i1:6206-5478(-)	SRR7980_TRINITY_DN18311_c3_g1::SRR7980_TRINITY_DN18311_c3_g1_i1::g.72213::m.72213	IS_216438_Aes_Gill_Mucus_lane_Pann_DB	1	0.000921801	5	7	24	0.210744	28 kDa
SRR7978_TRINITY_DN14411_c1_g3::SRR7978_TRINITY_DN14411_c1_g3_i1::g.31296::m.31296 [type:internal len:171 gc:universal SRR7978_TRINITY_DN14411_c1_g3_i1:3-512(+)]	type:internal len:171 gc:universal SRR7978_TRINITY_DN14411_c1_g3_i1:3-512(+)	SRR7978_TRINITY_DN14411_c1_g3::SRR7978_TRINITY_DN14411_c1_g3_i1::g.31296::m.31296	IS_216438_Aes_Gill_Mucus_lane_Pann_DB	1	0.0004609	7	9	12	0.535294	19 kDa
sp|K22E_HUMAN| [sp|K22E_HUMAN|]	sp|K22E_HUMAN|	sp|K22E_HUMAN|	IS_216438_Aes_Gill_Mucus_lane_Pann_DB	1	0.000729759	9	9	19	0.213953	66 kDa
sp|TRYP_PIG| [sp|TRYP_PIG|]	sp|TRYP_PIG|	sp|TRYP_PIG|	IS_216438_Aes_Gill_Mucus_lane_Pann_DB	0.99	0.00215087	3	3	56	0.164502	24 kDa
SRR1330_TRINITY_DN122443_c0_g1::SRR1330_TRINITY_DN122443_c0_g1_i1::g.219674::m.219674 [type:complete len:1459 gc:universal SRR1330_TRINITY_DN122443_c0_g1_i1:5963-1587(-)]	type:complete len:1459 gc:universal SRR1330_TRINITY_DN122443_c0_g1_i1:5963-1587(-)	SRR1330_TRINITY_DN122443_c0_g1::SRR1330_TRINITY_DN122443_c0_g1_i1::g.219674::m.219674	IS_216438_Aes_Gill_Mucus_lane_Pann_DB	1	0.00337994	44	53	88	0.368999	162 kDa
SRR7979_TRINITY_DN18586_c1_g3::SRR7979_TRINITY_DN18586_c1_g3_i1::g.60315::m.60315 [type:complete len:615 gc:universal SRR7979_TRINITY_DN18586_c1_g3_i1:321-2165(+)]	type:complete len:706 gc:universal SRR1330_TRINITY_DN122622_c11_g1_i10:2271-154(-)	SRR1330_TRINITY_DN122622_c11_g1::SRR1330_TRINITY_DN122622_c11_g1_i10::g.217406::m.217406	IS_216438_Aes_Gill_Mucus_lane_Pann_DB	1	0.000192042	3	3	5	0.0524823	79 kDa
SRR8017_TRINITY_DN50100_c0_g1::SRR8017_TRINITY_DN50100_c0_g1_i1::g.120442::m.120442 [type:complete len:720 gc:universal SRR8017_TRINITY_DN50100_c0_g1_i1:2330-171(-)]	type:complete len:720 gc:universal SRR8017_TRINITY_DN50100_c0_g1_i1:2330-171(-)	SRR8017_TRINITY_DN50100_c0_g1::SRR8017_TRINITY_DN50100_c0_g1_i1::g.120442::m.120442	IS_216438_Aes_Gill_Mucus_lane_Pann_DB	1	7.68167e-05	2	2	2	0.0403338	82 kDa
SRR1330_TRINITY_DN124479_c0_g1::SRR1330_TRINITY_DN124479_c0_g1_i6::g.230241::m.230241 [type:complete len:686 gc:universal SRR1330_TRINITY_DN124479_c0_g1_i6:2245-188(-)]	type:complete len:686 gc:universal SRR1330_TRINITY_DN124479_c0_g1_i6:2245-188(-)	SRR1330_TRINITY_DN124479_c0_g1::SRR1330_TRINITY_DN124479_c0_g1_i6::g.230241::m.230241	IS_216438_Aes_Gill_Mucus_lane_Pann_DB	1	0.000192042	2	3	5	0.0467153	77 kDa
SRR7914_TRINITY_DN29934_c0_g1::SRR7914_TRINITY_DN29934_c0_g1_i7::g.10782::m.10782 [type:complete len:335 gc:universal SRR7914_TRINITY_DN29934_c0_g1_i7:266-1270(+)]	type:complete len:335 gc:universal SRR7914_TRINITY_DN29934_c0_g1_i7:266-1270(+)	SRR7914_TRINITY_DN29934_c0_g1::SRR7914_TRINITY_DN29934_c0_g1_i7::g.10782::m.10782	IS_216438_Aes_Gill_Mucus_lane_Pann_DB	1	0.000384084	4	6	10	0.275449	36 kDa
SRR8017_TRINITY_DN25002_c7_g2::SRR8017_TRINITY_DN25002_c7_g2_i7::g.121404::m.121404 [type:complete len:857 gc:universal SRR8017_TRINITY_DN25002_c7_g2_i7:5780-3210(-)]	type:complete len:857 gc:universal SRR8017_TRINITY_DN25002_c7_g2_i7:5780-3210(-)	SRR8017_TRINITY_DN25002_c7_g2::SRR8017_TRINITY_DN25002_c7_g2_i7::g.121404::m.121404	IS_216438_Aes_Gill_Mucus_lane_Pann_DB	1	0.000384084	2	3	10	0.0969626	96 kDa
SRR7978_TRINITY_DN19466_c0_g1::SRR7978_TRINITY_DN19466_c0_g1_i1::g.44911::m.44911 [type:5prime_partial len:158 gc:universal SRR7978_TRINITY_DN19466_c0_g1_i1:1-474(+)]	type:5prime_partial len:158 gc:universal SRR7978_TRINITY_DN19466_c0_g1_i1:1-474(+)	SRR7978_TRINITY_DN19466_c0_g1::SRR7978_TRINITY_DN19466_c0_g1_i1::g.44911::m.44911	IS_216438_Aes_Gill_Mucus_lane_Pann_DB	1	0.000153633	3	3	4	0.254777	17 kDa
SRR1330_TRINITY_DN110493_c0_g1::SRR1330_TRINITY_DN110493_c0_g1_i2::g.250426::m.250426 [type:complete len:339 gc:universal SRR1330_TRINITY_DN110493_c0_g1_i2:92-1108(+)]	type:complete len:339 gc:universal SRR1330_TRINITY_DN110493_c0_g1_i2:92-1108(+)	SRR1330_TRINITY_DN110493_c0_g1::SRR1330_TRINITY_DN110493_c0_g1_i2::g.250426::m.250426	IS_216438_Aes_Gill_Mucus_lane_Pann_DB	1	0.000307267	4	5	8	0.183432	38 kDa
SRR1330_TRINITY_DN116543_c0_g1::SRR1330_TRINITY_DN116543_c0_g1_i2::g.206660::m.206660 [type:5prime_partial len:349 gc:universal SRR1330_TRINITY_DN116543_c0_g1_i2:1969-923(-)]	type:5prime_partial len:349 gc:universal SRR1330_TRINITY_DN116543_c0_g1_i2:1969-923(-)	SRR1330_TRINITY_DN116543_c0_g1::SRR1330_TRINITY_DN116543_c0_g1_i2::g.206660::m.206660	IS_216438_Aes_Gill_Mucus_lane_Pann_DB	1	0.00023045	5	5	6	0.206897	39 kDa
SRR1330_TRINITY_DN113424_c0_g4::SRR1330_TRINITY_DN113424_c0_g4_i1::g.247036::m.247036 [type:internal len:323 gc:universal SRR1330_TRINITY_DN113424_c0_g4_i1:3-968(+)]	type:internal len:215 gc:universal SRR7978_TRINITY_DN11304_c0_g1_i2:1-642(+)	SRR7978_TRINITY_DN11304_c0_g1::SRR7978_TRINITY_DN11304_c0_g1_i2::g.33775::m.33775	IS_216438_Aes_Gill_Mucus_lane_Pann_DB	1	0.000115225	2	2	3	0.140187	23 kDa
SRR1330_TRINITY_DN114860_c0_g1::SRR1330_TRINITY_DN114860_c0_g1_i3::g.229783::m.229783 [type:complete len:121 gc:universal SRR1330_TRINITY_DN114860_c0_g1_i3:63-425(+)]	type:complete len:121 gc:universal SRR1330_TRINITY_DN114860_c0_g1_i3:63-425(+)	SRR1330_TRINITY_DN114860_c0_g1::SRR1330_TRINITY_DN114860_c0_g1_i3::g.229783::m.229783	IS_216438_Aes_Gill_Mucus_lane_Pann_DB	1	0.000192042	3	4	5	0.35	14 kDa
SRR7978_TRINITY_DN19380_c0_g1::SRR7978_TRINITY_DN19380_c0_g1_i4::g.40935::m.40935 [type:5prime_partial len:128 gc:universal SRR7978_TRINITY_DN19380_c0_g1_i4:1-384(+)]	type:5prime_partial len:153 gc:universal SRR7980_TRINITY_DN18366_c7_g1_i4:1-459(+)	SRR7980_TRINITY_DN18366_c7_g1::SRR7980_TRINITY_DN18366_c7_g1_i4::g.72275::m.72275	IS_216438_Aes_Gill_Mucus_lane_Pann_DB	1	0.00069135	1	3	18	0.296053	17 kDa
SRR7978_TRINITY_DN19127_c0_g1::SRR7978_TRINITY_DN19127_c0_g1_i2::g.37710::m.37710 [type:5prime_partial len:462 gc:universal SRR7978_TRINITY_DN19127_c0_g1_i2:1-1386(+)]	type:internal len:501 gc:universal SRR7914_TRINITY_DN28680_c0_g1_i2:3-1502(+)	SRR7914_TRINITY_DN28680_c0_g1::SRR7914_TRINITY_DN28680_c0_g1_i2::g.14784::m.14784	IS_216438_Aes_Gill_Mucus_lane_Pann_DB	1	0.00307267	4	4	80	0.476	53 kDa
SRR7978_TRINITY_DN19127_c0_g1::SRR7978_TRINITY_DN19127_c0_g1_i2::g.37710::m.37710 [type:5prime_partial len:462 gc:universal SRR7978_TRINITY_DN19127_c0_g1_i2:1-1386(+)]	type:complete len:350 gc:universal SRR7980_TRINITY_DN19221_c2_g4_i1:175-1224(+)	SRR7980_TRINITY_DN19221_c2_g4::SRR7980_TRINITY_DN19221_c2_g4_i1::g.76688::m.76688	IS_216438_Aes_Gill_Mucus_lane_Pann_DB	1	0.00291904	3	3	76	0.553009	38 kDa
SRR8017_TRINITY_DN74840_c0_g1::SRR8017_TRINITY_DN74840_c0_g1_i1::g.116240::m.116240 [type:3prime_partial len:117 gc:universal SRR8017_TRINITY_DN74840_c0_g1_i1:349-2(-)]	type:3prime_partial len:117 gc:universal SRR8017_TRINITY_DN74840_c0_g1_i1:349-2(-)	SRR8017_TRINITY_DN74840_c0_g1::SRR8017_TRINITY_DN74840_c0_g1_i1::g.116240::m.116240	IS_216438_Aes_Gill_Mucus_lane_Pann_DB	1	0.000192042	4	4	5	0.482759	13 kDa
SRR7978_TRINITY_DN11440_c0_g1::SRR7978_TRINITY_DN11440_c0_g1_i1::g.32770::m.32770 [type:complete len:338 gc:universal SRR7978_TRINITY_DN11440_c0_g1_i1:669-1682(+)]	type:complete len:338 gc:universal SRR7978_TRINITY_DN11440_c0_g1_i1:669-1682(+)	SRR7978_TRINITY_DN11440_c0_g1::SRR7978_TRINITY_DN11440_c0_g1_i1::g.32770::m.32770	IS_216438_Aes_Gill_Mucus_lane_Pann_DB	1	0.000345675	6	6	9	0.237389	38 kDa
SRR1330_TRINITY_DN118385_c7_g1::SRR1330_TRINITY_DN118385_c7_g1_i1::g.244778::m.244778 [type:internal len:914 gc:universal SRR1330_TRINITY_DN118385_c7_g1_i1:1-2739(+)]	type:internal len:914 gc:universal SRR1330_TRINITY_DN118385_c7_g1_i1:1-2739(+)	SRR1330_TRINITY_DN118385_c7_g1::SRR1330_TRINITY_DN118385_c7_g1_i1::g.244778::m.244778	IS_216438_Aes_Gill_Mucus_lane_Pann_DB	1	0.000537717	7	8	14	0.108434	101 kDa
SRR7914_TRINITY_DN29665_c3_g6::SRR7914_TRINITY_DN29665_c3_g6_i1::g.7308::m.7308 [type:complete len:365 gc:universal SRR7914_TRINITY_DN29665_c3_g6_i1:350-1444(+)]	type:complete len:365 gc:universal SRR7914_TRINITY_DN29665_c3_g6_i1:350-1444(+)	SRR7914_TRINITY_DN29665_c3_g6::SRR7914_TRINITY_DN29665_c3_g6_i1::g.7308::m.7308	IS_216438_Aes_Gill_Mucus_lane_Pann_DB	1	7.68167e-05	2	2	2	0.0714286	40 kDa
SRR7914_TRINITY_DN32362_c3_g4::SRR7914_TRINITY_DN32362_c3_g4_i2::g.2808::m.2808 [type:complete len:556 gc:universal SRR7914_TRINITY_DN32362_c3_g4_i2:342-2009(+)]	type:complete len:556 gc:universal SRR7914_TRINITY_DN32362_c3_g4_i2:342-2009(+)	SRR7914_TRINITY_DN32362_c3_g4::SRR7914_TRINITY_DN32362_c3_g4_i2::g.2808::m.2808	IS_216438_Aes_Gill_Mucus_lane_Pann_DB	1	0.000115225	3	3	3	0.0918919	62 kDa
SRR7979_TRINITY_DN16842_c3_g1::SRR7979_TRINITY_DN16842_c3_g1_i2::g.56019::m.56019 [type:complete len:165 gc:universal SRR7979_TRINITY_DN16842_c3_g1_i2:1297-1791(+)]	type:5prime_partial len:167 gc:universal SRR1329_TRINITY_DN355037_c7_g2_i11:704-204(-)	SRR1329_TRINITY_DN355037_c7_g2::SRR1329_TRINITY_DN355037_c7_g2_i11::g.184116::m.184116	IS_216438_Aes_Gill_Mucus_lane_Pann_DB	1	0.00023045	4	4	6	0.174699	19 kDa
SRR7978_TRINITY_DN39042_c0_g1::SRR7978_TRINITY_DN39042_c0_g1_i1::g.39245::m.39245 [type:internal len:116 gc:universal SRR7978_TRINITY_DN39042_c0_g1_i1:1-345(+)]	type:internal len:116 gc:universal SRR7978_TRINITY_DN39042_c0_g1_i1:1-345(+)	SRR7978_TRINITY_DN39042_c0_g1::SRR7978_TRINITY_DN39042_c0_g1_i1::g.39245::m.39245	IS_216438_Aes_Gill_Mucus_lane_Pann_DB	1	0.000192042	3	4	5	0.234783	12 kDa
SRR8017_TRINITY_DN26574_c4_g4::SRR8017_TRINITY_DN26574_c4_g4_i2::g.116904::m.116904 [type:complete len:455 gc:universal SRR8017_TRINITY_DN26574_c4_g4_i2:766-2130(+)]	type:complete len:455 gc:universal SRR8017_TRINITY_DN26574_c4_g4_i2:766-2130(+)	SRR8017_TRINITY_DN26574_c4_g4::SRR8017_TRINITY_DN26574_c4_g4_i2::g.116904::m.116904	IS_216438_Aes_Gill_Mucus_lane_Pann_DB	1	0.000115225	3	3	3	0.0748899	51 kDa
SRR1330_TRINITY_DN103436_c0_g1::SRR1330_TRINITY_DN103436_c0_g1_i1::g.224133::m.224133 [type:complete len:322 gc:universal SRR1330_TRINITY_DN103436_c0_g1_i1:291-1256(+)]	type:complete len:322 gc:universal SRR1330_TRINITY_DN103436_c0_g1_i1:291-1256(+)	SRR1330_TRINITY_DN103436_c0_g1::SRR1330_TRINITY_DN103436_c0_g1_i1::g.224133::m.224133	IS_216438_Aes_Gill_Mucus_lane_Pann_DB	1	0.000307267	5	6	8	0.258567	36 kDa
SRR1330_TRINITY_DN157030_c0_g1::SRR1330_TRINITY_DN157030_c0_g1_i1::g.221227::m.221227 [type:3prime_partial len:599 gc:universal SRR1330_TRINITY_DN157030_c0_g1_i1:138-1931(+)]	type:3prime_partial len:599 gc:universal SRR1330_TRINITY_DN157030_c0_g1_i1:138-1931(+)	SRR1330_TRINITY_DN157030_c0_g1::SRR1330_TRINITY_DN157030_c0_g1_i1::g.221227::m.221227	IS_216438_Aes_Gill_Mucus_lane_Pann_DB	1	0.000384084	7	7	10	0.160535	64 kDa
SRR1330_TRINITY_DN105931_c0_g1::SRR1330_TRINITY_DN105931_c0_g1_i1::g.231800::m.231800 [type:5prime_partial len:379 gc:universal SRR1330_TRINITY_DN105931_c0_g1_i1:1-1137(+)]	type:5prime_partial len:379 gc:universal SRR1330_TRINITY_DN105931_c0_g1_i1:1-1137(+)	SRR1330_TRINITY_DN105931_c0_g1::SRR1330_TRINITY_DN105931_c0_g1_i1::g.231800::m.231800	IS_216438_Aes_Gill_Mucus_lane_Pann_DB	1	0.000192042	3	3	5	0.10582	43 kDa
SRR1330_TRINITY_DN124323_c2_g2::SRR1330_TRINITY_DN124323_c2_g2_i7::g.210654::m.210654 [type:5prime_partial len:328 gc:universal SRR1330_TRINITY_DN124323_c2_g2_i7:3-986(+)]	type:3prime_partial len:155 gc:universal SRR8020_TRINITY_DN80519_c0_g1_i1:211-672(+)	SRR8020_TRINITY_DN80519_c0_g1::SRR8020_TRINITY_DN80519_c0_g1_i1::g.130757::m.130757	IS_216438_Aes_Gill_Mucus_lane_Pann_DB	1	0.000384084	3	5	10	0.305195	17 kDa
SRR7978_TRINITY_DN18459_c0_g1::SRR7978_TRINITY_DN18459_c0_g1_i1::g.35666::m.35666 [type:complete len:554 gc:universal SRR7978_TRINITY_DN18459_c0_g1_i1:376-2037(+)]	type:complete len:554 gc:universal SRR7978_TRINITY_DN18459_c0_g1_i1:376-2037(+)	SRR7978_TRINITY_DN18459_c0_g1::SRR7978_TRINITY_DN18459_c0_g1_i1::g.35666::m.35666	IS_216438_Aes_Gill_Mucus_lane_Pann_DB	1	0.000345675	4	5	9	0.0886076	60 kDa
SRR8017_TRINITY_DN24969_c9_g5::SRR8017_TRINITY_DN24969_c9_g5_i1::g.108981::m.108981 [type:complete len:173 gc:universal SRR8017_TRINITY_DN24969_c9_g5_i1:225-743(+)]	type:complete len:233 gc:universal SRR8017_TRINITY_DN24969_c9_g5_i2:105-803(+)	SRR8017_TRINITY_DN24969_c9_g5::SRR8017_TRINITY_DN24969_c9_g5_i2::g.108983::m.108983	IS_216438_Aes_Gill_Mucus_lane_Pann_DB	1	0.00023045	4	5	6	0.185345	27 kDa
SRR1330_TRINITY_DN115695_c12_g1::SRR1330_TRINITY_DN115695_c12_g1_i4::g.239330::m.239330 [type:5prime_partial len:226 gc:universal SRR1330_TRINITY_DN115695_c12_g1_i4:1099-422(-)]	type:5prime_partial len:226 gc:universal SRR1330_TRINITY_DN115695_c12_g1_i4:1099-422(-)	SRR1330_TRINITY_DN115695_c12_g1::SRR1330_TRINITY_DN115695_c12_g1_i4::g.239330::m.239330	IS_216438_Aes_Gill_Mucus_lane_Pann_DB	1	0.000268858	5	5	7	0.275556	25 kDa
SRR7978_TRINITY_DN18621_c1_g1::SRR7978_TRINITY_DN18621_c1_g1_i1::g.32073::m.32073 [type:complete len:252 gc:universal SRR7978_TRINITY_DN18621_c1_g1_i1:3198-2443(-)]	type:complete len:252 gc:universal SRR7978_TRINITY_DN18621_c1_g1_i1:3198-2443(-)	SRR7978_TRINITY_DN18621_c1_g1::SRR7978_TRINITY_DN18621_c1_g1_i1::g.32073::m.32073	IS_216438_Aes_Gill_Mucus_lane_Pann_DB	1	0.000307267	3	3	8	0.219124	28 kDa
SRR7914_TRINITY_DN28925_c0_g3::SRR7914_TRINITY_DN28925_c0_g3_i1::g.22413::m.22413 [type:complete len:130 gc:universal SRR7914_TRINITY_DN28925_c0_g3_i1:4137-3748(-)]	type:5prime_partial len:324 gc:universal SRR1330_TRINITY_DN124781_c1_g1_i14:3-974(+)	SRR1330_TRINITY_DN124781_c1_g1::SRR1330_TRINITY_DN124781_c1_g1_i14::g.225174::m.225174	IS_216438_Aes_Gill_Mucus_lane_Pann_DB	1	0.000537717	2	3	14	0.120743	34 kDa
SRR8017_TRINITY_DN26300_c0_g1::SRR8017_TRINITY_DN26300_c0_g1_i8::g.112678::m.112678 [type:complete len:148 gc:universal SRR8017_TRINITY_DN26300_c0_g1_i8:730-287(-)]	type:complete len:148 gc:universal SRR8021_TRINITY_DN19914_c0_g1_i2:122-565(+)	SRR8021_TRINITY_DN19914_c0_g1::SRR8021_TRINITY_DN19914_c0_g1_i2::g.160471::m.160471	IS_216438_Aes_Gill_Mucus_lane_Pann_DB	1	0.000345675	1	2	9	0.340136	16 kDa
SRR1330_TRINITY_DN230844_c0_g1::SRR1330_TRINITY_DN230844_c0_g1_i1::g.269195::m.269195 [type:internal len:195 gc:universal SRR1330_TRINITY_DN230844_c0_g1_i1:584-3(-)]	type:internal len:195 gc:universal SRR1330_TRINITY_DN230844_c0_g1_i1:584-3(-)	SRR1330_TRINITY_DN230844_c0_g1::SRR1330_TRINITY_DN230844_c0_g1_i1::g.269195::m.269195	IS_216438_Aes_Gill_Mucus_lane_Pann_DB	1	0.000153633	3	3	4	0.242268	21 kDa
SRR7980_TRINITY_DN13938_c0_g1::SRR7980_TRINITY_DN13938_c0_g1_i1::g.78805::m.78805 [type:complete len:165 gc:universal SRR7980_TRINITY_DN13938_c0_g1_i1:794-300(-)]	type:complete len:165 gc:universal SRR7980_TRINITY_DN13938_c0_g1_i1:794-300(-)	SRR7980_TRINITY_DN13938_c0_g1::SRR7980_TRINITY_DN13938_c0_g1_i1::g.78805::m.78805	IS_216438_Aes_Gill_Mucus_lane_Pann_DB	1	0.00023045	2	3	6	0.134146	18 kDa
SRR8020_TRINITY_DN29026_c3_g1::SRR8020_TRINITY_DN29026_c3_g1_i3::g.139507::m.139507 [type:complete len:250 gc:universal SRR8020_TRINITY_DN29026_c3_g1_i3:495-1244(+)]	type:complete len:250 gc:universal SRR8020_TRINITY_DN29026_c3_g1_i3:495-1244(+)	SRR8020_TRINITY_DN29026_c3_g1::SRR8020_TRINITY_DN29026_c3_g1_i3::g.139507::m.139507	IS_216438_Aes_Gill_Mucus_lane_Pann_DB	1	0.000345675	2	2	9	0.257028	28 kDa
SRR8017_TRINITY_DN26300_c0_g1::SRR8017_TRINITY_DN26300_c0_g1_i9::g.112680::m.112680 [type:complete len:148 gc:universal SRR8017_TRINITY_DN26300_c0_g1_i9:762-319(-)]	type:complete len:148 gc:universal SRR8017_TRINITY_DN26300_c0_g1_i9:762-319(-)	SRR8017_TRINITY_DN26300_c0_g1::SRR8017_TRINITY_DN26300_c0_g1_i9::g.112680::m.112680	IS_216438_Aes_Gill_Mucus_lane_Pann_DB	1	0.000345675	2	2	9	0.44898	16 kDa
SRR8020_TRINITY_DN28615_c0_g1::SRR8020_TRINITY_DN28615_c0_g1_i3::g.138012::m.138012 [type:complete len:143 gc:universal SRR8020_TRINITY_DN28615_c0_g1_i3:75-503(+)]	type:complete len:143 gc:universal SRR8020_TRINITY_DN28615_c0_g1_i3:75-503(+)	SRR8020_TRINITY_DN28615_c0_g1::SRR8020_TRINITY_DN28615_c0_g1_i3::g.138012::m.138012	IS_216438_Aes_Gill_Mucus_lane_Pann_DB	1	0.000576125	3	5	15	0.5	16 kDa
SRR7980_TRINITY_DN12577_c0_g1::SRR7980_TRINITY_DN12577_c0_g1_i2::g.91912::m.91912 [type:complete len:177 gc:universal SRR7980_TRINITY_DN12577_c0_g1_i2:254-784(+)]	type:complete len:177 gc:universal SRR7980_TRINITY_DN12577_c0_g1_i2:254-784(+)	SRR7980_TRINITY_DN12577_c0_g1::SRR7980_TRINITY_DN12577_c0_g1_i2::g.91912::m.91912	IS_216438_Aes_Gill_Mucus_lane_Pann_DB	1	0.000115225	3	3	3	0.221591	20 kDa
SRR7914_TRINITY_DN32278_c0_g1::SRR7914_TRINITY_DN32278_c0_g1_i2::g.20346::m.20346 [type:complete len:338 gc:universal SRR7914_TRINITY_DN32278_c0_g1_i2:184-1197(+)]	type:complete len:338 gc:universal SRR7914_TRINITY_DN32278_c0_g1_i2:184-1197(+)	SRR7914_TRINITY_DN32278_c0_g1::SRR7914_TRINITY_DN32278_c0_g1_i2::g.20346::m.20346	IS_216438_Aes_Gill_Mucus_lane_Pann_DB	1	0.000153633	3	3	4	0.106825	38 kDa
SRR1330_TRINITY_DN113623_c0_g1::SRR1330_TRINITY_DN113623_c0_g1_i1::g.255960::m.255960 [type:5prime_partial len:201 gc:universal SRR1330_TRINITY_DN113623_c0_g1_i1:845-243(-)]	type:5prime_partial len:201 gc:universal SRR1330_TRINITY_DN113623_c0_g1_i1:845-243(-)	SRR1330_TRINITY_DN113623_c0_g1::SRR1330_TRINITY_DN113623_c0_g1_i1::g.255960::m.255960	IS_216438_Aes_Gill_Mucus_lane_Pann_DB	1	0.000153633	2	3	4	0.17	22 kDa
SRR7978_TRINITY_DN17027_c0_g1::SRR7978_TRINITY_DN17027_c0_g1_i1::g.43901::m.43901 [type:complete len:337 gc:universal SRR7978_TRINITY_DN17027_c0_g1_i1:1911-901(-)]	type:complete len:337 gc:universal SRR7978_TRINITY_DN17027_c0_g1_i1:1911-901(-)	SRR7978_TRINITY_DN17027_c0_g1::SRR7978_TRINITY_DN17027_c0_g1_i1::g.43901::m.43901	IS_216438_Aes_Gill_Mucus_lane_Pann_DB	1	0.00023045	2	3	6	0.0803571	37 kDa
SRR7979_TRINITY_DN17762_c4_g3::SRR7979_TRINITY_DN17762_c4_g3_i3::g.62933::m.62933 [type:complete len:245 gc:universal SRR7979_TRINITY_DN17762_c4_g3_i3:2738-2004(-)]	type:complete len:245 gc:universal SRR7979_TRINITY_DN17762_c4_g3_i3:2738-2004(-)	SRR7979_TRINITY_DN17762_c4_g3::SRR7979_TRINITY_DN17762_c4_g3_i3::g.62933::m.62933	IS_216438_Aes_Gill_Mucus_lane_Pann_DB	1	0.00023045	2	2	6	0.168033	28 kDa
SRR8000_TRINITY_DN17460_c0_g1::SRR8000_TRINITY_DN17460_c0_g1_i1::g.97913::m.97913 [type:3prime_partial len:151 gc:universal SRR8000_TRINITY_DN17460_c0_g1_i1:452-3(-)]	type:5prime_partial len:405 gc:universal SRR1330_TRINITY_DN121695_c10_g1_i1:1451-237(-)	SRR1330_TRINITY_DN121695_c10_g1::SRR1330_TRINITY_DN121695_c10_g1_i1::g.213297::m.213297	IS_216438_Aes_Gill_Mucus_lane_Pann_DB	1	0.000844984	11	14	22	0.430693	45 kDa
SRR8020_TRINITY_DN30092_c0_g1::SRR8020_TRINITY_DN30092_c0_g1_i7::g.122208::m.122208 [type:complete len:131 gc:universal SRR8020_TRINITY_DN30092_c0_g1_i7:2629-3021(+)]	type:5prime_partial len:192 gc:universal SRR1329_TRINITY_DN354944_c3_g1_i6:697-122(-)	SRR1329_TRINITY_DN354944_c3_g1::SRR1329_TRINITY_DN354944_c3_g1_i6::g.184249::m.184249	IS_216438_Aes_Gill_Mucus_lane_Pann_DB	1	0.000345675	2	2	9	0.219895	20 kDa
SRR8017_TRINITY_DN25957_c5_g1::SRR8017_TRINITY_DN25957_c5_g1_i1::g.119706::m.119706 [type:complete len:726 gc:universal SRR8017_TRINITY_DN25957_c5_g1_i1:132-2309(+)]	type:complete len:726 gc:universal SRR8017_TRINITY_DN25957_c5_g1_i1:132-2309(+)	SRR8017_TRINITY_DN25957_c5_g1::SRR8017_TRINITY_DN25957_c5_g1_i1::g.119706::m.119706	IS_216438_Aes_Gill_Mucus_lane_Pann_DB	1	0.0004609	1	1	12	0.153103	80 kDa
SRR7979_TRINITY_DN16633_c0_g1::SRR7979_TRINITY_DN16633_c0_g1_i1::g.46114::m.46114 [type:complete len:522 gc:universal SRR7979_TRINITY_DN16633_c0_g1_i1:163-1728(+)]	type:complete len:522 gc:universal SRR7979_TRINITY_DN16633_c0_g1_i1:163-1728(+)	SRR7979_TRINITY_DN16633_c0_g1::SRR7979_TRINITY_DN16633_c0_g1_i1::g.46114::m.46114	IS_216438_Aes_Gill_Mucus_lane_Pann_DB	1	0.000537717	3	3	14	0.287908	56 kDa
SRR7914_TRINITY_DN30369_c2_g2::SRR7914_TRINITY_DN30369_c2_g2_i9::g.8016::m.8016 [type:complete len:107 gc:universal SRR7914_TRINITY_DN30369_c2_g2_i9:531-211(-)]	type:complete len:107 gc:universal SRR7914_TRINITY_DN30369_c2_g2_i9:531-211(-)	SRR7914_TRINITY_DN30369_c2_g2::SRR7914_TRINITY_DN30369_c2_g2_i9::g.8016::m.8016	IS_216438_Aes_Gill_Mucus_lane_Pann_DB	1	0.000115225	2	2	3	0.254717	12 kDa
SRR7914_TRINITY_DN41065_c0_g1::SRR7914_TRINITY_DN41065_c0_g1_i1::g.23775::m.23775 [type:complete len:228 gc:universal SRR7914_TRINITY_DN41065_c0_g1_i1:903-220(-)]	type:complete len:228 gc:universal SRR7914_TRINITY_DN41065_c0_g1_i1:903-220(-)	SRR7914_TRINITY_DN41065_c0_g1::SRR7914_TRINITY_DN41065_c0_g1_i1::g.23775::m.23775	IS_216438_Aes_Gill_Mucus_lane_Pann_DB	1	7.68167e-05	2	2	2	0.0881057	26 kDa
SRR1330_TRINITY_DN296737_c0_g1::SRR1330_TRINITY_DN296737_c0_g1_i1::g.267488::m.267488 [type:internal len:277 gc:universal SRR1330_TRINITY_DN296737_c0_g1_i1:2-829(+)]	type:internal len:277 gc:universal SRR1330_TRINITY_DN296737_c0_g1_i1:2-829(+)	SRR1330_TRINITY_DN296737_c0_g1::SRR1330_TRINITY_DN296737_c0_g1_i1::g.267488::m.267488	IS_216438_Aes_Gill_Mucus_lane_Pann_DB	1	0.000192042	2	2	5	0.0869565	30 kDa
SRR8000_TRINITY_DN22079_c3_g4::SRR8000_TRINITY_DN22079_c3_g4_i11::g.100623::m.100623 [type:complete len:359 gc:universal SRR8000_TRINITY_DN22079_c3_g4_i11:532-1608(+)]	type:complete len:473 gc:universal SRR1329_TRINITY_DN355673_c6_g1_i24:134-1552(+)	SRR1329_TRINITY_DN355673_c6_g1::SRR1329_TRINITY_DN355673_c6_g1_i24::g.174700::m.174700	IS_216438_Aes_Gill_Mucus_lane_Pann_DB	1	7.68167e-05	2	2	2	0.0487288	54 kDa
SRR7979_TRINITY_DN17453_c4_g1::SRR7979_TRINITY_DN17453_c4_g1_i1::g.57794::m.57794 [type:complete len:324 gc:universal SRR7979_TRINITY_DN17453_c4_g1_i1:233-1204(+)]	type:complete len:324 gc:universal SRR7979_TRINITY_DN17453_c4_g1_i1:233-1204(+)	SRR7979_TRINITY_DN17453_c4_g1::SRR7979_TRINITY_DN17453_c4_g1_i1::g.57794::m.57794	IS_216438_Aes_Gill_Mucus_lane_Pann_DB	1	0.000153633	2	2	4	0.126935	36 kDa
SRR8017_TRINITY_DN26300_c0_g1::SRR8017_TRINITY_DN26300_c0_g1_i8::g.112678::m.112678 [type:complete len:148 gc:universal SRR8017_TRINITY_DN26300_c0_g1_i8:730-287(-)]	type:complete len:148 gc:universal SRR8017_TRINITY_DN26300_c0_g1_i8:730-287(-)	SRR8017_TRINITY_DN26300_c0_g1::SRR8017_TRINITY_DN26300_c0_g1_i8::g.112678::m.112678	IS_216438_Aes_Gill_Mucus_lane_Pann_DB	1	0.00023045	2	2	6	0.353741	16 kDa
SRR7978_TRINITY_DN16429_c0_g1::SRR7978_TRINITY_DN16429_c0_g1_i2::g.44517::m.44517 [type:complete len:250 gc:universal SRR7978_TRINITY_DN16429_c0_g1_i2:1513-764(-)]	type:complete len:250 gc:universal SRR7978_TRINITY_DN16429_c0_g1_i2:1513-764(-)	SRR7978_TRINITY_DN16429_c0_g1::SRR7978_TRINITY_DN16429_c0_g1_i2::g.44517::m.44517	IS_216438_Aes_Gill_Mucus_lane_Pann_DB	1	7.68167e-05	2	2	2	0.100402	27 kDa
SRR8017_TRINITY_DN50016_c0_g1::SRR8017_TRINITY_DN50016_c0_g1_i1::g.102936::m.102936 [type:internal len:122 gc:universal SRR8017_TRINITY_DN50016_c0_g1_i1:3-365(+)]	type:internal len:122 gc:universal SRR8017_TRINITY_DN50016_c0_g1_i1:3-365(+)	SRR8017_TRINITY_DN50016_c0_g1::SRR8017_TRINITY_DN50016_c0_g1_i1::g.102936::m.102936	IS_216438_Aes_Gill_Mucus_lane_Pann_DB	1	0.000153633	2	2	4	0.22314	13 kDa
SRR7979_TRINITY_DN16397_c0_g1::SRR7979_TRINITY_DN16397_c0_g1_i1::g.46536::m.46536 [type:complete len:127 gc:universal SRR7979_TRINITY_DN16397_c0_g1_i1:864-484(-)]	type:complete len:127 gc:universal SRR7979_TRINITY_DN16397_c0_g1_i1:864-484(-)	SRR7979_TRINITY_DN16397_c0_g1::SRR7979_TRINITY_DN16397_c0_g1_i1::g.46536::m.46536	IS_216438_Aes_Gill_Mucus_lane_Pann_DB	1	0.000422492	1	2	11	0.357143	14 kDa
SRR7978_TRINITY_DN17891_c1_g1::SRR7978_TRINITY_DN17891_c1_g1_i2::g.28078::m.28078 [type:5prime_partial len:266 gc:universal SRR7978_TRINITY_DN17891_c1_g1_i2:1-798(+)]	type:complete len:429 gc:universal SRR7980_TRINITY_DN16795_c0_g1_i1:93-1379(+)	SRR7980_TRINITY_DN16795_c0_g1::SRR7980_TRINITY_DN16795_c0_g1_i1::g.71453::m.71453	IS_216438_Aes_Gill_Mucus_lane_Pann_DB	1	0.000384084	2	2	10	0.147196	48 kDa
SRR8020_TRINITY_DN27793_c1_g3::SRR8020_TRINITY_DN27793_c1_g3_i2::g.131334::m.131334 [type:complete len:335 gc:universal SRR8020_TRINITY_DN27793_c1_g3_i2:4133-3129(-)]	type:complete len:335 gc:universal SRR8020_TRINITY_DN27793_c1_g3_i2:4133-3129(-)	SRR8020_TRINITY_DN27793_c1_g3::SRR8020_TRINITY_DN27793_c1_g3_i2::g.131334::m.131334	IS_216438_Aes_Gill_Mucus_lane_Pann_DB	1	0.000192042	3	3	5	0.110778	37 kDa
SRR1330_TRINITY_DN119803_c0_g1::SRR1330_TRINITY_DN119803_c0_g1_i4::g.220572::m.220572 [type:internal len:1296 gc:universal SRR1330_TRINITY_DN119803_c0_g1_i4:3887-3(-)]	type:internal len:1296 gc:universal SRR1330_TRINITY_DN119803_c0_g1_i4:3887-3(-)	SRR1330_TRINITY_DN119803_c0_g1::SRR1330_TRINITY_DN119803_c0_g1_i4::g.220572::m.220572	IS_216438_Aes_Gill_Mucus_lane_Pann_DB	1	0.000960209	17	17	25	0.166795	143 kDa
SRR1330_TRINITY_DN120434_c0_g1::SRR1330_TRINITY_DN120434_c0_g1_i2::g.255521::m.255521 [type:complete len:521 gc:universal SRR1330_TRINITY_DN120434_c0_g1_i2:290-1852(+)]	type:complete len:521 gc:universal SRR1330_TRINITY_DN120434_c0_g1_i2:290-1852(+)	SRR1330_TRINITY_DN120434_c0_g1::SRR1330_TRINITY_DN120434_c0_g1_i2::g.255521::m.255521	IS_216438_Aes_Gill_Mucus_lane_Pann_DB	1	0.000384084	1	1	10	0.159615	56 kDa
SRR8021_TRINITY_DN20653_c0_g3::SRR8021_TRINITY_DN20653_c0_g3_i1::g.157859::m.157859 [type:complete len:195 gc:universal SRR8021_TRINITY_DN20653_c0_g3_i1:134-718(+)]	type:complete len:195 gc:universal SRR8021_TRINITY_DN20653_c0_g3_i1:134-718(+)	SRR8021_TRINITY_DN20653_c0_g3::SRR8021_TRINITY_DN20653_c0_g3_i1::g.157859::m.157859	IS_216438_Aes_Gill_Mucus_lane_Pann_DB	1	0.000345675	2	2	9	0.0927835	22 kDa
SRR7978_TRINITY_DN17895_c1_g1::SRR7978_TRINITY_DN17895_c1_g1_i2::g.28121::m.28121 [type:complete len:184 gc:universal SRR7978_TRINITY_DN17895_c1_g1_i2:744-1295(+)]	type:complete len:170 gc:universal SRR1329_TRINITY_DN355519_c3_g3_i5:739-230(-)	SRR1329_TRINITY_DN355519_c3_g3::SRR1329_TRINITY_DN355519_c3_g3_i5::g.173276::m.173276	IS_216438_Aes_Gill_Mucus_lane_Pann_DB	1	0.000115225	2	2	3	0.236686	19 kDa
SRR1329_TRINITY_DN355668_c2_g4::SRR1329_TRINITY_DN355668_c2_g4_i10::g.174675::m.174675 [type:internal len:104 gc:universal SRR1329_TRINITY_DN355668_c2_g4_i10:311-3(-)]	type:complete len:275 gc:universal SRR7980_TRINITY_DN17505_c0_g1_i1:180-1004(+)	SRR7980_TRINITY_DN17505_c0_g1::SRR7980_TRINITY_DN17505_c0_g1_i1::g.74822::m.74822	IS_216438_Aes_Gill_Mucus_lane_Pann_DB	1	0.000384084	5	5	10	0.310219	30 kDa
SRR7980_TRINITY_DN14362_c0_g1::SRR7980_TRINITY_DN14362_c0_g1_i2::g.71295::m.71295 [type:complete len:370 gc:universal SRR7980_TRINITY_DN14362_c0_g1_i2:1458-349(-)]	type:complete len:370 gc:universal SRR7980_TRINITY_DN14362_c0_g1_i2:1458-349(-)	SRR7980_TRINITY_DN14362_c0_g1::SRR7980_TRINITY_DN14362_c0_g1_i2::g.71295::m.71295	IS_216438_Aes_Gill_Mucus_lane_Pann_DB	1	7.68167e-05	2	2	2	0.0813008	42 kDa
SRR8017_TRINITY_DN26185_c5_g3::SRR8017_TRINITY_DN26185_c5_g3_i16::g.120759::m.120759 [type:complete len:329 gc:universal SRR8017_TRINITY_DN26185_c5_g3_i16:1948-2934(+)]	type:complete len:390 gc:universal SRR7978_TRINITY_DN20192_c1_g1_i7:1639-470(-)	SRR7978_TRINITY_DN20192_c1_g1::SRR7978_TRINITY_DN20192_c1_g1_i7::g.40128::m.40128	IS_216438_Aes_Gill_Mucus_lane_Pann_DB	1	0.00023045	2	2	6	0.18509	43 kDa
SRR7979_TRINITY_DN18043_c0_g1::SRR7979_TRINITY_DN18043_c0_g1_i2::g.68178::m.68178 [type:complete len:387 gc:universal SRR7979_TRINITY_DN18043_c0_g1_i2:253-1413(+)]	type:complete len:350 gc:universal SRR7978_TRINITY_DN5299_c0_g1_i1:1273-224(-)	SRR7978_TRINITY_DN5299_c0_g1::SRR7978_TRINITY_DN5299_c0_g1_i1::g.25945::m.25945	IS_216438_Aes_Gill_Mucus_lane_Pann_DB	1	7.68167e-05	2	2	2	0.0687679	39 kDa
SRR7978_TRINITY_DN20130_c4_g1::SRR7978_TRINITY_DN20130_c4_g1_i2::g.40103::m.40103 [type:complete len:354 gc:universal SRR7978_TRINITY_DN20130_c4_g1_i2:204-1265(+)]	type:complete len:313 gc:universal SRR8000_TRINITY_DN21975_c5_g3_i1:419-1357(+)	SRR8000_TRINITY_DN21975_c5_g3::SRR8000_TRINITY_DN21975_c5_g3_i1::g.98680::m.98680	IS_216438_Aes_Gill_Mucus_lane_Pann_DB	1	0.000153633	2	2	4	0.141026	35 kDa
sp|CAS1_BOVIN| [sp|CAS1_BOVIN|]	sp|CAS1_BOVIN|	sp|CAS1_BOVIN|	IS_216438_Aes_Gill_Mucus_lane_Pann_DB	1	7.68167e-05	2	2	2	0.102804	25 kDa
SRR7979_TRINITY_DN18918_c1_g1::SRR7979_TRINITY_DN18918_c1_g1_i1::g.56855::m.56855 [type:complete len:202 gc:universal SRR7979_TRINITY_DN18918_c1_g1_i1:1163-558(-)]	type:complete len:202 gc:universal SRR7979_TRINITY_DN18918_c1_g1_i1:1163-558(-)	SRR7979_TRINITY_DN18918_c1_g1::SRR7979_TRINITY_DN18918_c1_g1_i1::g.56855::m.56855	IS_216438_Aes_Gill_Mucus_lane_Pann_DB	0.99	7.68167e-05	2	2	2	0.109453	22 kDa
SRR8017_TRINITY_DN36970_c0_g1::SRR8017_TRINITY_DN36970_c0_g1_i1::g.116481::m.116481 [type:internal len:140 gc:universal SRR8017_TRINITY_DN36970_c0_g1_i1:3-419(+)]	type:internal len:140 gc:universal SRR8017_TRINITY_DN36970_c0_g1_i1:3-419(+)	SRR8017_TRINITY_DN36970_c0_g1::SRR8017_TRINITY_DN36970_c0_g1_i1::g.116481::m.116481	IS_216438_Aes_Gill_Mucus_lane_Pann_DB	1	7.68167e-05	1	1	2	0.194245	14 kDa
SRR1330_TRINITY_DN123871_c0_g5::SRR1330_TRINITY_DN123871_c0_g5_i2::g.209378::m.209378 [type:complete len:377 gc:universal SRR1330_TRINITY_DN123871_c0_g5_i2:1904-774(-)]	type:complete len:378 gc:universal SRR7914_TRINITY_DN32483_c1_g1_i4:62-1195(+)	SRR7914_TRINITY_DN32483_c1_g1::SRR7914_TRINITY_DN32483_c1_g1_i4::g.4238::m.4238	IS_216438_Aes_Gill_Mucus_lane_Pann_DB	1	0.0023045	1	1	60	0.604775	42 kDa
SRR7978_TRINITY_DN19342_c1_g2::SRR7978_TRINITY_DN19342_c1_g2_i2::g.40817::m.40817 [type:complete len:260 gc:universal SRR7978_TRINITY_DN19342_c1_g2_i2:212-991(+)]	type:complete len:260 gc:universal SRR7978_TRINITY_DN19342_c1_g2_i2:212-991(+)	SRR7978_TRINITY_DN19342_c1_g2::SRR7978_TRINITY_DN19342_c1_g2_i2::g.40817::m.40817	IS_216438_Aes_Gill_Mucus_lane_Pann_DB	1	0.000153633	3	3	4	0.138996	29 kDa
SRR8017_TRINITY_DN26467_c1_g2::SRR8017_TRINITY_DN26467_c1_g2_i2::g.104747::m.104747 [type:5prime_partial len:164 gc:universal SRR8017_TRINITY_DN26467_c1_g2_i2:3-494(+)]	type:complete len:124 gc:universal SRR8000_TRINITY_DN22304_c3_g2_i2:946-1317(+)	SRR8000_TRINITY_DN22304_c3_g2::SRR8000_TRINITY_DN22304_c3_g2_i2::g.95904::m.95904	IS_216438_Aes_Gill_Mucus_lane_Pann_DB	1	0.000268858	3	3	7	0.333333	13 kDa
SRR1330_TRINITY_DN123887_c1_g5::SRR1330_TRINITY_DN123887_c1_g5_i3::g.209109::m.209109 [type:internal len:726 gc:universal SRR1330_TRINITY_DN123887_c1_g5_i3:2176-2(-)]	type:internal len:726 gc:universal SRR1330_TRINITY_DN123887_c1_g5_i3:2176-2(-)	SRR1330_TRINITY_DN123887_c1_g5::SRR1330_TRINITY_DN123887_c1_g5_i3::g.209109::m.209109	IS_216438_Aes_Gill_Mucus_lane_Pann_DB	1	0.00023045	5	6	6	0.104828	78 kDa
sp|K1C15_SHEEP| [sp|K1C15_SHEEP|]	sp|K1C15_SHEEP|	sp|K1C15_SHEEP|	IS_216438_Aes_Gill_Mucus_lane_Pann_DB	1	0.0004609	1	1	12	0.0883002	49 kDa
SRR7979_TRINITY_DN12748_c0_g1::SRR7979_TRINITY_DN12748_c0_g1_i1::g.63450::m.63450 [type:complete len:294 gc:universal SRR7979_TRINITY_DN12748_c0_g1_i1:447-1328(+)]	type:3prime_partial len:232 gc:universal SRR1329_TRINITY_DN351935_c0_g1_i11:695-3(-)	SRR1329_TRINITY_DN351935_c0_g1::SRR1329_TRINITY_DN351935_c0_g1_i11::g.189287::m.189287	IS_216438_Aes_Gill_Mucus_lane_Pann_DB	1	0.000115225	2	2	3	0.0909091	26 kDa
SRR7914_TRINITY_DN29642_c2_g1::SRR7914_TRINITY_DN29642_c2_g1_i4::g.7334::m.7334 [type:complete len:237 gc:universal SRR7914_TRINITY_DN29642_c2_g1_i4:2128-1418(-)]	type:complete len:237 gc:universal SRR7914_TRINITY_DN29642_c2_g1_i4:2128-1418(-)	SRR7914_TRINITY_DN29642_c2_g1::SRR7914_TRINITY_DN29642_c2_g1_i4::g.7334::m.7334	IS_216438_Aes_Gill_Mucus_lane_Pann_DB	1	0.000115225	2	2	3	0.190678	26 kDa
SRR8000_TRINITY_DN17284_c0_g1::SRR8000_TRINITY_DN17284_c0_g1_i1::g.101006::m.101006 [type:5prime_partial len:370 gc:universal SRR8000_TRINITY_DN17284_c0_g1_i1:1401-292(-)]	type:5prime_partial len:370 gc:universal SRR8000_TRINITY_DN17284_c0_g1_i1:1401-292(-)	SRR8000_TRINITY_DN17284_c0_g1::SRR8000_TRINITY_DN17284_c0_g1_i1::g.101006::m.101006	IS_216438_Aes_Gill_Mucus_lane_Pann_DB	1	0.000268858	4	4	7	0.197832	42 kDa
SRR1330_TRINITY_DN117450_c14_g1::SRR1330_TRINITY_DN117450_c14_g1_i2::g.221645::m.221645 [type:complete len:299 gc:universal SRR1330_TRINITY_DN117450_c14_g1_i2:1263-367(-)]	type:complete len:299 gc:universal SRR1330_TRINITY_DN117450_c14_g1_i2:1263-367(-)	SRR1330_TRINITY_DN117450_c14_g1::SRR1330_TRINITY_DN117450_c14_g1_i2::g.221645::m.221645	IS_216438_Aes_Gill_Mucus_lane_Pann_DB	0.99	7.68167e-05	2	2	2	0.0771812	33 kDa
SRR1330_TRINITY_DN173149_c0_g1::SRR1330_TRINITY_DN173149_c0_g1_i1::g.237394::m.237394 [type:internal len:202 gc:universal SRR1330_TRINITY_DN173149_c0_g1_i1:604-2(-)]	type:internal len:202 gc:universal SRR1330_TRINITY_DN173149_c0_g1_i1:604-2(-)	SRR1330_TRINITY_DN173149_c0_g1::SRR1330_TRINITY_DN173149_c0_g1_i1::g.237394::m.237394	IS_216438_Aes_Gill_Mucus_lane_Pann_DB	1	0.000192042	3	3	5	0.199005	22 kDa
SRR1330_TRINITY_DN123871_c0_g5::SRR1330_TRINITY_DN123871_c0_g5_i2::g.209378::m.209378 [type:complete len:377 gc:universal SRR1330_TRINITY_DN123871_c0_g5_i2:1904-774(-)]	type:complete len:377 gc:universal SRR1330_TRINITY_DN123871_c0_g5_i2:1904-774(-)	SRR1330_TRINITY_DN123871_c0_g5::SRR1330_TRINITY_DN123871_c0_g5_i2::g.209378::m.209378	IS_216438_Aes_Gill_Mucus_lane_Pann_DB	1	0.00207405	0	0	54	0.484043	42 kDa
SRR1329_TRINITY_DN338962_c1_g1::SRR1329_TRINITY_DN338962_c1_g1_i1::g.192851::m.192851 [type:internal len:183 gc:universal SRR1329_TRINITY_DN338962_c1_g1_i1:548-3(-)]	type:5prime_partial len:469 gc:universal SRR8017_TRINITY_DN26716_c0_g3_i5:3-1409(+)	SRR8017_TRINITY_DN26716_c0_g3::SRR8017_TRINITY_DN26716_c0_g3_i5::g.112442::m.112442	IS_216438_Aes_Gill_Mucus_lane_Pann_DB	1	0.000345675	2	2	9	0.200855	51 kDa
SRR7978_TRINITY_DN19437_c4_g1::SRR7978_TRINITY_DN19437_c4_g1_i4::g.44894::m.44894 [type:complete len:253 gc:universal SRR7978_TRINITY_DN19437_c4_g1_i4:2447-1689(-)]	type:3prime_partial len:187 gc:universal SRR1329_TRINITY_DN353664_c0_g2_i1:559-2(-)	SRR1329_TRINITY_DN353664_c0_g2::SRR1329_TRINITY_DN353664_c0_g2_i1::g.166110::m.166110	IS_216438_Aes_Gill_Mucus_lane_Pann_DB	1	0.000115225	2	2	3	0.236559	21 kDa
SRR8000_TRINITY_DN17284_c0_g1::SRR8000_TRINITY_DN17284_c0_g1_i1::g.101006::m.101006 [type:5prime_partial len:370 gc:universal SRR8000_TRINITY_DN17284_c0_g1_i1:1401-292(-)]	type:internal len:139 gc:universal SRR8017_TRINITY_DN52995_c0_g1_i1:2-415(+)	SRR8017_TRINITY_DN52995_c0_g1::SRR8017_TRINITY_DN52995_c0_g1_i1::g.111177::m.111177	IS_216438_Aes_Gill_Mucus_lane_Pann_DB	1	0.000153633	1	1	4	0.311594	15 kDa
SRR7914_TRINITY_DN19228_c0_g1::SRR7914_TRINITY_DN19228_c0_g1_i1::g.9787::m.9787 [type:complete len:111 gc:universal SRR7914_TRINITY_DN19228_c0_g1_i1:495-163(-)]	type:complete len:111 gc:universal SRR7914_TRINITY_DN19228_c0_g1_i1:495-163(-)	SRR7914_TRINITY_DN19228_c0_g1::SRR7914_TRINITY_DN19228_c0_g1_i1::g.9787::m.9787	IS_216438_Aes_Gill_Mucus_lane_Pann_DB	1	0.000153633	4	4	4	0.409091	12 kDa
SRR1330_TRINITY_DN123871_c0_g5::SRR1330_TRINITY_DN123871_c0_g5_i2::g.209378::m.209378 [type:complete len:377 gc:universal SRR1330_TRINITY_DN123871_c0_g5_i2:1904-774(-)]	type:complete len:378 gc:universal SRR7978_TRINITY_DN18397_c1_g4_i1:1389-256(-)	SRR7978_TRINITY_DN18397_c1_g4::SRR7978_TRINITY_DN18397_c1_g4_i1::g.26834::m.26834	IS_216438_Aes_Gill_Mucus_lane_Pann_DB	1	0.00122907	1	1	32	0.30504	42 kDa
SRR1330_TRINITY_DN123887_c1_g4::SRR1330_TRINITY_DN123887_c1_g4_i1::g.209106::m.209106 [type:3prime_partial len:606 gc:universal SRR1330_TRINITY_DN123887_c1_g4_i1:1817-3(-)]	type:3prime_partial len:606 gc:universal SRR1330_TRINITY_DN123887_c1_g4_i1:1817-3(-)	SRR1330_TRINITY_DN123887_c1_g4::SRR1330_TRINITY_DN123887_c1_g4_i1::g.209106::m.209106	IS_216438_Aes_Gill_Mucus_lane_Pann_DB	1	0.000153633	2	2	4	0.0727273	66 kDa
SRR8017_TRINITY_DN23965_c0_g1::SRR8017_TRINITY_DN23965_c0_g1_i4::g.109272::m.109272 [type:internal len:673 gc:universal SRR8017_TRINITY_DN23965_c0_g1_i4:2017-2(-)]	type:internal len:673 gc:universal SRR8017_TRINITY_DN23965_c0_g1_i4:2017-2(-)	SRR8017_TRINITY_DN23965_c0_g1::SRR8017_TRINITY_DN23965_c0_g1_i4::g.109272::m.109272	IS_216438_Aes_Gill_Mucus_lane_Pann_DB	1	7.68167e-05	2	2	2	0.0357143	71 kDa
SRR7979_TRINITY_DN18735_c5_g2::SRR7979_TRINITY_DN18735_c5_g2_i1::g.55245::m.55245-DECOY [type:complete len:586 gc:universal SRR7979_TRINITY_DN18735_c5_g2_i1:3053-1296(-)]	type:complete len:367 gc:universal SRR8017_TRINITY_DN25122_c2_g1_i3:54-1154(+)	SRR8017_TRINITY_DN25122_c2_g1::SRR8017_TRINITY_DN25122_c2_g1_i3::g.107918::m.107918	IS_216438_Aes_Gill_Mucus_lane_Pann_DB	1	7.68167e-05	2	2	2	0.0355191	40 kDa
sp|ALBU_BOVIN| [sp|ALBU_BOVIN|]	sp|ALBU_BOVIN|	sp|ALBU_BOVIN|	IS_216438_Aes_Skin_Mucus_band_Pann_DB	1	0.000533713	4	5	6	0.0856672	69 kDa
SRR7978_TRINITY_DN19380_c1_g1::SRR7978_TRINITY_DN19380_c1_g1_i3::g.40942::m.40942 [type:complete len:104 gc:universal SRR7978_TRINITY_DN19380_c1_g1_i3:156-467(+)]	type:5prime_partial len:128 gc:universal SRR1329_TRINITY_DN353425_c12_g2_i10:543-160(-)	SRR1329_TRINITY_DN353425_c12_g2::SRR1329_TRINITY_DN353425_c12_g2_i10::g.167703::m.167703	IS_216438_Aes_Skin_Mucus_band_Pann_DB	1	0.0249066	16	31	280	0.551181	14 kDa
SRR7978_TRINITY_DN14411_c1_g1::SRR7978_TRINITY_DN14411_c1_g1_i2::g.31295::m.31295 [type:5prime_partial len:252 gc:universal SRR7978_TRINITY_DN14411_c1_g1_i2:1674-919(-)]	type:5prime_partial len:252 gc:universal SRR7978_TRINITY_DN14411_c1_g1_i2:1674-919(-)	SRR7978_TRINITY_DN14411_c1_g1::SRR7978_TRINITY_DN14411_c1_g1_i2::g.31295::m.31295	IS_216438_Aes_Skin_Mucus_band_Pann_DB	1	0.000978474	8	10	11	0.422311	28 kDa
sp|K2C1_HUMAN| [sp|K2C1_HUMAN|]	sp|K2C1_HUMAN|	sp|K2C1_HUMAN|	IS_216438_Aes_Skin_Mucus_band_Pann_DB	1	0.00275752	18	19	31	0.339036	66 kDa
sp|K1C9_HUMAN| [sp|K1C9_HUMAN|]	sp|K1C9_HUMAN|	sp|K1C9_HUMAN|	IS_216438_Aes_Skin_Mucus_band_Pann_DB	1	0.00302437	18	20	34	0.420546	62 kDa
sp|K1C10_HUMAN| [sp|K1C10_HUMAN|]	sp|K1C10_HUMAN|	sp|K1C10_HUMAN|	IS_216438_Aes_Skin_Mucus_band_Pann_DB	1	0.00266856	15	16	30	0.296796	60 kDa
SRR7980_TRINITY_DN18311_c3_g1::SRR7980_TRINITY_DN18311_c3_g1_i1::g.72213::m.72213 [type:complete len:243 gc:universal SRR7980_TRINITY_DN18311_c3_g1_i1:6206-5478(-)]	type:complete len:243 gc:universal SRR7980_TRINITY_DN18311_c3_g1_i1:6206-5478(-)	SRR7980_TRINITY_DN18311_c3_g1::SRR7980_TRINITY_DN18311_c3_g1_i1::g.72213::m.72213	IS_216438_Aes_Skin_Mucus_band_Pann_DB	1	0.0022238	8	13	25	0.305785	28 kDa
SRR7978_TRINITY_DN14411_c1_g3::SRR7978_TRINITY_DN14411_c1_g3_i1::g.31296::m.31296 [type:internal len:171 gc:universal SRR7978_TRINITY_DN14411_c1_g3_i1:3-512(+)]	type:internal len:171 gc:universal SRR7978_TRINITY_DN14411_c1_g3_i1:3-512(+)	SRR7978_TRINITY_DN14411_c1_g3::SRR7978_TRINITY_DN14411_c1_g3_i1::g.31296::m.31296	IS_216438_Aes_Skin_Mucus_band_Pann_DB	1	0.000711617	3	4	8	0.223529	19 kDa
sp|K2C1_HUMAN| [sp|K2C1_HUMAN|]	sp|K22E_HUMAN|	sp|K22E_HUMAN|	IS_216438_Aes_Skin_Mucus_band_Pann_DB	1	0.00160114	11	12	18	0.268217	66 kDa
sp|TRYP_PIG| [sp|TRYP_PIG|]	sp|TRYP_PIG|	sp|TRYP_PIG|	IS_216438_Aes_Skin_Mucus_band_Pann_DB	1	0.00231276	4	5	26	0.251082	24 kDa
SRR8017_TRINITY_DN50100_c0_g1::SRR8017_TRINITY_DN50100_c0_g1_i1::g.120442::m.120442 [type:complete len:720 gc:universal SRR8017_TRINITY_DN50100_c0_g1_i1:2330-171(-)]	type:complete len:720 gc:universal SRR8017_TRINITY_DN50100_c0_g1_i1:2330-171(-)	SRR8017_TRINITY_DN50100_c0_g1::SRR8017_TRINITY_DN50100_c0_g1_i1::g.120442::m.120442	IS_216438_Aes_Skin_Mucus_band_Pann_DB	1	0.000978474	7	9	11	0.107093	82 kDa
SRR1330_TRINITY_DN124479_c0_g1::SRR1330_TRINITY_DN124479_c0_g1_i2::g.230239::m.230239 [type:complete len:154 gc:universal SRR1330_TRINITY_DN124479_c0_g1_i2:649-188(-)]	type:complete len:686 gc:universal SRR1330_TRINITY_DN124479_c0_g1_i6:2245-188(-)	SRR1330_TRINITY_DN124479_c0_g1::SRR1330_TRINITY_DN124479_c0_g1_i6::g.230241::m.230241	IS_216438_Aes_Skin_Mucus_band_Pann_DB	1	0.000444761	2	3	5	0.0481752	77 kDa
SRR7914_TRINITY_DN29934_c0_g1::SRR7914_TRINITY_DN29934_c0_g1_i7::g.10782::m.10782 [type:complete len:335 gc:universal SRR7914_TRINITY_DN29934_c0_g1_i7:266-1270(+)]	type:complete len:335 gc:universal SRR7914_TRINITY_DN29934_c0_g1_i7:266-1270(+)	SRR7914_TRINITY_DN29934_c0_g1::SRR7914_TRINITY_DN29934_c0_g1_i7::g.10782::m.10782	IS_216438_Aes_Skin_Mucus_band_Pann_DB	1	0.000266856	2	2	3	0.0808383	36 kDa
SRR7914_TRINITY_DN29932_c6_g3::SRR7914_TRINITY_DN29932_c6_g3_i1::g.10467::m.10467 [type:3prime_partial len:303 gc:universal SRR7914_TRINITY_DN29932_c6_g3_i1:462-1367(+)]	type:complete len:436 gc:universal SRR8000_TRINITY_DN20528_c0_g1_i1:264-1571(+)	SRR8000_TRINITY_DN20528_c0_g1::SRR8000_TRINITY_DN20528_c0_g1_i1::g.99850::m.99850	IS_216438_Aes_Skin_Mucus_band_Pann_DB	1	0.000177904	2	2	2	0.0413793	47 kDa
SRR1330_TRINITY_DN116543_c0_g1::SRR1330_TRINITY_DN116543_c0_g1_i2::g.206660::m.206660 [type:5prime_partial len:349 gc:universal SRR1330_TRINITY_DN116543_c0_g1_i2:1969-923(-)]	type:5prime_partial len:349 gc:universal SRR1330_TRINITY_DN116543_c0_g1_i2:1969-923(-)	SRR1330_TRINITY_DN116543_c0_g1::SRR1330_TRINITY_DN116543_c0_g1_i2::g.206660::m.206660	IS_216438_Aes_Skin_Mucus_band_Pann_DB	1	0.000355809	2	2	4	0.103448	39 kDa
SRR1330_TRINITY_DN114860_c0_g1::SRR1330_TRINITY_DN114860_c0_g1_i3::g.229783::m.229783 [type:complete len:121 gc:universal SRR1330_TRINITY_DN114860_c0_g1_i3:63-425(+)]	type:complete len:121 gc:universal SRR1330_TRINITY_DN114860_c0_g1_i3:63-425(+)	SRR1330_TRINITY_DN114860_c0_g1::SRR1330_TRINITY_DN114860_c0_g1_i3::g.229783::m.229783	IS_216438_Aes_Skin_Mucus_band_Pann_DB	1	0.000711617	5	7	8	0.516667	14 kDa
SRR7980_TRINITY_DN18366_c7_g1::SRR7980_TRINITY_DN18366_c7_g1_i4::g.72275::m.72275 [type:5prime_partial len:153 gc:universal SRR7980_TRINITY_DN18366_c7_g1_i4:1-459(+)]	type:5prime_partial len:153 gc:universal SRR7980_TRINITY_DN18366_c7_g1_i4:1-459(+)	SRR7980_TRINITY_DN18366_c7_g1::SRR7980_TRINITY_DN18366_c7_g1_i4::g.72275::m.72275	IS_216438_Aes_Skin_Mucus_band_Pann_DB	1	0.00284647	2	4	32	0.401316	17 kDa
SRR7914_TRINITY_DN28680_c0_g1::SRR7914_TRINITY_DN28680_c0_g1_i1::g.14783::m.14783 [type:internal len:271 gc:universal SRR7914_TRINITY_DN28680_c0_g1_i1:3-812(+)]	type:internal len:501 gc:universal SRR7914_TRINITY_DN28680_c0_g1_i2:3-1502(+)	SRR7914_TRINITY_DN28680_c0_g1::SRR7914_TRINITY_DN28680_c0_g1_i2::g.14784::m.14784	IS_216438_Aes_Skin_Mucus_band_Pann_DB	1	0.000889521	2	2	10	0.15	53 kDa
SRR8020_TRINITY_DN29716_c2_g2::SRR8020_TRINITY_DN29716_c2_g2_i1::g.132635::m.132635 [type:complete len:152 gc:universal SRR8020_TRINITY_DN29716_c2_g2_i1:848-393(-)]	type:5prime_partial len:178 gc:universal SRR8000_TRINITY_DN21703_c8_g3_i2:3-536(+)	SRR8000_TRINITY_DN21703_c8_g3::SRR8000_TRINITY_DN21703_c8_g3_i2::g.94394::m.94394	IS_216438_Aes_Skin_Mucus_band_Pann_DB	1	0.00133428	6	8	15	0.40113	20 kDa
SRR7914_TRINITY_DN32362_c3_g4::SRR7914_TRINITY_DN32362_c3_g4_i2::g.2808::m.2808 [type:complete len:556 gc:universal SRR7914_TRINITY_DN32362_c3_g4_i2:342-2009(+)]	type:complete len:556 gc:universal SRR7914_TRINITY_DN32362_c3_g4_i2:342-2009(+)	SRR7914_TRINITY_DN32362_c3_g4::SRR7914_TRINITY_DN32362_c3_g4_i2::g.2808::m.2808	IS_216438_Aes_Skin_Mucus_band_Pann_DB	1	0.000444761	2	3	5	0.0576577	62 kDa
SRR8017_TRINITY_DN6677_c0_g1::SRR8017_TRINITY_DN6677_c0_g1_i1::g.113437::m.113437 [type:complete len:106 gc:universal SRR8017_TRINITY_DN6677_c0_g1_i1:371-688(+)]	type:complete len:106 gc:universal SRR8017_TRINITY_DN6677_c0_g1_i1:371-688(+)	SRR8017_TRINITY_DN6677_c0_g1::SRR8017_TRINITY_DN6677_c0_g1_i1::g.113437::m.113437	IS_216438_Aes_Skin_Mucus_band_Pann_DB	1	0.00133428	7	13	15	0.714286	12 kDa
SRR7978_TRINITY_DN39042_c0_g1::SRR7978_TRINITY_DN39042_c0_g1_i1::g.39245::m.39245 [type:internal len:116 gc:universal SRR7978_TRINITY_DN39042_c0_g1_i1:1-345(+)]	type:internal len:116 gc:universal SRR7978_TRINITY_DN39042_c0_g1_i1:1-345(+)	SRR7978_TRINITY_DN39042_c0_g1::SRR7978_TRINITY_DN39042_c0_g1_i1::g.39245::m.39245	IS_216438_Aes_Skin_Mucus_band_Pann_DB	1	0.000622665	3	5	7	0.234783	12 kDa
SRR8017_TRINITY_DN23749_c0_g1::SRR8017_TRINITY_DN23749_c0_g1_i1::g.111860::m.111860 [type:complete len:163 gc:universal SRR8017_TRINITY_DN23749_c0_g1_i1:1444-956(-)]	type:complete len:163 gc:universal SRR8017_TRINITY_DN23749_c0_g1_i1:1444-956(-)	SRR8017_TRINITY_DN23749_c0_g1::SRR8017_TRINITY_DN23749_c0_g1_i1::g.111860::m.111860	IS_216438_Aes_Skin_Mucus_band_Pann_DB	1	0.000889521	7	8	10	0.487654	17 kDa
SRR8000_TRINITY_DN21697_c1_g2::SRR8000_TRINITY_DN21697_c1_g2_i3::g.100338::m.100338 [type:complete len:139 gc:universal SRR8000_TRINITY_DN21697_c1_g2_i3:4880-4464(-)]	type:complete len:139 gc:universal SRR8000_TRINITY_DN21697_c1_g2_i3:4880-4464(-)	SRR8000_TRINITY_DN21697_c1_g2::SRR8000_TRINITY_DN21697_c1_g2_i3::g.100338::m.100338	IS_216438_Aes_Skin_Mucus_band_Pann_DB	1	0.00275752	6	9	31	0.681159	15 kDa
SRR7914_TRINITY_DN28925_c0_g3::SRR7914_TRINITY_DN28925_c0_g3_i1::g.22413::m.22413 [type:complete len:130 gc:universal SRR7914_TRINITY_DN28925_c0_g3_i1:4137-3748(-)]	type:5prime_partial len:324 gc:universal SRR1330_TRINITY_DN124781_c1_g1_i14:3-974(+)	SRR1330_TRINITY_DN124781_c1_g1::SRR1330_TRINITY_DN124781_c1_g1_i14::g.225174::m.225174	IS_216438_Aes_Skin_Mucus_band_Pann_DB	1	0.00106743	1	2	12	0.151703	34 kDa
SRR7978_TRINITY_DN19890_c6_g1::SRR7978_TRINITY_DN19890_c6_g1_i1::g.36705::m.36705 [type:complete len:177 gc:universal SRR7978_TRINITY_DN19890_c6_g1_i1:605-75(-)]	type:complete len:177 gc:universal SRR7978_TRINITY_DN19890_c6_g1_i1:605-75(-)	SRR7978_TRINITY_DN19890_c6_g1::SRR7978_TRINITY_DN19890_c6_g1_i1::g.36705::m.36705	IS_216438_Aes_Skin_Mucus_band_Pann_DB	1	0.000355809	2	2	4	0.181818	20 kDa
SRR7980_TRINITY_DN18792_c4_g2::SRR7980_TRINITY_DN18792_c4_g2_i1::g.79454::m.79454 [type:complete len:109 gc:universal SRR7980_TRINITY_DN18792_c4_g2_i1:146-472(+)]	type:complete len:109 gc:universal SRR7980_TRINITY_DN18792_c4_g2_i1:146-472(+)	SRR7980_TRINITY_DN18792_c4_g2::SRR7980_TRINITY_DN18792_c4_g2_i1::g.79454::m.79454	IS_216438_Aes_Skin_Mucus_band_Pann_DB	1	0.000622665	3	5	7	0.555556	12 kDa
SRR7914_TRINITY_DN29703_c10_g7::SRR7914_TRINITY_DN29703_c10_g7_i1::g.10358::m.10358 [type:complete len:171 gc:universal SRR7914_TRINITY_DN29703_c10_g7_i1:1194-682(-)]	type:complete len:171 gc:universal SRR7914_TRINITY_DN29703_c10_g7_i1:1194-682(-)	SRR7914_TRINITY_DN29703_c10_g7::SRR7914_TRINITY_DN29703_c10_g7_i1::g.10358::m.10358	IS_216438_Aes_Skin_Mucus_band_Pann_DB	1	0.000444761	3	4	5	0.217647	19 kDa
SRR8021_TRINITY_DN6427_c0_g1::SRR8021_TRINITY_DN6427_c0_g1_i1::g.153632::m.153632 [type:complete len:134 gc:universal SRR8021_TRINITY_DN6427_c0_g1_i1:423-22(-)]	type:complete len:134 gc:universal SRR8021_TRINITY_DN6427_c0_g1_i1:423-22(-)	SRR8021_TRINITY_DN6427_c0_g1::SRR8021_TRINITY_DN6427_c0_g1_i1::g.153632::m.153632	IS_216438_Aes_Skin_Mucus_band_Pann_DB	1	0.000711617	5	7	8	0.330827	15 kDa
SRR8020_TRINITY_DN30092_c0_g1::SRR8020_TRINITY_DN30092_c0_g1_i7::g.122208::m.122208 [type:complete len:131 gc:universal SRR8020_TRINITY_DN30092_c0_g1_i7:2629-3021(+)]	type:5prime_partial len:192 gc:universal SRR1329_TRINITY_DN354944_c3_g1_i6:697-122(-)	SRR1329_TRINITY_DN354944_c3_g1::SRR1329_TRINITY_DN354944_c3_g1_i6::g.184249::m.184249	IS_216438_Aes_Skin_Mucus_band_Pann_DB	1	0.000266856	2	2	3	0.219895	20 kDa
SRR7914_TRINITY_DN30369_c2_g2::SRR7914_TRINITY_DN30369_c2_g2_i9::g.8016::m.8016 [type:complete len:107 gc:universal SRR7914_TRINITY_DN30369_c2_g2_i9:531-211(-)]	type:complete len:107 gc:universal SRR7914_TRINITY_DN30369_c2_g2_i9:531-211(-)	SRR7914_TRINITY_DN30369_c2_g2::SRR7914_TRINITY_DN30369_c2_g2_i9::g.8016::m.8016	IS_216438_Aes_Skin_Mucus_band_Pann_DB	1	0.000533713	4	4	6	0.424528	12 kDa
SRR7979_TRINITY_DN17782_c2_g2::SRR7979_TRINITY_DN17782_c2_g2_i4::g.63140::m.63140 [type:complete len:102 gc:universal SRR7979_TRINITY_DN17782_c2_g2_i4:311-616(+)]	type:complete len:102 gc:universal SRR7979_TRINITY_DN17782_c2_g2_i4:311-616(+)	SRR7979_TRINITY_DN17782_c2_g2::SRR7979_TRINITY_DN17782_c2_g2_i4::g.63140::m.63140	IS_216438_Aes_Skin_Mucus_band_Pann_DB	1	0.000622665	4	6	7	0.524752	11 kDa
SRR7979_TRINITY_DN16397_c0_g1::SRR7979_TRINITY_DN16397_c0_g1_i1::g.46536::m.46536 [type:complete len:127 gc:universal SRR7979_TRINITY_DN16397_c0_g1_i1:864-484(-)]	type:complete len:127 gc:universal SRR7979_TRINITY_DN16397_c0_g1_i1:864-484(-)	SRR7979_TRINITY_DN16397_c0_g1::SRR7979_TRINITY_DN16397_c0_g1_i1::g.46536::m.46536	IS_216438_Aes_Skin_Mucus_band_Pann_DB	1	0.00213485	1	1	24	0.436508	14 kDa
SRR7979_TRINITY_DN18638_c0_g6::SRR7979_TRINITY_DN18638_c0_g6_i1::g.53919::m.53919 [type:complete len:272 gc:universal SRR7979_TRINITY_DN18638_c0_g6_i1:225-1040(+)]	type:complete len:272 gc:universal SRR7979_TRINITY_DN18638_c0_g6_i1:225-1040(+)	SRR7979_TRINITY_DN18638_c0_g6::SRR7979_TRINITY_DN18638_c0_g6_i1::g.53919::m.53919	IS_216438_Aes_Skin_Mucus_band_Pann_DB	0.99	0.000355809	3	3	4	0.125461	29 kDa
SRR8021_TRINITY_DN36390_c0_g1::SRR8021_TRINITY_DN36390_c0_g1_i1::g.158516::m.158516 [type:complete len:103 gc:universal SRR8021_TRINITY_DN36390_c0_g1_i1:332-640(+)]	type:complete len:103 gc:universal SRR8017_TRINITY_DN25611_c6_g3_i3:1155-847(-)	SRR8017_TRINITY_DN25611_c6_g3::SRR8017_TRINITY_DN25611_c6_g3_i3::g.107852::m.107852	IS_216438_Aes_Skin_Mucus_band_Pann_DB	1	0.000533713	4	5	6	0.519608	12 kDa
SRR7978_TRINITY_DN19827_c1_g3::SRR7978_TRINITY_DN19827_c1_g3_i1::g.36789::m.36789 [type:complete len:581 gc:universal SRR7978_TRINITY_DN19827_c1_g3_i1:127-1869(+)]	type:complete len:581 gc:universal SRR7978_TRINITY_DN19827_c1_g3_i1:127-1869(+)	SRR7978_TRINITY_DN19827_c1_g3::SRR7978_TRINITY_DN19827_c1_g3_i1::g.36789::m.36789	IS_216438_Aes_Skin_Mucus_band_Pann_DB	1	0.000266856	3	3	3	0.0534483	63 kDa
SRR7978_TRINITY_DN33629_c0_g1::SRR7978_TRINITY_DN33629_c0_g1_i1::g.27982::m.27982 [type:5prime_partial len:169 gc:universal SRR7978_TRINITY_DN33629_c0_g1_i1:3-509(+)]	type:complete len:136 gc:universal SRR7978_TRINITY_DN195_c0_g1_i1:646-239(-)	SRR7978_TRINITY_DN195_c0_g1::SRR7978_TRINITY_DN195_c0_g1_i1::g.31225::m.31225	IS_216438_Aes_Skin_Mucus_band_Pann_DB	1	0.000266856	1	1	3	0.17037	15 kDa
SRR8000_TRINITY_DN21371_c5_g3::SRR8000_TRINITY_DN21371_c5_g3_i2::g.94110::m.94110 [type:complete len:197 gc:universal SRR8000_TRINITY_DN21371_c5_g3_i2:1404-814(-)]	type:complete len:257 gc:universal SRR8000_TRINITY_DN21371_c5_g3_i4:1584-814(-)	SRR8000_TRINITY_DN21371_c5_g3::SRR8000_TRINITY_DN21371_c5_g3_i4::g.94113::m.94113	IS_216438_Aes_Skin_Mucus_band_Pann_DB	1	0.000355809	2	2	4	0.167969	29 kDa
SRR8017_TRINITY_DN19851_c0_g1::SRR8017_TRINITY_DN19851_c0_g1_i1::g.114492::m.114492 [type:complete len:103 gc:universal SRR8017_TRINITY_DN19851_c0_g1_i1:609-301(-)]	type:5prime_partial len:127 gc:universal SRR1330_TRINITY_DN112856_c0_g1_i2:2-382(+)	SRR1330_TRINITY_DN112856_c0_g1::SRR1330_TRINITY_DN112856_c0_g1_i2::g.237836::m.237836	IS_216438_Aes_Skin_Mucus_band_Pann_DB	1	0.000266856	2	2	3	0.18254	14 kDa
SRR8017_TRINITY_DN25334_c5_g2::SRR8017_TRINITY_DN25334_c5_g2_i5::g.120080::m.120080 [type:complete len:141 gc:universal SRR8017_TRINITY_DN25334_c5_g2_i5:1137-715(-)]	type:complete len:141 gc:universal SRR8017_TRINITY_DN25334_c5_g2_i5:1137-715(-)	SRR8017_TRINITY_DN25334_c5_g2::SRR8017_TRINITY_DN25334_c5_g2_i5::g.120080::m.120080	IS_216438_Aes_Skin_Mucus_band_Pann_DB	1	0.000533713	4	5	6	0.35	15 kDa
SRR7978_TRINITY_DN33629_c0_g1::SRR7978_TRINITY_DN33629_c0_g1_i1::g.27982::m.27982 [type:5prime_partial len:169 gc:universal SRR7978_TRINITY_DN33629_c0_g1_i1:3-509(+)]	type:5prime_partial len:169 gc:universal SRR7978_TRINITY_DN33629_c0_g1_i1:3-509(+)	SRR7978_TRINITY_DN33629_c0_g1::SRR7978_TRINITY_DN33629_c0_g1_i1::g.27982::m.27982	IS_216438_Aes_Skin_Mucus_band_Pann_DB	1	0.000355809	2	2	4	0.136905	19 kDa
SRR8020_TRINITY_DN30092_c0_g1::SRR8020_TRINITY_DN30092_c0_g1_i7::g.122208::m.122208 [type:complete len:131 gc:universal SRR8020_TRINITY_DN30092_c0_g1_i7:2629-3021(+)]	type:3prime_partial len:124 gc:universal SRR1329_TRINITY_DN352908_c0_g1_i1:371-3(-)	SRR1329_TRINITY_DN352908_c0_g1::SRR1329_TRINITY_DN352908_c0_g1_i1::g.187318::m.187318	IS_216438_Aes_Skin_Mucus_band_Pann_DB	1	0.000266856	1	1	3	0.227642	13 kDa
SRR7979_TRINITY_DN19633_c1_g1::SRR7979_TRINITY_DN19633_c1_g1_i1::g.52531::m.52531 [type:complete len:200 gc:universal SRR7979_TRINITY_DN19633_c1_g1_i1:115-714(+)]	type:complete len:200 gc:universal SRR7979_TRINITY_DN19633_c1_g1_i1:115-714(+)	SRR7979_TRINITY_DN19633_c1_g1::SRR7979_TRINITY_DN19633_c1_g1_i1::g.52531::m.52531	IS_216438_Aes_Skin_Mucus_band_Pann_DB	1	0.000266856	2	2	3	0.0653266	22 kDa
SRR7978_TRINITY_DN19499_c3_g1::SRR7978_TRINITY_DN19499_c3_g1_i1::g.44861::m.44861 [type:complete len:106 gc:universal SRR7978_TRINITY_DN19499_c3_g1_i1:177-494(+)]	type:complete len:106 gc:universal SRR7978_TRINITY_DN19499_c3_g1_i1:177-494(+)	SRR7978_TRINITY_DN19499_c3_g1::SRR7978_TRINITY_DN19499_c3_g1_i1::g.44861::m.44861	IS_216438_Aes_Skin_Mucus_band_Pann_DB	1	0.000622665	2	2	7	0.704762	12 kDa
SRR7979_TRINITY_DN16686_c0_g1::SRR7979_TRINITY_DN16686_c0_g1_i2::g.46219::m.46219 [type:complete len:460 gc:universal SRR7979_TRINITY_DN16686_c0_g1_i2:226-1605(+)]	type:complete len:460 gc:universal SRR7979_TRINITY_DN16686_c0_g1_i2:226-1605(+)	SRR7979_TRINITY_DN16686_c0_g1::SRR7979_TRINITY_DN16686_c0_g1_i2::g.46219::m.46219	IS_216438_Aes_Skin_Mucus_band_Pann_DB	1	0.000444761	3	4	5	0.0740741	52 kDa
SRR7914_TRINITY_DN28570_c0_g1::SRR7914_TRINITY_DN28570_c0_g1_i1::g.17508::m.17508 [type:complete len:143 gc:universal SRR7914_TRINITY_DN28570_c0_g1_i1:506-934(+)]	type:complete len:143 gc:universal SRR7914_TRINITY_DN28570_c0_g1_i1:506-934(+)	SRR7914_TRINITY_DN28570_c0_g1::SRR7914_TRINITY_DN28570_c0_g1_i1::g.17508::m.17508	IS_216438_Aes_Skin_Mucus_band_Pann_DB	1	0.000266856	3	3	3	0.225352	16 kDa
SRR8000_TRINITY_DN22304_c3_g2::SRR8000_TRINITY_DN22304_c3_g2_i2::g.95904::m.95904 [type:complete len:124 gc:universal SRR8000_TRINITY_DN22304_c3_g2_i2:946-1317(+)]	type:complete len:124 gc:universal SRR8000_TRINITY_DN22304_c3_g2_i2:946-1317(+)	SRR8000_TRINITY_DN22304_c3_g2::SRR8000_TRINITY_DN22304_c3_g2_i2::g.95904::m.95904	IS_216438_Aes_Skin_Mucus_band_Pann_DB	1	0.000266856	3	3	3	0.357724	13 kDa
SRR7978_TRINITY_DN17916_c0_g1::SRR7978_TRINITY_DN17916_c0_g1_i2::g.35999::m.35999 [type:5prime_partial len:172 gc:universal SRR7978_TRINITY_DN17916_c0_g1_i2:737-222(-)]	type:5prime_partial len:190 gc:universal SRR8021_TRINITY_DN20472_c4_g2_i10:960-391(-)	SRR8021_TRINITY_DN20472_c4_g2::SRR8021_TRINITY_DN20472_c4_g2_i10::g.152052::m.152052	IS_216438_Aes_Skin_Mucus_band_Pann_DB	1	0.000355809	3	3	4	0.26455	21 kDa
sp|K1C15_SHEEP| [sp|K1C15_SHEEP|]	sp|K1C15_SHEEP|	sp|K1C15_SHEEP|	IS_216438_Aes_Skin_Mucus_band_Pann_DB	0.99	0.000266856	1	1	3	0.0419426	49 kDa
SRR7914_TRINITY_DN28925_c0_g3::SRR7914_TRINITY_DN28925_c0_g3_i1::g.22413::m.22413 [type:complete len:130 gc:universal SRR7914_TRINITY_DN28925_c0_g3_i1:4137-3748(-)]	type:complete len:130 gc:universal SRR7914_TRINITY_DN28925_c0_g3_i1:4137-3748(-)	SRR7914_TRINITY_DN28925_c0_g3::SRR7914_TRINITY_DN28925_c0_g3_i1::g.22413::m.22413	IS_216438_Aes_Skin_Mucus_band_Pann_DB	0.99	0.000800569	1	1	9	0.379845	14 kDa
SRR7914_TRINITY_DN31227_c7_g1::SRR7914_TRINITY_DN31227_c7_g1_i5::g.21363::m.21363 [type:complete len:174 gc:universal SRR7914_TRINITY_DN31227_c7_g1_i5:280-801(+)]	type:complete len:140 gc:universal SRR1329_TRINITY_DN337269_c0_g1_i2:498-79(-)	SRR1329_TRINITY_DN337269_c0_g1::SRR1329_TRINITY_DN337269_c0_g1_i2::g.195924::m.195924	IS_216438_Aes_Skin_Mucus_band_Pann_DB	1	0.000177904	2	2	2	0.194245	14 kDa
SRR7914_TRINITY_DN29761_c6_g4::SRR7914_TRINITY_DN29761_c6_g4_i4::g.10407::m.10407 [type:complete len:248 gc:universal SRR7914_TRINITY_DN29761_c6_g4_i4:325-1068(+)]	type:3prime_partial len:388 gc:universal SRR1330_TRINITY_DN111419_c0_g1_i3:1163-3(-)	SRR1330_TRINITY_DN111419_c0_g1::SRR1330_TRINITY_DN111419_c0_g1_i3::g.217976::m.217976	IS_216438_Aes_Skin_Mucus_band_Pann_DB	1	0.000355809	4	4	4	0.152455	44 kDa
SRR7980_TRINITY_DN19176_c2_g1::SRR7980_TRINITY_DN19176_c2_g1_i2::g.85355::m.85355 [type:complete len:115 gc:universal SRR7980_TRINITY_DN19176_c2_g1_i2:2870-2526(-)]	type:complete len:115 gc:universal SRR7980_TRINITY_DN19176_c2_g1_i2:2870-2526(-)	SRR7980_TRINITY_DN19176_c2_g1::SRR7980_TRINITY_DN19176_c2_g1_i2::g.85355::m.85355	IS_216438_Aes_Skin_Mucus_band_Pann_DB	1	0.000355809	3	4	4	0.263158	13 kDa
SRR7914_TRINITY_DN32428_c2_g2::SRR7914_TRINITY_DN32428_c2_g2_i8::g.4502::m.4502 [type:complete len:153 gc:universal SRR7914_TRINITY_DN32428_c2_g2_i8:2361-1903(-)]	type:complete len:153 gc:universal SRR7914_TRINITY_DN32428_c2_g2_i8:2361-1903(-)	SRR7914_TRINITY_DN32428_c2_g2::SRR7914_TRINITY_DN32428_c2_g2_i8::g.4502::m.4502	IS_216438_Aes_Skin_Mucus_band_Pann_DB	0.99	0.000177904	2	2	2	0.111842	18 kDa
SRR7979_TRINITY_DN19353_c1_g1::SRR7979_TRINITY_DN19353_c1_g1_i3::g.64230::m.64230 [type:complete len:192 gc:universal SRR7979_TRINITY_DN19353_c1_g1_i3:4287-3712(-)]	type:complete len:195 gc:universal SRR1329_TRINITY_DN346572_c7_g1_i6:642-58(-)	SRR1329_TRINITY_DN346572_c7_g1::SRR1329_TRINITY_DN346572_c7_g1_i6::g.199523::m.199523	IS_216438_Aes_Skin_Mucus_band_Pann_DB	1	0.000177904	1	1	2	0.0979381	21 kDa
SRR1329_TRINITY_DN348356_c2_g2::SRR1329_TRINITY_DN348356_c2_g2_i1::g.201036::m.201036 [type:complete len:115 gc:universal SRR1329_TRINITY_DN348356_c2_g2_i1:475-131(-)]	type:complete len:115 gc:universal SRR1329_TRINITY_DN348356_c2_g2_i1:475-131(-)	SRR1329_TRINITY_DN348356_c2_g2::SRR1329_TRINITY_DN348356_c2_g2_i1::g.201036::m.201036	IS_216438_Aes_Skin_Mucus_band_Pann_DB	1	0.000711617	3	4	8	0.403509	13 kDa
SRR7980_TRINITY_DN19835_c4_g2::SRR7980_TRINITY_DN19835_c4_g2_i1::g.83833::m.83833 [type:complete len:100 gc:universal SRR7980_TRINITY_DN19835_c4_g2_i1:475-176(-)]	type:complete len:100 gc:universal SRR7980_TRINITY_DN19835_c4_g2_i1:475-176(-)	SRR7980_TRINITY_DN19835_c4_g2::SRR7980_TRINITY_DN19835_c4_g2_i1::g.83833::m.83833	IS_216438_Aes_Skin_Mucus_band_Pann_DB	1	0.000533713	5	5	6	0.333333	12 kDa
SRR7979_TRINITY_DN14453_c0_g1::SRR7979_TRINITY_DN14453_c0_g1_i1::g.53738::m.53738 [type:complete len:518 gc:universal SRR7979_TRINITY_DN14453_c0_g1_i1:247-1800(+)]	type:complete len:518 gc:universal SRR7979_TRINITY_DN14453_c0_g1_i1:247-1800(+)	SRR7979_TRINITY_DN14453_c0_g1::SRR7979_TRINITY_DN14453_c0_g1_i1::g.53738::m.53738	IS_216438_Aes_Skin_Mucus_band_Pann_DB	1	0.000533713	6	6	6	0.10058	57 kDa
SRR7978_TRINITY_DN19508_c0_g1::SRR7978_TRINITY_DN19508_c0_g1_i2::g.42550::m.42550 [type:complete len:142 gc:universal SRR7978_TRINITY_DN19508_c0_g1_i2:1611-2036(+)]	type:complete len:142 gc:universal SRR7978_TRINITY_DN19508_c0_g1_i2:1611-2036(+)	SRR7978_TRINITY_DN19508_c0_g1::SRR7978_TRINITY_DN19508_c0_g1_i2::g.42550::m.42550	IS_216438_Aes_Skin_Mucus_band_Pann_DB	1	0.000355809	4	4	4	0.347518	16 kDa
SRR8017_TRINITY_DN26790_c1_g1::SRR8017_TRINITY_DN26790_c1_g1_i1::g.112114::m.112114 [type:complete len:118 gc:universal SRR8017_TRINITY_DN26790_c1_g1_i1:781-428(-)]	type:complete len:118 gc:universal SRR7979_TRINITY_DN18279_c5_g7_i1:617-264(-)	SRR7979_TRINITY_DN18279_c5_g7::SRR7979_TRINITY_DN18279_c5_g7_i1::g.61801::m.61801	IS_216438_Aes_Skin_Mucus_band_Pann_DB	1	0.000355809	2	3	4	0.307692	13 kDa
SRR8017_TRINITY_DN50009_c0_g1::SRR8017_TRINITY_DN50009_c0_g1_i1::g.102934::m.102934 [type:complete len:149 gc:universal SRR8017_TRINITY_DN50009_c0_g1_i1:85-531(+)]	type:complete len:149 gc:universal SRR8017_TRINITY_DN50009_c0_g1_i1:85-531(+)	SRR8017_TRINITY_DN50009_c0_g1::SRR8017_TRINITY_DN50009_c0_g1_i1::g.102934::m.102934	IS_216438_Aes_Skin_Mucus_band_Pann_DB	0.99	0.000177904	2	2	2	0.114865	17 kDa
SRR1330_TRINITY_DN123871_c0_g5::SRR1330_TRINITY_DN123871_c0_g5_i2::g.209378::m.209378 [type:complete len:377 gc:universal SRR1330_TRINITY_DN123871_c0_g5_i2:1904-774(-)]	type:complete len:377 gc:universal SRR1330_TRINITY_DN123871_c0_g5_i2:1904-774(-)	SRR1330_TRINITY_DN123871_c0_g5::SRR1330_TRINITY_DN123871_c0_g5_i2::g.209378::m.209378	IS_216438_Aes_Skin_Mucus_band_Pann_DB	0.99	0.000800569	0	0	9	0.271277	42 kDa
SRR7978_TRINITY_DN18640_c2_g1::SRR7978_TRINITY_DN18640_c2_g1_i3::g.32015::m.32015 [type:complete len:127 gc:universal SRR7978_TRINITY_DN18640_c2_g1_i3:236-616(+)]	type:complete len:127 gc:universal SRR7978_TRINITY_DN18640_c2_g1_i3:236-616(+)	SRR7978_TRINITY_DN18640_c2_g1::SRR7978_TRINITY_DN18640_c2_g1_i3::g.32015::m.32015	IS_216438_Aes_Skin_Mucus_band_Pann_DB	1	0.000266856	3	3	3	0.388889	14 kDa
SRR7979_TRINITY_DN19353_c1_g1::SRR7979_TRINITY_DN19353_c1_g1_i3::g.64230::m.64230 [type:complete len:192 gc:universal SRR7979_TRINITY_DN19353_c1_g1_i3:4287-3712(-)]	type:5prime_partial len:190 gc:universal SRR1329_TRINITY_DN325524_c0_g1_i2:2-571(+)	SRR1329_TRINITY_DN325524_c0_g1::SRR1329_TRINITY_DN325524_c0_g1_i2::g.170699::m.170699	IS_216438_Aes_Skin_Mucus_band_Pann_DB	1	0.000177904	1	1	2	0.116402	20 kDa
SRR7978_TRINITY_DN15010_c0_g1::SRR7978_TRINITY_DN15010_c0_g1_i2::g.38192::m.38192 [type:complete len:140 gc:universal SRR7978_TRINITY_DN15010_c0_g1_i2:483-902(+)]	type:5prime_partial len:128 gc:universal SRR1329_TRINITY_DN351915_c0_g1_i11:601-218(-)	SRR1329_TRINITY_DN351915_c0_g1::SRR1329_TRINITY_DN351915_c0_g1_i11::g.189225::m.189225	IS_216438_Aes_Skin_Mucus_band_Pann_DB	1	0.000266856	3	3	3	0.244094	14 kDa
SRR8017_TRINITY_DN25962_c2_g2::SRR8017_TRINITY_DN25962_c2_g2_i1::g.119664::m.119664 [type:complete len:118 gc:universal SRR8017_TRINITY_DN25962_c2_g2_i1:150-503(+)]	type:complete len:158 gc:universal SRR7914_TRINITY_DN25158_c0_g1_i2:2073-1600(-)	SRR7914_TRINITY_DN25158_c0_g1::SRR7914_TRINITY_DN25158_c0_g1_i2::g.9189::m.9189	IS_216438_Aes_Skin_Mucus_band_Pann_DB	1	0.000444761	3	4	5	0.248408	18 kDa
SRR7914_TRINITY_DN30010_c0_g4::SRR7914_TRINITY_DN30010_c0_g4_i3::g.208::m.208 [type:complete len:122 gc:universal SRR7914_TRINITY_DN30010_c0_g4_i3:407-42(-)]	type:complete len:122 gc:universal SRR7914_TRINITY_DN30010_c0_g4_i3:407-42(-)	SRR7914_TRINITY_DN30010_c0_g4::SRR7914_TRINITY_DN30010_c0_g4_i3::g.208::m.208	IS_216438_Aes_Skin_Mucus_band_Pann_DB	1	0.000444761	4	4	5	0.239669	14 kDa
SRR7979_TRINITY_DN18276_c4_g1::SRR7979_TRINITY_DN18276_c4_g1_i1::g.61950::m.61950 [type:complete len:166 gc:universal SRR7979_TRINITY_DN18276_c4_g1_i1:370-867(+)]	type:internal len:173 gc:universal SRR7914_TRINITY_DN13592_c0_g1_i1:516-1(-)	SRR7914_TRINITY_DN13592_c0_g1::SRR7914_TRINITY_DN13592_c0_g1_i1::g.22599::m.22599	IS_216438_Aes_Skin_Mucus_band_Pann_DB	1	0.000177904	2	2	2	0.139535	19 kDa
SRR7978_TRINITY_DN12478_c0_g1::SRR7978_TRINITY_DN12478_c0_g1_i1::g.25702::m.25702 [type:complete len:129 gc:universal SRR7978_TRINITY_DN12478_c0_g1_i1:562-176(-)]	type:complete len:129 gc:universal SRR7978_TRINITY_DN12478_c0_g1_i1:562-176(-)	SRR7978_TRINITY_DN12478_c0_g1::SRR7978_TRINITY_DN12478_c0_g1_i1::g.25702::m.25702	IS_216438_Aes_Skin_Mucus_band_Pann_DB	1	0.000266856	3	3	3	0.3125	14 kDa
SRR7980_TRINITY_DN4376_c0_g1::SRR7980_TRINITY_DN4376_c0_g1_i1::g.87556::m.87556 [type:complete len:126 gc:universal SRR7980_TRINITY_DN4376_c0_g1_i1:61-438(+)]	type:3prime_partial len:104 gc:universal SRR1330_TRINITY_DN258005_c0_g1_i1:309-1(-)	SRR1330_TRINITY_DN258005_c0_g1::SRR1330_TRINITY_DN258005_c0_g1_i1::g.268981::m.268981	IS_216438_Aes_Skin_Mucus_band_Pann_DB	1	0.000355809	3	3	4	0.38835	12 kDa
SRR7979_TRINITY_DN17192_c2_g9::SRR7979_TRINITY_DN17192_c2_g9_i1::g.49828::m.49828 [type:complete len:112 gc:universal SRR7979_TRINITY_DN17192_c2_g9_i1:901-566(-)]	type:complete len:112 gc:universal SRR7979_TRINITY_DN17192_c2_g9_i1:901-566(-)	SRR7979_TRINITY_DN17192_c2_g9::SRR7979_TRINITY_DN17192_c2_g9_i1::g.49828::m.49828	IS_216438_Aes_Skin_Mucus_band_Pann_DB	1	0.000355809	3	3	4	0.279279	13 kDa
SRR1330_TRINITY_DN85344_c0_g1::SRR1330_TRINITY_DN85344_c0_g1_i2::g.263194::m.263194 [type:3prime_partial len:115 gc:universal SRR1330_TRINITY_DN85344_c0_g1_i2:342-1(-)]	type:3prime_partial len:115 gc:universal SRR1330_TRINITY_DN85344_c0_g1_i2:342-1(-)	SRR1330_TRINITY_DN85344_c0_g1::SRR1330_TRINITY_DN85344_c0_g1_i2::g.263194::m.263194	IS_216438_Aes_Skin_Mucus_band_Pann_DB	1	0.000355809	4	4	4	0.307018	12 kDa
SRR7914_TRINITY_DN68216_c0_g1::SRR7914_TRINITY_DN68216_c0_g1_i1::g.775::m.775 [type:complete len:125 gc:universal SRR7914_TRINITY_DN68216_c0_g1_i1:443-69(-)]	type:complete len:125 gc:universal SRR7914_TRINITY_DN68216_c0_g1_i1:443-69(-)	SRR7914_TRINITY_DN68216_c0_g1::SRR7914_TRINITY_DN68216_c0_g1_i1::g.775::m.775	IS_216438_Aes_Skin_Mucus_band_Pann_DB	1	0.000355809	3	3	4	0.258064	14 kDa
SRR8020_TRINITY_DN30341_c6_g4::SRR8020_TRINITY_DN30341_c6_g4_i3::g.130254::m.130254 [type:complete len:113 gc:universal SRR8020_TRINITY_DN30341_c6_g4_i3:280-618(+)]	type:complete len:113 gc:universal SRR8020_TRINITY_DN30341_c6_g4_i3:280-618(+)	SRR8020_TRINITY_DN30341_c6_g4::SRR8020_TRINITY_DN30341_c6_g4_i3::g.130254::m.130254	IS_216438_Aes_Skin_Mucus_band_Pann_DB	1	0.000355809	2	3	4	0.276786	13 kDa
SRR7978_TRINITY_DN16633_c0_g1::SRR7978_TRINITY_DN16633_c0_g1_i1::g.25858::m.25858 [type:complete len:106 gc:universal SRR7978_TRINITY_DN16633_c0_g1_i1:160-477(+)]	type:5prime_partial len:106 gc:universal SRR1330_TRINITY_DN112130_c0_g1_i1:2-319(+)	SRR1330_TRINITY_DN112130_c0_g1::SRR1330_TRINITY_DN112130_c0_g1_i1::g.220794::m.220794	IS_216438_Aes_Skin_Mucus_band_Pann_DB	1	0.000266856	3	3	3	0.2	12 kDa
SRR7978_TRINITY_DN18117_c0_g1::SRR7978_TRINITY_DN18117_c0_g1_i1::g.29487::m.29487 [type:complete len:130 gc:universal SRR7978_TRINITY_DN18117_c0_g1_i1:640-1029(+)]	type:complete len:130 gc:universal SRR7978_TRINITY_DN18117_c0_g1_i1:640-1029(+)	SRR7978_TRINITY_DN18117_c0_g1::SRR7978_TRINITY_DN18117_c0_g1_i1::g.29487::m.29487	IS_216438_Aes_Skin_Mucus_band_Pann_DB	1	0.000266856	2	3	3	0.232558	14 kDa
SRR7914_TRINITY_DN31587_c2_g1::SRR7914_TRINITY_DN31587_c2_g1_i2::g.9685::m.9685 [type:complete len:123 gc:universal SRR7914_TRINITY_DN31587_c2_g1_i2:721-353(-)]	type:complete len:123 gc:universal SRR7914_TRINITY_DN31587_c2_g1_i2:721-353(-)	SRR7914_TRINITY_DN31587_c2_g1::SRR7914_TRINITY_DN31587_c2_g1_i2::g.9685::m.9685	IS_216438_Aes_Skin_Mucus_band_Pann_DB	1	0.000266856	2	2	3	0.172131	14 kDa
SRR7980_TRINITY_DN18392_c2_g1::SRR7980_TRINITY_DN18392_c2_g1_i1::g.71772::m.71772 [type:complete len:104 gc:universal SRR7980_TRINITY_DN18392_c2_g1_i1:2637-2326(-)]	type:complete len:104 gc:universal SRR7980_TRINITY_DN18392_c2_g1_i1:2637-2326(-)	SRR7980_TRINITY_DN18392_c2_g1::SRR7980_TRINITY_DN18392_c2_g1_i1::g.71772::m.71772	IS_216438_Aes_Skin_Mucus_band_Pann_DB	0.99	0.000266856	2	3	3	0.116505	12 kDa
SRR7978_TRINITY_DN15508_c0_g2::SRR7978_TRINITY_DN15508_c0_g2_i1::g.29620::m.29620 [type:complete len:154 gc:universal SRR7978_TRINITY_DN15508_c0_g2_i1:239-700(+)]	type:complete len:154 gc:universal SRR7978_TRINITY_DN15508_c0_g2_i1:239-700(+)	SRR7978_TRINITY_DN15508_c0_g2::SRR7978_TRINITY_DN15508_c0_g2_i1::g.29620::m.29620	IS_216438_Aes_Skin_Mucus_band_Pann_DB	1	0.000177904	2	2	2	0.20915	17 kDa
SRR7978_TRINITY_DN17361_c0_g1::SRR7978_TRINITY_DN17361_c0_g1_i1::g.43365::m.43365 [type:complete len:141 gc:universal SRR7978_TRINITY_DN17361_c0_g1_i1:983-561(-)]	type:complete len:141 gc:universal SRR7978_TRINITY_DN17361_c0_g1_i1:983-561(-)	SRR7978_TRINITY_DN17361_c0_g1::SRR7978_TRINITY_DN17361_c0_g1_i1::g.43365::m.43365	IS_216438_Aes_Skin_Mucus_band_Pann_DB	1	0.000266856	1	1	3	0.121429	15 kDa
sp|ALBU_BOVIN| [sp|ALBU_BOVIN|]	sp|ALBU_BOVIN|	sp|ALBU_BOVIN|	IS_216438_Aes_Skin_Mucus_lane_Pann_DB	1	0.000997045	14	17	28	0.321252	69 kDa
SRR7978_TRINITY_DN19380_c1_g1::SRR7978_TRINITY_DN19380_c1_g1_i3::g.40942::m.40942 [type:complete len:104 gc:universal SRR7978_TRINITY_DN19380_c1_g1_i3:156-467(+)]	type:5prime_partial len:128 gc:universal SRR1329_TRINITY_DN353425_c12_g2_i10:543-160(-)	SRR1329_TRINITY_DN353425_c12_g2::SRR1329_TRINITY_DN353425_c12_g2_i10::g.167703::m.167703	IS_216438_Aes_Skin_Mucus_lane_Pann_DB	1	0.00252822	9	16	71	0.433071	14 kDa
SRR7978_TRINITY_DN14411_c1_g1::SRR7978_TRINITY_DN14411_c1_g1_i2::g.31295::m.31295 [type:5prime_partial len:252 gc:universal SRR7978_TRINITY_DN14411_c1_g1_i2:1674-919(-)]	type:5prime_partial len:252 gc:universal SRR7978_TRINITY_DN14411_c1_g1_i2:1674-919(-)	SRR7978_TRINITY_DN14411_c1_g1::SRR7978_TRINITY_DN14411_c1_g1_i2::g.31295::m.31295	IS_216438_Aes_Skin_Mucus_lane_Pann_DB	1	0.00480718	19	30	135	0.741036	28 kDa
sp|K2C1_HUMAN| [sp|K2C1_HUMAN|]	sp|K2C1_HUMAN|	sp|K2C1_HUMAN|	IS_216438_Aes_Skin_Mucus_lane_Pann_DB	1	0.00640957	34	50	180	0.466563	66 kDa
sp|K1C9_HUMAN| [sp|K1C9_HUMAN|]	sp|K1C9_HUMAN|	sp|K1C9_HUMAN|	IS_216438_Aes_Skin_Mucus_lane_Pann_DB	1	0.00338283	25	38	95	0.552167	62 kDa
sp|K1C10_HUMAN| [sp|K1C10_HUMAN|]	sp|K1C10_HUMAN|	sp|K1C10_HUMAN|	IS_216438_Aes_Skin_Mucus_lane_Pann_DB	1	0.00697931	26	38	196	0.505902	60 kDa
SRR7980_TRINITY_DN18311_c3_g1::SRR7980_TRINITY_DN18311_c3_g1_i1::g.72213::m.72213 [type:complete len:243 gc:universal SRR7980_TRINITY_DN18311_c3_g1_i1:6206-5478(-)]	type:complete len:243 gc:universal SRR7980_TRINITY_DN18311_c3_g1_i1:6206-5478(-)	SRR7980_TRINITY_DN18311_c3_g1::SRR7980_TRINITY_DN18311_c3_g1_i1::g.72213::m.72213	IS_216438_Aes_Skin_Mucus_lane_Pann_DB	1	0.00772709	12	17	217	0.479339	28 kDa
SRR7978_TRINITY_DN14411_c1_g3::SRR7978_TRINITY_DN14411_c1_g3_i1::g.31296::m.31296 [type:internal len:171 gc:universal SRR7978_TRINITY_DN14411_c1_g3_i1:3-512(+)]	type:internal len:171 gc:universal SRR7978_TRINITY_DN14411_c1_g3_i1:3-512(+)	SRR7978_TRINITY_DN14411_c1_g3::SRR7978_TRINITY_DN14411_c1_g3_i1::g.31296::m.31296	IS_216438_Aes_Skin_Mucus_lane_Pann_DB	1	0.00331161	14	25	93	0.705882	19 kDa
sp|K22E_HUMAN| [sp|K22E_HUMAN|]	sp|K22E_HUMAN|	sp|K22E_HUMAN|	IS_216438_Aes_Skin_Mucus_lane_Pann_DB	1	0.00587544	29	41	165	0.607752	66 kDa
sp|TRYP_PIG| [sp|TRYP_PIG|]	sp|TRYP_PIG|	sp|TRYP_PIG|	IS_216438_Aes_Skin_Mucus_lane_Pann_DB	1	0.00217213	3	3	61	0.164502	24 kDa
SRR1330_TRINITY_DN122443_c0_g1::SRR1330_TRINITY_DN122443_c0_g1_i1::g.219674::m.219674 [type:complete len:1459 gc:universal SRR1330_TRINITY_DN122443_c0_g1_i1:5963-1587(-)]	type:complete len:1459 gc:universal SRR1330_TRINITY_DN122443_c0_g1_i1:5963-1587(-)	SRR1330_TRINITY_DN122443_c0_g1::SRR1330_TRINITY_DN122443_c0_g1_i1::g.219674::m.219674	IS_216438_Aes_Skin_Mucus_lane_Pann_DB	1	0.00110387	23	23	31	0.227023	162 kDa
SRR7979_TRINITY_DN18586_c1_g3::SRR7979_TRINITY_DN18586_c1_g3_i2::g.60317::m.60317 [type:complete len:684 gc:universal SRR7979_TRINITY_DN18586_c1_g3_i2:321-2372(+)]	type:complete len:706 gc:universal SRR1330_TRINITY_DN122622_c11_g1_i10:2271-154(-)	SRR1330_TRINITY_DN122622_c11_g1::SRR1330_TRINITY_DN122622_c11_g1_i10::g.217406::m.217406	IS_216438_Aes_Skin_Mucus_lane_Pann_DB	1	0.00170922	24	32	48	0.438298	79 kDa
SRR8017_TRINITY_DN50100_c0_g1::SRR8017_TRINITY_DN50100_c0_g1_i1::g.120442::m.120442 [type:complete len:720 gc:universal SRR8017_TRINITY_DN50100_c0_g1_i1:2330-171(-)]	type:complete len:720 gc:universal SRR8017_TRINITY_DN50100_c0_g1_i1:2330-171(-)	SRR8017_TRINITY_DN50100_c0_g1::SRR8017_TRINITY_DN50100_c0_g1_i1::g.120442::m.120442	IS_216438_Aes_Skin_Mucus_lane_Pann_DB	1	0.00512766	38	53	144	0.553547	82 kDa
SRR1330_TRINITY_DN124479_c0_g1::SRR1330_TRINITY_DN124479_c0_g1_i6::g.230241::m.230241 [type:complete len:686 gc:universal SRR1330_TRINITY_DN124479_c0_g1_i6:2245-188(-)]	type:complete len:686 gc:universal SRR1330_TRINITY_DN124479_c0_g1_i6:2245-188(-)	SRR1330_TRINITY_DN124479_c0_g1::SRR1330_TRINITY_DN124479_c0_g1_i6::g.230241::m.230241	IS_216438_Aes_Skin_Mucus_lane_Pann_DB	1	0.00145996	15	19	41	0.258394	77 kDa
SRR7914_TRINITY_DN29934_c0_g1::SRR7914_TRINITY_DN29934_c0_g1_i7::g.10782::m.10782 [type:complete len:335 gc:universal SRR7914_TRINITY_DN29934_c0_g1_i7:266-1270(+)]	type:complete len:335 gc:universal SRR7914_TRINITY_DN29934_c0_g1_i7:266-1270(+)	SRR7914_TRINITY_DN29934_c0_g1::SRR7914_TRINITY_DN29934_c0_g1_i7::g.10782::m.10782	IS_216438_Aes_Skin_Mucus_lane_Pann_DB	1	0.00324039	10	22	91	0.51497	36 kDa
SRR7914_TRINITY_DN29932_c6_g3::SRR7914_TRINITY_DN29932_c6_g3_i1::g.10467::m.10467 [type:3prime_partial len:303 gc:universal SRR7914_TRINITY_DN29932_c6_g3_i1:462-1367(+)]	type:complete len:436 gc:universal SRR8000_TRINITY_DN20528_c0_g1_i1:264-1571(+)	SRR8000_TRINITY_DN20528_c0_g1::SRR8000_TRINITY_DN20528_c0_g1_i1::g.99850::m.99850	IS_216438_Aes_Skin_Mucus_lane_Pann_DB	1	0.0020297	16	26	57	0.526437	47 kDa
SRR8017_TRINITY_DN25002_c7_g2::SRR8017_TRINITY_DN25002_c7_g2_i7::g.121404::m.121404 [type:complete len:857 gc:universal SRR8017_TRINITY_DN25002_c7_g2_i7:5780-3210(-)]	type:complete len:857 gc:universal SRR8017_TRINITY_DN25002_c7_g2_i7:5780-3210(-)	SRR8017_TRINITY_DN25002_c7_g2::SRR8017_TRINITY_DN25002_c7_g2_i7::g.121404::m.121404	IS_216438_Aes_Skin_Mucus_lane_Pann_DB	1	0.00235018	22	30	66	0.418224	96 kDa
SRR7978_TRINITY_DN19466_c0_g1::SRR7978_TRINITY_DN19466_c0_g1_i1::g.44911::m.44911 [type:5prime_partial len:158 gc:universal SRR7978_TRINITY_DN19466_c0_g1_i1:1-474(+)]	type:5prime_partial len:158 gc:universal SRR7978_TRINITY_DN19466_c0_g1_i1:1-474(+)	SRR7978_TRINITY_DN19466_c0_g1::SRR7978_TRINITY_DN19466_c0_g1_i1::g.44911::m.44911	IS_216438_Aes_Skin_Mucus_lane_Pann_DB	1	0.000712175	8	12	20	0.55414	17 kDa
SRR1330_TRINITY_DN110493_c0_g1::SRR1330_TRINITY_DN110493_c0_g1_i2::g.250426::m.250426 [type:complete len:339 gc:universal SRR1330_TRINITY_DN110493_c0_g1_i2:92-1108(+)]	type:complete len:339 gc:universal SRR1330_TRINITY_DN110493_c0_g1_i2:92-1108(+)	SRR1330_TRINITY_DN110493_c0_g1::SRR1330_TRINITY_DN110493_c0_g1_i2::g.250426::m.250426	IS_216438_Aes_Skin_Mucus_lane_Pann_DB	1	0.000534131	7	9	15	0.310651	38 kDa
SRR1330_TRINITY_DN116543_c0_g1::SRR1330_TRINITY_DN116543_c0_g1_i2::g.206660::m.206660 [type:5prime_partial len:349 gc:universal SRR1330_TRINITY_DN116543_c0_g1_i2:1969-923(-)]	type:5prime_partial len:349 gc:universal SRR1330_TRINITY_DN116543_c0_g1_i2:1969-923(-)	SRR1330_TRINITY_DN116543_c0_g1::SRR1330_TRINITY_DN116543_c0_g1_i2::g.206660::m.206660	IS_216438_Aes_Skin_Mucus_lane_Pann_DB	1	0.00213652	20	30	60	0.586207	39 kDa
SRR1330_TRINITY_DN119139_c0_g1::SRR1330_TRINITY_DN119139_c0_g1_i13::g.245446::m.245446 [type:5prime_partial len:483 gc:universal SRR1330_TRINITY_DN119139_c0_g1_i13:3-1451(+)]	type:5prime_partial len:483 gc:universal SRR1330_TRINITY_DN119139_c0_g1_i13:3-1451(+)	SRR1330_TRINITY_DN119139_c0_g1::SRR1330_TRINITY_DN119139_c0_g1_i13::g.245446::m.245446	IS_216438_Aes_Skin_Mucus_lane_Pann_DB	1	0.00149557	12	16	42	0.385892	54 kDa
SRR7978_TRINITY_DN11304_c0_g1::SRR7978_TRINITY_DN11304_c0_g1_i2::g.33775::m.33775 [type:internal len:215 gc:universal SRR7978_TRINITY_DN11304_c0_g1_i2:1-642(+)]	type:internal len:215 gc:universal SRR7978_TRINITY_DN11304_c0_g1_i2:1-642(+)	SRR7978_TRINITY_DN11304_c0_g1::SRR7978_TRINITY_DN11304_c0_g1_i2::g.33775::m.33775	IS_216438_Aes_Skin_Mucus_lane_Pann_DB	1	0.00128191	6	12	36	0.350467	23 kDa
SRR7978_TRINITY_DN19183_c1_g1::SRR7978_TRINITY_DN19183_c1_g1_i1::g.37650::m.37650 [type:complete len:154 gc:universal SRR7978_TRINITY_DN19183_c1_g1_i1:320-781(+)]	type:complete len:154 gc:universal SRR7978_TRINITY_DN19183_c1_g1_i1:320-781(+)	SRR7978_TRINITY_DN19183_c1_g1::SRR7978_TRINITY_DN19183_c1_g1_i1::g.37650::m.37650	IS_216438_Aes_Skin_Mucus_lane_Pann_DB	1	0.00113948	8	15	32	0.712418	17 kDa
SRR7979_TRINITY_DN17616_c0_g6::SRR7979_TRINITY_DN17616_c0_g6_i6::g.64668::m.64668 [type:complete len:658 gc:universal SRR7979_TRINITY_DN17616_c0_g6_i6:2570-4543(+)]	type:complete len:658 gc:universal SRR7979_TRINITY_DN17616_c0_g6_i6:2570-4543(+)	SRR7979_TRINITY_DN17616_c0_g6::SRR7979_TRINITY_DN17616_c0_g6_i6::g.64668::m.64668	IS_216438_Aes_Skin_Mucus_lane_Pann_DB	1	0.0020297	17	23	57	0.38965	73 kDa
SRR1330_TRINITY_DN114860_c0_g1::SRR1330_TRINITY_DN114860_c0_g1_i3::g.229783::m.229783 [type:complete len:121 gc:universal SRR1330_TRINITY_DN114860_c0_g1_i3:63-425(+)]	type:complete len:121 gc:universal SRR1330_TRINITY_DN114860_c0_g1_i3:63-425(+)	SRR1330_TRINITY_DN114860_c0_g1::SRR1330_TRINITY_DN114860_c0_g1_i3::g.229783::m.229783	IS_216438_Aes_Skin_Mucus_lane_Pann_DB	1	0.00128191	5	9	36	0.516667	14 kDa
SRR7978_TRINITY_DN19380_c0_g1::SRR7978_TRINITY_DN19380_c0_g1_i4::g.40935::m.40935 [type:5prime_partial len:128 gc:universal SRR7978_TRINITY_DN19380_c0_g1_i4:1-384(+)]	type:5prime_partial len:153 gc:universal SRR7980_TRINITY_DN18366_c7_g1_i4:1-459(+)	SRR7980_TRINITY_DN18366_c7_g1::SRR7980_TRINITY_DN18366_c7_g1_i4::g.72275::m.72275	IS_216438_Aes_Skin_Mucus_lane_Pann_DB	1	0.003276	1	4	92	0.513158	17 kDa
SRR7980_TRINITY_DN18145_c1_g1::SRR7980_TRINITY_DN18145_c1_g1_i5::g.75541::m.75541 [type:complete len:507 gc:universal SRR7980_TRINITY_DN18145_c1_g1_i5:275-1795(+)]	type:complete len:507 gc:universal SRR1330_TRINITY_DN117089_c0_g1_i6:139-1659(+)	SRR1330_TRINITY_DN117089_c0_g1::SRR1330_TRINITY_DN117089_c0_g1_i6::g.225077::m.225077	IS_216438_Aes_Skin_Mucus_lane_Pann_DB	1	0.00167361	24	27	47	0.541502	57 kDa
SRR7914_TRINITY_DN28680_c0_g1::SRR7914_TRINITY_DN28680_c0_g1_i1::g.14783::m.14783 [type:internal len:271 gc:universal SRR7914_TRINITY_DN28680_c0_g1_i1:3-812(+)]	type:internal len:501 gc:universal SRR7914_TRINITY_DN28680_c0_g1_i2:3-1502(+)	SRR7914_TRINITY_DN28680_c0_g1::SRR7914_TRINITY_DN28680_c0_g1_i2::g.14784::m.14784	IS_216438_Aes_Skin_Mucus_lane_Pann_DB	1	0.010647	6	9	299	0.61	53 kDa
SRR7914_TRINITY_DN28680_c0_g1::SRR7914_TRINITY_DN28680_c0_g1_i1::g.14783::m.14783 [type:internal len:271 gc:universal SRR7914_TRINITY_DN28680_c0_g1_i1:3-812(+)]	type:complete len:350 gc:universal SRR7980_TRINITY_DN19221_c2_g4_i1:175-1224(+)	SRR7980_TRINITY_DN19221_c2_g4::SRR7980_TRINITY_DN19221_c2_g4_i1::g.76688::m.76688	IS_216438_Aes_Skin_Mucus_lane_Pann_DB	1	0.0100773	5	6	283	0.891117	38 kDa
SRR8020_TRINITY_DN29716_c2_g2::SRR8020_TRINITY_DN29716_c2_g2_i1::g.132635::m.132635 [type:complete len:152 gc:universal SRR8020_TRINITY_DN29716_c2_g2_i1:848-393(-)]	type:5prime_partial len:178 gc:universal SRR8000_TRINITY_DN21703_c8_g3_i2:3-536(+)	SRR8000_TRINITY_DN21703_c8_g3::SRR8000_TRINITY_DN21703_c8_g3_i2::g.94394::m.94394	IS_216438_Aes_Skin_Mucus_lane_Pann_DB	1	0.00188726	6	8	53	0.40113	20 kDa
SRR8017_TRINITY_DN74840_c0_g1::SRR8017_TRINITY_DN74840_c0_g1_i1::g.116240::m.116240 [type:3prime_partial len:117 gc:universal SRR8017_TRINITY_DN74840_c0_g1_i1:349-2(-)]	type:3prime_partial len:117 gc:universal SRR8017_TRINITY_DN74840_c0_g1_i1:349-2(-)	SRR8017_TRINITY_DN74840_c0_g1::SRR8017_TRINITY_DN74840_c0_g1_i1::g.116240::m.116240	IS_216438_Aes_Skin_Mucus_lane_Pann_DB	1	0.000961436	6	12	27	0.482759	13 kDa
SRR7978_TRINITY_DN11440_c0_g1::SRR7978_TRINITY_DN11440_c0_g1_i1::g.32770::m.32770 [type:complete len:338 gc:universal SRR7978_TRINITY_DN11440_c0_g1_i1:669-1682(+)]	type:complete len:338 gc:universal SRR7978_TRINITY_DN11440_c0_g1_i1:669-1682(+)	SRR7978_TRINITY_DN11440_c0_g1::SRR7978_TRINITY_DN11440_c0_g1_i1::g.32770::m.32770	IS_216438_Aes_Skin_Mucus_lane_Pann_DB	1	0.000747783	11	15	21	0.445104	38 kDa
SRR1330_TRINITY_DN118385_c7_g1::SRR1330_TRINITY_DN118385_c7_g1_i1::g.244778::m.244778 [type:internal len:914 gc:universal SRR1330_TRINITY_DN118385_c7_g1_i1:1-2739(+)]	type:internal len:914 gc:universal SRR1330_TRINITY_DN118385_c7_g1_i1:1-2739(+)	SRR1330_TRINITY_DN118385_c7_g1::SRR1330_TRINITY_DN118385_c7_g1_i1::g.244778::m.244778	IS_216438_Aes_Skin_Mucus_lane_Pann_DB	1	0.000213652	3	3	6	0.0547645	101 kDa
SRR7978_TRINITY_DN18255_c6_g2::SRR7978_TRINITY_DN18255_c6_g2_i1::g.38397::m.38397 [type:complete len:498 gc:universal SRR7978_TRINITY_DN18255_c6_g2_i1:1796-303(-)]	type:complete len:498 gc:universal SRR7978_TRINITY_DN18255_c6_g2_i1:1796-303(-)	SRR7978_TRINITY_DN18255_c6_g2::SRR7978_TRINITY_DN18255_c6_g2_i1::g.38397::m.38397	IS_216438_Aes_Skin_Mucus_lane_Pann_DB	1	0.000890218	12	16	25	0.338028	56 kDa
SRR7980_TRINITY_DN18156_c4_g2::SRR7980_TRINITY_DN18156_c4_g2_i1::g.75303::m.75303 [type:complete len:1767 gc:universal SRR7980_TRINITY_DN18156_c4_g2_i1:208-5508(+)]	type:complete len:1767 gc:universal SRR7980_TRINITY_DN18156_c4_g2_i1:208-5508(+)	SRR7980_TRINITY_DN18156_c4_g2::SRR7980_TRINITY_DN18156_c4_g2_i1::g.75303::m.75303	IS_216438_Aes_Skin_Mucus_lane_Pann_DB	1	0.000712175	14	14	20	0.116082	208 kDa
sp|ALDOA_RABIT| [sp|ALDOA_RABIT|]	type:complete len:365 gc:universal SRR7914_TRINITY_DN29665_c3_g6_i1:350-1444(+)	SRR7914_TRINITY_DN29665_c3_g6::SRR7914_TRINITY_DN29665_c3_g6_i1::g.7308::m.7308	IS_216438_Aes_Skin_Mucus_lane_Pann_DB	1	0.00110387	15	19	31	0.475275	40 kDa
SRR7914_TRINITY_DN32362_c3_g4::SRR7914_TRINITY_DN32362_c3_g4_i2::g.2808::m.2808 [type:complete len:556 gc:universal SRR7914_TRINITY_DN32362_c3_g4_i2:342-2009(+)]	type:complete len:556 gc:universal SRR7914_TRINITY_DN32362_c3_g4_i2:342-2009(+)	SRR7914_TRINITY_DN32362_c3_g4::SRR7914_TRINITY_DN32362_c3_g4_i2::g.2808::m.2808	IS_216438_Aes_Skin_Mucus_lane_Pann_DB	1	0.0012107	14	18	34	0.371171	62 kDa
SRR7978_TRINITY_DN14411_c0_g1::SRR7978_TRINITY_DN14411_c0_g1_i1::g.31294::m.31294 [type:3prime_partial len:100 gc:universal SRR7978_TRINITY_DN14411_c0_g1_i1:297-1(-)]	type:3prime_partial len:100 gc:universal SRR7978_TRINITY_DN14411_c0_g1_i1:297-1(-)	SRR7978_TRINITY_DN14411_c0_g1::SRR7978_TRINITY_DN14411_c0_g1_i1::g.31294::m.31294	IS_216438_Aes_Skin_Mucus_lane_Pann_DB	1	0.000747783	6	11	21	0.424242	11 kDa
SRR1330_TRINITY_DN124323_c1_g1::SRR1330_TRINITY_DN124323_c1_g1_i1::g.210647::m.210647 [type:5prime_partial len:348 gc:universal SRR1330_TRINITY_DN124323_c1_g1_i1:1288-245(-)]	type:5prime_partial len:348 gc:universal SRR1330_TRINITY_DN124323_c1_g1_i1:1288-245(-)	SRR1330_TRINITY_DN124323_c1_g1::SRR1330_TRINITY_DN124323_c1_g1_i1::g.210647::m.210647	IS_216438_Aes_Skin_Mucus_lane_Pann_DB	1	0.000427305	5	6	12	0.175792	40 kDa
SRR7979_TRINITY_DN18040_c0_g2::SRR7979_TRINITY_DN18040_c0_g2_i1::g.68282::m.68282 [type:complete len:2639 gc:universal SRR7979_TRINITY_DN18040_c0_g2_i1:9513-1597(-)]	type:complete len:2639 gc:universal SRR7979_TRINITY_DN18040_c0_g2_i1:9513-1597(-)	SRR7979_TRINITY_DN18040_c0_g2::SRR7979_TRINITY_DN18040_c0_g2_i1::g.68282::m.68282	IS_216438_Aes_Skin_Mucus_lane_Pann_DB	1	0.000427305	8	8	12	0.0447309	281 kDa
SRR7979_TRINITY_DN16842_c3_g1::SRR7979_TRINITY_DN16842_c3_g1_i2::g.56019::m.56019 [type:complete len:165 gc:universal SRR7979_TRINITY_DN16842_c3_g1_i2:1297-1791(+)]	type:5prime_partial len:167 gc:universal SRR1329_TRINITY_DN355037_c7_g2_i11:704-204(-)	SRR1329_TRINITY_DN355037_c7_g2::SRR1329_TRINITY_DN355037_c7_g2_i11::g.184116::m.184116	IS_216438_Aes_Skin_Mucus_lane_Pann_DB	1	0.000747783	6	11	21	0.506024	19 kDa
SRR8017_TRINITY_DN6677_c0_g1::SRR8017_TRINITY_DN6677_c0_g1_i1::g.113437::m.113437 [type:complete len:106 gc:universal SRR8017_TRINITY_DN6677_c0_g1_i1:371-688(+)]	type:complete len:106 gc:universal SRR8017_TRINITY_DN6677_c0_g1_i1:371-688(+)	SRR8017_TRINITY_DN6677_c0_g1::SRR8017_TRINITY_DN6677_c0_g1_i1::g.113437::m.113437	IS_216438_Aes_Skin_Mucus_lane_Pann_DB	1	0.000640957	7	11	18	0.714286	12 kDa
SRR7914_TRINITY_DN49741_c0_g1::SRR7914_TRINITY_DN49741_c0_g1_i1::g.19143::m.19143 [type:3prime_partial len:457 gc:universal SRR7914_TRINITY_DN49741_c0_g1_i1:1368-1(-)]	type:complete len:699 gc:universal SRR7980_TRINITY_DN18546_c2_g1_i11:281-2377(+)	SRR7980_TRINITY_DN18546_c2_g1::SRR7980_TRINITY_DN18546_c2_g1_i11::g.84759::m.84759	IS_216438_Aes_Skin_Mucus_lane_Pann_DB	1	0.000925827	15	17	26	0.265043	78 kDa
SRR7978_TRINITY_DN39042_c0_g1::SRR7978_TRINITY_DN39042_c0_g1_i1::g.39245::m.39245 [type:internal len:116 gc:universal SRR7978_TRINITY_DN39042_c0_g1_i1:1-345(+)]	type:internal len:116 gc:universal SRR7978_TRINITY_DN39042_c0_g1_i1:1-345(+)	SRR7978_TRINITY_DN39042_c0_g1::SRR7978_TRINITY_DN39042_c0_g1_i1::g.39245::m.39245	IS_216438_Aes_Skin_Mucus_lane_Pann_DB	1	0.00320479	3	6	90	0.486957	12 kDa
SRR1330_TRINITY_DN120245_c11_g3::SRR1330_TRINITY_DN120245_c11_g3_i1::g.211565::m.211565 [type:complete len:574 gc:universal SRR1330_TRINITY_DN120245_c11_g3_i1:2111-390(-)]	type:complete len:574 gc:universal SRR1330_TRINITY_DN120245_c11_g3_i1:2111-390(-)	SRR1330_TRINITY_DN120245_c11_g3::SRR1330_TRINITY_DN120245_c11_g3_i1::g.211565::m.211565	IS_216438_Aes_Skin_Mucus_lane_Pann_DB	1	0.00106826	14	17	30	0.399651	61 kDa
SRR1330_TRINITY_DN119754_c11_g1::SRR1330_TRINITY_DN119754_c11_g1_i3::g.227809::m.227809 [type:3prime_partial len:1298 gc:universal SRR1330_TRINITY_DN119754_c11_g1_i3:202-4092(+)]	type:3prime_partial len:1298 gc:universal SRR1330_TRINITY_DN119754_c11_g1_i3:202-4092(+)	SRR1330_TRINITY_DN119754_c11_g1::SRR1330_TRINITY_DN119754_c11_g1_i3::g.227809::m.227809	IS_216438_Aes_Skin_Mucus_lane_Pann_DB	1	0.000498522	13	13	14	0.108712	151 kDa
SRR7979_TRINITY_DN16795_c0_g1::SRR7979_TRINITY_DN16795_c0_g1_i1::g.47091::m.47091 [type:5prime_partial len:859 gc:universal SRR7979_TRINITY_DN16795_c0_g1_i1:2998-422(-)]	type:5prime_partial len:859 gc:universal SRR7979_TRINITY_DN16795_c0_g1_i1:2998-422(-)	SRR7979_TRINITY_DN16795_c0_g1::SRR7979_TRINITY_DN16795_c0_g1_i1::g.47091::m.47091	IS_216438_Aes_Skin_Mucus_lane_Pann_DB	1	0.000427305	5	8	12	0.0885781	94 kDa
SRR7979_TRINITY_DN17321_c5_g1::SRR7979_TRINITY_DN17321_c5_g1_i2::g.66870::m.66870 [type:complete len:931 gc:universal SRR7979_TRINITY_DN17321_c5_g1_i2:182-2974(+)]	type:complete len:931 gc:universal SRR7979_TRINITY_DN17321_c5_g1_i2:182-2974(+)	SRR7979_TRINITY_DN17321_c5_g1::SRR7979_TRINITY_DN17321_c5_g1_i2::g.66870::m.66870	IS_216438_Aes_Skin_Mucus_lane_Pann_DB	1	0.000462914	7	9	13	0.126882	106 kDa
SRR8017_TRINITY_DN23749_c0_g1::SRR8017_TRINITY_DN23749_c0_g1_i1::g.111860::m.111860 [type:complete len:163 gc:universal SRR8017_TRINITY_DN23749_c0_g1_i1:1444-956(-)]	type:complete len:163 gc:universal SRR8017_TRINITY_DN23749_c0_g1_i1:1444-956(-)	SRR8017_TRINITY_DN23749_c0_g1::SRR8017_TRINITY_DN23749_c0_g1_i1::g.111860::m.111860	IS_216438_Aes_Skin_Mucus_lane_Pann_DB	1	0.000961436	11	16	27	0.709877	17 kDa
SRR1330_TRINITY_DN124323_c2_g2::SRR1330_TRINITY_DN124323_c2_g2_i3::g.210651::m.210651 [type:5prime_partial len:486 gc:universal SRR1330_TRINITY_DN124323_c2_g2_i3:3-1460(+)]	type:internal len:107 gc:universal SRR1330_TRINITY_DN124323_c2_g3_i2:318-1(-)	SRR1330_TRINITY_DN124323_c2_g3::SRR1330_TRINITY_DN124323_c2_g3_i2::g.210659::m.210659	IS_216438_Aes_Skin_Mucus_lane_Pann_DB	1	0.000783392	7	11	22	0.811321	12 kDa
SRR8017_TRINITY_DN26574_c4_g4::SRR8017_TRINITY_DN26574_c4_g4_i2::g.116904::m.116904 [type:complete len:455 gc:universal SRR8017_TRINITY_DN26574_c4_g4_i2:766-2130(+)]	type:complete len:455 gc:universal SRR8017_TRINITY_DN26574_c4_g4_i2:766-2130(+)	SRR8017_TRINITY_DN26574_c4_g4::SRR8017_TRINITY_DN26574_c4_g4_i2::g.116904::m.116904	IS_216438_Aes_Skin_Mucus_lane_Pann_DB	1	0.000997045	12	14	28	0.323789	51 kDa
SRR1330_TRINITY_DN103436_c0_g1::SRR1330_TRINITY_DN103436_c0_g1_i1::g.224133::m.224133 [type:complete len:322 gc:universal SRR1330_TRINITY_DN103436_c0_g1_i1:291-1256(+)]	type:complete len:322 gc:universal SRR1330_TRINITY_DN103436_c0_g1_i1:291-1256(+)	SRR1330_TRINITY_DN103436_c0_g1::SRR1330_TRINITY_DN103436_c0_g1_i1::g.224133::m.224133	IS_216438_Aes_Skin_Mucus_lane_Pann_DB	1	0.00056974	9	13	16	0.323988	36 kDa
SRR1330_TRINITY_DN157030_c0_g1::SRR1330_TRINITY_DN157030_c0_g1_i1::g.221227::m.221227 [type:3prime_partial len:599 gc:universal SRR1330_TRINITY_DN157030_c0_g1_i1:138-1931(+)]	type:3prime_partial len:599 gc:universal SRR1330_TRINITY_DN157030_c0_g1_i1:138-1931(+)	SRR1330_TRINITY_DN157030_c0_g1::SRR1330_TRINITY_DN157030_c0_g1_i1::g.221227::m.221227	IS_216438_Aes_Skin_Mucus_lane_Pann_DB	1	0.000142435	3	3	4	0.0602007	64 kDa
SRR1330_TRINITY_DN105931_c0_g1::SRR1330_TRINITY_DN105931_c0_g1_i1::g.231800::m.231800 [type:5prime_partial len:379 gc:universal SRR1330_TRINITY_DN105931_c0_g1_i1:1-1137(+)]	type:5prime_partial len:379 gc:universal SRR1330_TRINITY_DN105931_c0_g1_i1:1-1137(+)	SRR1330_TRINITY_DN105931_c0_g1::SRR1330_TRINITY_DN105931_c0_g1_i1::g.231800::m.231800	IS_216438_Aes_Skin_Mucus_lane_Pann_DB	1	0.000819001	10	12	23	0.354497	43 kDa
SRR8020_TRINITY_DN28917_c0_g1::SRR8020_TRINITY_DN28917_c0_g1_i2::g.147803::m.147803 [type:complete len:903 gc:universal SRR8020_TRINITY_DN28917_c0_g1_i2:351-3059(+)]	type:complete len:903 gc:universal SRR8020_TRINITY_DN28917_c0_g1_i2:351-3059(+)	SRR8020_TRINITY_DN28917_c0_g1::SRR8020_TRINITY_DN28917_c0_g1_i2::g.147803::m.147803	IS_216438_Aes_Skin_Mucus_lane_Pann_DB	1	0.00085461	9	9	24	0.271619	104 kDa
SRR1330_TRINITY_DN124323_c2_g2::SRR1330_TRINITY_DN124323_c2_g2_i7::g.210654::m.210654 [type:5prime_partial len:328 gc:universal SRR1330_TRINITY_DN124323_c2_g2_i7:3-986(+)]	type:3prime_partial len:155 gc:universal SRR8020_TRINITY_DN80519_c0_g1_i1:211-672(+)	SRR8020_TRINITY_DN80519_c0_g1::SRR8020_TRINITY_DN80519_c0_g1_i1::g.130757::m.130757	IS_216438_Aes_Skin_Mucus_lane_Pann_DB	1	0.000890218	3	5	25	0.564935	17 kDa
SRR7978_TRINITY_DN18459_c0_g1::SRR7978_TRINITY_DN18459_c0_g1_i1::g.35666::m.35666 [type:complete len:554 gc:universal SRR7978_TRINITY_DN18459_c0_g1_i1:376-2037(+)]	type:complete len:554 gc:universal SRR7978_TRINITY_DN18459_c0_g1_i1:376-2037(+)	SRR7978_TRINITY_DN18459_c0_g1::SRR7978_TRINITY_DN18459_c0_g1_i1::g.35666::m.35666	IS_216438_Aes_Skin_Mucus_lane_Pann_DB	1	0.000961436	11	13	27	0.341772	60 kDa
SRR8000_TRINITY_DN21849_c1_g2::SRR8000_TRINITY_DN21849_c1_g2_i6::g.95364::m.95364 [type:complete len:741 gc:universal SRR8000_TRINITY_DN21849_c1_g2_i6:3464-1242(-)]	type:complete len:706 gc:universal SRR8017_TRINITY_DN25757_c4_g1_i3:80-2197(+)	SRR8017_TRINITY_DN25757_c4_g1::SRR8017_TRINITY_DN25757_c4_g1_i3::g.118578::m.118578	IS_216438_Aes_Skin_Mucus_lane_Pann_DB	1	0.00103265	11	12	29	0.329078	78 kDa
SRR8000_TRINITY_DN21697_c1_g2::SRR8000_TRINITY_DN21697_c1_g2_i3::g.100338::m.100338 [type:complete len:139 gc:universal SRR8000_TRINITY_DN21697_c1_g2_i3:4880-4464(-)]	type:complete len:139 gc:universal SRR8000_TRINITY_DN21697_c1_g2_i3:4880-4464(-)	SRR8000_TRINITY_DN21697_c1_g2::SRR8000_TRINITY_DN21697_c1_g2_i3::g.100338::m.100338	IS_216438_Aes_Skin_Mucus_lane_Pann_DB	1	0.00028487	4	4	8	0.557971	15 kDa
SRR8017_TRINITY_DN24969_c9_g5::SRR8017_TRINITY_DN24969_c9_g5_i2::g.108983::m.108983 [type:complete len:233 gc:universal SRR8017_TRINITY_DN24969_c9_g5_i2:105-803(+)]	type:complete len:233 gc:universal SRR8017_TRINITY_DN24969_c9_g5_i2:105-803(+)	SRR8017_TRINITY_DN24969_c9_g5::SRR8017_TRINITY_DN24969_c9_g5_i2::g.108983::m.108983	IS_216438_Aes_Skin_Mucus_lane_Pann_DB	1	0.00149557	14	20	42	0.543103	27 kDa
SRR1330_TRINITY_DN115695_c12_g1::SRR1330_TRINITY_DN115695_c12_g1_i4::g.239330::m.239330 [type:5prime_partial len:226 gc:universal SRR1330_TRINITY_DN115695_c12_g1_i4:1099-422(-)]	type:5prime_partial len:226 gc:universal SRR1330_TRINITY_DN115695_c12_g1_i4:1099-422(-)	SRR1330_TRINITY_DN115695_c12_g1::SRR1330_TRINITY_DN115695_c12_g1_i4::g.239330::m.239330	IS_216438_Aes_Skin_Mucus_lane_Pann_DB	1	0.000213652	2	2	6	0.106667	25 kDa
SRR1329_TRINITY_DN341817_c10_g1::SRR1329_TRINITY_DN341817_c10_g1_i23::g.166403::m.166403 [type:5prime_partial len:266 gc:universal SRR1329_TRINITY_DN341817_c10_g1_i23:1-798(+)]	type:complete len:487 gc:universal SRR7979_TRINITY_DN17602_c1_g2_i1:245-1705(+)	SRR7979_TRINITY_DN17602_c1_g2::SRR7979_TRINITY_DN17602_c1_g2_i1::g.64557::m.64557	IS_216438_Aes_Skin_Mucus_lane_Pann_DB	1	0.00056974	8	10	16	0.222222	51 kDa
SRR7978_TRINITY_DN18621_c1_g1::SRR7978_TRINITY_DN18621_c1_g1_i1::g.32073::m.32073 [type:complete len:252 gc:universal SRR7978_TRINITY_DN18621_c1_g1_i1:3198-2443(-)]	type:complete len:252 gc:universal SRR7978_TRINITY_DN18621_c1_g1_i1:3198-2443(-)	SRR7978_TRINITY_DN18621_c1_g1::SRR7978_TRINITY_DN18621_c1_g1_i1::g.32073::m.32073	IS_216438_Aes_Skin_Mucus_lane_Pann_DB	1	0.000747783	5	7	21	0.338645	28 kDa
SRR1330_TRINITY_DN124781_c1_g1::SRR1330_TRINITY_DN124781_c1_g1_i14::g.225174::m.225174 [type:5prime_partial len:324 gc:universal SRR1330_TRINITY_DN124781_c1_g1_i14:3-974(+)]	type:5prime_partial len:324 gc:universal SRR1330_TRINITY_DN124781_c1_g1_i14:3-974(+)	SRR1330_TRINITY_DN124781_c1_g1::SRR1330_TRINITY_DN124781_c1_g1_i14::g.225174::m.225174	IS_216438_Aes_Skin_Mucus_lane_Pann_DB	1	0.00199409	3	5	56	0.167183	34 kDa
SRR1330_TRINITY_DN230844_c0_g1::SRR1330_TRINITY_DN230844_c0_g1_i1::g.269195::m.269195 [type:internal len:195 gc:universal SRR1330_TRINITY_DN230844_c0_g1_i1:584-3(-)]	type:internal len:195 gc:universal SRR1330_TRINITY_DN230844_c0_g1_i1:584-3(-)	SRR1330_TRINITY_DN230844_c0_g1::SRR1330_TRINITY_DN230844_c0_g1_i1::g.269195::m.269195	IS_216438_Aes_Skin_Mucus_lane_Pann_DB	1	0.000106826	3	3	3	0.242268	21 kDa
SRR7979_TRINITY_DN31917_c0_g1::SRR7979_TRINITY_DN31917_c0_g1_i1::g.62726::m.62726 [type:complete len:338 gc:universal SRR7979_TRINITY_DN31917_c0_g1_i1:329-1342(+)]	type:3prime_partial len:364 gc:universal SRR1330_TRINITY_DN124762_c3_g2_i7:1090-2(-)	SRR1330_TRINITY_DN124762_c3_g2::SRR1330_TRINITY_DN124762_c3_g2_i7::g.225315::m.225315	IS_216438_Aes_Skin_Mucus_lane_Pann_DB	1	0.00113948	18	23	32	0.721763	38 kDa
SRR7980_TRINITY_DN18081_c0_g1::SRR7980_TRINITY_DN18081_c0_g1_i1::g.92566::m.92566 [type:complete len:234 gc:universal SRR7980_TRINITY_DN18081_c0_g1_i1:184-885(+)]	type:complete len:234 gc:universal SRR7980_TRINITY_DN18081_c0_g1_i1:184-885(+)	SRR7980_TRINITY_DN18081_c0_g1::SRR7980_TRINITY_DN18081_c0_g1_i1::g.92566::m.92566	IS_216438_Aes_Skin_Mucus_lane_Pann_DB	1	0.000747783	9	12	21	0.51073	27 kDa
SRR7980_TRINITY_DN13938_c0_g1::SRR7980_TRINITY_DN13938_c0_g1_i1::g.78805::m.78805 [type:complete len:165 gc:universal SRR7980_TRINITY_DN13938_c0_g1_i1:794-300(-)]	type:complete len:165 gc:universal SRR7980_TRINITY_DN13938_c0_g1_i1:794-300(-)	SRR7980_TRINITY_DN13938_c0_g1::SRR7980_TRINITY_DN13938_c0_g1_i1::g.78805::m.78805	IS_216438_Aes_Skin_Mucus_lane_Pann_DB	1	0.000676566	4	6	19	0.27439	18 kDa
SRR8020_TRINITY_DN29026_c3_g1::SRR8020_TRINITY_DN29026_c3_g1_i3::g.139507::m.139507 [type:complete len:250 gc:universal SRR8020_TRINITY_DN29026_c3_g1_i3:495-1244(+)]	type:complete len:250 gc:universal SRR8020_TRINITY_DN29026_c3_g1_i3:495-1244(+)	SRR8020_TRINITY_DN29026_c3_g1::SRR8020_TRINITY_DN29026_c3_g1_i3::g.139507::m.139507	IS_216438_Aes_Skin_Mucus_lane_Pann_DB	1	0.00103265	5	8	29	0.477912	28 kDa
SRR8017_TRINITY_DN19637_c0_g1::SRR8017_TRINITY_DN19637_c0_g1_i1::g.108320::m.108320 [type:complete len:338 gc:universal SRR8017_TRINITY_DN19637_c0_g1_i1:206-1219(+)]	type:complete len:338 gc:universal SRR8017_TRINITY_DN19637_c0_g1_i1:206-1219(+)	SRR8017_TRINITY_DN19637_c0_g1::SRR8017_TRINITY_DN19637_c0_g1_i1::g.108320::m.108320	IS_216438_Aes_Skin_Mucus_lane_Pann_DB	1	0.000925827	4	5	26	0.305638	38 kDa
SRR7978_TRINITY_DN18673_c0_g4::SRR7978_TRINITY_DN18673_c0_g4_i8::g.32435::m.32435 [type:complete len:472 gc:universal SRR7978_TRINITY_DN18673_c0_g4_i8:2995-1580(-)]	type:complete len:472 gc:universal SRR7978_TRINITY_DN18673_c0_g4_i8:2995-1580(-)	SRR7978_TRINITY_DN18673_c0_g4::SRR7978_TRINITY_DN18673_c0_g4_i8::g.32435::m.32435	IS_216438_Aes_Skin_Mucus_lane_Pann_DB	1	0.000605348	9	13	17	0.292994	51 kDa
SRR8021_TRINITY_DN19509_c1_g2::SRR8021_TRINITY_DN19509_c1_g2_i1::g.160626::m.160626 [type:complete len:440 gc:universal SRR8021_TRINITY_DN19509_c1_g2_i1:108-1427(+)]	type:complete len:440 gc:universal SRR8021_TRINITY_DN19509_c1_g2_i1:108-1427(+)	SRR8021_TRINITY_DN19509_c1_g2::SRR8021_TRINITY_DN19509_c1_g2_i1::g.160626::m.160626	IS_216438_Aes_Skin_Mucus_lane_Pann_DB	1	0.000427305	8	10	12	0.323462	48 kDa
SRR7914_TRINITY_DN31419_c0_g1::SRR7914_TRINITY_DN31419_c0_g1_i1::g.8681::m.8681 [type:complete len:1005 gc:universal SRR7914_TRINITY_DN31419_c0_g1_i1:432-3446(+)]	type:complete len:1005 gc:universal SRR7914_TRINITY_DN31419_c0_g1_i1:432-3446(+)	SRR7914_TRINITY_DN31419_c0_g1::SRR7914_TRINITY_DN31419_c0_g1_i1::g.8681::m.8681	IS_216438_Aes_Skin_Mucus_lane_Pann_DB	1	0.000462914	10	10	13	0.146414	110 kDa
SRR8017_TRINITY_DN26300_c0_g1::SRR8017_TRINITY_DN26300_c0_g1_i9::g.112680::m.112680 [type:complete len:148 gc:universal SRR8017_TRINITY_DN26300_c0_g1_i9:762-319(-)]	type:complete len:148 gc:universal SRR8017_TRINITY_DN26300_c0_g1_i9:762-319(-)	SRR8017_TRINITY_DN26300_c0_g1::SRR8017_TRINITY_DN26300_c0_g1_i9::g.112680::m.112680	IS_216438_Aes_Skin_Mucus_lane_Pann_DB	1	0.000320479	2	2	9	0.333333	16 kDa
SRR8020_TRINITY_DN28615_c0_g1::SRR8020_TRINITY_DN28615_c0_g1_i3::g.138012::m.138012 [type:complete len:143 gc:universal SRR8020_TRINITY_DN28615_c0_g1_i3:75-503(+)]	type:complete len:143 gc:universal SRR8020_TRINITY_DN28615_c0_g1_i3:75-503(+)	SRR8020_TRINITY_DN28615_c0_g1::SRR8020_TRINITY_DN28615_c0_g1_i3::g.138012::m.138012	IS_216438_Aes_Skin_Mucus_lane_Pann_DB	1	0.00028487	2	5	8	0.288732	16 kDa
SRR7914_TRINITY_DN40275_c0_g1::SRR7914_TRINITY_DN40275_c0_g1_i1::g.3817::m.3817 [type:3prime_partial len:113 gc:universal SRR7914_TRINITY_DN40275_c0_g1_i1:337-2(-)]	type:complete len:177 gc:universal SRR7980_TRINITY_DN12577_c0_g1_i2:254-784(+)	SRR7980_TRINITY_DN12577_c0_g1::SRR7980_TRINITY_DN12577_c0_g1_i2::g.91912::m.91912	IS_216438_Aes_Skin_Mucus_lane_Pann_DB	1	0.000142435	3	3	4	0.227273	20 kDa
SRR7914_TRINITY_DN32278_c0_g1::SRR7914_TRINITY_DN32278_c0_g1_i2::g.20346::m.20346 [type:complete len:338 gc:universal SRR7914_TRINITY_DN32278_c0_g1_i2:184-1197(+)]	type:complete len:338 gc:universal SRR7914_TRINITY_DN32278_c0_g1_i2:184-1197(+)	SRR7914_TRINITY_DN32278_c0_g1::SRR7914_TRINITY_DN32278_c0_g1_i2::g.20346::m.20346	IS_216438_Aes_Skin_Mucus_lane_Pann_DB	1	0.000605348	8	8	17	0.385757	38 kDa
SRR8000_TRINITY_DN20943_c0_g1::SRR8000_TRINITY_DN20943_c0_g1_i7::g.96835::m.96835 [type:complete len:883 gc:universal SRR8000_TRINITY_DN20943_c0_g1_i7:7881-5233(-)]	type:complete len:936 gc:universal SRR7979_TRINITY_DN16473_c0_g1_i1:654-3461(+)	SRR7979_TRINITY_DN16473_c0_g1::SRR7979_TRINITY_DN16473_c0_g1_i1::g.68957::m.68957	IS_216438_Aes_Skin_Mucus_lane_Pann_DB	1	0.000534131	12	13	15	0.181818	105 kDa
SRR7979_TRINITY_DN16692_c0_g1::SRR7979_TRINITY_DN16692_c0_g1_i1::g.46052::m.46052 [type:complete len:608 gc:universal SRR7979_TRINITY_DN16692_c0_g1_i1:2431-608(-)]	type:complete len:608 gc:universal SRR7979_TRINITY_DN16692_c0_g1_i1:2431-608(-)	SRR7979_TRINITY_DN16692_c0_g1::SRR7979_TRINITY_DN16692_c0_g1_i1::g.46052::m.46052	IS_216438_Aes_Skin_Mucus_lane_Pann_DB	1	0.000640957	10	11	18	0.301483	66 kDa
SRR7914_TRINITY_DN30683_c4_g1::SRR7914_TRINITY_DN30683_c4_g1_i1::g.11713::m.11713 [type:complete len:807 gc:universal SRR7914_TRINITY_DN30683_c4_g1_i1:237-2657(+)]	type:complete len:807 gc:universal SRR7914_TRINITY_DN30683_c4_g1_i1:237-2657(+)	SRR7914_TRINITY_DN30683_c4_g1::SRR7914_TRINITY_DN30683_c4_g1_i1::g.11713::m.11713	IS_216438_Aes_Skin_Mucus_lane_Pann_DB	1	0.000747783	11	12	21	0.241935	89 kDa
SRR7978_TRINITY_DN19890_c6_g1::SRR7978_TRINITY_DN19890_c6_g1_i1::g.36705::m.36705 [type:complete len:177 gc:universal SRR7978_TRINITY_DN19890_c6_g1_i1:605-75(-)]	type:complete len:177 gc:universal SRR7978_TRINITY_DN19890_c6_g1_i1:605-75(-)	SRR7978_TRINITY_DN19890_c6_g1::SRR7978_TRINITY_DN19890_c6_g1_i1::g.36705::m.36705	IS_216438_Aes_Skin_Mucus_lane_Pann_DB	1	0.000783392	5	10	22	0.414773	20 kDa
SRR1330_TRINITY_DN113623_c0_g1::SRR1330_TRINITY_DN113623_c0_g1_i1::g.255960::m.255960 [type:5prime_partial len:201 gc:universal SRR1330_TRINITY_DN113623_c0_g1_i1:845-243(-)]	type:5prime_partial len:201 gc:universal SRR1330_TRINITY_DN113623_c0_g1_i1:845-243(-)	SRR1330_TRINITY_DN113623_c0_g1::SRR1330_TRINITY_DN113623_c0_g1_i1::g.255960::m.255960	IS_216438_Aes_Skin_Mucus_lane_Pann_DB	1	0.000534131	5	10	15	0.285	22 kDa
SRR7980_TRINITY_DN18792_c4_g2::SRR7980_TRINITY_DN18792_c4_g2_i1::g.79454::m.79454 [type:complete len:109 gc:universal SRR7980_TRINITY_DN18792_c4_g2_i1:146-472(+)]	type:complete len:109 gc:universal SRR7980_TRINITY_DN18792_c4_g2_i1:146-472(+)	SRR7980_TRINITY_DN18792_c4_g2::SRR7980_TRINITY_DN18792_c4_g2_i1::g.79454::m.79454	IS_216438_Aes_Skin_Mucus_lane_Pann_DB	1	0.000178044	2	3	5	0.324074	12 kDa
SRR7978_TRINITY_DN17027_c0_g1::SRR7978_TRINITY_DN17027_c0_g1_i1::g.43901::m.43901 [type:complete len:337 gc:universal SRR7978_TRINITY_DN17027_c0_g1_i1:1911-901(-)]	type:complete len:337 gc:universal SRR7978_TRINITY_DN17027_c0_g1_i1:1911-901(-)	SRR7978_TRINITY_DN17027_c0_g1::SRR7978_TRINITY_DN17027_c0_g1_i1::g.43901::m.43901	IS_216438_Aes_Skin_Mucus_lane_Pann_DB	1	0.000142435	2	3	4	0.0982143	37 kDa
SRR7980_TRINITY_DN29041_c0_g1::SRR7980_TRINITY_DN29041_c0_g1_i1::g.82865::m.82865 [type:complete len:300 gc:universal SRR7980_TRINITY_DN29041_c0_g1_i1:206-1105(+)]	type:5prime_partial len:483 gc:universal SRR1330_TRINITY_DN119139_c0_g1_i14:3-1451(+)	SRR1330_TRINITY_DN119139_c0_g1::SRR1330_TRINITY_DN119139_c0_g1_i14::g.245447::m.245447	IS_216438_Aes_Skin_Mucus_lane_Pann_DB	1	0.00156678	5	8	44	0.452282	54 kDa
SRR7914_TRINITY_DN29703_c10_g7::SRR7914_TRINITY_DN29703_c10_g7_i1::g.10358::m.10358 [type:complete len:171 gc:universal SRR7914_TRINITY_DN29703_c10_g7_i1:1194-682(-)]	type:complete len:171 gc:universal SRR7914_TRINITY_DN29703_c10_g7_i1:1194-682(-)	SRR7914_TRINITY_DN29703_c10_g7::SRR7914_TRINITY_DN29703_c10_g7_i1::g.10358::m.10358	IS_216438_Aes_Skin_Mucus_lane_Pann_DB	1	0.00106826	12	18	30	0.652941	19 kDa
SRR7980_TRINITY_DN13101_c0_g2::SRR7980_TRINITY_DN13101_c0_g2_i1::g.77380::m.77380 [type:complete len:325 gc:universal SRR7980_TRINITY_DN13101_c0_g2_i1:3329-2355(-)]	type:complete len:325 gc:universal SRR7980_TRINITY_DN13101_c0_g2_i1:3329-2355(-)	SRR7980_TRINITY_DN13101_c0_g2::SRR7980_TRINITY_DN13101_c0_g2_i1::g.77380::m.77380	IS_216438_Aes_Skin_Mucus_lane_Pann_DB	1	0.000676566	12	15	19	0.478395	36 kDa
SRR7980_TRINITY_DN29041_c0_g1::SRR7980_TRINITY_DN29041_c0_g1_i1::g.82865::m.82865 [type:complete len:300 gc:universal SRR7980_TRINITY_DN29041_c0_g1_i1:206-1105(+)]	type:5prime_partial len:446 gc:universal SRR8020_TRINITY_DN21157_c0_g1_i1:3-1340(+)	SRR8020_TRINITY_DN21157_c0_g1::SRR8020_TRINITY_DN21157_c0_g1_i1::g.135689::m.135689	IS_216438_Aes_Skin_Mucus_lane_Pann_DB	1	0.000320479	3	4	9	0.0966292	50 kDa
SRR7979_TRINITY_DN15021_c0_g1::SRR7979_TRINITY_DN15021_c0_g1_i2::g.61404::m.61404 [type:3prime_partial len:1450 gc:universal SRR7979_TRINITY_DN15021_c0_g1_i2:171-4517(+)]	type:complete len:2317 gc:universal SRR7979_TRINITY_DN15021_c0_g1_i3:171-7121(+)	SRR7979_TRINITY_DN15021_c0_g1::SRR7979_TRINITY_DN15021_c0_g1_i3::g.61405::m.61405	IS_216438_Aes_Skin_Mucus_lane_Pann_DB	1	0.00056974	3	3	16	0.0807427	264 kDa
SRR7979_TRINITY_DN17762_c4_g3::SRR7979_TRINITY_DN17762_c4_g3_i3::g.62933::m.62933 [type:complete len:245 gc:universal SRR7979_TRINITY_DN17762_c4_g3_i3:2738-2004(-)]	type:complete len:245 gc:universal SRR7979_TRINITY_DN17762_c4_g3_i3:2738-2004(-)	SRR7979_TRINITY_DN17762_c4_g3::SRR7979_TRINITY_DN17762_c4_g3_i3::g.62933::m.62933	IS_216438_Aes_Skin_Mucus_lane_Pann_DB	1	0.000819001	6	9	23	0.409836	28 kDa
SRR1330_TRINITY_DN121695_c10_g1::SRR1330_TRINITY_DN121695_c10_g1_i1::g.213297::m.213297 [type:5prime_partial len:405 gc:universal SRR1330_TRINITY_DN121695_c10_g1_i1:1451-237(-)]	type:5prime_partial len:405 gc:universal SRR1330_TRINITY_DN121695_c10_g1_i1:1451-237(-)	SRR1330_TRINITY_DN121695_c10_g1::SRR1330_TRINITY_DN121695_c10_g1_i1::g.213297::m.213297	IS_216438_Aes_Skin_Mucus_lane_Pann_DB	1	0.000249261	5	5	7	0.168317	45 kDa
SRR8021_TRINITY_DN6427_c0_g1::SRR8021_TRINITY_DN6427_c0_g1_i1::g.153632::m.153632 [type:complete len:134 gc:universal SRR8021_TRINITY_DN6427_c0_g1_i1:423-22(-)]	type:complete len:134 gc:universal SRR8021_TRINITY_DN6427_c0_g1_i1:423-22(-)	SRR8021_TRINITY_DN6427_c0_g1::SRR8021_TRINITY_DN6427_c0_g1_i1::g.153632::m.153632	IS_216438_Aes_Skin_Mucus_lane_Pann_DB	1	0.000213652	2	2	6	0.12782	15 kDa
SRR7980_TRINITY_DN19533_c1_g1::SRR7980_TRINITY_DN19533_c1_g1_i10::g.90352::m.90352 [type:complete len:638 gc:universal SRR7980_TRINITY_DN19533_c1_g1_i10:193-2106(+)]	type:complete len:638 gc:universal SRR7980_TRINITY_DN19533_c1_g1_i10:193-2106(+)	SRR7980_TRINITY_DN19533_c1_g1::SRR7980_TRINITY_DN19533_c1_g1_i10::g.90352::m.90352	IS_216438_Aes_Skin_Mucus_lane_Pann_DB	1	0.00103265	8	10	29	0.262166	70 kDa
SRR1329_TRINITY_DN350924_c6_g1::SRR1329_TRINITY_DN350924_c6_g1_i10::g.197321::m.197321 [type:complete len:216 gc:universal SRR1329_TRINITY_DN350924_c6_g1_i10:334-981(+)]	type:complete len:215 gc:universal SRR1330_TRINITY_DN121418_c1_g2_i2:123-767(+)	SRR1330_TRINITY_DN121418_c1_g2::SRR1330_TRINITY_DN121418_c1_g2_i2::g.248493::m.248493	IS_216438_Aes_Skin_Mucus_lane_Pann_DB	1	0.00131752	10	12	37	0.401869	25 kDa
SRR8020_TRINITY_DN30092_c0_g1::SRR8020_TRINITY_DN30092_c0_g1_i7::g.122208::m.122208 [type:complete len:131 gc:universal SRR8020_TRINITY_DN30092_c0_g1_i7:2629-3021(+)]	type:5prime_partial len:192 gc:universal SRR1329_TRINITY_DN354944_c3_g1_i6:697-122(-)	SRR1329_TRINITY_DN354944_c3_g1::SRR1329_TRINITY_DN354944_c3_g1_i6::g.184249::m.184249	IS_216438_Aes_Skin_Mucus_lane_Pann_DB	1	0.000676566	2	3	19	0.219895	20 kDa
SRR8017_TRINITY_DN25957_c5_g1::SRR8017_TRINITY_DN25957_c5_g1_i1::g.119706::m.119706 [type:complete len:726 gc:universal SRR8017_TRINITY_DN25957_c5_g1_i1:132-2309(+)]	type:complete len:726 gc:universal SRR8017_TRINITY_DN25957_c5_g1_i1:132-2309(+)	SRR8017_TRINITY_DN25957_c5_g1::SRR8017_TRINITY_DN25957_c5_g1_i1::g.119706::m.119706	IS_216438_Aes_Skin_Mucus_lane_Pann_DB	1	0.000712175	2	2	20	0.238621	80 kDa
SRR7979_TRINITY_DN16633_c0_g1::SRR7979_TRINITY_DN16633_c0_g1_i1::g.46114::m.46114 [type:complete len:522 gc:universal SRR7979_TRINITY_DN16633_c0_g1_i1:163-1728(+)]	type:complete len:522 gc:universal SRR7979_TRINITY_DN16633_c0_g1_i1:163-1728(+)	SRR7979_TRINITY_DN16633_c0_g1::SRR7979_TRINITY_DN16633_c0_g1_i1::g.46114::m.46114	IS_216438_Aes_Skin_Mucus_lane_Pann_DB	1	0.00138874	6	9	39	0.516315	56 kDa
SRR7914_TRINITY_DN31168_c3_g1::SRR7914_TRINITY_DN31168_c3_g1_i9::g.16457::m.16457 [type:complete len:272 gc:universal SRR7914_TRINITY_DN31168_c3_g1_i9:399-1214(+)]	type:complete len:434 gc:universal SRR7979_TRINITY_DN16899_c0_g1_i6:331-1632(+)	SRR7979_TRINITY_DN16899_c0_g1::SRR7979_TRINITY_DN16899_c0_g1_i6::g.56127::m.56127	IS_216438_Aes_Skin_Mucus_lane_Pann_DB	1	0.000178044	4	4	5	0.124711	48 kDa
SRR8020_TRINITY_DN30411_c5_g1::SRR8020_TRINITY_DN30411_c5_g1_i3::g.148206::m.148206 [type:complete len:647 gc:universal SRR8020_TRINITY_DN30411_c5_g1_i3:2082-142(-)]	type:complete len:668 gc:universal SRR7978_TRINITY_DN18595_c6_g1_i2:294-2297(+)	SRR7978_TRINITY_DN18595_c6_g1::SRR7978_TRINITY_DN18595_c6_g1_i2::g.37195::m.37195	IS_216438_Aes_Skin_Mucus_lane_Pann_DB	1	0.00149557	8	10	42	0.355322	73 kDa
SRR7979_TRINITY_DN17889_c5_g1::SRR7979_TRINITY_DN17889_c5_g1_i1::g.49262::m.49262 [type:complete len:600 gc:universal SRR7979_TRINITY_DN17889_c5_g1_i1:297-2096(+)]	type:complete len:600 gc:universal SRR7979_TRINITY_DN17889_c5_g1_i1:297-2096(+)	SRR7979_TRINITY_DN17889_c5_g1::SRR7979_TRINITY_DN17889_c5_g1_i1::g.49262::m.49262	IS_216438_Aes_Skin_Mucus_lane_Pann_DB	1	0.00117509	19	24	33	0.45409	65 kDa
SRR7914_TRINITY_DN30369_c2_g2::SRR7914_TRINITY_DN30369_c2_g2_i9::g.8016::m.8016 [type:complete len:107 gc:universal SRR7914_TRINITY_DN30369_c2_g2_i9:531-211(-)]	type:complete len:107 gc:universal SRR7914_TRINITY_DN30369_c2_g2_i9:531-211(-)	SRR7914_TRINITY_DN30369_c2_g2::SRR7914_TRINITY_DN30369_c2_g2_i9::g.8016::m.8016	IS_216438_Aes_Skin_Mucus_lane_Pann_DB	1	0.000320479	4	5	9	0.424528	12 kDa
SRR7980_TRINITY_DN19481_c4_g4::SRR7980_TRINITY_DN19481_c4_g4_i1::g.93885::m.93885 [type:complete len:418 gc:universal SRR7980_TRINITY_DN19481_c4_g4_i1:1914-661(-)]	type:complete len:418 gc:universal SRR7980_TRINITY_DN19481_c4_g4_i1:1914-661(-)	SRR7980_TRINITY_DN19481_c4_g4::SRR7980_TRINITY_DN19481_c4_g4_i1::g.93885::m.93885	IS_216438_Aes_Skin_Mucus_lane_Pann_DB	1	0.000498522	5	6	14	0.36211	45 kDa
SRR7979_TRINITY_DN18976_c0_g1::SRR7979_TRINITY_DN18976_c0_g1_i5::g.56802::m.56802 [type:complete len:506 gc:universal SRR7979_TRINITY_DN18976_c0_g1_i5:138-1655(+)]	type:complete len:512 gc:universal SRR7979_TRINITY_DN18976_c0_g1_i4:138-1673(+)	SRR7979_TRINITY_DN18976_c0_g1::SRR7979_TRINITY_DN18976_c0_g1_i4::g.56799::m.56799	IS_216438_Aes_Skin_Mucus_lane_Pann_DB	1	0.00056974	8	11	16	0.227006	58 kDa
SRR8017_TRINITY_DN26159_c3_g5::SRR8017_TRINITY_DN26159_c3_g5_i1::g.121092::m.121092 [type:complete len:623 gc:universal SRR8017_TRINITY_DN26159_c3_g5_i1:1973-105(-)]	type:complete len:580 gc:universal SRR8020_TRINITY_DN25669_c0_g1_i1:451-2190(+)	SRR8020_TRINITY_DN25669_c0_g1::SRR8020_TRINITY_DN25669_c0_g1_i1::g.131810::m.131810	IS_216438_Aes_Skin_Mucus_lane_Pann_DB	1	0.000925827	16	19	26	0.445596	64 kDa
SRR7914_TRINITY_DN41065_c0_g1::SRR7914_TRINITY_DN41065_c0_g1_i1::g.23775::m.23775 [type:complete len:228 gc:universal SRR7914_TRINITY_DN41065_c0_g1_i1:903-220(-)]	type:complete len:228 gc:universal SRR7914_TRINITY_DN41065_c0_g1_i1:903-220(-)	SRR7914_TRINITY_DN41065_c0_g1::SRR7914_TRINITY_DN41065_c0_g1_i1::g.23775::m.23775	IS_216438_Aes_Skin_Mucus_lane_Pann_DB	1	0.000178044	4	5	5	0.189427	26 kDa
SRR7914_TRINITY_DN30630_c1_g2::SRR7914_TRINITY_DN30630_c1_g2_i1::g.11740::m.11740 [type:5prime_partial len:1249 gc:universal SRR7914_TRINITY_DN30630_c1_g2_i1:2-3748(+)]	type:complete len:1955 gc:universal SRR7978_TRINITY_DN19358_c0_g1_i3:10950-5086(-)	SRR7978_TRINITY_DN19358_c0_g1::SRR7978_TRINITY_DN19358_c0_g1_i3::g.40950::m.40950	IS_216438_Aes_Skin_Mucus_lane_Pann_DB	1	0.00167361	17	18	47	0.252303	226 kDa
SRR7979_TRINITY_DN17396_c0_g1::SRR7979_TRINITY_DN17396_c0_g1_i1::g.66618::m.66618 [type:complete len:494 gc:universal SRR7979_TRINITY_DN17396_c0_g1_i1:863-2344(+)]	type:complete len:494 gc:universal SRR7979_TRINITY_DN17396_c0_g1_i1:863-2344(+)	SRR7979_TRINITY_DN17396_c0_g1::SRR7979_TRINITY_DN17396_c0_g1_i1::g.66618::m.66618	IS_216438_Aes_Skin_Mucus_lane_Pann_DB	1	0.000427305	8	8	12	0.261663	55 kDa
SRR8017_TRINITY_DN22234_c0_g1::SRR8017_TRINITY_DN22234_c0_g1_i1::g.115996::m.115996 [type:complete len:195 gc:universal SRR8017_TRINITY_DN22234_c0_g1_i1:162-746(+)]	type:complete len:630 gc:universal SRR7978_TRINITY_DN18416_c1_g1_i3:1337-3226(+)	SRR7978_TRINITY_DN18416_c1_g1::SRR7978_TRINITY_DN18416_c1_g1_i3::g.35423::m.35423	IS_216438_Aes_Skin_Mucus_lane_Pann_DB	1	0.00113948	9	17	32	0.17965	70 kDa
SRR1330_TRINITY_DN296737_c0_g1::SRR1330_TRINITY_DN296737_c0_g1_i1::g.267488::m.267488 [type:internal len:277 gc:universal SRR1330_TRINITY_DN296737_c0_g1_i1:2-829(+)]	type:internal len:277 gc:universal SRR1330_TRINITY_DN296737_c0_g1_i1:2-829(+)	SRR1330_TRINITY_DN296737_c0_g1::SRR1330_TRINITY_DN296737_c0_g1_i1::g.267488::m.267488	IS_216438_Aes_Skin_Mucus_lane_Pann_DB	1	7.12175e-05	2	2	2	0.0869565	30 kDa
SRR8021_TRINITY_DN21519_c2_g2::SRR8021_TRINITY_DN21519_c2_g2_i3::g.156231::m.156231 [type:complete len:388 gc:universal SRR8021_TRINITY_DN21519_c2_g2_i3:3758-2595(-)]	type:complete len:473 gc:universal SRR1329_TRINITY_DN355673_c6_g1_i24:134-1552(+)	SRR1329_TRINITY_DN355673_c6_g1::SRR1329_TRINITY_DN355673_c6_g1_i24::g.174700::m.174700	IS_216438_Aes_Skin_Mucus_lane_Pann_DB	1	0.000356087	6	7	10	0.188559	54 kDa
SRR7979_TRINITY_DN17782_c2_g2::SRR7979_TRINITY_DN17782_c2_g2_i4::g.63140::m.63140 [type:complete len:102 gc:universal SRR7979_TRINITY_DN17782_c2_g2_i4:311-616(+)]	type:complete len:102 gc:universal SRR7979_TRINITY_DN17782_c2_g2_i4:311-616(+)	SRR7979_TRINITY_DN17782_c2_g2::SRR7979_TRINITY_DN17782_c2_g2_i4::g.63140::m.63140	IS_216438_Aes_Skin_Mucus_lane_Pann_DB	1	0.000640957	6	10	18	0.841584	11 kDa
SRR1329_TRINITY_DN339909_c0_g1::SRR1329_TRINITY_DN339909_c0_g1_i1::g.183463::m.183463 [type:complete len:429 gc:universal SRR1329_TRINITY_DN339909_c0_g1_i1:168-1454(+)]	type:complete len:429 gc:universal SRR1329_TRINITY_DN339909_c0_g1_i1:168-1454(+)	SRR1329_TRINITY_DN339909_c0_g1::SRR1329_TRINITY_DN339909_c0_g1_i1::g.183463::m.183463	IS_216438_Aes_Skin_Mucus_lane_Pann_DB	1	0.000462914	9	10	13	0.32243	47 kDa
SRR7979_TRINITY_DN19236_c4_g5::SRR7979_TRINITY_DN19236_c4_g5_i3::g.52841::m.52841 [type:complete len:228 gc:universal SRR7979_TRINITY_DN19236_c4_g5_i3:462-1145(+)]	type:internal len:199 gc:universal SRR1329_TRINITY_DN349465_c0_g1_i14:595-2(-)	SRR1329_TRINITY_DN349465_c0_g1::SRR1329_TRINITY_DN349465_c0_g1_i14::g.191621::m.191621	IS_216438_Aes_Skin_Mucus_lane_Pann_DB	1	0.00085461	7	11	24	0.424242	23 kDa
SRR7978_TRINITY_DN2685_c0_g1::SRR7978_TRINITY_DN2685_c0_g1_i1::g.41625::m.41625 [type:complete len:736 gc:universal SRR7978_TRINITY_DN2685_c0_g1_i1:309-2516(+)]	type:complete len:736 gc:universal SRR7978_TRINITY_DN2685_c0_g1_i1:309-2516(+)	SRR7978_TRINITY_DN2685_c0_g1::SRR7978_TRINITY_DN2685_c0_g1_i1::g.41625::m.41625	IS_216438_Aes_Skin_Mucus_lane_Pann_DB	1	0.000178044	4	4	5	0.0761905	81 kDa
SRR7979_TRINITY_DN17453_c4_g1::SRR7979_TRINITY_DN17453_c4_g1_i1::g.57794::m.57794 [type:complete len:324 gc:universal SRR7979_TRINITY_DN17453_c4_g1_i1:233-1204(+)]	type:complete len:324 gc:universal SRR7979_TRINITY_DN17453_c4_g1_i1:233-1204(+)	SRR7979_TRINITY_DN17453_c4_g1::SRR7979_TRINITY_DN17453_c4_g1_i1::g.57794::m.57794	IS_216438_Aes_Skin_Mucus_lane_Pann_DB	1	0.000534131	5	7	15	0.219814	36 kDa
SRR7978_TRINITY_DN16429_c0_g1::SRR7978_TRINITY_DN16429_c0_g1_i2::g.44517::m.44517 [type:complete len:250 gc:universal SRR7978_TRINITY_DN16429_c0_g1_i2:1513-764(-)]	type:complete len:250 gc:universal SRR7978_TRINITY_DN16429_c0_g1_i2:1513-764(-)	SRR7978_TRINITY_DN16429_c0_g1::SRR7978_TRINITY_DN16429_c0_g1_i2::g.44517::m.44517	IS_216438_Aes_Skin_Mucus_lane_Pann_DB	1	0.00117509	7	10	33	0.682731	27 kDa
SRR8000_TRINITY_DN22253_c8_g6::SRR8000_TRINITY_DN22253_c8_g6_i1::g.99166::m.99166 [type:complete len:340 gc:universal SRR8000_TRINITY_DN22253_c8_g6_i1:276-1295(+)]	type:complete len:340 gc:universal SRR8000_TRINITY_DN22253_c8_g6_i1:276-1295(+)	SRR8000_TRINITY_DN22253_c8_g6::SRR8000_TRINITY_DN22253_c8_g6_i1::g.99166::m.99166	IS_216438_Aes_Skin_Mucus_lane_Pann_DB	1	0.000427305	7	8	12	0.324484	37 kDa
SRR8017_TRINITY_DN50016_c0_g1::SRR8017_TRINITY_DN50016_c0_g1_i1::g.102936::m.102936 [type:internal len:122 gc:universal SRR8017_TRINITY_DN50016_c0_g1_i1:3-365(+)]	type:internal len:122 gc:universal SRR8017_TRINITY_DN50016_c0_g1_i1:3-365(+)	SRR8017_TRINITY_DN50016_c0_g1::SRR8017_TRINITY_DN50016_c0_g1_i1::g.102936::m.102936	IS_216438_Aes_Skin_Mucus_lane_Pann_DB	1	0.00028487	2	3	8	0.14876	13 kDa
SRR7979_TRINITY_DN16397_c0_g1::SRR7979_TRINITY_DN16397_c0_g1_i1::g.46536::m.46536 [type:complete len:127 gc:universal SRR7979_TRINITY_DN16397_c0_g1_i1:864-484(-)]	type:complete len:127 gc:universal SRR7979_TRINITY_DN16397_c0_g1_i1:864-484(-)	SRR7979_TRINITY_DN16397_c0_g1::SRR7979_TRINITY_DN16397_c0_g1_i1::g.46536::m.46536	IS_216438_Aes_Skin_Mucus_lane_Pann_DB	1	0.00224335	1	3	63	0.619048	14 kDa
SRR7980_TRINITY_DN16795_c0_g1::SRR7980_TRINITY_DN16795_c0_g1_i1::g.71453::m.71453 [type:complete len:429 gc:universal SRR7980_TRINITY_DN16795_c0_g1_i1:93-1379(+)]	type:complete len:429 gc:universal SRR7980_TRINITY_DN16795_c0_g1_i1:93-1379(+)	SRR7980_TRINITY_DN16795_c0_g1::SRR7980_TRINITY_DN16795_c0_g1_i1::g.71453::m.71453	IS_216438_Aes_Skin_Mucus_lane_Pann_DB	1	0.00056974	4	5	16	0.331776	48 kDa
SRR8017_TRINITY_DN23242_c0_g1::SRR8017_TRINITY_DN23242_c0_g1_i2::g.120380::m.120380 [type:5prime_partial len:434 gc:universal SRR8017_TRINITY_DN23242_c0_g1_i2:1-1302(+)]	type:5prime_partial len:434 gc:universal SRR8017_TRINITY_DN23242_c0_g1_i2:1-1302(+)	SRR8017_TRINITY_DN23242_c0_g1::SRR8017_TRINITY_DN23242_c0_g1_i2::g.120380::m.120380	IS_216438_Aes_Skin_Mucus_lane_Pann_DB	1	0.000320479	5	6	9	0.138568	47 kDa
SRR7980_TRINITY_DN16696_c0_g1::SRR7980_TRINITY_DN16696_c0_g1_i1::g.70505::m.70505 [type:internal len:814 gc:universal SRR7980_TRINITY_DN16696_c0_g1_i1:3-2441(+)]	type:internal len:1043 gc:universal SRR8021_TRINITY_DN20117_c0_g1_i10:1-3126(+)	SRR8021_TRINITY_DN20117_c0_g1::SRR8021_TRINITY_DN20117_c0_g1_i10::g.159482::m.159482	IS_216438_Aes_Skin_Mucus_lane_Pann_DB	1	0.000142435	2	2	4	0.0364683	108 kDa
SRR1330_TRINITY_DN124323_c2_g2::SRR1330_TRINITY_DN124323_c2_g2_i7::g.210654::m.210654 [type:5prime_partial len:328 gc:universal SRR1330_TRINITY_DN124323_c2_g2_i7:3-986(+)]	type:5prime_partial len:328 gc:universal SRR1330_TRINITY_DN124323_c2_g2_i7:3-986(+)	SRR1330_TRINITY_DN124323_c2_g2::SRR1330_TRINITY_DN124323_c2_g2_i7::g.210654::m.210654	IS_216438_Aes_Skin_Mucus_lane_Pann_DB	1	0.00103265	2	3	29	0.314985	35 kDa
SRR7979_TRINITY_DN15409_c0_g1::SRR7979_TRINITY_DN15409_c0_g1_i1::g.54749::m.54749 [type:complete len:199 gc:universal SRR7979_TRINITY_DN15409_c0_g1_i1:1062-466(-)]	type:complete len:199 gc:universal SRR7979_TRINITY_DN15409_c0_g1_i1:1062-466(-)	SRR7979_TRINITY_DN15409_c0_g1::SRR7979_TRINITY_DN15409_c0_g1_i1::g.54749::m.54749	IS_216438_Aes_Skin_Mucus_lane_Pann_DB	1	0.000213652	5	5	6	0.29798	22 kDa
SRR7914_TRINITY_DN31560_c4_g2::SRR7914_TRINITY_DN31560_c4_g2_i3::g.9700::m.9700 [type:complete len:473 gc:universal SRR7914_TRINITY_DN31560_c4_g2_i3:69-1487(+)]	type:complete len:473 gc:universal SRR7914_TRINITY_DN31560_c4_g2_i3:69-1487(+)	SRR7914_TRINITY_DN31560_c4_g2::SRR7914_TRINITY_DN31560_c4_g2_i3::g.9700::m.9700	IS_216438_Aes_Skin_Mucus_lane_Pann_DB	1	0.00028487	5	6	8	0.152542	46 kDa
SRR8017_TRINITY_DN24885_c0_g1::SRR8017_TRINITY_DN24885_c0_g1_i1::g.106192::m.106192 [type:complete len:333 gc:universal SRR8017_TRINITY_DN24885_c0_g1_i1:214-1212(+)]	type:complete len:333 gc:universal SRR8017_TRINITY_DN24885_c0_g1_i1:214-1212(+)	SRR8017_TRINITY_DN24885_c0_g1::SRR8017_TRINITY_DN24885_c0_g1_i1::g.106192::m.106192	IS_216438_Aes_Skin_Mucus_lane_Pann_DB	1	0.00028487	5	6	8	0.304217	36 kDa
SRR7979_TRINITY_DN17842_c2_g1::SRR7979_TRINITY_DN17842_c2_g1_i1::g.48740::m.48740 [type:complete len:1156 gc:universal SRR7979_TRINITY_DN17842_c2_g1_i1:286-3753(+)]	type:complete len:1156 gc:universal SRR7979_TRINITY_DN17842_c2_g1_i1:286-3753(+)	SRR7979_TRINITY_DN17842_c2_g1::SRR7979_TRINITY_DN17842_c2_g1_i1::g.48740::m.48740	IS_216438_Aes_Skin_Mucus_lane_Pann_DB	1	0.000462914	7	8	13	0.0848485	121 kDa
SRR7914_TRINITY_DN29064_c0_g1::SRR7914_TRINITY_DN29064_c0_g1_i1::g.15486::m.15486 [type:complete len:225 gc:universal SRR7914_TRINITY_DN29064_c0_g1_i1:1952-1278(-)]	type:5prime_partial len:653 gc:universal SRR1330_TRINITY_DN119115_c22_g2_i1:3-1961(+)	SRR1330_TRINITY_DN119115_c22_g2::SRR1330_TRINITY_DN119115_c22_g2_i1::g.245259::m.245259	IS_216438_Aes_Skin_Mucus_lane_Pann_DB	1	0.000961436	12	14	27	0.302147	73 kDa
SRR7978_TRINITY_DN18206_c4_g2::SRR7978_TRINITY_DN18206_c4_g2_i6::g.38573::m.38573 [type:5prime_partial len:271 gc:universal SRR7978_TRINITY_DN18206_c4_g2_i6:1515-703(-)]	type:5prime_partial len:230 gc:universal SRR7980_TRINITY_DN18425_c5_g1_i8:1594-905(-)	SRR7980_TRINITY_DN18425_c5_g1::SRR7980_TRINITY_DN18425_c5_g1_i8::g.82789::m.82789	IS_216438_Aes_Skin_Mucus_lane_Pann_DB	1	0.000925827	6	8	26	0.366812	25 kDa
SRR8017_TRINITY_DN24701_c6_g4::SRR8017_TRINITY_DN24701_c6_g4_i1::g.119068::m.119068 [type:complete len:413 gc:universal SRR8017_TRINITY_DN24701_c6_g4_i1:218-1456(+)]	type:complete len:413 gc:universal SRR8017_TRINITY_DN24701_c6_g4_i1:218-1456(+)	SRR8017_TRINITY_DN24701_c6_g4::SRR8017_TRINITY_DN24701_c6_g4_i1::g.119068::m.119068	IS_216438_Aes_Skin_Mucus_lane_Pann_DB	1	0.000142435	4	4	4	0.148058	48 kDa
SRR8000_TRINITY_DN26888_c0_g1::SRR8000_TRINITY_DN26888_c0_g1_i1::g.97289::m.97289 [type:complete len:459 gc:universal SRR8000_TRINITY_DN26888_c0_g1_i1:1541-165(-)]	type:complete len:459 gc:universal SRR8000_TRINITY_DN26888_c0_g1_i1:1541-165(-)	SRR8000_TRINITY_DN26888_c0_g1::SRR8000_TRINITY_DN26888_c0_g1_i1::g.97289::m.97289	IS_216438_Aes_Skin_Mucus_lane_Pann_DB	1	0.000498522	7	8	14	0.207424	51 kDa
SRR1329_TRINITY_DN355206_c6_g2::SRR1329_TRINITY_DN355206_c6_g2_i2::g.178512::m.178512 [type:complete len:437 gc:universal SRR1329_TRINITY_DN355206_c6_g2_i2:1626-316(-)]	type:complete len:437 gc:universal SRR1329_TRINITY_DN355206_c6_g2_i2:1626-316(-)	SRR1329_TRINITY_DN355206_c6_g2::SRR1329_TRINITY_DN355206_c6_g2_i2::g.178512::m.178512	IS_216438_Aes_Skin_Mucus_lane_Pann_DB	1	0.000142435	4	4	4	0.149083	51 kDa
SRR8020_TRINITY_DN28342_c3_g3::SRR8020_TRINITY_DN28342_c3_g3_i14::g.123020::m.123020 [type:complete len:190 gc:universal SRR8020_TRINITY_DN28342_c3_g3_i14:1633-1064(-)]	type:complete len:190 gc:universal SRR8020_TRINITY_DN28342_c3_g3_i14:1633-1064(-)	SRR8020_TRINITY_DN28342_c3_g3::SRR8020_TRINITY_DN28342_c3_g3_i14::g.123020::m.123020	IS_216438_Aes_Skin_Mucus_lane_Pann_DB	1	0.000819001	8	14	23	0.555556	20 kDa
SRR8020_TRINITY_DN27793_c1_g3::SRR8020_TRINITY_DN27793_c1_g3_i2::g.131334::m.131334 [type:complete len:335 gc:universal SRR8020_TRINITY_DN27793_c1_g3_i2:4133-3129(-)]	type:complete len:335 gc:universal SRR8020_TRINITY_DN27793_c1_g3_i2:4133-3129(-)	SRR8020_TRINITY_DN27793_c1_g3::SRR8020_TRINITY_DN27793_c1_g3_i2::g.131334::m.131334	IS_216438_Aes_Skin_Mucus_lane_Pann_DB	1	0.000249261	6	6	7	0.212575	37 kDa
SRR8020_TRINITY_DN26101_c0_g1::SRR8020_TRINITY_DN26101_c0_g1_i1::g.149579::m.149579 [type:complete len:187 gc:universal SRR8020_TRINITY_DN26101_c0_g1_i1:1185-625(-)]	type:complete len:187 gc:universal SRR8020_TRINITY_DN26101_c0_g1_i1:1185-625(-)	SRR8020_TRINITY_DN26101_c0_g1::SRR8020_TRINITY_DN26101_c0_g1_i1::g.149579::m.149579	IS_216438_Aes_Skin_Mucus_lane_Pann_DB	1	0.000249261	5	6	7	0.435484	21 kDa
SRR1330_TRINITY_DN121975_c0_g1::SRR1330_TRINITY_DN121975_c0_g1_i1::g.246745::m.246745 [type:5prime_partial len:189 gc:universal SRR1330_TRINITY_DN121975_c0_g1_i1:866-300(-)]	type:5prime_partial len:189 gc:universal SRR1330_TRINITY_DN121975_c0_g1_i1:866-300(-)	SRR1330_TRINITY_DN121975_c0_g1::SRR1330_TRINITY_DN121975_c0_g1_i1::g.246745::m.246745	IS_216438_Aes_Skin_Mucus_lane_Pann_DB	1	0.000997045	3	5	28	0.234043	20 kDa
SRR8020_TRINITY_DN23898_c0_g1::SRR8020_TRINITY_DN23898_c0_g1_i1::g.134782::m.134782 [type:complete len:532 gc:universal SRR8020_TRINITY_DN23898_c0_g1_i1:351-1946(+)]	type:complete len:532 gc:universal SRR8020_TRINITY_DN23898_c0_g1_i1:351-1946(+)	SRR8020_TRINITY_DN23898_c0_g1::SRR8020_TRINITY_DN23898_c0_g1_i1::g.134782::m.134782	IS_216438_Aes_Skin_Mucus_lane_Pann_DB	1	0.000605348	10	12	17	0.340866	58 kDa
SRR1330_TRINITY_DN115159_c0_g1::SRR1330_TRINITY_DN115159_c0_g1_i4::g.228676::m.228676 [type:complete len:724 gc:universal SRR1330_TRINITY_DN115159_c0_g1_i4:43-2214(+)]	type:complete len:724 gc:universal SRR1330_TRINITY_DN115159_c0_g1_i4:43-2214(+)	SRR1330_TRINITY_DN115159_c0_g1::SRR1330_TRINITY_DN115159_c0_g1_i4::g.228676::m.228676	IS_216438_Aes_Skin_Mucus_lane_Pann_DB	1	0.000142435	2	2	4	0.0359613	83 kDa
SRR8021_TRINITY_DN21287_c1_g1::SRR8021_TRINITY_DN21287_c1_g1_i4::g.157351::m.157351 [type:5prime_partial len:171 gc:universal SRR8021_TRINITY_DN21287_c1_g1_i4:1-513(+)]	type:5prime_partial len:310 gc:universal SRR7979_TRINITY_DN18206_c2_g2_i2:2000-1071(-)	SRR7979_TRINITY_DN18206_c2_g2::SRR7979_TRINITY_DN18206_c2_g2_i2::g.61932::m.61932	IS_216438_Aes_Skin_Mucus_lane_Pann_DB	1	0.00085461	8	10	24	0.466019	33 kDa
SRR1330_TRINITY_DN120434_c0_g1::SRR1330_TRINITY_DN120434_c0_g1_i2::g.255521::m.255521 [type:complete len:521 gc:universal SRR1330_TRINITY_DN120434_c0_g1_i2:290-1852(+)]	type:complete len:521 gc:universal SRR1330_TRINITY_DN120434_c0_g1_i2:290-1852(+)	SRR1330_TRINITY_DN120434_c0_g1::SRR1330_TRINITY_DN120434_c0_g1_i2::g.255521::m.255521	IS_216438_Aes_Skin_Mucus_lane_Pann_DB	1	0.00106826	2	2	30	0.407692	56 kDa
SRR7979_TRINITY_DN18638_c0_g6::SRR7979_TRINITY_DN18638_c0_g6_i1::g.53919::m.53919 [type:complete len:272 gc:universal SRR7979_TRINITY_DN18638_c0_g6_i1:225-1040(+)]	type:complete len:272 gc:universal SRR7979_TRINITY_DN18638_c0_g6_i1:225-1040(+)	SRR7979_TRINITY_DN18638_c0_g6::SRR7979_TRINITY_DN18638_c0_g6_i1::g.53919::m.53919	IS_216438_Aes_Skin_Mucus_lane_Pann_DB	1	0.000356087	4	5	10	0.236162	29 kDa
SRR7914_TRINITY_DN32035_c9_g1::SRR7914_TRINITY_DN32035_c9_g1_i3::g.12362::m.12362 [type:complete len:231 gc:universal SRR7914_TRINITY_DN32035_c9_g1_i3:823-131(-)]	type:complete len:231 gc:universal SRR7914_TRINITY_DN32035_c9_g1_i3:823-131(-)	SRR7914_TRINITY_DN32035_c9_g1::SRR7914_TRINITY_DN32035_c9_g1_i3::g.12362::m.12362	IS_216438_Aes_Skin_Mucus_lane_Pann_DB	1	0.000249261	5	6	7	0.308696	26 kDa
SRR8021_TRINITY_DN36390_c0_g1::SRR8021_TRINITY_DN36390_c0_g1_i1::g.158516::m.158516 [type:complete len:103 gc:universal SRR8021_TRINITY_DN36390_c0_g1_i1:332-640(+)]	type:complete len:103 gc:universal SRR8017_TRINITY_DN25611_c6_g3_i3:1155-847(-)	SRR8017_TRINITY_DN25611_c6_g3::SRR8017_TRINITY_DN25611_c6_g3_i3::g.107852::m.107852	IS_216438_Aes_Skin_Mucus_lane_Pann_DB	1	0.000462914	4	8	13	0.519608	12 kDa
SRR1330_TRINITY_DN116285_c12_g1::SRR1330_TRINITY_DN116285_c12_g1_i4::g.232996::m.232996 [type:5prime_partial len:174 gc:universal SRR1330_TRINITY_DN116285_c12_g1_i4:846-325(-)]	type:complete len:143 gc:universal SRR7979_TRINITY_DN18495_c5_g1_i1:263-691(+)	SRR7979_TRINITY_DN18495_c5_g1::SRR7979_TRINITY_DN18495_c5_g1_i1::g.58621::m.58621	IS_216438_Aes_Skin_Mucus_lane_Pann_DB	1	0.000320479	7	7	9	0.549296	16 kDa
SRR7978_TRINITY_DN19965_c1_g2::SRR7978_TRINITY_DN19965_c1_g2_i1::g.42057::m.42057 [type:complete len:580 gc:universal SRR7978_TRINITY_DN19965_c1_g2_i1:685-2424(+)]	type:complete len:580 gc:universal SRR7978_TRINITY_DN19965_c1_g2_i1:685-2424(+)	SRR7978_TRINITY_DN19965_c1_g2::SRR7978_TRINITY_DN19965_c1_g2_i1::g.42057::m.42057	IS_216438_Aes_Skin_Mucus_lane_Pann_DB	1	0.000605348	9	12	17	0.238342	68 kDa
SRR8021_TRINITY_DN20653_c0_g3::SRR8021_TRINITY_DN20653_c0_g3_i1::g.157859::m.157859 [type:complete len:195 gc:universal SRR8021_TRINITY_DN20653_c0_g3_i1:134-718(+)]	type:complete len:195 gc:universal SRR8021_TRINITY_DN20653_c0_g3_i1:134-718(+)	SRR8021_TRINITY_DN20653_c0_g3::SRR8021_TRINITY_DN20653_c0_g3_i1::g.157859::m.157859	IS_216438_Aes_Skin_Mucus_lane_Pann_DB	1	0.00103265	4	6	29	0.201031	22 kDa
SRR7978_TRINITY_DN18557_c0_g4::SRR7978_TRINITY_DN18557_c0_g4_i1::g.36911::m.36911 [type:complete len:284 gc:universal SRR7978_TRINITY_DN18557_c0_g4_i1:1061-1912(+)]	type:complete len:284 gc:universal SRR7978_TRINITY_DN18557_c0_g4_i1:1061-1912(+)	SRR7978_TRINITY_DN18557_c0_g4::SRR7978_TRINITY_DN18557_c0_g4_i1::g.36911::m.36911	IS_216438_Aes_Skin_Mucus_lane_Pann_DB	1	0.000356087	7	7	10	0.342756	30 kDa
SRR7978_TRINITY_DN41182_c0_g1::SRR7978_TRINITY_DN41182_c0_g1_i1::g.33675::m.33675 [type:complete len:419 gc:universal SRR7978_TRINITY_DN41182_c0_g1_i1:2005-749(-)]	type:complete len:419 gc:universal SRR7978_TRINITY_DN41182_c0_g1_i1:2005-749(-)	SRR7978_TRINITY_DN41182_c0_g1::SRR7978_TRINITY_DN41182_c0_g1_i1::g.33675::m.33675	IS_216438_Aes_Skin_Mucus_lane_Pann_DB	1	0.000391696	9	9	11	0.361244	47 kDa
SRR7980_TRINITY_DN14692_c0_g1::SRR7980_TRINITY_DN14692_c0_g1_i2::g.91222::m.91222 [type:complete len:127 gc:universal SRR7980_TRINITY_DN14692_c0_g1_i2:446-826(+)]	type:complete len:150 gc:universal SRR7979_TRINITY_DN13301_c0_g1_i2:232-681(+)	SRR7979_TRINITY_DN13301_c0_g1::SRR7979_TRINITY_DN13301_c0_g1_i2::g.65571::m.65571	IS_216438_Aes_Skin_Mucus_lane_Pann_DB	1	0.000391696	5	8	11	0.288591	17 kDa
SRR8017_TRINITY_DN23333_c0_g1::SRR8017_TRINITY_DN23333_c0_g1_i1::g.113333::m.113333 [type:complete len:410 gc:universal SRR8017_TRINITY_DN23333_c0_g1_i1:289-1518(+)]	type:complete len:410 gc:universal SRR8017_TRINITY_DN23333_c0_g1_i1:289-1518(+)	SRR8017_TRINITY_DN23333_c0_g1::SRR8017_TRINITY_DN23333_c0_g1_i1::g.113333::m.113333	IS_216438_Aes_Skin_Mucus_lane_Pann_DB	1	0.00085461	13	15	24	0.452323	45 kDa
SRR7914_TRINITY_DN29692_c1_g1::SRR7914_TRINITY_DN29692_c1_g1_i3::g.7493::m.7493 [type:complete len:374 gc:universal SRR7914_TRINITY_DN29692_c1_g1_i3:23-1144(+)]	type:complete len:374 gc:universal SRR7914_TRINITY_DN29692_c1_g1_i3:23-1144(+)	SRR7914_TRINITY_DN29692_c1_g1::SRR7914_TRINITY_DN29692_c1_g1_i3::g.7493::m.7493	IS_216438_Aes_Skin_Mucus_lane_Pann_DB	1	0.000178044	4	4	5	0.160858	42 kDa
SRR7980_TRINITY_DN18038_c3_g1::SRR7980_TRINITY_DN18038_c3_g1_i1::g.92707::m.92707 [type:complete len:634 gc:universal SRR7980_TRINITY_DN18038_c3_g1_i1:2782-881(-)]	type:complete len:634 gc:universal SRR7980_TRINITY_DN18038_c3_g1_i1:2782-881(-)	SRR7980_TRINITY_DN18038_c3_g1::SRR7980_TRINITY_DN18038_c3_g1_i1::g.92707::m.92707	IS_216438_Aes_Skin_Mucus_lane_Pann_DB	1	0.000498522	8	8	14	0.162717	71 kDa
SRR8017_TRINITY_DN26360_c0_g2::SRR8017_TRINITY_DN26360_c0_g2_i1::g.112689::m.112689 [type:complete len:389 gc:universal SRR8017_TRINITY_DN26360_c0_g2_i1:478-1644(+)]	type:complete len:389 gc:universal SRR8017_TRINITY_DN26360_c0_g2_i1:478-1644(+)	SRR8017_TRINITY_DN26360_c0_g2::SRR8017_TRINITY_DN26360_c0_g2_i1::g.112689::m.112689	IS_216438_Aes_Skin_Mucus_lane_Pann_DB	1	0.000356087	8	9	10	0.304124	43 kDa
SRR7978_TRINITY_DN17895_c1_g1::SRR7978_TRINITY_DN17895_c1_g1_i2::g.28121::m.28121 [type:complete len:184 gc:universal SRR7978_TRINITY_DN17895_c1_g1_i2:744-1295(+)]	type:complete len:170 gc:universal SRR1329_TRINITY_DN355519_c3_g3_i5:739-230(-)	SRR1329_TRINITY_DN355519_c3_g3::SRR1329_TRINITY_DN355519_c3_g3_i5::g.173276::m.173276	IS_216438_Aes_Skin_Mucus_lane_Pann_DB	1	0.000320479	4	5	9	0.343195	19 kDa
SRR1329_TRINITY_DN349975_c3_g1::SRR1329_TRINITY_DN349975_c3_g1_i9::g.192566::m.192566 [type:complete len:546 gc:universal SRR1329_TRINITY_DN349975_c3_g1_i9:1876-239(-)]	type:complete len:546 gc:universal SRR1329_TRINITY_DN349975_c3_g1_i9:1876-239(-)	SRR1329_TRINITY_DN349975_c3_g1::SRR1329_TRINITY_DN349975_c3_g1_i9::g.192566::m.192566	IS_216438_Aes_Skin_Mucus_lane_Pann_DB	1	0.000391696	7	7	11	0.26055	59 kDa
SRR7978_TRINITY_DN17997_c3_g1::SRR7978_TRINITY_DN17997_c3_g1_i3::g.36177::m.36177 [type:complete len:803 gc:universal SRR7978_TRINITY_DN17997_c3_g1_i3:389-2797(+)]	type:complete len:803 gc:universal SRR7978_TRINITY_DN17997_c3_g1_i3:389-2797(+)	SRR7978_TRINITY_DN17997_c3_g1::SRR7978_TRINITY_DN17997_c3_g1_i3::g.36177::m.36177	IS_216438_Aes_Skin_Mucus_lane_Pann_DB	1	0.000178044	4	4	5	0.0673317	93 kDa
SRR7980_TRINITY_DN19179_c1_g9::SRR7980_TRINITY_DN19179_c1_g9_i1::g.85177::m.85177 [type:complete len:548 gc:universal SRR7980_TRINITY_DN19179_c1_g9_i1:490-2133(+)]	type:complete len:548 gc:universal SRR7978_TRINITY_DN19812_c2_g1_i11:675-2318(+)	SRR7978_TRINITY_DN19812_c2_g1::SRR7978_TRINITY_DN19812_c2_g1_i11::g.36767::m.36767	IS_216438_Aes_Skin_Mucus_lane_Pann_DB	1	0.00056974	10	12	16	0.276051	60 kDa
SRR1329_TRINITY_DN349620_c0_g2::SRR1329_TRINITY_DN349620_c0_g2_i7::g.193068::m.193068 [type:5prime_partial len:295 gc:universal SRR1329_TRINITY_DN349620_c0_g2_i7:1079-195(-)]	type:complete len:450 gc:universal SRR7914_TRINITY_DN30425_c10_g3_i1:2174-825(-)	SRR7914_TRINITY_DN30425_c10_g3::SRR7914_TRINITY_DN30425_c10_g3_i1::g.22953::m.22953	IS_216438_Aes_Skin_Mucus_lane_Pann_DB	1	7.12175e-05	2	2	2	0.0668151	48 kDa
SRR7980_TRINITY_DN17914_c3_g2::SRR7980_TRINITY_DN17914_c3_g2_i1::g.83316::m.83316 [type:complete len:449 gc:universal SRR7980_TRINITY_DN17914_c3_g2_i1:2226-880(-)]	type:complete len:435 gc:universal SRR7978_TRINITY_DN13931_c0_g1_i1:794-2098(+)	SRR7978_TRINITY_DN13931_c0_g1::SRR7978_TRINITY_DN13931_c0_g1_i1::g.32622::m.32622	IS_216438_Aes_Skin_Mucus_lane_Pann_DB	1	0.00028487	3	3	8	0.175115	49 kDa
SRR7978_TRINITY_DN19089_c0_g1::SRR7978_TRINITY_DN19089_c0_g1_i2::g.25158::m.25158 [type:complete len:246 gc:universal SRR7978_TRINITY_DN19089_c0_g1_i2:590-1327(+)]	type:complete len:246 gc:universal SRR7978_TRINITY_DN19089_c0_g1_i2:590-1327(+)	SRR7978_TRINITY_DN19089_c0_g1::SRR7978_TRINITY_DN19089_c0_g1_i2::g.25158::m.25158	IS_216438_Aes_Skin_Mucus_lane_Pann_DB	1	0.000890218	4	6	25	0.273469	28 kDa
SRR7980_TRINITY_DN19278_c0_g1::SRR7980_TRINITY_DN19278_c0_g1_i5::g.76850::m.76850 [type:complete len:333 gc:universal SRR7980_TRINITY_DN19278_c0_g1_i5:1277-279(-)]	type:complete len:333 gc:universal SRR7980_TRINITY_DN19278_c0_g1_i5:1277-279(-)	SRR7980_TRINITY_DN19278_c0_g1::SRR7980_TRINITY_DN19278_c0_g1_i5::g.76850::m.76850	IS_216438_Aes_Skin_Mucus_lane_Pann_DB	1	0.000391696	1	1	11	0.213855	37 kDa
SRR7979_TRINITY_DN15096_c2_g1::SRR7979_TRINITY_DN15096_c2_g1_i4::g.61393::m.61393 [type:5prime_partial len:354 gc:universal SRR7979_TRINITY_DN15096_c2_g1_i4:3-1064(+)]	type:5prime_partial len:267 gc:universal SRR7979_TRINITY_DN15096_c2_g1_i2:2-802(+)	SRR7979_TRINITY_DN15096_c2_g1::SRR7979_TRINITY_DN15096_c2_g1_i2::g.61392::m.61392	IS_216438_Aes_Skin_Mucus_lane_Pann_DB	1	0.00028487	3	5	8	0.142857	30 kDa
SRR7914_TRINITY_DN28165_c0_g1::SRR7914_TRINITY_DN28165_c0_g1_i1::g.12062::m.12062 [type:complete len:153 gc:universal SRR7914_TRINITY_DN28165_c0_g1_i1:127-585(+)]	type:complete len:325 gc:universal SRR7980_TRINITY_DN18058_c6_g2_i3:2008-1034(-)	SRR7980_TRINITY_DN18058_c6_g2::SRR7980_TRINITY_DN18058_c6_g2_i3::g.92415::m.92415	IS_216438_Aes_Skin_Mucus_lane_Pann_DB	1	0.000213652	3	4	6	0.135802	36 kDa
SRR8017_TRINITY_DN22351_c0_g1::SRR8017_TRINITY_DN22351_c0_g1_i1::g.105504::m.105504 [type:complete len:217 gc:universal SRR8017_TRINITY_DN22351_c0_g1_i1:214-864(+)]	type:complete len:217 gc:universal SRR8017_TRINITY_DN22351_c0_g1_i1:214-864(+)	SRR8017_TRINITY_DN22351_c0_g1::SRR8017_TRINITY_DN22351_c0_g1_i1::g.105504::m.105504	IS_216438_Aes_Skin_Mucus_lane_Pann_DB	1	0.000106826	2	2	3	0.125	25 kDa
SRR7978_TRINITY_DN195_c0_g1::SRR7978_TRINITY_DN195_c0_g1_i1::g.31225::m.31225 [type:complete len:136 gc:universal SRR7978_TRINITY_DN195_c0_g1_i1:646-239(-)]	type:complete len:136 gc:universal SRR7978_TRINITY_DN195_c0_g1_i1:646-239(-)	SRR7978_TRINITY_DN195_c0_g1::SRR7978_TRINITY_DN195_c0_g1_i1::g.31225::m.31225	IS_216438_Aes_Skin_Mucus_lane_Pann_DB	1	0.000712175	6	8	20	0.614815	15 kDa
SRR8017_TRINITY_DN21182_c0_g1::SRR8017_TRINITY_DN21182_c0_g1_i1::g.111239::m.111239 [type:complete len:268 gc:universal SRR8017_TRINITY_DN21182_c0_g1_i1:1668-865(-)]	type:complete len:268 gc:universal SRR8017_TRINITY_DN21182_c0_g1_i1:1668-865(-)	SRR8017_TRINITY_DN21182_c0_g1::SRR8017_TRINITY_DN21182_c0_g1_i1::g.111239::m.111239	IS_216438_Aes_Skin_Mucus_lane_Pann_DB	1	0.000747783	12	15	21	0.513109	31 kDa
SRR8000_TRINITY_DN21371_c5_g3::SRR8000_TRINITY_DN21371_c5_g3_i2::g.94110::m.94110 [type:complete len:197 gc:universal SRR8000_TRINITY_DN21371_c5_g3_i2:1404-814(-)]	type:complete len:257 gc:universal SRR8000_TRINITY_DN21371_c5_g3_i4:1584-814(-)	SRR8000_TRINITY_DN21371_c5_g3::SRR8000_TRINITY_DN21371_c5_g3_i4::g.94113::m.94113	IS_216438_Aes_Skin_Mucus_lane_Pann_DB	1	0.00028487	4	4	8	0.332031	29 kDa
SRR1329_TRINITY_DN353280_c0_g1::SRR1329_TRINITY_DN353280_c0_g1_i7::g.186393::m.186393 [type:5prime_partial len:138 gc:universal SRR1329_TRINITY_DN353280_c0_g1_i7:588-175(-)]	type:complete len:200 gc:universal SRR8020_TRINITY_DN28851_c0_g1_i4:1220-621(-)	SRR8020_TRINITY_DN28851_c0_g1::SRR8020_TRINITY_DN28851_c0_g1_i4::g.128666::m.128666	IS_216438_Aes_Skin_Mucus_lane_Pann_DB	1	0.000356087	6	6	10	0.457286	23 kDa
SRR7979_TRINITY_DN18443_c2_g1::SRR7979_TRINITY_DN18443_c2_g1_i1::g.58777::m.58777 [type:complete len:280 gc:universal SRR7979_TRINITY_DN18443_c2_g1_i1:770-1609(+)]	type:3prime_partial len:211 gc:universal SRR1330_TRINITY_DN115378_c1_g1_i15:152-781(+)	SRR1330_TRINITY_DN115378_c1_g1::SRR1330_TRINITY_DN115378_c1_g1_i15::g.245821::m.245821	IS_216438_Aes_Skin_Mucus_lane_Pann_DB	1	0.00028487	4	4	8	0.290476	24 kDa
SRR7978_TRINITY_DN17764_c1_g4::SRR7978_TRINITY_DN17764_c1_g4_i1::g.39417::m.39417 [type:complete len:382 gc:universal SRR7978_TRINITY_DN17764_c1_g4_i1:7027-5882(-)]	type:5prime_partial len:376 gc:universal SRR1329_TRINITY_DN336048_c1_g1_i4:1-1128(+)	SRR1329_TRINITY_DN336048_c1_g1::SRR1329_TRINITY_DN336048_c1_g1_i4::g.195271::m.195271	IS_216438_Aes_Skin_Mucus_lane_Pann_DB	1	0.000178044	4	4	5	0.16	44 kDa
SRR8017_TRINITY_DN19851_c0_g1::SRR8017_TRINITY_DN19851_c0_g1_i1::g.114492::m.114492 [type:complete len:103 gc:universal SRR8017_TRINITY_DN19851_c0_g1_i1:609-301(-)]	type:5prime_partial len:127 gc:universal SRR1330_TRINITY_DN112856_c0_g1_i2:2-382(+)	SRR1330_TRINITY_DN112856_c0_g1::SRR1330_TRINITY_DN112856_c0_g1_i2::g.237836::m.237836	IS_216438_Aes_Skin_Mucus_lane_Pann_DB	1	0.000427305	5	8	12	0.547619	14 kDa
SRR8017_TRINITY_DN42343_c0_g1::SRR8017_TRINITY_DN42343_c0_g1_i1::g.119291::m.119291 [type:complete len:380 gc:universal SRR8017_TRINITY_DN42343_c0_g1_i1:139-1278(+)]	type:complete len:380 gc:universal SRR8017_TRINITY_DN42343_c0_g1_i1:139-1278(+)	SRR8017_TRINITY_DN42343_c0_g1::SRR8017_TRINITY_DN42343_c0_g1_i1::g.119291::m.119291	IS_216438_Aes_Skin_Mucus_lane_Pann_DB	1	0.000178044	5	5	5	0.176781	43 kDa
SRR7979_TRINITY_DN17748_c4_g5::SRR7979_TRINITY_DN17748_c4_g5_i1::g.62818::m.62818 [type:complete len:508 gc:universal SRR7979_TRINITY_DN17748_c4_g5_i1:299-1822(+)]	type:complete len:508 gc:universal SRR7979_TRINITY_DN17748_c4_g5_i1:299-1822(+)	SRR7979_TRINITY_DN17748_c4_g5::SRR7979_TRINITY_DN17748_c4_g5_i1::g.62818::m.62818	IS_216438_Aes_Skin_Mucus_lane_Pann_DB	1	0.000676566	9	12	19	0.368836	57 kDa
SRR8000_TRINITY_DN23260_c0_g1::SRR8000_TRINITY_DN23260_c0_g1_i1::g.101100::m.101100 [type:5prime_partial len:476 gc:universal SRR8000_TRINITY_DN23260_c0_g1_i1:2322-895(-)]	type:5prime_partial len:119 gc:universal SRR1330_TRINITY_DN124682_c0_g1_i2:1-357(+)	SRR1330_TRINITY_DN124682_c0_g1::SRR1330_TRINITY_DN124682_c0_g1_i2::g.242687::m.242687	IS_216438_Aes_Skin_Mucus_lane_Pann_DB	1	0.000676566	4	4	19	0.627119	13 kDa
SRR7980_TRINITY_DN19547_c2_g1::SRR7980_TRINITY_DN19547_c2_g1_i8::g.90484::m.90484 [type:complete len:416 gc:universal SRR7980_TRINITY_DN19547_c2_g1_i8:3625-4872(+)]	type:complete len:416 gc:universal SRR7978_TRINITY_DN16902_c0_g1_i1:443-1690(+)	SRR7978_TRINITY_DN16902_c0_g1::SRR7978_TRINITY_DN16902_c0_g1_i1::g.38934::m.38934	IS_216438_Aes_Skin_Mucus_lane_Pann_DB	1	7.12175e-05	2	2	2	0.0843373	47 kDa
SRR8017_TRINITY_DN25100_c8_g3::SRR8017_TRINITY_DN25100_c8_g3_i1::g.107960::m.107960 [type:complete len:286 gc:universal SRR8017_TRINITY_DN25100_c8_g3_i1:2969-2112(-)]	type:complete len:286 gc:universal SRR8017_TRINITY_DN25100_c8_g3_i1:2969-2112(-)	SRR8017_TRINITY_DN25100_c8_g3::SRR8017_TRINITY_DN25100_c8_g3_i1::g.107960::m.107960	IS_216438_Aes_Skin_Mucus_lane_Pann_DB	1	0.000249261	5	5	7	0.217544	33 kDa
SRR1330_TRINITY_DN181168_c0_g1::SRR1330_TRINITY_DN181168_c0_g1_i1::g.246036::m.246036 [type:5prime_partial len:127 gc:universal SRR1330_TRINITY_DN181168_c0_g1_i1:433-53(-)]	type:5prime_partial len:127 gc:universal SRR1330_TRINITY_DN181168_c0_g1_i1:433-53(-)	SRR1330_TRINITY_DN181168_c0_g1::SRR1330_TRINITY_DN181168_c0_g1_i1::g.246036::m.246036	IS_216438_Aes_Skin_Mucus_lane_Pann_DB	1	0.00056974	5	6	16	0.611111	14 kDa
SRR7978_TRINITY_DN18281_c0_g1::SRR7978_TRINITY_DN18281_c0_g1_i1::g.38316::m.38316 [type:internal len:515 gc:universal SRR7978_TRINITY_DN18281_c0_g1_i1:3-1544(+)]	type:internal len:459 gc:universal SRR1330_TRINITY_DN119136_c2_g1_i1:1376-3(-)	SRR1330_TRINITY_DN119136_c2_g1::SRR1330_TRINITY_DN119136_c2_g1_i1::g.245524::m.245524	IS_216438_Aes_Skin_Mucus_lane_Pann_DB	1	0.000819001	4	5	23	0.329694	52 kDa
SRR7914_TRINITY_DN32313_c7_g1::SRR7914_TRINITY_DN32313_c7_g1_i2::g.2705::m.2705 [type:complete len:378 gc:universal SRR7914_TRINITY_DN32313_c7_g1_i2:6633-5500(-)]	type:complete len:378 gc:universal SRR7914_TRINITY_DN32313_c7_g1_i2:6633-5500(-)	SRR7914_TRINITY_DN32313_c7_g1::SRR7914_TRINITY_DN32313_c7_g1_i2::g.2705::m.2705	IS_216438_Aes_Skin_Mucus_lane_Pann_DB	1	0.000462914	6	6	13	0.244032	39 kDa
SRR7980_TRINITY_DN17505_c0_g1::SRR7980_TRINITY_DN17505_c0_g1_i1::g.74822::m.74822 [type:complete len:275 gc:universal SRR7980_TRINITY_DN17505_c0_g1_i1:180-1004(+)]	type:complete len:275 gc:universal SRR7980_TRINITY_DN17505_c0_g1_i1:180-1004(+)	SRR7980_TRINITY_DN17505_c0_g1::SRR7980_TRINITY_DN17505_c0_g1_i1::g.74822::m.74822	IS_216438_Aes_Skin_Mucus_lane_Pann_DB	1	0.000320479	5	5	9	0.324817	30 kDa
SRR8000_TRINITY_DN15903_c0_g1::SRR8000_TRINITY_DN15903_c0_g1_i1::g.99967::m.99967 [type:complete len:406 gc:universal SRR8000_TRINITY_DN15903_c0_g1_i1:425-1642(+)]	type:complete len:406 gc:universal SRR8000_TRINITY_DN15903_c0_g1_i1:425-1642(+)	SRR8000_TRINITY_DN15903_c0_g1::SRR8000_TRINITY_DN15903_c0_g1_i1::g.99967::m.99967	IS_216438_Aes_Skin_Mucus_lane_Pann_DB	1	0.00056974	8	11	16	0.296296	45 kDa
SRR7980_TRINITY_DN14362_c0_g1::SRR7980_TRINITY_DN14362_c0_g1_i1::g.71294::m.71294 [type:complete len:275 gc:universal SRR7980_TRINITY_DN14362_c0_g1_i1:932-108(-)]	type:complete len:370 gc:universal SRR7980_TRINITY_DN14362_c0_g1_i2:1458-349(-)	SRR7980_TRINITY_DN14362_c0_g1::SRR7980_TRINITY_DN14362_c0_g1_i2::g.71295::m.71295	IS_216438_Aes_Skin_Mucus_lane_Pann_DB	1	0.000178044	3	3	5	0.143631	42 kDa
SRR8021_TRINITY_DN19108_c0_g1::SRR8021_TRINITY_DN19108_c0_g1_i1::g.158603::m.158603 [type:complete len:458 gc:universal SRR8021_TRINITY_DN19108_c0_g1_i1:1966-593(-)]	type:complete len:458 gc:universal SRR8021_TRINITY_DN19108_c0_g1_i1:1966-593(-)	SRR8021_TRINITY_DN19108_c0_g1::SRR8021_TRINITY_DN19108_c0_g1_i1::g.158603::m.158603	IS_216438_Aes_Skin_Mucus_lane_Pann_DB	1	0.000925827	2	2	26	0.181619	50 kDa
SRR7914_TRINITY_DN30630_c1_g2::SRR7914_TRINITY_DN30630_c1_g2_i1::g.11740::m.11740 [type:5prime_partial len:1249 gc:universal SRR7914_TRINITY_DN30630_c1_g2_i1:2-3748(+)]	type:5prime_partial len:1249 gc:universal SRR7914_TRINITY_DN30630_c1_g2_i1:2-3748(+)	SRR7914_TRINITY_DN30630_c1_g2::SRR7914_TRINITY_DN30630_c1_g2_i1::g.11740::m.11740	IS_216438_Aes_Skin_Mucus_lane_Pann_DB	1	0.00028487	4	4	8	0.0536859	146 kDa
SRR7980_TRINITY_DN19250_c4_g1::SRR7980_TRINITY_DN19250_c4_g1_i5::g.76889::m.76889 [type:3prime_partial len:618 gc:universal SRR7980_TRINITY_DN19250_c4_g1_i5:1853-3(-)]	type:3prime_partial len:385 gc:universal SRR1329_TRINITY_DN355115_c1_g1_i3:1152-1(-)	SRR1329_TRINITY_DN355115_c1_g1::SRR1329_TRINITY_DN355115_c1_g1_i3::g.190661::m.190661	IS_216438_Aes_Skin_Mucus_lane_Pann_DB	1	0.000391696	8	8	11	0.307292	43 kDa
SRR7980_TRINITY_DN15843_c0_g2::SRR7980_TRINITY_DN15843_c0_g2_i3::g.74084::m.74084 [type:complete len:628 gc:universal SRR7980_TRINITY_DN15843_c0_g2_i3:674-2557(+)]	type:complete len:628 gc:universal SRR7980_TRINITY_DN15843_c0_g2_i3:674-2557(+)	SRR7980_TRINITY_DN15843_c0_g2::SRR7980_TRINITY_DN15843_c0_g2_i3::g.74084::m.74084	IS_216438_Aes_Skin_Mucus_lane_Pann_DB	1	0.000391696	8	8	11	0.215311	70 kDa
SRR7980_TRINITY_DN18530_c10_g4::SRR7980_TRINITY_DN18530_c10_g4_i3::g.84306::m.84306 [type:complete len:206 gc:universal SRR7980_TRINITY_DN18530_c10_g4_i3:2441-1824(-)]	type:complete len:206 gc:universal SRR7980_TRINITY_DN18530_c10_g4_i3:2441-1824(-)	SRR7980_TRINITY_DN18530_c10_g4::SRR7980_TRINITY_DN18530_c10_g4_i3::g.84306::m.84306	IS_216438_Aes_Skin_Mucus_lane_Pann_DB	1	0.000320479	7	7	9	0.502439	23 kDa
SRR1330_TRINITY_DN114223_c0_g1::SRR1330_TRINITY_DN114223_c0_g1_i1::g.211996::m.211996 [type:complete len:691 gc:universal SRR1330_TRINITY_DN114223_c0_g1_i1:2213-141(-)]	type:complete len:691 gc:universal SRR1330_TRINITY_DN114223_c0_g1_i1:2213-141(-)	SRR1330_TRINITY_DN114223_c0_g1::SRR1330_TRINITY_DN114223_c0_g1_i1::g.211996::m.211996	IS_216438_Aes_Skin_Mucus_lane_Pann_DB	0.99	0.000106826	2	2	3	0.0318841	79 kDa
SRR7914_TRINITY_DN29597_c3_g1::SRR7914_TRINITY_DN29597_c3_g1_i3::g.15958::m.15958 [type:complete len:173 gc:universal SRR7914_TRINITY_DN29597_c3_g1_i3:362-880(+)]	type:complete len:173 gc:universal SRR7914_TRINITY_DN29597_c3_g1_i3:362-880(+)	SRR7914_TRINITY_DN29597_c3_g1::SRR7914_TRINITY_DN29597_c3_g1_i3::g.15958::m.15958	IS_216438_Aes_Skin_Mucus_lane_Pann_DB	1	0.000640957	8	15	18	0.622093	20 kDa
SRR7914_TRINITY_DN18259_c0_g1::SRR7914_TRINITY_DN18259_c0_g1_i1::g.17232::m.17232 [type:complete len:256 gc:universal SRR7914_TRINITY_DN18259_c0_g1_i1:558-1325(+)]	type:5prime_partial len:250 gc:universal SRR1329_TRINITY_DN350999_c5_g4_i1:2-751(+)	SRR1329_TRINITY_DN350999_c5_g4::SRR1329_TRINITY_DN350999_c5_g4_i1::g.180495::m.180495	IS_216438_Aes_Skin_Mucus_lane_Pann_DB	1	0.000320479	3	4	9	0.289157	28 kDa
SRR7979_TRINITY_DN13037_c0_g1::SRR7979_TRINITY_DN13037_c0_g1_i1::g.65186::m.65186 [type:complete len:379 gc:universal SRR7979_TRINITY_DN13037_c0_g1_i1:298-1434(+)]	type:internal len:223 gc:universal SRR1329_TRINITY_DN352351_c4_g3_i5:2-667(+)	SRR1329_TRINITY_DN352351_c4_g3::SRR1329_TRINITY_DN352351_c4_g3_i5::g.199632::m.199632	IS_216438_Aes_Skin_Mucus_lane_Pann_DB	1	0.000178044	2	3	5	0.193694	26 kDa
SRR7914_TRINITY_DN31468_c2_g2::SRR7914_TRINITY_DN31468_c2_g2_i2::g.8759::m.8759 [type:complete len:374 gc:universal SRR7914_TRINITY_DN31468_c2_g2_i2:706-1827(+)]	type:complete len:374 gc:universal SRR7914_TRINITY_DN31468_c2_g2_i2:706-1827(+)	SRR7914_TRINITY_DN31468_c2_g2::SRR7914_TRINITY_DN31468_c2_g2_i2::g.8759::m.8759	IS_216438_Aes_Skin_Mucus_lane_Pann_DB	1	0.000427305	6	7	12	0.230563	40 kDa
SRR8000_TRINITY_DN21728_c1_g1::SRR8000_TRINITY_DN21728_c1_g1_i1::g.94733::m.94733 [type:complete len:432 gc:universal SRR8000_TRINITY_DN21728_c1_g1_i1:2533-1238(-)]	type:complete len:432 gc:universal SRR8000_TRINITY_DN21728_c1_g1_i1:2533-1238(-)	SRR8000_TRINITY_DN21728_c1_g1::SRR8000_TRINITY_DN21728_c1_g1_i1::g.94733::m.94733	IS_216438_Aes_Skin_Mucus_lane_Pann_DB	1	0.000213652	5	5	6	0.132251	49 kDa
SRR8021_TRINITY_DN20341_c1_g2::SRR8021_TRINITY_DN20341_c1_g2_i15::g.159232::m.159232 [type:5prime_partial len:484 gc:universal SRR8021_TRINITY_DN20341_c1_g2_i15:3-1454(+)]	type:5prime_partial len:484 gc:universal SRR8021_TRINITY_DN20341_c1_g2_i15:3-1454(+)	SRR8021_TRINITY_DN20341_c1_g2::SRR8021_TRINITY_DN20341_c1_g2_i15::g.159232::m.159232	IS_216438_Aes_Skin_Mucus_lane_Pann_DB	1	0.000462914	7	9	13	0.188406	55 kDa
SRR7914_TRINITY_DN30261_c2_g1::SRR7914_TRINITY_DN30261_c2_g1_i1::g.14096::m.14096 [type:complete len:423 gc:universal SRR7914_TRINITY_DN30261_c2_g1_i1:94-1362(+)]	type:complete len:423 gc:universal SRR7914_TRINITY_DN30261_c2_g1_i1:94-1362(+)	SRR7914_TRINITY_DN30261_c2_g1::SRR7914_TRINITY_DN30261_c2_g1_i1::g.14096::m.14096	IS_216438_Aes_Skin_Mucus_lane_Pann_DB	1	0.000498522	6	8	14	0.234597	45 kDa
SRR1330_TRINITY_DN119750_c32_g2::SRR1330_TRINITY_DN119750_c32_g2_i2::g.227912::m.227912 [type:5prime_partial len:733 gc:universal SRR1330_TRINITY_DN119750_c32_g2_i2:2428-230(-)]	type:5prime_partial len:733 gc:universal SRR1330_TRINITY_DN119750_c32_g2_i2:2428-230(-)	SRR1330_TRINITY_DN119750_c32_g2::SRR1330_TRINITY_DN119750_c32_g2_i2::g.227912::m.227912	IS_216438_Aes_Skin_Mucus_lane_Pann_DB	1	0.000178044	3	4	5	0.0505464	86 kDa
SRR8017_TRINITY_DN24124_c0_g2::SRR8017_TRINITY_DN24124_c0_g2_i3::g.121280::m.121280 [type:5prime_partial len:491 gc:universal SRR8017_TRINITY_DN24124_c0_g2_i3:1-1473(+)]	type:5prime_partial len:491 gc:universal SRR8017_TRINITY_DN24124_c0_g2_i3:1-1473(+)	SRR8017_TRINITY_DN24124_c0_g2::SRR8017_TRINITY_DN24124_c0_g2_i3::g.121280::m.121280	IS_216438_Aes_Skin_Mucus_lane_Pann_DB	1	0.000605348	11	12	17	0.293878	55 kDa
SRR8017_TRINITY_DN26185_c5_g3::SRR8017_TRINITY_DN26185_c5_g3_i16::g.120759::m.120759 [type:complete len:329 gc:universal SRR8017_TRINITY_DN26185_c5_g3_i16:1948-2934(+)]	type:complete len:390 gc:universal SRR7978_TRINITY_DN20192_c1_g1_i7:1639-470(-)	SRR7978_TRINITY_DN20192_c1_g1::SRR7978_TRINITY_DN20192_c1_g1_i7::g.40128::m.40128	IS_216438_Aes_Skin_Mucus_lane_Pann_DB	1	0.000819001	3	3	23	0.452442	43 kDa
SRR7979_TRINITY_DN18043_c0_g1::SRR7979_TRINITY_DN18043_c0_g1_i2::g.68178::m.68178 [type:complete len:387 gc:universal SRR7979_TRINITY_DN18043_c0_g1_i2:253-1413(+)]	type:complete len:350 gc:universal SRR7978_TRINITY_DN5299_c0_g1_i1:1273-224(-)	SRR7978_TRINITY_DN5299_c0_g1::SRR7978_TRINITY_DN5299_c0_g1_i1::g.25945::m.25945	IS_216438_Aes_Skin_Mucus_lane_Pann_DB	1	0.000106826	2	2	3	0.0974212	39 kDa
SRR1330_TRINITY_DN123871_c0_g5::SRR1330_TRINITY_DN123871_c0_g5_i2::g.209378::m.209378 [type:complete len:377 gc:universal SRR1330_TRINITY_DN123871_c0_g5_i2:1904-774(-)]	type:internal len:160 gc:universal SRR1329_TRINITY_DN355687_c4_g1_i5:479-3(-)	SRR1329_TRINITY_DN355687_c4_g1::SRR1329_TRINITY_DN355687_c4_g1_i5::g.174881::m.174881	IS_216438_Aes_Skin_Mucus_lane_Pann_DB	1	0.00117509	2	5	33	0.603774	18 kDa
SRR7978_TRINITY_DN20099_c1_g1::SRR7978_TRINITY_DN20099_c1_g1_i15::g.31716::m.31716 [type:complete len:431 gc:universal SRR7978_TRINITY_DN20099_c1_g1_i15:433-1725(+)]	type:complete len:420 gc:universal SRR7914_TRINITY_DN32603_c0_g1_i3:216-1475(+)	SRR7914_TRINITY_DN32603_c0_g1::SRR7914_TRINITY_DN32603_c0_g1_i3::g.3301::m.3301	IS_216438_Aes_Skin_Mucus_lane_Pann_DB	1	0.000249261	5	5	7	0.171838	45 kDa
SRR8017_TRINITY_DN20722_c0_g1::SRR8017_TRINITY_DN20722_c0_g1_i1::g.109217::m.109217 [type:complete len:466 gc:universal SRR8017_TRINITY_DN20722_c0_g1_i1:235-1632(+)]	type:complete len:466 gc:universal SRR8017_TRINITY_DN20722_c0_g1_i1:235-1632(+)	SRR8017_TRINITY_DN20722_c0_g1::SRR8017_TRINITY_DN20722_c0_g1_i1::g.109217::m.109217	IS_216438_Aes_Skin_Mucus_lane_Pann_DB	1	0.000106826	2	2	3	0.0967742	52 kDa
SRR8017_TRINITY_DN3852_c0_g1::SRR8017_TRINITY_DN3852_c0_g1_i1::g.117486::m.117486 [type:complete len:336 gc:universal SRR8017_TRINITY_DN3852_c0_g1_i1:433-1440(+)]	type:complete len:336 gc:universal SRR8017_TRINITY_DN3852_c0_g1_i1:433-1440(+)	SRR8017_TRINITY_DN3852_c0_g1::SRR8017_TRINITY_DN3852_c0_g1_i1::g.117486::m.117486	IS_216438_Aes_Skin_Mucus_lane_Pann_DB	1	0.000391696	8	8	11	0.337313	37 kDa
SRR7980_TRINITY_DN8230_c0_g1::SRR7980_TRINITY_DN8230_c0_g1_i1::g.86805::m.86805 [type:complete len:202 gc:universal SRR7980_TRINITY_DN8230_c0_g1_i1:3538-2933(-)]	type:3prime_partial len:189 gc:universal SRR7914_TRINITY_DN30522_c0_g1_i1:566-3(-)	SRR7914_TRINITY_DN30522_c0_g1::SRR7914_TRINITY_DN30522_c0_g1_i1::g.19791::m.19791	IS_216438_Aes_Skin_Mucus_lane_Pann_DB	1	0.000320479	4	5	9	0.308511	21 kDa
SRR1330_TRINITY_DN224331_c0_g1::SRR1330_TRINITY_DN224331_c0_g1_i1::g.268553::m.268553 [type:internal len:221 gc:universal SRR1330_TRINITY_DN224331_c0_g1_i1:3-662(+)]	type:internal len:221 gc:universal SRR1330_TRINITY_DN224331_c0_g1_i1:3-662(+)	SRR1330_TRINITY_DN224331_c0_g1::SRR1330_TRINITY_DN224331_c0_g1_i1::g.268553::m.268553	IS_216438_Aes_Skin_Mucus_lane_Pann_DB	1	0.000178044	3	3	5	0.154545	25 kDa
SRR8017_TRINITY_DN22038_c0_g1::SRR8017_TRINITY_DN22038_c0_g1_i2::g.118879::m.118879 [type:complete len:285 gc:universal SRR8017_TRINITY_DN22038_c0_g1_i2:340-1194(+)]	type:complete len:249 gc:universal SRR7978_TRINITY_DN19761_c2_g1_i3:706-1452(+)	SRR7978_TRINITY_DN19761_c2_g1::SRR7978_TRINITY_DN19761_c2_g1_i3::g.27528::m.27528	IS_216438_Aes_Skin_Mucus_lane_Pann_DB	1	0.000712175	7	8	20	0.370968	29 kDa
SRR7978_TRINITY_DN195_c0_g1::SRR7978_TRINITY_DN195_c0_g1_i1::g.31225::m.31225 [type:complete len:136 gc:universal SRR7978_TRINITY_DN195_c0_g1_i1:646-239(-)]	type:5prime_partial len:169 gc:universal SRR7978_TRINITY_DN33629_c0_g1_i1:3-509(+)	SRR7978_TRINITY_DN33629_c0_g1::SRR7978_TRINITY_DN33629_c0_g1_i1::g.27982::m.27982	IS_216438_Aes_Skin_Mucus_lane_Pann_DB	1	0.000498522	6	9	14	0.375	19 kDa
SRR8000_TRINITY_DN23260_c0_g1::SRR8000_TRINITY_DN23260_c0_g1_i1::g.101100::m.101100 [type:5prime_partial len:476 gc:universal SRR8000_TRINITY_DN23260_c0_g1_i1:2322-895(-)]	type:complete len:394 gc:universal SRR1330_TRINITY_DN124682_c0_g1_i7:167-1348(+)	SRR1330_TRINITY_DN124682_c0_g1::SRR1330_TRINITY_DN124682_c0_g1_i7::g.242691::m.242691	IS_216438_Aes_Skin_Mucus_lane_Pann_DB	1	0.00195848	2	2	55	0.549618	45 kDa
SRR1330_TRINITY_DN196373_c0_g1::SRR1330_TRINITY_DN196373_c0_g1_i1::g.215951::m.215951 [type:internal len:215 gc:universal SRR1330_TRINITY_DN196373_c0_g1_i1:1-642(+)]	type:internal len:215 gc:universal SRR1330_TRINITY_DN196373_c0_g1_i1:1-642(+)	SRR1330_TRINITY_DN196373_c0_g1::SRR1330_TRINITY_DN196373_c0_g1_i1::g.215951::m.215951	IS_216438_Aes_Skin_Mucus_lane_Pann_DB	1	0.000142435	2	2	4	0.126168	23 kDa
SRR8020_TRINITY_DN30092_c0_g1::SRR8020_TRINITY_DN30092_c0_g1_i7::g.122208::m.122208 [type:complete len:131 gc:universal SRR8020_TRINITY_DN30092_c0_g1_i7:2629-3021(+)]	type:3prime_partial len:124 gc:universal SRR1329_TRINITY_DN352908_c0_g1_i1:371-3(-)	SRR1329_TRINITY_DN352908_c0_g1::SRR1329_TRINITY_DN352908_c0_g1_i1::g.187318::m.187318	IS_216438_Aes_Skin_Mucus_lane_Pann_DB	1	0.000498522	3	4	14	0.487805	13 kDa
SRR7914_TRINITY_DN28335_c0_g1::SRR7914_TRINITY_DN28335_c0_g1_i1::g.913::m.913 [type:complete len:419 gc:universal SRR7914_TRINITY_DN28335_c0_g1_i1:1230-2486(+)]	type:complete len:419 gc:universal SRR7914_TRINITY_DN28335_c0_g1_i1:1230-2486(+)	SRR7914_TRINITY_DN28335_c0_g1::SRR7914_TRINITY_DN28335_c0_g1_i1::g.913::m.913	IS_216438_Aes_Skin_Mucus_lane_Pann_DB	1	0.000249261	5	6	7	0.22488	46 kDa
SRR7979_TRINITY_DN19633_c1_g1::SRR7979_TRINITY_DN19633_c1_g1_i1::g.52531::m.52531 [type:complete len:200 gc:universal SRR7979_TRINITY_DN19633_c1_g1_i1:115-714(+)]	type:complete len:200 gc:universal SRR7979_TRINITY_DN19633_c1_g1_i1:115-714(+)	SRR7979_TRINITY_DN19633_c1_g1::SRR7979_TRINITY_DN19633_c1_g1_i1::g.52531::m.52531	IS_216438_Aes_Skin_Mucus_lane_Pann_DB	1	0.00028487	6	6	8	0.291457	22 kDa
SRR7979_TRINITY_DN15121_c0_g1::SRR7979_TRINITY_DN15121_c0_g1_i2::g.60443::m.60443 [type:complete len:129 gc:universal SRR7979_TRINITY_DN15121_c0_g1_i2:418-804(+)]	type:complete len:129 gc:universal SRR7979_TRINITY_DN15121_c0_g1_i2:418-804(+)	SRR7979_TRINITY_DN15121_c0_g1::SRR7979_TRINITY_DN15121_c0_g1_i2::g.60443::m.60443	IS_216438_Aes_Skin_Mucus_lane_Pann_DB	1	0.000249261	4	5	7	0.414062	15 kDa
SRR1329_TRINITY_DN315700_c0_g1::SRR1329_TRINITY_DN315700_c0_g1_i1::g.183696::m.183696 [type:complete len:216 gc:universal SRR1329_TRINITY_DN315700_c0_g1_i1:236-883(+)]	type:complete len:216 gc:universal SRR1329_TRINITY_DN315700_c0_g1_i1:236-883(+)	SRR1329_TRINITY_DN315700_c0_g1::SRR1329_TRINITY_DN315700_c0_g1_i1::g.183696::m.183696	IS_216438_Aes_Skin_Mucus_lane_Pann_DB	1	0.000213652	4	5	6	0.306977	24 kDa
SRR7980_TRINITY_DN19452_c3_g8::SRR7980_TRINITY_DN19452_c3_g8_i1::g.93458::m.93458 [type:complete len:301 gc:universal SRR7980_TRINITY_DN19452_c3_g8_i1:1262-360(-)]	type:complete len:301 gc:universal SRR7980_TRINITY_DN19452_c3_g8_i1:1262-360(-)	SRR7980_TRINITY_DN19452_c3_g8::SRR7980_TRINITY_DN19452_c3_g8_i1::g.93458::m.93458	IS_216438_Aes_Skin_Mucus_lane_Pann_DB	1	0.00028487	6	6	8	0.386667	35 kDa
SRR7979_TRINITY_DN17128_c4_g3::SRR7979_TRINITY_DN17128_c4_g3_i11::g.50039::m.50039 [type:complete len:629 gc:universal SRR7979_TRINITY_DN17128_c4_g3_i11:468-2354(+)]	type:complete len:629 gc:universal SRR7979_TRINITY_DN17128_c4_g3_i11:468-2354(+)	SRR7979_TRINITY_DN17128_c4_g3::SRR7979_TRINITY_DN17128_c4_g3_i11::g.50039::m.50039	IS_216438_Aes_Skin_Mucus_lane_Pann_DB	1	0.000213652	2	2	6	0.105096	70 kDa
SRR7979_TRINITY_DN15705_c0_g1::SRR7979_TRINITY_DN15705_c0_g1_i1::g.58265::m.58265 [type:complete len:684 gc:universal SRR7979_TRINITY_DN15705_c0_g1_i1:679-2730(+)]	type:complete len:684 gc:universal SRR7979_TRINITY_DN15705_c0_g1_i1:679-2730(+)	SRR7979_TRINITY_DN15705_c0_g1::SRR7979_TRINITY_DN15705_c0_g1_i1::g.58265::m.58265	IS_216438_Aes_Skin_Mucus_lane_Pann_DB	1	0.000106826	2	2	3	0.0322108	75 kDa
SRR7978_TRINITY_DN19499_c3_g1::SRR7978_TRINITY_DN19499_c3_g1_i1::g.44861::m.44861 [type:complete len:106 gc:universal SRR7978_TRINITY_DN19499_c3_g1_i1:177-494(+)]	type:complete len:106 gc:universal SRR7978_TRINITY_DN19499_c3_g1_i1:177-494(+)	SRR7978_TRINITY_DN19499_c3_g1::SRR7978_TRINITY_DN19499_c3_g1_i1::g.44861::m.44861	IS_216438_Aes_Skin_Mucus_lane_Pann_DB	1	0.000462914	2	3	13	0.619048	12 kDa
SRR7914_TRINITY_DN30749_c2_g6::SRR7914_TRINITY_DN30749_c2_g6_i2::g.4834::m.4834 [type:complete len:521 gc:universal SRR7914_TRINITY_DN30749_c2_g6_i2:1886-324(-)]	type:5prime_partial len:505 gc:universal SRR7980_TRINITY_DN17791_c2_g2_i1:3-1517(+)	SRR7980_TRINITY_DN17791_c2_g2::SRR7980_TRINITY_DN17791_c2_g2_i1::g.87179::m.87179	IS_216438_Aes_Skin_Mucus_lane_Pann_DB	1	0.000712175	3	3	20	0.311508	56 kDa
SRR8000_TRINITY_DN21975_c5_g3::SRR8000_TRINITY_DN21975_c5_g3_i1::g.98680::m.98680 [type:complete len:313 gc:universal SRR8000_TRINITY_DN21975_c5_g3_i1:419-1357(+)]	type:complete len:313 gc:universal SRR8000_TRINITY_DN21975_c5_g3_i1:419-1357(+)	SRR8000_TRINITY_DN21975_c5_g3::SRR8000_TRINITY_DN21975_c5_g3_i1::g.98680::m.98680	IS_216438_Aes_Skin_Mucus_lane_Pann_DB	1	0.000106826	2	2	3	0.0961538	35 kDa
SRR1329_TRINITY_DN353594_c1_g1::SRR1329_TRINITY_DN353594_c1_g1_i13::g.182100::m.182100 [type:3prime_partial len:274 gc:universal SRR1329_TRINITY_DN353594_c1_g1_i13:102-920(+)]	type:complete len:441 gc:universal SRR7980_TRINITY_DN18796_c3_g3_i4:261-1583(+)	SRR7980_TRINITY_DN18796_c3_g3::SRR7980_TRINITY_DN18796_c3_g3_i4::g.79448::m.79448	IS_216438_Aes_Skin_Mucus_lane_Pann_DB	0.99	0.000106826	0	0	3	0.0886364	49 kDa
SRR7978_TRINITY_DN19227_c1_g1::SRR7978_TRINITY_DN19227_c1_g1_i1::g.30384::m.30384 [type:complete len:194 gc:universal SRR7978_TRINITY_DN19227_c1_g1_i1:97-678(+)]	type:5prime_partial len:171 gc:universal SRR8017_TRINITY_DN24599_c0_g1_i1:708-196(-)	SRR8017_TRINITY_DN24599_c0_g1::SRR8017_TRINITY_DN24599_c0_g1_i1::g.114873::m.114873	IS_216438_Aes_Skin_Mucus_lane_Pann_DB	1	0.00085461	2	3	24	0.188235	18 kDa
SRR7979_TRINITY_DN16544_c0_g1::SRR7979_TRINITY_DN16544_c0_g1_i2::g.63753::m.63753 [type:complete len:453 gc:universal SRR7979_TRINITY_DN16544_c0_g1_i2:314-1672(+)]	type:3prime_partial len:457 gc:universal SRR1330_TRINITY_DN121337_c0_g1_i1:128-1495(+)	SRR1330_TRINITY_DN121337_c0_g1::SRR1330_TRINITY_DN121337_c0_g1_i1::g.253499::m.253499	IS_216438_Aes_Skin_Mucus_lane_Pann_DB	1	0.000213652	4	4	6	0.114035	54 kDa
SRR7914_TRINITY_DN28318_c0_g1::SRR7914_TRINITY_DN28318_c0_g1_i1::g.954::m.954 [type:complete len:1060 gc:universal SRR7914_TRINITY_DN28318_c0_g1_i1:5592-2413(-)]	type:complete len:1060 gc:universal SRR7914_TRINITY_DN28318_c0_g1_i1:5592-2413(-)	SRR7914_TRINITY_DN28318_c0_g1::SRR7914_TRINITY_DN28318_c0_g1_i1::g.954::m.954	IS_216438_Aes_Skin_Mucus_lane_Pann_DB	1	0.000213652	4	4	6	0.068933	119 kDa
SRR1330_TRINITY_DN86387_c0_g1::SRR1330_TRINITY_DN86387_c0_g1_i1::g.264990::m.264990 [type:internal len:110 gc:universal SRR1330_TRINITY_DN86387_c0_g1_i1:2-328(+)]	type:5prime_partial len:128 gc:universal SRR1330_TRINITY_DN86387_c0_g1_i2:2-385(+)	SRR1330_TRINITY_DN86387_c0_g1::SRR1330_TRINITY_DN86387_c0_g1_i2::g.264991::m.264991	IS_216438_Aes_Skin_Mucus_lane_Pann_DB	1	0.000249261	4	5	7	0.401575	15 kDa
SRR7978_TRINITY_DN19338_c0_g1::SRR7978_TRINITY_DN19338_c0_g1_i1::g.40808::m.40808 [type:complete len:276 gc:universal SRR7978_TRINITY_DN19338_c0_g1_i1:259-1086(+)]	type:complete len:276 gc:universal SRR7978_TRINITY_DN19338_c0_g1_i1:259-1086(+)	SRR7978_TRINITY_DN19338_c0_g1::SRR7978_TRINITY_DN19338_c0_g1_i1::g.40808::m.40808	IS_216438_Aes_Skin_Mucus_lane_Pann_DB	1	0.000106826	3	3	3	0.203636	30 kDa
SRR1330_TRINITY_DN79920_c0_g1::SRR1330_TRINITY_DN79920_c0_g1_i1::g.264522::m.264522 [type:internal len:138 gc:universal SRR1330_TRINITY_DN79920_c0_g1_i1:411-1(-)]	type:internal len:138 gc:universal SRR1330_TRINITY_DN79920_c0_g1_i1:411-1(-)	SRR1330_TRINITY_DN79920_c0_g1::SRR1330_TRINITY_DN79920_c0_g1_i1::g.264522::m.264522	IS_216438_Aes_Skin_Mucus_lane_Pann_DB	1	0.000106826	2	2	3	0.20438	16 kDa
SRR8017_TRINITY_DN25662_c1_g12::SRR8017_TRINITY_DN25662_c1_g12_i2::g.107589::m.107589 [type:3prime_partial len:314 gc:universal SRR8017_TRINITY_DN25662_c1_g12_i2:182-1120(+)]	type:3prime_partial len:314 gc:universal SRR8017_TRINITY_DN25662_c1_g12_i2:182-1120(+)	SRR8017_TRINITY_DN25662_c1_g12::SRR8017_TRINITY_DN25662_c1_g12_i2::g.107589::m.107589	IS_216438_Aes_Skin_Mucus_lane_Pann_DB	1	0.000106826	3	3	3	0.15655	35 kDa
SRR8017_TRINITY_DN24682_c3_g1::SRR8017_TRINITY_DN24682_c3_g1_i1::g.102534::m.102534 [type:complete len:508 gc:universal SRR8017_TRINITY_DN24682_c3_g1_i1:438-1961(+)]	type:complete len:508 gc:universal SRR8017_TRINITY_DN24682_c3_g1_i1:438-1961(+)	SRR8017_TRINITY_DN24682_c3_g1::SRR8017_TRINITY_DN24682_c3_g1_i1::g.102534::m.102534	IS_216438_Aes_Skin_Mucus_lane_Pann_DB	1	0.000498522	9	10	14	0.341223	55 kDa
sp|CAS1_BOVIN| [sp|CAS1_BOVIN|]	sp|CAS1_BOVIN|	sp|CAS1_BOVIN|	IS_216438_Aes_Skin_Mucus_lane_Pann_DB	1	0.000178044	4	4	5	0.294393	25 kDa
SRR7979_TRINITY_DN18918_c1_g1::SRR7979_TRINITY_DN18918_c1_g1_i1::g.56855::m.56855 [type:complete len:202 gc:universal SRR7979_TRINITY_DN18918_c1_g1_i1:1163-558(-)]	type:complete len:202 gc:universal SRR7979_TRINITY_DN18918_c1_g1_i1:1163-558(-)	SRR7979_TRINITY_DN18918_c1_g1::SRR7979_TRINITY_DN18918_c1_g1_i1::g.56855::m.56855	IS_216438_Aes_Skin_Mucus_lane_Pann_DB	1	0.000249261	4	5	7	0.169154	22 kDa
SRR8000_TRINITY_DN20259_c0_g2::SRR8000_TRINITY_DN20259_c0_g2_i3::g.93957::m.93957 [type:complete len:105 gc:universal SRR8000_TRINITY_DN20259_c0_g2_i3:125-439(+)]	type:complete len:105 gc:universal SRR8017_TRINITY_DN23569_c0_g3_i1:658-344(-)	SRR8017_TRINITY_DN23569_c0_g3::SRR8017_TRINITY_DN23569_c0_g3_i1::g.116298::m.116298	IS_216438_Aes_Skin_Mucus_lane_Pann_DB	1	0.000213652	4	4	6	0.490385	11 kDa
SRR1329_TRINITY_DN347645_c1_g1::SRR1329_TRINITY_DN347645_c1_g1_i8::g.189012::m.189012 [type:complete len:536 gc:universal SRR1329_TRINITY_DN347645_c1_g1_i8:72-1679(+)]	type:complete len:536 gc:universal SRR1329_TRINITY_DN347645_c1_g1_i8:72-1679(+)	SRR1329_TRINITY_DN347645_c1_g1::SRR1329_TRINITY_DN347645_c1_g1_i8::g.189012::m.189012	IS_216438_Aes_Skin_Mucus_lane_Pann_DB	1	0.00028487	6	6	8	0.162617	58 kDa
SRR8000_TRINITY_DN21077_c0_g2::SRR8000_TRINITY_DN21077_c0_g2_i2::g.96097::m.96097 [type:5prime_partial len:3011 gc:universal SRR8000_TRINITY_DN21077_c0_g2_i2:3-9035(+)]	type:5prime_partial len:3011 gc:universal SRR8000_TRINITY_DN21077_c0_g2_i2:3-9035(+)	SRR8000_TRINITY_DN21077_c0_g2::SRR8000_TRINITY_DN21077_c0_g2_i2::g.96097::m.96097	IS_216438_Aes_Skin_Mucus_lane_Pann_DB	1	0.000178044	4	4	5	0.0292359	332 kDa
SRR7980_TRINITY_DN18873_c2_g2::SRR7980_TRINITY_DN18873_c2_g2_i5::g.80961::m.80961 [type:complete len:250 gc:universal SRR7980_TRINITY_DN18873_c2_g2_i5:1109-1858(+)]	type:complete len:250 gc:universal SRR7980_TRINITY_DN18873_c2_g2_i5:1109-1858(+)	SRR7980_TRINITY_DN18873_c2_g2::SRR7980_TRINITY_DN18873_c2_g2_i5::g.80961::m.80961	IS_216438_Aes_Skin_Mucus_lane_Pann_DB	1	0.000213652	4	4	6	0.26506	28 kDa
SRR7980_TRINITY_DN103_c0_g1::SRR7980_TRINITY_DN103_c0_g1_i1::g.77622::m.77622 [type:complete len:273 gc:universal SRR7980_TRINITY_DN103_c0_g1_i1:307-1125(+)]	type:complete len:266 gc:universal SRR7979_TRINITY_DN15919_c0_g1_i1:904-107(-)	SRR7979_TRINITY_DN15919_c0_g1::SRR7979_TRINITY_DN15919_c0_g1_i1::g.65498::m.65498	IS_216438_Aes_Skin_Mucus_lane_Pann_DB	1	0.000213652	3	4	6	0.181132	30 kDa
SRR7979_TRINITY_DN16686_c0_g1::SRR7979_TRINITY_DN16686_c0_g1_i2::g.46219::m.46219 [type:complete len:460 gc:universal SRR7979_TRINITY_DN16686_c0_g1_i2:226-1605(+)]	type:complete len:460 gc:universal SRR7979_TRINITY_DN16686_c0_g1_i2:226-1605(+)	SRR7979_TRINITY_DN16686_c0_g1::SRR7979_TRINITY_DN16686_c0_g1_i2::g.46219::m.46219	IS_216438_Aes_Skin_Mucus_lane_Pann_DB	1	0.00028487	5	6	8	0.115468	52 kDa
SRR8000_TRINITY_DN18889_c0_g1::SRR8000_TRINITY_DN18889_c0_g1_i1::g.97895::m.97895 [type:complete len:284 gc:universal SRR8000_TRINITY_DN18889_c0_g1_i1:1800-949(-)]	type:complete len:284 gc:universal SRR8000_TRINITY_DN18889_c0_g1_i1:1800-949(-)	SRR8000_TRINITY_DN18889_c0_g1::SRR8000_TRINITY_DN18889_c0_g1_i1::g.97895::m.97895	IS_216438_Aes_Skin_Mucus_lane_Pann_DB	1	0.000320479	6	7	9	0.310954	31 kDa
SRR7978_TRINITY_DN18758_c2_g3::SRR7978_TRINITY_DN18758_c2_g3_i2::g.32965::m.32965 [type:complete len:852 gc:universal SRR7978_TRINITY_DN18758_c2_g3_i2:3018-463(-)]	type:complete len:852 gc:universal SRR7978_TRINITY_DN18758_c2_g3_i2:3018-463(-)	SRR7978_TRINITY_DN18758_c2_g3::SRR7978_TRINITY_DN18758_c2_g3_i2::g.32965::m.32965	IS_216438_Aes_Skin_Mucus_lane_Pann_DB	1	0.000605348	8	9	17	0.19624	98 kDa
SRR7980_TRINITY_DN17956_c7_g4::SRR7980_TRINITY_DN17956_c7_g4_i2::g.83166::m.83166 [type:complete len:251 gc:universal SRR7980_TRINITY_DN17956_c7_g4_i2:1766-1014(-)]	type:5prime_partial len:402 gc:universal SRR8017_TRINITY_DN26165_c3_g1_i16:3-1208(+)	SRR8017_TRINITY_DN26165_c3_g1::SRR8017_TRINITY_DN26165_c3_g1_i16::g.121079::m.121079	IS_216438_Aes_Skin_Mucus_lane_Pann_DB	1	0.00188726	4	6	53	0.461347	45 kDa
SRR7914_TRINITY_DN28505_c2_g2::SRR7914_TRINITY_DN28505_c2_g2_i2::g.17553::m.17553 [type:complete len:746 gc:universal SRR7914_TRINITY_DN28505_c2_g2_i2:194-2431(+)]	type:complete len:746 gc:universal SRR7914_TRINITY_DN28505_c2_g2_i2:194-2431(+)	SRR7914_TRINITY_DN28505_c2_g2::SRR7914_TRINITY_DN28505_c2_g2_i2::g.17553::m.17553	IS_216438_Aes_Skin_Mucus_lane_Pann_DB	1	0.000462914	10	10	13	0.220134	83 kDa
SRR7978_TRINITY_DN39042_c0_g1::SRR7978_TRINITY_DN39042_c0_g1_i1::g.39245::m.39245 [type:internal len:116 gc:universal SRR7978_TRINITY_DN39042_c0_g1_i1:1-345(+)]	type:internal len:140 gc:universal SRR8017_TRINITY_DN36970_c0_g1_i1:3-419(+)	SRR8017_TRINITY_DN36970_c0_g1::SRR8017_TRINITY_DN36970_c0_g1_i1::g.116481::m.116481	IS_216438_Aes_Skin_Mucus_lane_Pann_DB	1	0.00291992	1	1	82	0.402878	14 kDa
SRR1330_TRINITY_DN123871_c0_g5::SRR1330_TRINITY_DN123871_c0_g5_i2::g.209378::m.209378 [type:complete len:377 gc:universal SRR1330_TRINITY_DN123871_c0_g5_i2:1904-774(-)]	type:complete len:378 gc:universal SRR7914_TRINITY_DN32483_c1_g1_i4:62-1195(+)	SRR7914_TRINITY_DN32483_c1_g1::SRR7914_TRINITY_DN32483_c1_g1_i4::g.4238::m.4238	IS_216438_Aes_Skin_Mucus_lane_Pann_DB	1	0.00811879	2	6	228	0.668435	42 kDa
SRR7978_TRINITY_DN19342_c1_g2::SRR7978_TRINITY_DN19342_c1_g2_i2::g.40817::m.40817 [type:complete len:260 gc:universal SRR7978_TRINITY_DN19342_c1_g2_i2:212-991(+)]	type:complete len:260 gc:universal SRR7978_TRINITY_DN19342_c1_g2_i2:212-991(+)	SRR7978_TRINITY_DN19342_c1_g2::SRR7978_TRINITY_DN19342_c1_g2_i2::g.40817::m.40817	IS_216438_Aes_Skin_Mucus_lane_Pann_DB	1	7.12175e-05	2	2	2	0.0926641	29 kDa
SRR8017_TRINITY_DN26467_c1_g2::SRR8017_TRINITY_DN26467_c1_g2_i2::g.104747::m.104747 [type:5prime_partial len:164 gc:universal SRR8017_TRINITY_DN26467_c1_g2_i2:3-494(+)]	type:complete len:124 gc:universal SRR8000_TRINITY_DN22304_c3_g2_i2:946-1317(+)	SRR8000_TRINITY_DN22304_c3_g2::SRR8000_TRINITY_DN22304_c3_g2_i2::g.95904::m.95904	IS_216438_Aes_Skin_Mucus_lane_Pann_DB	1	7.12175e-05	2	2	2	0.170732	13 kDa
SRR7978_TRINITY_DN16392_c0_g4::SRR7978_TRINITY_DN16392_c0_g4_i1::g.26060::m.26060 [type:complete len:252 gc:universal SRR7978_TRINITY_DN16392_c0_g4_i1:730-1485(+)]	type:complete len:252 gc:universal SRR7978_TRINITY_DN16392_c0_g4_i1:730-1485(+)	SRR7978_TRINITY_DN16392_c0_g4::SRR7978_TRINITY_DN16392_c0_g4_i1::g.26060::m.26060	IS_216438_Aes_Skin_Mucus_lane_Pann_DB	1	0.000142435	3	3	4	0.171315	28 kDa
SRR7914_TRINITY_DN29684_c4_g3::SRR7914_TRINITY_DN29684_c4_g3_i5::g.7420::m.7420 [type:complete len:455 gc:universal SRR7914_TRINITY_DN29684_c4_g3_i5:68-1432(+)]	type:5prime_partial len:459 gc:universal SRR1330_TRINITY_DN121955_c3_g3_i1:3-1379(+)	SRR1330_TRINITY_DN121955_c3_g3::SRR1330_TRINITY_DN121955_c3_g3_i1::g.246927::m.246927	IS_216438_Aes_Skin_Mucus_lane_Pann_DB	1	0.000213652	4	5	6	0.152838	49 kDa
SRR7914_TRINITY_DN21510_c0_g2::SRR7914_TRINITY_DN21510_c0_g2_i1::g.14686::m.14686 [type:complete len:875 gc:universal SRR7914_TRINITY_DN21510_c0_g2_i1:99-2723(+)]	type:complete len:875 gc:universal SRR7914_TRINITY_DN21510_c0_g2_i1:99-2723(+)	SRR7914_TRINITY_DN21510_c0_g2::SRR7914_TRINITY_DN21510_c0_g2_i1::g.14686::m.14686	IS_216438_Aes_Skin_Mucus_lane_Pann_DB	1	0.000106826	3	3	3	0.0514874	96 kDa
SRR8017_TRINITY_DN24800_c0_g3::SRR8017_TRINITY_DN24800_c0_g3_i1::g.105951::m.105951 [type:complete len:860 gc:universal SRR8017_TRINITY_DN24800_c0_g3_i1:225-2804(+)]	type:complete len:858 gc:universal SRR7978_TRINITY_DN18958_c0_g2_i1:3313-740(-)	SRR7978_TRINITY_DN18958_c0_g2::SRR7978_TRINITY_DN18958_c0_g2_i1::g.34019::m.34019	IS_216438_Aes_Skin_Mucus_lane_Pann_DB	1	0.00028487	4	4	8	0.092182	95 kDa
SRR7979_TRINITY_DN18580_c2_g1::SRR7979_TRINITY_DN18580_c2_g1_i14::g.60204::m.60204 [type:complete len:235 gc:universal SRR7979_TRINITY_DN18580_c2_g1_i14:311-1015(+)]	type:3prime_partial len:234 gc:universal SRR1329_TRINITY_DN341237_c0_g1_i2:83-781(+)	SRR1329_TRINITY_DN341237_c0_g1::SRR1329_TRINITY_DN341237_c0_g1_i2::g.173589::m.173589	IS_216438_Aes_Skin_Mucus_lane_Pann_DB	1	0.00028487	4	5	8	0.27897	26 kDa
SRR8017_TRINITY_DN24281_c0_g2::SRR8017_TRINITY_DN24281_c0_g2_i1::g.106323::m.106323 [type:complete len:183 gc:universal SRR8017_TRINITY_DN24281_c0_g2_i1:97-645(+)]	type:5prime_partial len:190 gc:universal SRR8021_TRINITY_DN20472_c4_g2_i10:960-391(-)	SRR8021_TRINITY_DN20472_c4_g2::SRR8021_TRINITY_DN20472_c4_g2_i10::g.152052::m.152052	IS_216438_Aes_Skin_Mucus_lane_Pann_DB	1	0.00028487	5	6	8	0.518518	21 kDa
SRR7979_TRINITY_DN15252_c0_g1::SRR7979_TRINITY_DN15252_c0_g1_i6::g.46351::m.46351 [type:3prime_partial len:609 gc:universal SRR7979_TRINITY_DN15252_c0_g1_i6:240-2063(+)]	type:complete len:787 gc:universal SRR7980_TRINITY_DN18442_c3_g2_i27:2967-607(-)	SRR7980_TRINITY_DN18442_c3_g2::SRR7980_TRINITY_DN18442_c3_g2_i27::g.82158::m.82158	IS_216438_Aes_Skin_Mucus_lane_Pann_DB	1	0.000178044	2	3	5	0.0343511	79 kDa
SRR7979_TRINITY_DN13853_c0_g1::SRR7979_TRINITY_DN13853_c0_g1_i4::g.49526::m.49526 [type:complete len:244 gc:universal SRR7979_TRINITY_DN13853_c0_g1_i4:804-73(-)]	type:complete len:244 gc:universal SRR7979_TRINITY_DN13853_c0_g1_i4:804-73(-)	SRR7979_TRINITY_DN13853_c0_g1::SRR7979_TRINITY_DN13853_c0_g1_i4::g.49526::m.49526	IS_216438_Aes_Skin_Mucus_lane_Pann_DB	1	0.000356087	4	5	10	0.300412	27 kDa
sp|K1C15_SHEEP| [sp|K1C15_SHEEP|]	sp|K1C15_SHEEP|	sp|K1C15_SHEEP|	IS_216438_Aes_Skin_Mucus_lane_Pann_DB	1	0.000961436	2	2	27	0.163355	49 kDa
SRR8017_TRINITY_DN26941_c1_g1::SRR8017_TRINITY_DN26941_c1_g1_i4::g.110048::m.110048 [type:complete len:465 gc:universal SRR8017_TRINITY_DN26941_c1_g1_i4:1740-346(-)]	type:complete len:465 gc:universal SRR8017_TRINITY_DN26941_c1_g1_i5:1739-345(-)	SRR8017_TRINITY_DN26941_c1_g1::SRR8017_TRINITY_DN26941_c1_g1_i5::g.110049::m.110049	IS_216438_Aes_Skin_Mucus_lane_Pann_DB	1	0.00128191	3	4	36	0.398707	54 kDa
SRR7979_TRINITY_DN12748_c0_g1::SRR7979_TRINITY_DN12748_c0_g1_i1::g.63450::m.63450 [type:complete len:294 gc:universal SRR7979_TRINITY_DN12748_c0_g1_i1:447-1328(+)]	type:3prime_partial len:232 gc:universal SRR1329_TRINITY_DN351935_c0_g1_i11:695-3(-)	SRR1329_TRINITY_DN351935_c0_g1::SRR1329_TRINITY_DN351935_c0_g1_i11::g.189287::m.189287	IS_216438_Aes_Skin_Mucus_lane_Pann_DB	1	0.000213652	4	4	6	0.251082	26 kDa
SRR7914_TRINITY_DN28293_c0_g2::SRR7914_TRINITY_DN28293_c0_g2_i2::g.17662::m.17662 [type:complete len:256 gc:universal SRR7914_TRINITY_DN28293_c0_g2_i2:204-971(+)]	type:complete len:219 gc:universal SRR7914_TRINITY_DN28293_c0_g2_i1:204-860(+)	SRR7914_TRINITY_DN28293_c0_g2::SRR7914_TRINITY_DN28293_c0_g2_i1::g.17660::m.17660	IS_216438_Aes_Skin_Mucus_lane_Pann_DB	1	0.000106826	2	2	3	0.110092	25 kDa
SRR7978_TRINITY_DN14366_c0_g1::SRR7978_TRINITY_DN14366_c0_g1_i3::g.26460::m.26460 [type:complete len:179 gc:universal SRR7978_TRINITY_DN14366_c0_g1_i3:446-982(+)]	type:complete len:179 gc:universal SRR7978_TRINITY_DN14366_c0_g1_i3:446-982(+)	SRR7978_TRINITY_DN14366_c0_g1::SRR7978_TRINITY_DN14366_c0_g1_i3::g.26460::m.26460	IS_216438_Aes_Skin_Mucus_lane_Pann_DB	1	0.000213652	3	4	6	0.174157	21 kDa
SRR7979_TRINITY_DN17125_c2_g3::SRR7979_TRINITY_DN17125_c2_g3_i4::g.49980::m.49980 [type:complete len:592 gc:universal SRR7979_TRINITY_DN17125_c2_g3_i4:521-2296(+)]	type:complete len:592 gc:universal SRR7979_TRINITY_DN17125_c2_g3_i4:521-2296(+)	SRR7979_TRINITY_DN17125_c2_g3::SRR7979_TRINITY_DN17125_c2_g3_i4::g.49980::m.49980	IS_216438_Aes_Skin_Mucus_lane_Pann_DB	1	0.000213652	2	2	6	0.0592217	70 kDa
SRR7979_TRINITY_DN17097_c1_g1::SRR7979_TRINITY_DN17097_c1_g1_i1::g.68042::m.68042 [type:complete len:221 gc:universal SRR7979_TRINITY_DN17097_c1_g1_i1:277-939(+)]	type:complete len:221 gc:universal SRR7979_TRINITY_DN17097_c1_g1_i1:277-939(+)	SRR7979_TRINITY_DN17097_c1_g1::SRR7979_TRINITY_DN17097_c1_g1_i1::g.68042::m.68042	IS_216438_Aes_Skin_Mucus_lane_Pann_DB	1	0.000427305	4	4	12	0.395455	26 kDa
SRR7980_TRINITY_DN17784_c5_g3::SRR7980_TRINITY_DN17784_c5_g3_i1::g.87007::m.87007 [type:complete len:229 gc:universal SRR7980_TRINITY_DN17784_c5_g3_i1:1177-1863(+)]	type:complete len:229 gc:universal SRR7980_TRINITY_DN17784_c5_g3_i1:1177-1863(+)	SRR7980_TRINITY_DN17784_c5_g3::SRR7980_TRINITY_DN17784_c5_g3_i1::g.87007::m.87007	IS_216438_Aes_Skin_Mucus_lane_Pann_DB	1	0.000391696	3	4	11	0.359649	26 kDa
SRR7914_TRINITY_DN31288_c2_g3::SRR7914_TRINITY_DN31288_c2_g3_i2::g.21242::m.21242 [type:complete len:242 gc:universal SRR7914_TRINITY_DN31288_c2_g3_i2:163-888(+)]	type:complete len:242 gc:universal SRR7914_TRINITY_DN31288_c2_g3_i2:163-888(+)	SRR7914_TRINITY_DN31288_c2_g3::SRR7914_TRINITY_DN31288_c2_g3_i2::g.21242::m.21242	IS_216438_Aes_Skin_Mucus_lane_Pann_DB	1	0.000213652	5	5	6	0.286307	26 kDa
SRR7979_TRINITY_DN18940_c11_g1::SRR7979_TRINITY_DN18940_c11_g1_i1::g.56320::m.56320 [type:complete len:219 gc:universal SRR7979_TRINITY_DN18940_c11_g1_i1:2478-1822(-)]	type:complete len:219 gc:universal SRR7978_TRINITY_DN18320_c4_g2_i7:187-843(+)	SRR7978_TRINITY_DN18320_c4_g2::SRR7978_TRINITY_DN18320_c4_g2_i7::g.26854::m.26854	IS_216438_Aes_Skin_Mucus_lane_Pann_DB	1	0.000249261	4	4	7	0.188073	25 kDa
SRR7980_TRINITY_DN18384_c1_g5::SRR7980_TRINITY_DN18384_c1_g5_i1::g.72086::m.72086 [type:complete len:526 gc:universal SRR7980_TRINITY_DN18384_c1_g5_i1:127-1704(+)]	type:complete len:526 gc:universal SRR7980_TRINITY_DN18384_c1_g5_i1:127-1704(+)	SRR7980_TRINITY_DN18384_c1_g5::SRR7980_TRINITY_DN18384_c1_g5_i1::g.72086::m.72086	IS_216438_Aes_Skin_Mucus_lane_Pann_DB	1	0.00028487	3	5	8	0.0514286	59 kDa
SRR8017_TRINITY_DN23899_c0_g1::SRR8017_TRINITY_DN23899_c0_g1_i1::g.110687::m.110687 [type:complete len:840 gc:universal SRR8017_TRINITY_DN23899_c0_g1_i1:209-2728(+)]	type:complete len:840 gc:universal SRR8017_TRINITY_DN23899_c0_g1_i1:209-2728(+)	SRR8017_TRINITY_DN23899_c0_g1::SRR8017_TRINITY_DN23899_c0_g1_i1::g.110687::m.110687	IS_216438_Aes_Skin_Mucus_lane_Pann_DB	0.99	0.000106826	3	3	3	0.0369487	93 kDa
SRR7914_TRINITY_DN25712_c0_g1::SRR7914_TRINITY_DN25712_c0_g1_i1::g.19939::m.19939 [type:5prime_partial len:536 gc:universal SRR7914_TRINITY_DN25712_c0_g1_i1:1792-185(-)]	type:5prime_partial len:593 gc:universal SRR8017_TRINITY_DN26839_c1_g2_i13:3-1781(+)	SRR8017_TRINITY_DN26839_c1_g2::SRR8017_TRINITY_DN26839_c1_g2_i13::g.111267::m.111267	IS_216438_Aes_Skin_Mucus_lane_Pann_DB	1	0.000605348	4	4	17	0.233108	65 kDa
SRR7979_TRINITY_DN17512_c7_g1::SRR7979_TRINITY_DN17512_c7_g1_i2::g.50351::m.50351 [type:complete len:1014 gc:universal SRR7979_TRINITY_DN17512_c7_g1_i2:72-3113(+)]	type:complete len:1014 gc:universal SRR7979_TRINITY_DN17512_c7_g1_i2:72-3113(+)	SRR7979_TRINITY_DN17512_c7_g1::SRR7979_TRINITY_DN17512_c7_g1_i2::g.50351::m.50351	IS_216438_Aes_Skin_Mucus_lane_Pann_DB	1	0.000356087	6	6	10	0.0760118	115 kDa
SRR7978_TRINITY_DN15138_c0_g1::SRR7978_TRINITY_DN15138_c0_g1_i3::g.37527::m.37527 [type:complete len:429 gc:universal SRR7978_TRINITY_DN15138_c0_g1_i3:323-1609(+)]	type:complete len:405 gc:universal SRR7978_TRINITY_DN15138_c0_g1_i1:384-1598(+)	SRR7978_TRINITY_DN15138_c0_g1::SRR7978_TRINITY_DN15138_c0_g1_i1::g.37526::m.37526	IS_216438_Aes_Skin_Mucus_lane_Pann_DB	1	0.000320479	6	6	9	0.207921	45 kDa
SRR8017_TRINITY_DN24202_c0_g1::SRR8017_TRINITY_DN24202_c0_g1_i1::g.106402::m.106402 [type:complete len:567 gc:universal SRR8017_TRINITY_DN24202_c0_g1_i1:151-1851(+)]	type:complete len:539 gc:universal SRR8020_TRINITY_DN25624_c0_g1_i1:153-1769(+)	SRR8020_TRINITY_DN25624_c0_g1::SRR8020_TRINITY_DN25624_c0_g1_i1::g.131770::m.131770	IS_216438_Aes_Skin_Mucus_lane_Pann_DB	1	0.000391696	7	8	11	0.185874	62 kDa
SRR7914_TRINITY_DN28925_c0_g3::SRR7914_TRINITY_DN28925_c0_g3_i1::g.22413::m.22413 [type:complete len:130 gc:universal SRR7914_TRINITY_DN28925_c0_g3_i1:4137-3748(-)]	type:complete len:130 gc:universal SRR7914_TRINITY_DN28925_c0_g3_i1:4137-3748(-)	SRR7914_TRINITY_DN28925_c0_g3::SRR7914_TRINITY_DN28925_c0_g3_i1::g.22413::m.22413	IS_216438_Aes_Skin_Mucus_lane_Pann_DB	1	0.00135313	3	4	38	0.364341	14 kDa
SRR7979_TRINITY_DN19175_c2_g2::SRR7979_TRINITY_DN19175_c2_g2_i4::g.61265::m.61265 [type:complete len:300 gc:universal SRR7979_TRINITY_DN19175_c2_g2_i4:709-1608(+)]	type:5prime_partial len:325 gc:universal SRR1330_TRINITY_DN114753_c0_g1_i1:1286-312(-)	SRR1330_TRINITY_DN114753_c0_g1::SRR1330_TRINITY_DN114753_c0_g1_i1::g.240641::m.240641	IS_216438_Aes_Skin_Mucus_lane_Pann_DB	0.99	0.000178044	0	0	5	0.111111	36 kDa
SRR7914_TRINITY_DN31227_c7_g1::SRR7914_TRINITY_DN31227_c7_g1_i5::g.21363::m.21363 [type:complete len:174 gc:universal SRR7914_TRINITY_DN31227_c7_g1_i5:280-801(+)]	type:complete len:140 gc:universal SRR1329_TRINITY_DN337269_c0_g1_i2:498-79(-)	SRR1329_TRINITY_DN337269_c0_g1::SRR1329_TRINITY_DN337269_c0_g1_i2::g.195924::m.195924	IS_216438_Aes_Skin_Mucus_lane_Pann_DB	1	0.000178044	4	4	5	0.330935	14 kDa
SRR1330_TRINITY_DN111419_c0_g1::SRR1330_TRINITY_DN111419_c0_g1_i3::g.217976::m.217976 [type:3prime_partial len:388 gc:universal SRR1330_TRINITY_DN111419_c0_g1_i3:1163-3(-)]	type:3prime_partial len:388 gc:universal SRR1330_TRINITY_DN111419_c0_g1_i3:1163-3(-)	SRR1330_TRINITY_DN111419_c0_g1::SRR1330_TRINITY_DN111419_c0_g1_i3::g.217976::m.217976	IS_216438_Aes_Skin_Mucus_lane_Pann_DB	1	0.000106826	2	2	3	0.0775194	44 kDa
SRR7980_TRINITY_DN19176_c2_g1::SRR7980_TRINITY_DN19176_c2_g1_i2::g.85355::m.85355 [type:complete len:115 gc:universal SRR7980_TRINITY_DN19176_c2_g1_i2:2870-2526(-)]	type:complete len:115 gc:universal SRR7980_TRINITY_DN19176_c2_g1_i2:2870-2526(-)	SRR7980_TRINITY_DN19176_c2_g1::SRR7980_TRINITY_DN19176_c2_g1_i2::g.85355::m.85355	IS_216438_Aes_Skin_Mucus_lane_Pann_DB	1	0.000178044	3	3	5	0.587719	13 kDa
SRR7978_TRINITY_DN19337_c4_g8::SRR7978_TRINITY_DN19337_c4_g8_i1::g.40718::m.40718 [type:complete len:149 gc:universal SRR7978_TRINITY_DN19337_c4_g8_i1:4734-4288(-)]	type:complete len:192 gc:universal SRR7980_TRINITY_DN19654_c4_g1_i6:2329-1754(-)	SRR7980_TRINITY_DN19654_c4_g1::SRR7980_TRINITY_DN19654_c4_g1_i6::g.76374::m.76374	IS_216438_Aes_Skin_Mucus_lane_Pann_DB	1	0.000106826	1	1	3	0.146597	21 kDa
SRR7978_TRINITY_DN19248_c1_g1::SRR7978_TRINITY_DN19248_c1_g1_i1::g.30534::m.30534 [type:complete len:525 gc:universal SRR7978_TRINITY_DN19248_c1_g1_i1:3059-1485(-)]	type:complete len:525 gc:universal SRR7978_TRINITY_DN19248_c1_g1_i1:3059-1485(-)	SRR7978_TRINITY_DN19248_c1_g1::SRR7978_TRINITY_DN19248_c1_g1_i1::g.30534::m.30534	IS_216438_Aes_Skin_Mucus_lane_Pann_DB	1	0.000213652	5	5	6	0.0992366	59 kDa
SRR7979_TRINITY_DN17793_c0_g1::SRR7979_TRINITY_DN17793_c0_g1_i12::g.62925::m.62925 [type:complete len:534 gc:universal SRR7979_TRINITY_DN17793_c0_g1_i12:549-2150(+)]	type:complete len:534 gc:universal SRR7979_TRINITY_DN17793_c0_g1_i12:549-2150(+)	SRR7979_TRINITY_DN17793_c0_g1::SRR7979_TRINITY_DN17793_c0_g1_i12::g.62925::m.62925	IS_216438_Aes_Skin_Mucus_lane_Pann_DB	1	0.000356087	1	2	10	0.172608	60 kDa
SRR1329_TRINITY_DN353076_c0_g1::SRR1329_TRINITY_DN353076_c0_g1_i5::g.196396::m.196396 [type:internal len:248 gc:universal SRR1329_TRINITY_DN353076_c0_g1_i5:742-2(-)]	type:complete len:331 gc:universal SRR7978_TRINITY_DN19838_c10_g2_i10:358-1350(+)	SRR7978_TRINITY_DN19838_c10_g2::SRR7978_TRINITY_DN19838_c10_g2_i10::g.36296::m.36296	IS_216438_Aes_Skin_Mucus_lane_Pann_DB	1	0.000178044	3	3	5	0.121212	36 kDa
SRR8017_TRINITY_DN16427_c0_g1::SRR8017_TRINITY_DN16427_c0_g1_i1::g.121720::m.121720 [type:5prime_partial len:245 gc:universal SRR8017_TRINITY_DN16427_c0_g1_i1:1074-340(-)]	type:5prime_partial len:245 gc:universal SRR8017_TRINITY_DN16427_c0_g1_i1:1074-340(-)	SRR8017_TRINITY_DN16427_c0_g1::SRR8017_TRINITY_DN16427_c0_g1_i1::g.121720::m.121720	IS_216438_Aes_Skin_Mucus_lane_Pann_DB	1	0.000249261	2	2	7	0.213115	28 kDa
SRR7979_TRINITY_DN17762_c4_g3::SRR7979_TRINITY_DN17762_c4_g3_i3::g.62933::m.62933 [type:complete len:245 gc:universal SRR7979_TRINITY_DN17762_c4_g3_i3:2738-2004(-)]	type:complete len:248 gc:universal SRR7979_TRINITY_DN16195_c0_g2_i2:345-1088(+)	SRR7979_TRINITY_DN16195_c0_g2::SRR7979_TRINITY_DN16195_c0_g2_i2::g.50943::m.50943	IS_216438_Aes_Skin_Mucus_lane_Pann_DB	1	0.000356087	2	3	10	0.238866	28 kDa
SRR7914_TRINITY_DN29683_c0_g1::SRR7914_TRINITY_DN29683_c0_g1_i2::g.7248::m.7248 [type:complete len:382 gc:universal SRR7914_TRINITY_DN29683_c0_g1_i2:239-1384(+)]	type:complete len:382 gc:universal SRR8017_TRINITY_DN26256_c5_g1_i6:181-1326(+)	SRR8017_TRINITY_DN26256_c5_g1::SRR8017_TRINITY_DN26256_c5_g1_i6::g.109725::m.109725	IS_216438_Aes_Skin_Mucus_lane_Pann_DB	1	0.000178044	4	4	5	0.12336	43 kDa
SRR7979_TRINITY_DN35936_c0_g1::SRR7979_TRINITY_DN35936_c0_g1_i1::g.52781::m.52781 [type:complete len:228 gc:universal SRR7979_TRINITY_DN35936_c0_g1_i1:267-950(+)]	type:complete len:228 gc:universal SRR7979_TRINITY_DN35936_c0_g1_i1:267-950(+)	SRR7979_TRINITY_DN35936_c0_g1::SRR7979_TRINITY_DN35936_c0_g1_i1::g.52781::m.52781	IS_216438_Aes_Skin_Mucus_lane_Pann_DB	1	0.000213652	3	3	6	0.162996	25 kDa
SRR8000_TRINITY_DN17284_c0_g1::SRR8000_TRINITY_DN17284_c0_g1_i1::g.101006::m.101006 [type:5prime_partial len:370 gc:universal SRR8000_TRINITY_DN17284_c0_g1_i1:1401-292(-)]	type:5prime_partial len:370 gc:universal SRR8000_TRINITY_DN17284_c0_g1_i1:1401-292(-)	SRR8000_TRINITY_DN17284_c0_g1::SRR8000_TRINITY_DN17284_c0_g1_i1::g.101006::m.101006	IS_216438_Aes_Skin_Mucus_lane_Pann_DB	1	0.000142435	3	3	4	0.0867209	42 kDa
SRR7979_TRINITY_DN18709_c1_g7::SRR7979_TRINITY_DN18709_c1_g7_i1::g.55472::m.55472 [type:complete len:276 gc:universal SRR7979_TRINITY_DN18709_c1_g7_i1:331-1158(+)]	type:3prime_partial len:211 gc:universal SRR1329_TRINITY_DN354816_c3_g2_i11:104-733(+)	SRR1329_TRINITY_DN354816_c3_g2::SRR1329_TRINITY_DN354816_c3_g2_i11::g.190263::m.190263	IS_216438_Aes_Skin_Mucus_lane_Pann_DB	1	0.00028487	4	4	8	0.252381	24 kDa
SRR7979_TRINITY_DN17802_c2_g2::SRR7979_TRINITY_DN17802_c2_g2_i1::g.48903::m.48903 [type:complete len:395 gc:universal SRR7979_TRINITY_DN17802_c2_g2_i1:406-1590(+)]	type:complete len:395 gc:universal SRR7979_TRINITY_DN17802_c2_g2_i1:406-1590(+)	SRR7979_TRINITY_DN17802_c2_g2::SRR7979_TRINITY_DN17802_c2_g2_i1::g.48903::m.48903	IS_216438_Aes_Skin_Mucus_lane_Pann_DB	1	0.000213652	3	3	6	0.116751	44 kDa
SRR7978_TRINITY_DN14382_c0_g1::SRR7978_TRINITY_DN14382_c0_g1_i3::g.26425::m.26425 [type:complete len:166 gc:universal SRR7978_TRINITY_DN14382_c0_g1_i3:544-47(-)]	type:complete len:168 gc:universal SRR8020_TRINITY_DN30239_c3_g2_i1:154-657(+)	SRR8020_TRINITY_DN30239_c3_g2::SRR8020_TRINITY_DN30239_c3_g2_i1::g.136697::m.136697	IS_216438_Aes_Skin_Mucus_lane_Pann_DB	1	0.000213652	4	4	6	0.323353	18 kDa
SRR7914_TRINITY_DN30092_c0_g2::SRR7914_TRINITY_DN30092_c0_g2_i1::g.321::m.321-DECOY [type:complete len:111 gc:universal SRR7914_TRINITY_DN30092_c0_g2_i1:202-534(+)]	type:complete len:111 gc:universal SRR8020_TRINITY_DN29215_c3_g2_i1:197-529(+)	SRR8020_TRINITY_DN29215_c3_g2::SRR8020_TRINITY_DN29215_c3_g2_i1::g.122571::m.122571	IS_216438_Aes_Skin_Mucus_lane_Pann_DB	1	0.000178044	2	3	5	0.190909	13 kDa
SRR7914_TRINITY_DN30769_c12_g1::SRR7914_TRINITY_DN30769_c12_g1_i3::g.4912::m.4912 [type:complete len:1149 gc:universal SRR7914_TRINITY_DN30769_c12_g1_i3:293-3739(+)]	type:complete len:1149 gc:universal SRR7914_TRINITY_DN30769_c12_g1_i3:293-3739(+)	SRR7914_TRINITY_DN30769_c12_g1::SRR7914_TRINITY_DN30769_c12_g1_i3::g.4912::m.4912	IS_216438_Aes_Skin_Mucus_lane_Pann_DB	1	0.000106826	3	3	3	0.0313589	130 kDa
SRR7978_TRINITY_DN10664_c0_g1::SRR7978_TRINITY_DN10664_c0_g1_i1::g.43162::m.43162 [type:complete len:107 gc:universal SRR7978_TRINITY_DN10664_c0_g1_i1:492-172(-)]	type:complete len:107 gc:universal SRR7978_TRINITY_DN10664_c0_g1_i1:492-172(-)	SRR7978_TRINITY_DN10664_c0_g1::SRR7978_TRINITY_DN10664_c0_g1_i1::g.43162::m.43162	IS_216438_Aes_Skin_Mucus_lane_Pann_DB	1	0.000106826	2	2	3	0.254717	12 kDa
SRR7978_TRINITY_DN17607_c0_g3::SRR7978_TRINITY_DN17607_c0_g3_i2::g.41392::m.41392 [type:complete len:2541 gc:universal SRR7978_TRINITY_DN17607_c0_g3_i2:772-8394(+)]	type:complete len:2563 gc:universal SRR1330_TRINITY_DN124401_c1_g1_i4:7867-179(-)	SRR1330_TRINITY_DN124401_c1_g1::SRR1330_TRINITY_DN124401_c1_g1_i4::g.230380::m.230380	IS_216438_Aes_Skin_Mucus_lane_Pann_DB	1	0.000320479	7	7	9	0.0413739	274 kDa
SRR7914_TRINITY_DN31559_c5_g1::SRR7914_TRINITY_DN31559_c5_g1_i7::g.9391::m.9391 [type:5prime_partial len:153 gc:universal SRR7914_TRINITY_DN31559_c5_g1_i7:1334-876(-)]	type:5prime_partial len:153 gc:universal SRR7914_TRINITY_DN31559_c5_g1_i7:1334-876(-)	SRR7914_TRINITY_DN31559_c5_g1::SRR7914_TRINITY_DN31559_c5_g1_i7::g.9391::m.9391	IS_216438_Aes_Skin_Mucus_lane_Pann_DB	1	7.12175e-05	1	1	2	0.190789	17 kDa
SRR7914_TRINITY_DN32428_c2_g2::SRR7914_TRINITY_DN32428_c2_g2_i8::g.4502::m.4502 [type:complete len:153 gc:universal SRR7914_TRINITY_DN32428_c2_g2_i8:2361-1903(-)]	type:complete len:153 gc:universal SRR7914_TRINITY_DN32428_c2_g2_i8:2361-1903(-)	SRR7914_TRINITY_DN32428_c2_g2::SRR7914_TRINITY_DN32428_c2_g2_i8::g.4502::m.4502	IS_216438_Aes_Skin_Mucus_lane_Pann_DB	1	0.000106826	3	3	3	0.190789	18 kDa
SRR7980_TRINITY_DN4512_c0_g1::SRR7980_TRINITY_DN4512_c0_g1_i1::g.79882::m.79882 [type:complete len:194 gc:universal SRR7980_TRINITY_DN4512_c0_g1_i1:284-865(+)]	type:complete len:195 gc:universal SRR1329_TRINITY_DN346572_c7_g1_i6:642-58(-)	SRR1329_TRINITY_DN346572_c7_g1::SRR1329_TRINITY_DN346572_c7_g1_i6::g.199523::m.199523	IS_216438_Aes_Skin_Mucus_lane_Pann_DB	1	0.000178044	3	3	5	0.14433	21 kDa
SRR7914_TRINITY_DN23876_c0_g1::SRR7914_TRINITY_DN23876_c0_g1_i1::g.12220::m.12220 [type:complete len:299 gc:universal SRR7914_TRINITY_DN23876_c0_g1_i1:1318-422(-)]	type:complete len:299 gc:universal SRR1330_TRINITY_DN117450_c14_g1_i2:1263-367(-)	SRR1330_TRINITY_DN117450_c14_g1::SRR1330_TRINITY_DN117450_c14_g1_i2::g.221645::m.221645	IS_216438_Aes_Skin_Mucus_lane_Pann_DB	1	7.12175e-05	2	2	2	0.0771812	33 kDa
SRR7980_TRINITY_DN19040_c0_g1::SRR7980_TRINITY_DN19040_c0_g1_i3::g.69733::m.69733 [type:complete len:204 gc:universal SRR7980_TRINITY_DN19040_c0_g1_i3:2441-3052(+)]	type:5prime_partial len:214 gc:universal SRR7914_TRINITY_DN22617_c0_g1_i1:1-642(+)	SRR7914_TRINITY_DN22617_c0_g1::SRR7914_TRINITY_DN22617_c0_g1_i1::g.19372::m.19372	IS_216438_Aes_Skin_Mucus_lane_Pann_DB	1	0.000142435	2	3	4	0.117371	24 kDa
SRR7978_TRINITY_DN19794_c0_g2::SRR7978_TRINITY_DN19794_c0_g2_i1::g.27872::m.27872 [type:complete len:532 gc:universal SRR7978_TRINITY_DN19794_c0_g2_i1:682-2277(+)]	type:complete len:532 gc:universal SRR7978_TRINITY_DN19794_c0_g2_i1:682-2277(+)	SRR7978_TRINITY_DN19794_c0_g2::SRR7978_TRINITY_DN19794_c0_g2_i1::g.27872::m.27872	IS_216438_Aes_Skin_Mucus_lane_Pann_DB	1	0.000356087	4	4	10	0.126177	59 kDa
SRR1330_TRINITY_DN25028_c0_g1::SRR1330_TRINITY_DN25028_c0_g1_i1::g.265450::m.265450 [type:internal len:119 gc:universal SRR1330_TRINITY_DN25028_c0_g1_i1:354-1(-)]	type:internal len:119 gc:universal SRR1330_TRINITY_DN25028_c0_g1_i1:354-1(-)	SRR1330_TRINITY_DN25028_c0_g1::SRR1330_TRINITY_DN25028_c0_g1_i1::g.265450::m.265450	IS_216438_Aes_Skin_Mucus_lane_Pann_DB	1	0.000106826	2	2	3	0.245763	13 kDa
SRR8017_TRINITY_DN25709_c0_g4::SRR8017_TRINITY_DN25709_c0_g4_i4::g.118624::m.118624 [type:complete len:1656 gc:universal SRR8017_TRINITY_DN25709_c0_g4_i4:60-5027(+)]	type:complete len:1656 gc:universal SRR8017_TRINITY_DN25709_c0_g4_i4:60-5027(+)	SRR8017_TRINITY_DN25709_c0_g4::SRR8017_TRINITY_DN25709_c0_g4_i4::g.118624::m.118624	IS_216438_Aes_Skin_Mucus_lane_Pann_DB	1	0.000213652	4	4	6	0.0513595	185 kDa
SRR7979_TRINITY_DN12623_c0_g1::SRR7979_TRINITY_DN12623_c0_g1_i3::g.66511::m.66511 [type:complete len:154 gc:universal SRR7979_TRINITY_DN12623_c0_g1_i3:176-637(+)]	type:3prime_partial len:169 gc:universal SRR1329_TRINITY_DN298527_c1_g1_i1:3-506(+)	SRR1329_TRINITY_DN298527_c1_g1::SRR1329_TRINITY_DN298527_c1_g1_i1::g.203717::m.203717	IS_216438_Aes_Skin_Mucus_lane_Pann_DB	1	0.000142435	3	3	4	0.279762	18 kDa
SRR7979_TRINITY_DN19172_c3_g3::SRR7979_TRINITY_DN19172_c3_g3_i1::g.61270::m.61270 [type:complete len:647 gc:universal SRR7979_TRINITY_DN19172_c3_g3_i1:6407-4467(-)]	type:complete len:647 gc:universal SRR7979_TRINITY_DN19172_c3_g3_i1:6407-4467(-)	SRR7979_TRINITY_DN19172_c3_g3::SRR7979_TRINITY_DN19172_c3_g3_i1::g.61270::m.61270	IS_216438_Aes_Skin_Mucus_lane_Pann_DB	1	0.000213652	4	4	6	0.0913313	71 kDa
SRR7914_TRINITY_DN32116_c0_g1::SRR7914_TRINITY_DN32116_c0_g1_i12::g.24117::m.24117 [type:complete len:563 gc:universal SRR7914_TRINITY_DN32116_c0_g1_i12:3209-1521(-)]	type:complete len:563 gc:universal SRR7979_TRINITY_DN17618_c0_g2_i8:320-2008(+)	SRR7979_TRINITY_DN17618_c0_g2::SRR7979_TRINITY_DN17618_c0_g2_i8::g.64533::m.64533	IS_216438_Aes_Skin_Mucus_lane_Pann_DB	1	0.000106826	2	2	3	0.0498221	63 kDa
SRR7978_TRINITY_DN17298_c1_g1::SRR7978_TRINITY_DN17298_c1_g1_i2::g.43505::m.43505 [type:3prime_partial len:369 gc:universal SRR7978_TRINITY_DN17298_c1_g1_i2:147-1250(+)]	type:3prime_partial len:262 gc:universal SRR1329_TRINITY_DN348505_c11_g1_i2:783-1(-)	SRR1329_TRINITY_DN348505_c11_g1::SRR1329_TRINITY_DN348505_c11_g1_i2::g.194557::m.194557	IS_216438_Aes_Skin_Mucus_lane_Pann_DB	1	0.000213652	4	4	6	0.264368	27 kDa
SRR7978_TRINITY_DN18830_c0_g1::SRR7978_TRINITY_DN18830_c0_g1_i1::g.34907::m.34907 [type:complete len:205 gc:universal SRR7978_TRINITY_DN18830_c0_g1_i1:781-167(-)]	type:complete len:243 gc:universal SRR8017_TRINITY_DN26982_c1_g1_i3:252-980(+)	SRR8017_TRINITY_DN26982_c1_g1::SRR8017_TRINITY_DN26982_c1_g1_i3::g.110024::m.110024	IS_216438_Aes_Skin_Mucus_lane_Pann_DB	1	0.000142435	2	2	4	0.173554	28 kDa
SRR7978_TRINITY_DN19737_c1_g1::SRR7978_TRINITY_DN19737_c1_g1_i1::g.27487::m.27487 [type:complete len:161 gc:universal SRR7978_TRINITY_DN19737_c1_g1_i1:325-807(+)]	type:complete len:161 gc:universal SRR7978_TRINITY_DN19737_c1_g1_i1:325-807(+)	SRR7978_TRINITY_DN19737_c1_g1::SRR7978_TRINITY_DN19737_c1_g1_i1::g.27487::m.27487	IS_216438_Aes_Skin_Mucus_lane_Pann_DB	1	0.000213652	3	5	6	0.2625	18 kDa
SRR1329_TRINITY_DN333697_c0_g1::SRR1329_TRINITY_DN333697_c0_g1_i3::g.198741::m.198741 [type:complete len:102 gc:universal SRR1329_TRINITY_DN333697_c0_g1_i3:130-435(+)]	type:complete len:120 gc:universal SRR7978_TRINITY_DN12937_c0_g1_i2:273-632(+)	SRR7978_TRINITY_DN12937_c0_g1::SRR7978_TRINITY_DN12937_c0_g1_i2::g.31094::m.31094	IS_216438_Aes_Skin_Mucus_lane_Pann_DB	1	0.00028487	2	3	8	0.193277	13 kDa
sp|ALBU_HUMAN| [sp|ALBU_HUMAN|]	sp|ALBU_HUMAN|	sp|ALBU_HUMAN|	IS_216438_Aes_Skin_Mucus_lane_Pann_DB	1	0.00028487	4	4	8	0.133005	69 kDa
SRR1330_TRINITY_DN55115_c0_g1::SRR1330_TRINITY_DN55115_c0_g1_i1::g.263365::m.263365 [type:internal len:101 gc:universal SRR1330_TRINITY_DN55115_c0_g1_i1:300-1(-)]	type:internal len:101 gc:universal SRR1330_TRINITY_DN55115_c0_g1_i1:300-1(-)	SRR1330_TRINITY_DN55115_c0_g1::SRR1330_TRINITY_DN55115_c0_g1_i1::g.263365::m.263365	IS_216438_Aes_Skin_Mucus_lane_Pann_DB	1	0.000106826	2	2	3	0.17	11 kDa
SRR1330_TRINITY_DN116866_c6_g1::SRR1330_TRINITY_DN116866_c6_g1_i1::g.234746::m.234746 [type:5prime_partial len:194 gc:universal SRR1330_TRINITY_DN116866_c6_g1_i1:692-111(-)]	type:internal len:292 gc:universal SRR1330_TRINITY_DN116866_c6_g1_i2:873-1(-)	SRR1330_TRINITY_DN116866_c6_g1::SRR1330_TRINITY_DN116866_c6_g1_i2::g.234747::m.234747	IS_216438_Aes_Skin_Mucus_lane_Pann_DB	1	0.000427305	1	2	12	0.243986	32 kDa
SRR7980_TRINITY_DN16431_c0_g1::SRR7980_TRINITY_DN16431_c0_g1_i1::g.93171::m.93171 [type:complete len:232 gc:universal SRR7980_TRINITY_DN16431_c0_g1_i1:304-999(+)]	type:complete len:232 gc:universal SRR7980_TRINITY_DN16431_c0_g1_i1:304-999(+)	SRR7980_TRINITY_DN16431_c0_g1::SRR7980_TRINITY_DN16431_c0_g1_i1::g.93171::m.93171	IS_216438_Aes_Skin_Mucus_lane_Pann_DB	1	0.000178044	3	3	5	0.164502	25 kDa
SRR1330_TRINITY_DN123871_c0_g5::SRR1330_TRINITY_DN123871_c0_g5_i2::g.209378::m.209378 [type:complete len:377 gc:universal SRR1330_TRINITY_DN123871_c0_g5_i2:1904-774(-)]	type:3prime_partial len:362 gc:universal SRR7978_TRINITY_DN19729_c1_g7_i1:1085-3(-)	SRR7978_TRINITY_DN19729_c1_g7::SRR7978_TRINITY_DN19729_c1_g7_i1::g.27679::m.27679	IS_216438_Aes_Skin_Mucus_lane_Pann_DB	1	0.00765588	1	3	215	0.739612	40 kDa
SRR7914_TRINITY_DN28925_c0_g3::SRR7914_TRINITY_DN28925_c0_g3_i1::g.22413::m.22413 [type:complete len:130 gc:universal SRR7914_TRINITY_DN28925_c0_g3_i1:4137-3748(-)]	type:complete len:129 gc:universal SRR7914_TRINITY_DN27904_c0_g1_i3:87-473(+)	SRR7914_TRINITY_DN27904_c0_g1::SRR7914_TRINITY_DN27904_c0_g1_i3::g.3372::m.3372	IS_216438_Aes_Skin_Mucus_lane_Pann_DB	1	0.000640957	2	3	18	0.257812	14 kDa
SRR7978_TRINITY_DN18339_c0_g2::SRR7978_TRINITY_DN18339_c0_g2_i1::g.26858::m.26858 [type:complete len:170 gc:universal SRR7978_TRINITY_DN18339_c0_g2_i1:265-774(+)]	type:5prime_partial len:158 gc:universal SRR1330_TRINITY_DN115807_c10_g2_i2:771-298(-)	SRR1330_TRINITY_DN115807_c10_g2::SRR1330_TRINITY_DN115807_c10_g2_i2::g.241342::m.241342	IS_216438_Aes_Skin_Mucus_lane_Pann_DB	1	0.000213652	2	3	6	0.33121	18 kDa
SRR7978_TRINITY_DN17764_c1_g7::SRR7978_TRINITY_DN17764_c1_g7_i1::g.39422::m.39422 [type:complete len:763 gc:universal SRR7978_TRINITY_DN17764_c1_g7_i1:3342-1054(-)]	type:complete len:763 gc:universal SRR7978_TRINITY_DN17764_c1_g7_i1:3342-1054(-)	SRR7978_TRINITY_DN17764_c1_g7::SRR7978_TRINITY_DN17764_c1_g7_i1::g.39422::m.39422	IS_216438_Aes_Skin_Mucus_lane_Pann_DB	1	0.000106826	2	2	3	0.0406824	85 kDa
SRR7979_TRINITY_DN18160_c1_g2::SRR7979_TRINITY_DN18160_c1_g2_i1::g.51968::m.51968 [type:complete len:1258 gc:universal SRR7979_TRINITY_DN18160_c1_g2_i1:4319-546(-)]	type:complete len:1258 gc:universal SRR7979_TRINITY_DN18160_c1_g2_i1:4319-546(-)	SRR7979_TRINITY_DN18160_c1_g2::SRR7979_TRINITY_DN18160_c1_g2_i1::g.51968::m.51968	IS_216438_Aes_Skin_Mucus_lane_Pann_DB	1	0.000213652	3	5	6	0.0302307	140 kDa
SRR7979_TRINITY_DN4917_c0_g1::SRR7979_TRINITY_DN4917_c0_g1_i1::g.62312::m.62312 [type:complete len:287 gc:universal SRR7979_TRINITY_DN4917_c0_g1_i1:1769-909(-)]	type:complete len:287 gc:universal SRR7979_TRINITY_DN4917_c0_g1_i1:1769-909(-)	SRR7979_TRINITY_DN4917_c0_g1::SRR7979_TRINITY_DN4917_c0_g1_i1::g.62312::m.62312	IS_216438_Aes_Skin_Mucus_lane_Pann_DB	1	0.00028487	4	4	8	0.346154	33 kDa
SRR7978_TRINITY_DN17436_c0_g2::SRR7978_TRINITY_DN17436_c0_g2_i1::g.35146::m.35146 [type:complete len:335 gc:universal SRR7978_TRINITY_DN17436_c0_g2_i1:1244-240(-)]	type:complete len:335 gc:universal SRR7978_TRINITY_DN17436_c0_g2_i1:1244-240(-)	SRR7978_TRINITY_DN17436_c0_g2::SRR7978_TRINITY_DN17436_c0_g2_i1::g.35146::m.35146	IS_216438_Aes_Skin_Mucus_lane_Pann_DB	1	0.000142435	4	4	4	0.158683	35 kDa
SRR7914_TRINITY_DN32753_c0_g1::SRR7914_TRINITY_DN32753_c0_g1_i2::g.18708::m.18708 [type:complete len:350 gc:universal SRR7914_TRINITY_DN32753_c0_g1_i2:384-1433(+)]	type:complete len:350 gc:universal SRR7914_TRINITY_DN32753_c0_g1_i2:384-1433(+)	SRR7914_TRINITY_DN32753_c0_g1::SRR7914_TRINITY_DN32753_c0_g1_i2::g.18708::m.18708	IS_216438_Aes_Skin_Mucus_lane_Pann_DB	1	0.000106826	3	3	3	0.103152	39 kDa
SRR8017_TRINITY_DN24031_c0_g1::SRR8017_TRINITY_DN24031_c0_g1_i1::g.104355::m.104355 [type:complete len:243 gc:universal SRR8017_TRINITY_DN24031_c0_g1_i1:914-186(-)]	type:complete len:243 gc:universal SRR8017_TRINITY_DN24031_c0_g1_i1:914-186(-)	SRR8017_TRINITY_DN24031_c0_g1::SRR8017_TRINITY_DN24031_c0_g1_i1::g.104355::m.104355	IS_216438_Aes_Skin_Mucus_lane_Pann_DB	1	0.000142435	2	2	4	0.144628	26 kDa
SRR7914_TRINITY_DN30399_c3_g2::SRR7914_TRINITY_DN30399_c3_g2_i4::g.7662::m.7662 [type:complete len:328 gc:universal SRR7914_TRINITY_DN30399_c3_g2_i4:2034-1051(-)]	type:complete len:328 gc:universal SRR7914_TRINITY_DN30399_c3_g2_i4:2034-1051(-)	SRR7914_TRINITY_DN30399_c3_g2::SRR7914_TRINITY_DN30399_c3_g2_i4::g.7662::m.7662	IS_216438_Aes_Skin_Mucus_lane_Pann_DB	1	0.000142435	3	3	4	0.165138	36 kDa
SRR8000_TRINITY_DN21201_c9_g2::SRR8000_TRINITY_DN21201_c9_g2_i2::g.98114::m.98114 [type:complete len:334 gc:universal SRR8000_TRINITY_DN21201_c9_g2_i2:296-1297(+)]	type:complete len:236 gc:universal SRR1329_TRINITY_DN345333_c2_g2_i5:76-783(+)	SRR1329_TRINITY_DN345333_c2_g2::SRR1329_TRINITY_DN345333_c2_g2_i5::g.188381::m.188381	IS_216438_Aes_Skin_Mucus_lane_Pann_DB	1	0.000249261	3	3	7	0.221277	26 kDa
SRR7914_TRINITY_DN24869_c0_g2::SRR7914_TRINITY_DN24869_c0_g2_i1::g.8036::m.8036 [type:5prime_partial len:299 gc:universal SRR7914_TRINITY_DN24869_c0_g2_i1:3-899(+)]	type:5prime_partial len:299 gc:universal SRR7914_TRINITY_DN24869_c0_g2_i1:3-899(+)	SRR7914_TRINITY_DN24869_c0_g2::SRR7914_TRINITY_DN24869_c0_g2_i1::g.8036::m.8036	IS_216438_Aes_Skin_Mucus_lane_Pann_DB	1	0.000249261	2	2	7	0.208054	34 kDa
SRR1329_TRINITY_DN319901_c0_g1::SRR1329_TRINITY_DN319901_c0_g1_i2::g.185389::m.185389 [type:5prime_partial len:137 gc:universal SRR1329_TRINITY_DN319901_c0_g1_i2:1-411(+)]	type:5prime_partial len:137 gc:universal SRR1329_TRINITY_DN319901_c0_g1_i2:1-411(+)	SRR1329_TRINITY_DN319901_c0_g1::SRR1329_TRINITY_DN319901_c0_g1_i2::g.185389::m.185389	IS_216438_Aes_Skin_Mucus_lane_Pann_DB	1	0.000106826	2	2	3	0.242647	15 kDa
SRR7978_TRINITY_DN18029_c2_g4::SRR7978_TRINITY_DN18029_c2_g4_i1::g.44233::m.44233 [type:complete len:185 gc:universal SRR7978_TRINITY_DN18029_c2_g4_i1:198-752(+)]	type:complete len:202 gc:universal SRR1330_TRINITY_DN107085_c0_g1_i2:753-148(-)	SRR1330_TRINITY_DN107085_c0_g1::SRR1330_TRINITY_DN107085_c0_g1_i2::g.210726::m.210726	IS_216438_Aes_Skin_Mucus_lane_Pann_DB	1	0.000178044	3	3	5	0.189055	23 kDa
SRR7979_TRINITY_DN14453_c0_g1::SRR7979_TRINITY_DN14453_c0_g1_i1::g.53738::m.53738 [type:complete len:518 gc:universal SRR7979_TRINITY_DN14453_c0_g1_i1:247-1800(+)]	type:complete len:518 gc:universal SRR7979_TRINITY_DN14453_c0_g1_i1:247-1800(+)	SRR7979_TRINITY_DN14453_c0_g1::SRR7979_TRINITY_DN14453_c0_g1_i1::g.53738::m.53738	IS_216438_Aes_Skin_Mucus_lane_Pann_DB	1	7.12175e-05	2	2	2	0.0541586	57 kDa
SRR1329_TRINITY_DN353395_c0_g1::SRR1329_TRINITY_DN353395_c0_g1_i12::g.167865::m.167865 [type:complete len:177 gc:universal SRR1329_TRINITY_DN353395_c0_g1_i12:559-29(-)]	type:complete len:195 gc:universal SRR7914_TRINITY_DN28845_c1_g1_i4:114-698(+)	SRR7914_TRINITY_DN28845_c1_g1::SRR7914_TRINITY_DN28845_c1_g1_i4::g.6458::m.6458	IS_216438_Aes_Skin_Mucus_lane_Pann_DB	1	0.000178044	4	5	5	0.386598	22 kDa
SRR7914_TRINITY_DN30979_c5_g1::SRR7914_TRINITY_DN30979_c5_g1_i2::g.6748::m.6748 [type:3prime_partial len:381 gc:universal SRR7914_TRINITY_DN30979_c5_g1_i2:218-1357(+)]	type:complete len:487 gc:universal SRR7978_TRINITY_DN19026_c5_g1_i1:233-1693(+)	SRR7978_TRINITY_DN19026_c5_g1::SRR7978_TRINITY_DN19026_c5_g1_i1::g.25486::m.25486	IS_216438_Aes_Skin_Mucus_lane_Pann_DB	1	0.000106826	2	2	3	0.0740741	54 kDa
SRR7979_TRINITY_DN19462_c6_g2::SRR7979_TRINITY_DN19462_c6_g2_i2::g.69038::m.69038 [type:complete len:217 gc:universal SRR7979_TRINITY_DN19462_c6_g2_i2:324-974(+)]	type:complete len:245 gc:universal SRR1329_TRINITY_DN350504_c7_g1_i6:873-139(-)	SRR1329_TRINITY_DN350504_c7_g1::SRR1329_TRINITY_DN350504_c7_g1_i6::g.178056::m.178056	IS_216438_Aes_Skin_Mucus_lane_Pann_DB	1	0.000213652	5	5	6	0.22541	27 kDa
SRR8017_TRINITY_DN8565_c0_g1::SRR8017_TRINITY_DN8565_c0_g1_i1::g.102469::m.102469 [type:5prime_partial len:406 gc:universal SRR8017_TRINITY_DN8565_c0_g1_i1:2-1219(+)]	type:5prime_partial len:406 gc:universal SRR8017_TRINITY_DN8565_c0_g1_i1:2-1219(+)	SRR8017_TRINITY_DN8565_c0_g1::SRR8017_TRINITY_DN8565_c0_g1_i1::g.102469::m.102469	IS_216438_Aes_Skin_Mucus_lane_Pann_DB	1	0.00028487	4	5	8	0.158025	46 kDa
SRR8017_TRINITY_DN25942_c0_g2::SRR8017_TRINITY_DN25942_c0_g2_i2::g.119757::m.119757 [type:3prime_partial len:375 gc:universal SRR8017_TRINITY_DN25942_c0_g2_i2:216-1337(+)]	type:complete len:484 gc:universal SRR8020_TRINITY_DN24172_c0_g2_i1:1962-511(-)	SRR8020_TRINITY_DN24172_c0_g2::SRR8020_TRINITY_DN24172_c0_g2_i1::g.149713::m.149713	IS_216438_Aes_Skin_Mucus_lane_Pann_DB	1	0.00028487	7	7	8	0.194617	54 kDa
SRR8000_TRINITY_DN23260_c0_g1::SRR8000_TRINITY_DN23260_c0_g1_i1::g.101100::m.101100 [type:5prime_partial len:476 gc:universal SRR8000_TRINITY_DN23260_c0_g1_i1:2322-895(-)]	type:5prime_partial len:476 gc:universal SRR8000_TRINITY_DN23260_c0_g1_i1:2322-895(-)	SRR8000_TRINITY_DN23260_c0_g1::SRR8000_TRINITY_DN23260_c0_g1_i1::g.101100::m.101100	IS_216438_Aes_Skin_Mucus_lane_Pann_DB	1	0.00199409	2	3	56	0.498947	53 kDa
SRR7978_TRINITY_DN19409_c0_g2::SRR7978_TRINITY_DN19409_c0_g2_i2::g.44681::m.44681 [type:complete len:465 gc:universal SRR7978_TRINITY_DN19409_c0_g2_i2:370-1764(+)]	type:3prime_partial len:489 gc:universal SRR1330_TRINITY_DN119532_c19_g3_i3:214-1677(+)	SRR1330_TRINITY_DN119532_c19_g3::SRR1330_TRINITY_DN119532_c19_g3_i3::g.208416::m.208416	IS_216438_Aes_Skin_Mucus_lane_Pann_DB	1	0.00124631	2	2	35	0.497951	54 kDa
SRR7914_TRINITY_DN25684_c0_g1::SRR7914_TRINITY_DN25684_c0_g1_i1::g.9133::m.9133 [type:complete len:119 gc:universal SRR7914_TRINITY_DN25684_c0_g1_i1:3176-2820(-)]	type:5prime_partial len:127 gc:universal SRR1329_TRINITY_DN354501_c1_g1_i3:2-382(+)	SRR1329_TRINITY_DN354501_c1_g1::SRR1329_TRINITY_DN354501_c1_g1_i3::g.194102::m.194102	IS_216438_Aes_Skin_Mucus_lane_Pann_DB	1	7.12175e-05	2	2	2	0.238095	14 kDa
SRR7980_TRINITY_DN16520_c1_g5::SRR7980_TRINITY_DN16520_c1_g5_i1::g.87754::m.87754 [type:complete len:419 gc:universal SRR7980_TRINITY_DN16520_c1_g5_i1:123-1379(+)]	type:complete len:419 gc:universal SRR7980_TRINITY_DN16520_c1_g5_i1:123-1379(+)	SRR7980_TRINITY_DN16520_c1_g5::SRR7980_TRINITY_DN16520_c1_g5_i1::g.87754::m.87754	IS_216438_Aes_Skin_Mucus_lane_Pann_DB	1	0.000106826	2	2	3	0.0909091	47 kDa
SRR7978_TRINITY_DN16587_c0_g1::SRR7978_TRINITY_DN16587_c0_g1_i1::g.39985::m.39985 [type:complete len:217 gc:universal SRR7978_TRINITY_DN16587_c0_g1_i1:1647-2297(+)]	type:complete len:217 gc:universal SRR7978_TRINITY_DN16587_c0_g1_i1:1647-2297(+)	SRR7978_TRINITY_DN16587_c0_g1::SRR7978_TRINITY_DN16587_c0_g1_i1::g.39985::m.39985	IS_216438_Aes_Skin_Mucus_lane_Pann_DB	1	0.000106826	3	3	3	0.175926	24 kDa
SRR7979_TRINITY_DN19443_c0_g1::SRR7979_TRINITY_DN19443_c0_g1_i1::g.69052::m.69052 [type:complete len:241 gc:universal SRR7979_TRINITY_DN19443_c0_g1_i1:235-957(+)]	type:complete len:241 gc:universal SRR7979_TRINITY_DN19443_c0_g1_i1:235-957(+)	SRR7979_TRINITY_DN19443_c0_g1::SRR7979_TRINITY_DN19443_c0_g1_i1::g.69052::m.69052	IS_216438_Aes_Skin_Mucus_lane_Pann_DB	1	0.000142435	3	3	4	0.141667	27 kDa
SRR7978_TRINITY_DN19508_c0_g1::SRR7978_TRINITY_DN19508_c0_g1_i2::g.42550::m.42550 [type:complete len:142 gc:universal SRR7978_TRINITY_DN19508_c0_g1_i2:1611-2036(+)]	type:complete len:142 gc:universal SRR7978_TRINITY_DN19508_c0_g1_i2:1611-2036(+)	SRR7978_TRINITY_DN19508_c0_g1::SRR7978_TRINITY_DN19508_c0_g1_i2::g.42550::m.42550	IS_216438_Aes_Skin_Mucus_lane_Pann_DB	1	7.12175e-05	2	2	2	0.198582	16 kDa
SRR8017_TRINITY_DN24880_c6_g3::SRR8017_TRINITY_DN24880_c6_g3_i1::g.106041::m.106041 [type:complete len:614 gc:universal SRR8017_TRINITY_DN24880_c6_g3_i1:3450-1609(-)]	type:complete len:614 gc:universal SRR8017_TRINITY_DN24880_c6_g3_i1:3450-1609(-)	SRR8017_TRINITY_DN24880_c6_g3::SRR8017_TRINITY_DN24880_c6_g3_i1::g.106041::m.106041	IS_216438_Aes_Skin_Mucus_lane_Pann_DB	1	7.12175e-05	2	2	2	0.045677	69 kDa
SRR8021_TRINITY_DN18304_c0_g1::SRR8021_TRINITY_DN18304_c0_g1_i2::g.151311::m.151311 [type:complete len:180 gc:universal SRR8021_TRINITY_DN18304_c0_g1_i2:153-692(+)]	type:complete len:104 gc:universal SRR1330_TRINITY_DN115807_c10_g1_i1:659-348(-)	SRR1330_TRINITY_DN115807_c10_g1::SRR1330_TRINITY_DN115807_c10_g1_i1::g.241341::m.241341	IS_216438_Aes_Skin_Mucus_lane_Pann_DB	1	0.000106826	1	2	3	0.213592	12 kDa
SRR1329_TRINITY_DN352348_c0_g1::SRR1329_TRINITY_DN352348_c0_g1_i6::g.199724::m.199724 [type:3prime_partial len:241 gc:universal SRR1329_TRINITY_DN352348_c0_g1_i6:160-879(+)]	type:complete len:199 gc:universal SRR1330_TRINITY_DN37589_c0_g1_i1:125-721(+)	SRR1330_TRINITY_DN37589_c0_g1::SRR1330_TRINITY_DN37589_c0_g1_i1::g.258629::m.258629	IS_216438_Aes_Skin_Mucus_lane_Pann_DB	1	0.000249261	1	1	7	0.217172	23 kDa
SRR7978_TRINITY_DN16361_c0_g1::SRR7978_TRINITY_DN16361_c0_g1_i2::g.26052::m.26052 [type:complete len:613 gc:universal SRR7978_TRINITY_DN16361_c0_g1_i2:653-2491(+)]	type:complete len:335 gc:universal SRR8017_TRINITY_DN25565_c3_g1_i4:4188-5192(+)	SRR8017_TRINITY_DN25565_c3_g1::SRR8017_TRINITY_DN25565_c3_g1_i4::g.103912::m.103912	IS_216438_Aes_Skin_Mucus_lane_Pann_DB	1	0.000142435	2	3	4	0.134731	37 kDa
SRR7978_TRINITY_DN16478_c0_g1::SRR7978_TRINITY_DN16478_c0_g1_i3::g.44537::m.44537 [type:complete len:262 gc:universal SRR7978_TRINITY_DN16478_c0_g1_i3:527-1312(+)]	type:complete len:262 gc:universal SRR7978_TRINITY_DN16478_c0_g1_i3:527-1312(+)	SRR7978_TRINITY_DN16478_c0_g1::SRR7978_TRINITY_DN16478_c0_g1_i3::g.44537::m.44537	IS_216438_Aes_Skin_Mucus_lane_Pann_DB	1	0.000106826	3	3	3	0.195402	29 kDa
SRR7979_TRINITY_DN17879_c1_g6::SRR7979_TRINITY_DN17879_c1_g6_i2::g.48949::m.48949 [type:complete len:238 gc:universal SRR7979_TRINITY_DN17879_c1_g6_i2:168-881(+)]	type:5prime_partial len:121 gc:universal SRR1329_TRINITY_DN349828_c0_g1_i9:1-363(+)	SRR1329_TRINITY_DN349828_c0_g1::SRR1329_TRINITY_DN349828_c0_g1_i9::g.176249::m.176249	IS_216438_Aes_Skin_Mucus_lane_Pann_DB	1	0.000178044	2	3	5	0.283333	13 kDa
SRR8000_TRINITY_DN43568_c0_g1::SRR8000_TRINITY_DN43568_c0_g1_i1::g.100504::m.100504 [type:complete len:169 gc:universal SRR8000_TRINITY_DN43568_c0_g1_i1:1539-1033(-)]	type:complete len:169 gc:universal SRR8000_TRINITY_DN43568_c0_g1_i1:1539-1033(-)	SRR8000_TRINITY_DN43568_c0_g1::SRR8000_TRINITY_DN43568_c0_g1_i1::g.100504::m.100504	IS_216438_Aes_Skin_Mucus_lane_Pann_DB	1	0.000142435	3	3	4	0.309524	20 kDa
SRR1329_TRINITY_DN345260_c3_g1::SRR1329_TRINITY_DN345260_c3_g1_i1::g.188453::m.188453 [type:5prime_partial len:227 gc:universal SRR1329_TRINITY_DN345260_c3_g1_i1:3-683(+)]	type:5prime_partial len:227 gc:universal SRR1329_TRINITY_DN345260_c3_g1_i1:3-683(+)	SRR1329_TRINITY_DN345260_c3_g1::SRR1329_TRINITY_DN345260_c3_g1_i1::g.188453::m.188453	IS_216438_Aes_Skin_Mucus_lane_Pann_DB	1	0.000106826	1	1	3	0.19469	26 kDa
SRR7914_TRINITY_DN30956_c4_g1::SRR7914_TRINITY_DN30956_c4_g1_i5::g.6804::m.6804 [type:complete len:177 gc:universal SRR7914_TRINITY_DN30956_c4_g1_i5:583-1113(+)]	type:complete len:214 gc:universal SRR1329_TRINITY_DN353865_c1_g1_i2:714-73(-)	SRR1329_TRINITY_DN353865_c1_g1::SRR1329_TRINITY_DN353865_c1_g1_i2::g.167376::m.167376	IS_216438_Aes_Skin_Mucus_lane_Pann_DB	1	0.000106826	3	3	3	0.173709	25 kDa
SRR7978_TRINITY_DN16682_c0_g1::SRR7978_TRINITY_DN16682_c0_g1_i1::g.25881::m.25881 [type:complete len:275 gc:universal SRR7978_TRINITY_DN16682_c0_g1_i1:37-861(+)]	type:complete len:277 gc:universal SRR8020_TRINITY_DN25803_c0_g1_i1:1187-357(-)	SRR8020_TRINITY_DN25803_c0_g1::SRR8020_TRINITY_DN25803_c0_g1_i1::g.131708::m.131708	IS_216438_Aes_Skin_Mucus_lane_Pann_DB	1	0.000142435	3	3	4	0.119565	30 kDa
SRR7914_TRINITY_DN30135_c2_g1::SRR7914_TRINITY_DN30135_c2_g1_i1::g.1687::m.1687 [type:3prime_partial len:196 gc:universal SRR7914_TRINITY_DN30135_c2_g1_i1:352-936(+)]	type:complete len:713 gc:universal SRR8017_TRINITY_DN24811_c5_g7_i1:348-2486(+)	SRR8017_TRINITY_DN24811_c5_g7::SRR8017_TRINITY_DN24811_c5_g7_i1::g.106006::m.106006	IS_216438_Aes_Skin_Mucus_lane_Pann_DB	1	0.000142435	3	3	4	0.0547753	76 kDa
SRR7978_TRINITY_DN14758_c0_g1::SRR7978_TRINITY_DN14758_c0_g1_i5::g.29172::m.29172 [type:complete len:258 gc:universal SRR7978_TRINITY_DN14758_c0_g1_i5:846-1619(+)]	type:complete len:258 gc:universal SRR7978_TRINITY_DN14758_c0_g1_i5:846-1619(+)	SRR7978_TRINITY_DN14758_c0_g1::SRR7978_TRINITY_DN14758_c0_g1_i5::g.29172::m.29172	IS_216438_Aes_Skin_Mucus_lane_Pann_DB	1	0.000178044	4	4	5	0.210117	30 kDa
SRR8017_TRINITY_DN26790_c1_g1::SRR8017_TRINITY_DN26790_c1_g1_i1::g.112114::m.112114 [type:complete len:118 gc:universal SRR8017_TRINITY_DN26790_c1_g1_i1:781-428(-)]	type:complete len:118 gc:universal SRR7979_TRINITY_DN18279_c5_g7_i1:617-264(-)	SRR7979_TRINITY_DN18279_c5_g7::SRR7979_TRINITY_DN18279_c5_g7_i1::g.61801::m.61801	IS_216438_Aes_Skin_Mucus_lane_Pann_DB	1	0.000106826	3	3	3	0.42735	13 kDa
SRR8017_TRINITY_DN50009_c0_g1::SRR8017_TRINITY_DN50009_c0_g1_i1::g.102934::m.102934 [type:complete len:149 gc:universal SRR8017_TRINITY_DN50009_c0_g1_i1:85-531(+)]	type:complete len:149 gc:universal SRR8017_TRINITY_DN50009_c0_g1_i1:85-531(+)	SRR8017_TRINITY_DN50009_c0_g1::SRR8017_TRINITY_DN50009_c0_g1_i1::g.102934::m.102934	IS_216438_Aes_Skin_Mucus_lane_Pann_DB	1	0.000178044	2	2	5	0.168919	17 kDa
SRR7978_TRINITY_DN18678_c0_g2::SRR7978_TRINITY_DN18678_c0_g2_i1::g.32157::m.32157 [type:complete len:280 gc:universal SRR7978_TRINITY_DN18678_c0_g2_i1:1686-847(-)]	type:complete len:280 gc:universal SRR7978_TRINITY_DN18678_c0_g2_i1:1686-847(-)	SRR7978_TRINITY_DN18678_c0_g2::SRR7978_TRINITY_DN18678_c0_g2_i1::g.32157::m.32157	IS_216438_Aes_Skin_Mucus_lane_Pann_DB	0.99	7.12175e-05	2	2	2	0.0752688	31 kDa
SRR7978_TRINITY_DN15271_c0_g1::SRR7978_TRINITY_DN15271_c0_g1_i3::g.26014::m.26014 [type:complete len:147 gc:universal SRR7978_TRINITY_DN15271_c0_g1_i3:127-567(+)]	type:complete len:161 gc:universal SRR1329_TRINITY_DN342158_c0_g1_i18:76-558(+)	SRR1329_TRINITY_DN342158_c0_g1::SRR1329_TRINITY_DN342158_c0_g1_i18::g.192395::m.192395	IS_216438_Aes_Skin_Mucus_lane_Pann_DB	1	0.000178044	4	4	5	0.25	18 kDa
SRR7978_TRINITY_DN19253_c2_g2::SRR7978_TRINITY_DN19253_c2_g2_i2::g.30879::m.30879 [type:5prime_partial len:255 gc:universal SRR7978_TRINITY_DN19253_c2_g2_i2:2-766(+)]	type:5prime_partial len:255 gc:universal SRR7978_TRINITY_DN19253_c2_g2_i2:2-766(+)	SRR7978_TRINITY_DN19253_c2_g2::SRR7978_TRINITY_DN19253_c2_g2_i2::g.30879::m.30879	IS_216438_Aes_Skin_Mucus_lane_Pann_DB	1	0.000249261	4	5	7	0.212598	28 kDa
SRR7979_TRINITY_DN18372_c0_g6::SRR7979_TRINITY_DN18372_c0_g6_i2::g.47642::m.47642 [type:complete len:150 gc:universal SRR7979_TRINITY_DN18372_c0_g6_i2:520-969(+)]	type:complete len:150 gc:universal SRR7980_TRINITY_DN18021_c1_g4_i1:312-761(+)	SRR7980_TRINITY_DN18021_c1_g4::SRR7980_TRINITY_DN18021_c1_g4_i1::g.92459::m.92459	IS_216438_Aes_Skin_Mucus_lane_Pann_DB	1	0.000249261	3	4	7	0.369127	17 kDa
SRR1330_TRINITY_DN123871_c0_g5::SRR1330_TRINITY_DN123871_c0_g5_i2::g.209378::m.209378 [type:complete len:377 gc:universal SRR1330_TRINITY_DN123871_c0_g5_i2:1904-774(-)]	type:complete len:377 gc:universal SRR1330_TRINITY_DN123871_c0_g5_i2:1904-774(-)	SRR1330_TRINITY_DN123871_c0_g5::SRR1330_TRINITY_DN123871_c0_g5_i2::g.209378::m.209378	IS_216438_Aes_Skin_Mucus_lane_Pann_DB	1	0.00705053	1	1	198	0.62766	42 kDa
SRR1330_TRINITY_DN123871_c0_g5::SRR1330_TRINITY_DN123871_c0_g5_i2::g.209378::m.209378 [type:complete len:377 gc:universal SRR1330_TRINITY_DN123871_c0_g5_i2:1904-774(-)]	type:internal len:128 gc:universal SRR7914_TRINITY_DN52918_c0_g1_i1:2-382(+)	SRR7914_TRINITY_DN52918_c0_g1::SRR7914_TRINITY_DN52918_c0_g1_i1::g.12952::m.12952	IS_216438_Aes_Skin_Mucus_lane_Pann_DB	1	0.00113948	1	2	32	0.614173	14 kDa
SRR8017_TRINITY_DN36970_c0_g1::SRR8017_TRINITY_DN36970_c0_g1_i1::g.116481::m.116481 [type:internal len:140 gc:universal SRR8017_TRINITY_DN36970_c0_g1_i1:3-419(+)]	type:internal len:156 gc:universal SRR8020_TRINITY_DN11352_c0_g1_i1:466-2(-)	SRR8020_TRINITY_DN11352_c0_g1::SRR8020_TRINITY_DN11352_c0_g1_i1::g.138053::m.138053	IS_216438_Aes_Skin_Mucus_lane_Pann_DB	1	0.000249261	1	1	7	0.303226	15 kDa
SRR7979_TRINITY_DN16316_c1_g1::SRR7979_TRINITY_DN16316_c1_g1_i2::g.46558::m.46558 [type:complete len:372 gc:universal SRR7979_TRINITY_DN16316_c1_g1_i2:2357-1242(-)]	type:3prime_partial len:411 gc:universal SRR1329_TRINITY_DN335808_c6_g1_i1:120-1349(+)	SRR1329_TRINITY_DN335808_c6_g1::SRR1329_TRINITY_DN335808_c6_g1_i1::g.184410::m.184410	IS_216438_Aes_Skin_Mucus_lane_Pann_DB	1	7.12175e-05	2	2	2	0.0341463	45 kDa
SRR7978_TRINITY_DN16982_c0_g1::SRR7978_TRINITY_DN16982_c0_g1_i3::g.38872::m.38872 [type:complete len:1332 gc:universal SRR7978_TRINITY_DN16982_c0_g1_i3:4430-435(-)]	type:complete len:1332 gc:universal SRR7978_TRINITY_DN16982_c0_g1_i3:4430-435(-)	SRR7978_TRINITY_DN16982_c0_g1::SRR7978_TRINITY_DN16982_c0_g1_i3::g.38872::m.38872	IS_216438_Aes_Skin_Mucus_lane_Pann_DB	1	0.000106826	3	3	3	0.0300526	154 kDa
SRR8017_TRINITY_DN26541_c1_g5::SRR8017_TRINITY_DN26541_c1_g5_i1::g.116836::m.116836 [type:5prime_partial len:317 gc:universal SRR8017_TRINITY_DN26541_c1_g5_i1:1-951(+)]	type:5prime_partial len:309 gc:universal SRR1329_TRINITY_DN352477_c9_g2_i6:1285-359(-)	SRR1329_TRINITY_DN352477_c9_g2::SRR1329_TRINITY_DN352477_c9_g2_i6::g.180072::m.180072	IS_216438_Aes_Skin_Mucus_lane_Pann_DB	1	0.000106826	3	3	3	0.142857	33 kDa
SRR7979_TRINITY_DN16569_c0_g1::SRR7979_TRINITY_DN16569_c0_g1_i1::g.63599::m.63599 [type:complete len:486 gc:universal SRR7979_TRINITY_DN16569_c0_g1_i1:2497-1040(-)]	type:complete len:486 gc:universal SRR7979_TRINITY_DN16569_c0_g1_i1:2497-1040(-)	SRR7979_TRINITY_DN16569_c0_g1::SRR7979_TRINITY_DN16569_c0_g1_i1::g.63599::m.63599	IS_216438_Aes_Skin_Mucus_lane_Pann_DB	1	7.12175e-05	2	2	2	0.0804124	53 kDa
SRR1329_TRINITY_DN350332_c1_g1::SRR1329_TRINITY_DN350332_c1_g1_i9::g.166822::m.166822 [type:internal len:145 gc:universal SRR1329_TRINITY_DN350332_c1_g1_i9:433-2(-)]	type:5prime_partial len:272 gc:universal SRR1329_TRINITY_DN350332_c1_g1_i2:1443-628(-)	SRR1329_TRINITY_DN350332_c1_g1::SRR1329_TRINITY_DN350332_c1_g1_i2::g.166818::m.166818	IS_216438_Aes_Skin_Mucus_lane_Pann_DB	1	0.000106826	2	2	3	0.180812	31 kDa
SRR7979_TRINITY_DN18003_c5_g2::SRR7979_TRINITY_DN18003_c5_g2_i1::g.68365::m.68365 [type:complete len:208 gc:universal SRR7979_TRINITY_DN18003_c5_g2_i1:783-1406(+)]	type:complete len:207 gc:universal SRR7978_TRINITY_DN15164_c0_g1_i2:354-974(+)	SRR7978_TRINITY_DN15164_c0_g1::SRR7978_TRINITY_DN15164_c0_g1_i2::g.37529::m.37529	IS_216438_Aes_Skin_Mucus_lane_Pann_DB	1	0.000106826	3	3	3	0.23301	23 kDa
SRR7914_TRINITY_DN30843_c6_g1::SRR7914_TRINITY_DN30843_c6_g1_i2::g.23290::m.23290 [type:complete len:206 gc:universal SRR7914_TRINITY_DN30843_c6_g1_i2:199-816(+)]	type:complete len:195 gc:universal SRR1330_TRINITY_DN36386_c0_g1_i2:191-775(+)	SRR1330_TRINITY_DN36386_c0_g1::SRR1330_TRINITY_DN36386_c0_g1_i2::g.262775::m.262775	IS_216438_Aes_Skin_Mucus_lane_Pann_DB	1	0.000142435	2	3	4	0.175258	22 kDa
SRR7978_TRINITY_DN18640_c2_g1::SRR7978_TRINITY_DN18640_c2_g1_i3::g.32015::m.32015 [type:complete len:127 gc:universal SRR7978_TRINITY_DN18640_c2_g1_i3:236-616(+)]	type:complete len:127 gc:universal SRR7978_TRINITY_DN18640_c2_g1_i3:236-616(+)	SRR7978_TRINITY_DN18640_c2_g1::SRR7978_TRINITY_DN18640_c2_g1_i3::g.32015::m.32015	IS_216438_Aes_Skin_Mucus_lane_Pann_DB	1	0.000106826	2	2	3	0.246032	14 kDa
SRR7979_TRINITY_DN18094_c5_g2::SRR7979_TRINITY_DN18094_c5_g2_i3::g.68575::m.68575 [type:complete len:212 gc:universal SRR7979_TRINITY_DN18094_c5_g2_i3:96-731(+)]	type:complete len:167 gc:universal SRR7914_TRINITY_DN30530_c5_g1_i2:3342-2842(-)	SRR7914_TRINITY_DN30530_c5_g1::SRR7914_TRINITY_DN30530_c5_g1_i2::g.19859::m.19859	IS_216438_Aes_Skin_Mucus_lane_Pann_DB	1	0.000106826	1	1	3	0.138554	19 kDa
SRR8020_TRINITY_DN24831_c0_g1::SRR8020_TRINITY_DN24831_c0_g1_i1::g.130490::m.130490 [type:complete len:309 gc:universal SRR8020_TRINITY_DN24831_c0_g1_i1:645-1571(+)]	type:3prime_partial len:190 gc:universal SRR1329_TRINITY_DN351375_c0_g2_i1:569-3(-)	SRR1329_TRINITY_DN351375_c0_g2::SRR1329_TRINITY_DN351375_c0_g2_i1::g.174505::m.174505	IS_216438_Aes_Skin_Mucus_lane_Pann_DB	1	0.000106826	2	3	3	0.148148	21 kDa
SRR7914_TRINITY_DN31131_c5_g1::SRR7914_TRINITY_DN31131_c5_g1_i2::g.16232::m.16232 [type:complete len:450 gc:universal SRR7914_TRINITY_DN31131_c5_g1_i2:558-1907(+)]	type:complete len:766 gc:universal SRR7914_TRINITY_DN31131_c5_g1_i19:387-2684(+)	SRR7914_TRINITY_DN31131_c5_g1::SRR7914_TRINITY_DN31131_c5_g1_i19::g.16247::m.16247	IS_216438_Aes_Skin_Mucus_lane_Pann_DB	1	0.000106826	3	3	3	0.0522876	85 kDa
SRR8020_TRINITY_DN25950_c1_g1::SRR8020_TRINITY_DN25950_c1_g1_i5::g.147924::m.147924 [type:5prime_partial len:138 gc:universal SRR8020_TRINITY_DN25950_c1_g1_i5:1093-680(-)]	type:5prime_partial len:138 gc:universal SRR8020_TRINITY_DN25950_c1_g1_i5:1093-680(-)	SRR8020_TRINITY_DN25950_c1_g1::SRR8020_TRINITY_DN25950_c1_g1_i5::g.147924::m.147924	IS_216438_Aes_Skin_Mucus_lane_Pann_DB	1	0.000106826	2	2	3	0.226277	16 kDa
SRR8017_TRINITY_DN19673_c0_g1::SRR8017_TRINITY_DN19673_c0_g1_i1::g.108294::m.108294 [type:complete len:533 gc:universal SRR8017_TRINITY_DN19673_c0_g1_i1:4011-5609(+)]	type:complete len:533 gc:universal SRR8017_TRINITY_DN19673_c0_g1_i1:4011-5609(+)	SRR8017_TRINITY_DN19673_c0_g1::SRR8017_TRINITY_DN19673_c0_g1_i1::g.108294::m.108294	IS_216438_Aes_Skin_Mucus_lane_Pann_DB	1	0.000106826	3	3	3	0.0883459	58 kDa
SRR7978_TRINITY_DN19824_c4_g1::SRR7978_TRINITY_DN19824_c4_g1_i2::g.36860::m.36860 [type:complete len:570 gc:universal SRR7978_TRINITY_DN19824_c4_g1_i2:1989-280(-)]	type:complete len:570 gc:universal SRR7978_TRINITY_DN19824_c4_g1_i2:1989-280(-)	SRR7978_TRINITY_DN19824_c4_g1::SRR7978_TRINITY_DN19824_c4_g1_i2::g.36860::m.36860	IS_216438_Aes_Skin_Mucus_lane_Pann_DB	1	0.000106826	2	2	3	0.0474517	60 kDa
SRR1330_TRINITY_DN125040_c2_g1::SRR1330_TRINITY_DN125040_c2_g1_i2::g.250047::m.250047 [type:internal len:162 gc:universal SRR1330_TRINITY_DN125040_c2_g1_i2:3-485(+)]	type:internal len:162 gc:universal SRR1330_TRINITY_DN125040_c2_g1_i2:3-485(+)	SRR1330_TRINITY_DN125040_c2_g1::SRR1330_TRINITY_DN125040_c2_g1_i2::g.250047::m.250047	IS_216438_Aes_Skin_Mucus_lane_Pann_DB	1	0.000106826	3	3	3	0.223602	17 kDa
SRR7979_TRINITY_DN17616_c0_g2::SRR7979_TRINITY_DN17616_c0_g2_i1::g.64662::m.64662 [type:complete len:149 gc:universal SRR7979_TRINITY_DN17616_c0_g2_i1:2331-2777(+)]	type:complete len:193 gc:universal SRR8017_TRINITY_DN27019_c0_g2_i2:257-835(+)	SRR8017_TRINITY_DN27019_c0_g2::SRR8017_TRINITY_DN27019_c0_g2_i2::g.117590::m.117590	IS_216438_Aes_Skin_Mucus_lane_Pann_DB	1	0.000213652	3	3	6	0.229167	21 kDa
SRR8000_TRINITY_DN15304_c0_g1::SRR8000_TRINITY_DN15304_c0_g1_i2::g.99026::m.99026 [type:complete len:225 gc:universal SRR8000_TRINITY_DN15304_c0_g1_i2:529-1203(+)]	type:5prime_partial len:232 gc:universal SRR1329_TRINITY_DN348520_c0_g1_i10:1-696(+)	SRR1329_TRINITY_DN348520_c0_g1::SRR1329_TRINITY_DN348520_c0_g1_i10::g.194539::m.194539	IS_216438_Aes_Skin_Mucus_lane_Pann_DB	1	0.000142435	3	3	4	0.142857	25 kDa
SRR7978_TRINITY_DN14502_c0_g1::SRR7978_TRINITY_DN14502_c0_g1_i1::g.26242::m.26242 [type:complete len:2478 gc:universal SRR7978_TRINITY_DN14502_c0_g1_i1:7623-190(-)]	type:complete len:2478 gc:universal SRR7978_TRINITY_DN14502_c0_g1_i1:7623-190(-)	SRR7978_TRINITY_DN14502_c0_g1::SRR7978_TRINITY_DN14502_c0_g1_i1::g.26242::m.26242	IS_216438_Aes_Skin_Mucus_lane_Pann_DB	1	0.000142435	2	3	4	0.0161486	286 kDa
SRR7914_TRINITY_DN30187_c2_g2::SRR7914_TRINITY_DN30187_c2_g2_i13::g.1439::m.1439 [type:complete len:491 gc:universal SRR7914_TRINITY_DN30187_c2_g2_i13:192-1664(+)]	type:complete len:512 gc:universal SRR1329_TRINITY_DN348357_c0_g1_i5:1626-91(-)	SRR1329_TRINITY_DN348357_c0_g1::SRR1329_TRINITY_DN348357_c0_g1_i5::g.201161::m.201161	IS_216438_Aes_Skin_Mucus_lane_Pann_DB	1	0.000142435	4	4	4	0.119374	59 kDa
SRR7914_TRINITY_DN30378_c5_g1::SRR7914_TRINITY_DN30378_c5_g1_i2::g.7571::m.7571 [type:complete len:515 gc:universal SRR7914_TRINITY_DN30378_c5_g1_i2:4315-2771(-)]	type:complete len:515 gc:universal SRR7914_TRINITY_DN30378_c5_g1_i2:4315-2771(-)	SRR7914_TRINITY_DN30378_c5_g1::SRR7914_TRINITY_DN30378_c5_g1_i2::g.7571::m.7571	IS_216438_Aes_Skin_Mucus_lane_Pann_DB	1	0.000213652	3	3	6	0.07393	59 kDa
SRR7978_TRINITY_DN18509_c4_g2::SRR7978_TRINITY_DN18509_c4_g2_i1::g.37325::m.37325 [type:complete len:116 gc:universal SRR7978_TRINITY_DN18509_c4_g2_i1:123-470(+)]	type:complete len:116 gc:universal SRR7978_TRINITY_DN18509_c4_g2_i1:123-470(+)	SRR7978_TRINITY_DN18509_c4_g2::SRR7978_TRINITY_DN18509_c4_g2_i1::g.37325::m.37325	IS_216438_Aes_Skin_Mucus_lane_Pann_DB	1	0.000213652	3	3	6	0.46087	12 kDa
SRR8017_TRINITY_DN26520_c0_g1::SRR8017_TRINITY_DN26520_c0_g1_i1::g.116977::m.116977 [type:3prime_partial len:263 gc:universal SRR8017_TRINITY_DN26520_c0_g1_i1:786-1(-)]	type:complete len:277 gc:universal SRR7980_TRINITY_DN19327_c5_g3_i1:215-1045(+)	SRR7980_TRINITY_DN19327_c5_g3::SRR7980_TRINITY_DN19327_c5_g3_i1::g.88129::m.88129	IS_216438_Aes_Skin_Mucus_lane_Pann_DB	1	0.000961436	3	4	27	0.663044	31 kDa
SRR7979_TRINITY_DN17648_c1_g2::SRR7979_TRINITY_DN17648_c1_g2_i2::g.64434::m.64434 [type:complete len:137 gc:universal SRR7979_TRINITY_DN17648_c1_g2_i2:486-896(+)]	type:5prime_partial len:147 gc:universal SRR7978_TRINITY_DN19227_c1_g1_i5:3-443(+)	SRR7978_TRINITY_DN19227_c1_g1::SRR7978_TRINITY_DN19227_c1_g1_i5::g.30399::m.30399	IS_216438_Aes_Skin_Mucus_lane_Pann_DB	1	0.00135313	2	3	38	0.534247	16 kDa
SRR7980_TRINITY_DN4512_c0_g1::SRR7980_TRINITY_DN4512_c0_g1_i1::g.79882::m.79882 [type:complete len:194 gc:universal SRR7980_TRINITY_DN4512_c0_g1_i1:284-865(+)]	type:5prime_partial len:190 gc:universal SRR1329_TRINITY_DN325524_c0_g1_i2:2-571(+)	SRR1329_TRINITY_DN325524_c0_g1::SRR1329_TRINITY_DN325524_c0_g1_i2::g.170699::m.170699	IS_216438_Aes_Skin_Mucus_lane_Pann_DB	1	0.000142435	2	3	4	0.169312	20 kDa
SRR8017_TRINITY_DN26151_c5_g1::SRR8017_TRINITY_DN26151_c5_g1_i11::g.120728::m.120728 [type:complete len:156 gc:universal SRR8017_TRINITY_DN26151_c5_g1_i11:520-53(-)]	type:complete len:156 gc:universal SRR8017_TRINITY_DN26151_c5_g1_i11:520-53(-)	SRR8017_TRINITY_DN26151_c5_g1::SRR8017_TRINITY_DN26151_c5_g1_i11::g.120728::m.120728	IS_216438_Aes_Skin_Mucus_lane_Pann_DB	1	0.000106826	2	2	3	0.154839	18 kDa
SRR7978_TRINITY_DN19409_c0_g2::SRR7978_TRINITY_DN19409_c0_g2_i2::g.44681::m.44681 [type:complete len:465 gc:universal SRR7978_TRINITY_DN19409_c0_g2_i2:370-1764(+)]	type:complete len:466 gc:universal SRR7979_TRINITY_DN17557_c0_g1_i7:274-1671(+)	SRR7979_TRINITY_DN17557_c0_g1::SRR7979_TRINITY_DN17557_c0_g1_i7::g.50582::m.50582	IS_216438_Aes_Skin_Mucus_lane_Pann_DB	1	0.00113948	1	1	32	0.374194	51 kDa
SRR7980_TRINITY_DN33379_c0_g1::SRR7980_TRINITY_DN33379_c0_g1_i1::g.92886::m.92886 [type:5prime_partial len:519 gc:universal SRR7980_TRINITY_DN33379_c0_g1_i1:1-1557(+)]	type:complete len:479 gc:universal SRR8020_TRINITY_DN27743_c0_g1_i1:1789-353(-)	SRR8020_TRINITY_DN27743_c0_g1::SRR8020_TRINITY_DN27743_c0_g1_i1::g.130999::m.130999	IS_216438_Aes_Skin_Mucus_lane_Pann_DB	1	0.00028487	2	2	8	0.240586	53 kDa
SRR7979_TRINITY_DN15021_c0_g1::SRR7979_TRINITY_DN15021_c0_g1_i3::g.61405::m.61405 [type:complete len:2317 gc:universal SRR7979_TRINITY_DN15021_c0_g1_i3:171-7121(+)]	type:5prime_partial len:1311 gc:universal SRR7979_TRINITY_DN15021_c0_g1_i1:3-3935(+)	SRR7979_TRINITY_DN15021_c0_g1::SRR7979_TRINITY_DN15021_c0_g1_i1::g.61403::m.61403	IS_216438_Aes_Skin_Mucus_lane_Pann_DB	1	0.000498522	1	1	14	0.112214	149 kDa
SRR8017_TRINITY_DN26941_c1_g1::SRR8017_TRINITY_DN26941_c1_g1_i4::g.110048::m.110048 [type:complete len:465 gc:universal SRR8017_TRINITY_DN26941_c1_g1_i4:1740-346(-)]	type:complete len:465 gc:universal SRR1330_TRINITY_DN120498_c5_g1_i4:83-1477(+)	SRR1330_TRINITY_DN120498_c5_g1::SRR1330_TRINITY_DN120498_c5_g1_i4::g.255633::m.255633	IS_216438_Aes_Skin_Mucus_lane_Pann_DB	1	0.00131752	1	2	37	0.413793	54 kDa
SRR7978_TRINITY_DN17417_c0_g1::SRR7978_TRINITY_DN17417_c0_g1_i1::g.35179::m.35179 [type:complete len:330 gc:universal SRR7978_TRINITY_DN17417_c0_g1_i1:1801-812(-)]	type:complete len:330 gc:universal SRR7978_TRINITY_DN17417_c0_g1_i1:1801-812(-)	SRR7978_TRINITY_DN17417_c0_g1::SRR7978_TRINITY_DN17417_c0_g1_i1::g.35179::m.35179	IS_216438_Aes_Skin_Mucus_lane_Pann_DB	1	0.000106826	2	2	3	0.145897	35 kDa
SRR7914_TRINITY_DN30041_c1_g1::SRR7914_TRINITY_DN30041_c1_g1_i15::g.118::m.118 [type:complete len:249 gc:universal SRR7914_TRINITY_DN30041_c1_g1_i15:144-890(+)]	type:complete len:249 gc:universal SRR7979_TRINITY_DN16818_c1_g1_i7:2393-1647(-)	SRR7979_TRINITY_DN16818_c1_g1::SRR7979_TRINITY_DN16818_c1_g1_i7::g.55955::m.55955	IS_216438_Aes_Skin_Mucus_lane_Pann_DB	1	0.000605348	2	2	17	0.326613	29 kDa
SRR7980_TRINITY_DN18154_c0_g1::SRR7980_TRINITY_DN18154_c0_g1_i2::g.75273::m.75273 [type:complete len:395 gc:universal SRR7980_TRINITY_DN18154_c0_g1_i2:200-1384(+)]	type:complete len:395 gc:universal SRR7980_TRINITY_DN18154_c0_g1_i2:200-1384(+)	SRR7980_TRINITY_DN18154_c0_g1::SRR7980_TRINITY_DN18154_c0_g1_i2::g.75273::m.75273	IS_216438_Aes_Skin_Mucus_lane_Pann_DB	1	0.000356087	1	1	10	0.21066	45 kDa
SRR8020_TRINITY_DN29872_c4_g3::SRR8020_TRINITY_DN29872_c4_g3_i4::g.146531::m.146531 [type:complete len:283 gc:universal SRR8020_TRINITY_DN29872_c4_g3_i4:1146-298(-)]	type:complete len:283 gc:universal SRR8020_TRINITY_DN29872_c4_g3_i4:1146-298(-)	SRR8020_TRINITY_DN29872_c4_g3::SRR8020_TRINITY_DN29872_c4_g3_i4::g.146531::m.146531	IS_216438_Aes_Skin_Mucus_lane_Pann_DB	1	0.000106826	3	3	3	0.191489	32 kDa
SRR7980_TRINITY_DN35840_c0_g1::SRR7980_TRINITY_DN35840_c0_g1_i1::g.84916::m.84916 [type:internal len:125 gc:universal SRR7980_TRINITY_DN35840_c0_g1_i1:3-374(+)]	type:complete len:276 gc:universal SRR7914_TRINITY_DN30381_c6_g1_i4:62-889(+)	SRR7914_TRINITY_DN30381_c6_g1::SRR7914_TRINITY_DN30381_c6_g1_i4::g.7651::m.7651	IS_216438_Aes_Skin_Mucus_lane_Pann_DB	1	0.000106826	1	1	3	0.152727	29 kDa
SRR8017_TRINITY_DN23081_c0_g2::SRR8017_TRINITY_DN23081_c0_g2_i5::g.106868::m.106868 [type:complete len:362 gc:universal SRR8017_TRINITY_DN23081_c0_g2_i5:176-1261(+)]	type:5prime_partial len:404 gc:universal SRR1330_TRINITY_DN157839_c0_g1_i1:1259-48(-)	SRR1330_TRINITY_DN157839_c0_g1::SRR1330_TRINITY_DN157839_c0_g1_i1::g.255491::m.255491	IS_216438_Aes_Skin_Mucus_lane_Pann_DB	1	0.000178044	2	2	5	0.101737	44 kDa
SRR7979_TRINITY_DN17453_c5_g1::SRR7979_TRINITY_DN17453_c5_g1_i5::g.57810::m.57810 [type:complete len:506 gc:universal SRR7979_TRINITY_DN17453_c5_g1_i5:155-1672(+)]	type:5prime_partial len:238 gc:universal SRR1329_TRINITY_DN353039_c0_g2_i6:3-716(+)	SRR1329_TRINITY_DN353039_c0_g2::SRR1329_TRINITY_DN353039_c0_g2_i6::g.191034::m.191034	IS_216438_Aes_Skin_Mucus_lane_Pann_DB	1	0.000106826	2	2	3	0.092827	26 kDa
SRR7980_TRINITY_DN82_c0_g1::SRR7980_TRINITY_DN82_c0_g1_i2::g.80109::m.80109 [type:complete len:152 gc:universal SRR7980_TRINITY_DN82_c0_g1_i2:344-799(+)]	type:5prime_partial len:101 gc:universal SRR1329_TRINITY_DN345862_c0_g1_i9:386-84(-)	SRR1329_TRINITY_DN345862_c0_g1::SRR1329_TRINITY_DN345862_c0_g1_i9::g.170285::m.170285	IS_216438_Aes_Skin_Mucus_lane_Pann_DB	1	7.12175e-05	2	2	2	0.24	11 kDa
SRR8017_TRINITY_DN25098_c4_g4::SRR8017_TRINITY_DN25098_c4_g4_i3::g.121595::m.121595 [type:complete len:197 gc:universal SRR8017_TRINITY_DN25098_c4_g4_i3:665-75(-)]	type:complete len:200 gc:universal SRR7978_TRINITY_DN14084_c0_g1_i1:691-92(-)	SRR7978_TRINITY_DN14084_c0_g1::SRR7978_TRINITY_DN14084_c0_g1_i1::g.31206::m.31206	IS_216438_Aes_Skin_Mucus_lane_Pann_DB	0.99	7.12175e-05	2	2	2	0.115578	23 kDa
SRR8017_TRINITY_DN19666_c0_g2::SRR8017_TRINITY_DN19666_c0_g2_i1::g.108292::m.108292 [type:complete len:435 gc:universal SRR8017_TRINITY_DN19666_c0_g2_i1:334-1638(+)]	type:complete len:413 gc:universal SRR7980_TRINITY_DN18453_c3_g3_i3:6037-4799(-)	SRR7980_TRINITY_DN18453_c3_g3::SRR7980_TRINITY_DN18453_c3_g3_i3::g.82289::m.82289	IS_216438_Aes_Skin_Mucus_lane_Pann_DB	1	0.000142435	2	2	4	0.0752427	44 kDa
SRR7978_TRINITY_DN18640_c4_g1::SRR7978_TRINITY_DN18640_c4_g1_i1::g.32026::m.32026 [type:complete len:326 gc:universal SRR7978_TRINITY_DN18640_c4_g1_i1:242-1219(+)]	type:complete len:326 gc:universal SRR7978_TRINITY_DN18640_c4_g1_i1:242-1219(+)	SRR7978_TRINITY_DN18640_c4_g1::SRR7978_TRINITY_DN18640_c4_g1_i1::g.32026::m.32026	IS_216438_Aes_Skin_Mucus_lane_Pann_DB	1	0.000106826	2	2	3	0.0769231	36 kDa
SRR7978_TRINITY_DN16318_c0_g3::SRR7978_TRINITY_DN16318_c0_g3_i3::g.26193::m.26193 [type:complete len:168 gc:universal SRR7978_TRINITY_DN16318_c0_g3_i3:376-879(+)]	type:complete len:168 gc:universal SRR1329_TRINITY_DN353562_c2_g3_i8:76-579(+)	SRR1329_TRINITY_DN353562_c2_g3::SRR1329_TRINITY_DN353562_c2_g3_i8::g.182271::m.182271	IS_216438_Aes_Skin_Mucus_lane_Pann_DB	1	0.000142435	3	3	4	0.221557	19 kDa
SRR8017_TRINITY_DN25674_c9_g1::SRR8017_TRINITY_DN25674_c9_g1_i1::g.107865::m.107865 [type:complete len:526 gc:universal SRR8017_TRINITY_DN25674_c9_g1_i1:4098-2521(-)]	type:5prime_partial len:530 gc:universal SRR7978_TRINITY_DN19329_c0_g1_i5:2-1591(+)	SRR7978_TRINITY_DN19329_c0_g1::SRR7978_TRINITY_DN19329_c0_g1_i5::g.41019::m.41019	IS_216438_Aes_Skin_Mucus_lane_Pann_DB	1	0.000213652	2	3	6	0.0907372	60 kDa
SRR8020_TRINITY_DN30264_c0_g2::SRR8020_TRINITY_DN30264_c0_g2_i4::g.136686::m.136686 [type:complete len:564 gc:universal SRR8020_TRINITY_DN30264_c0_g2_i4:4180-2489(-)]	type:complete len:549 gc:universal SRR8017_TRINITY_DN27005_c2_g2_i3:3381-1735(-)	SRR8017_TRINITY_DN27005_c2_g2::SRR8017_TRINITY_DN27005_c2_g2_i3::g.117690::m.117690	IS_216438_Aes_Skin_Mucus_lane_Pann_DB	1	0.00028487	3	3	8	0.142336	61 kDa
SRR7914_TRINITY_DN31309_c3_g2::SRR7914_TRINITY_DN31309_c3_g2_i5::g.5755::m.5755 [type:complete len:322 gc:universal SRR7914_TRINITY_DN31309_c3_g2_i5:1504-539(-)]	type:internal len:234 gc:universal SRR1329_TRINITY_DN354854_c0_g1_i11:701-3(-)	SRR1329_TRINITY_DN354854_c0_g1::SRR1329_TRINITY_DN354854_c0_g1_i11::g.168946::m.168946	IS_216438_Aes_Skin_Mucus_lane_Pann_DB	1	0.000142435	2	2	4	0.103004	26 kDa
SRR8000_TRINITY_DN333_c0_g1::SRR8000_TRINITY_DN333_c0_g1_i1::g.99596::m.99596 [type:complete len:476 gc:universal SRR8000_TRINITY_DN333_c0_g1_i1:62-1489(+)]	type:complete len:476 gc:universal SRR8000_TRINITY_DN333_c0_g1_i1:62-1489(+)	SRR8000_TRINITY_DN333_c0_g1::SRR8000_TRINITY_DN333_c0_g1_i1::g.99596::m.99596	IS_216438_Aes_Skin_Mucus_lane_Pann_DB	1	0.000142435	3	3	4	0.109474	52 kDa
SRR7979_TRINITY_DN17779_c0_g1::SRR7979_TRINITY_DN17779_c0_g1_i2::g.63248::m.63248 [type:complete len:127 gc:universal SRR7979_TRINITY_DN17779_c0_g1_i2:1279-1659(+)]	type:complete len:127 gc:universal SRR7979_TRINITY_DN17779_c0_g1_i2:1279-1659(+)	SRR7979_TRINITY_DN17779_c0_g1::SRR7979_TRINITY_DN17779_c0_g1_i2::g.63248::m.63248	IS_216438_Aes_Skin_Mucus_lane_Pann_DB	1	0.000142435	2	2	4	0.269841	14 kDa
SRR7979_TRINITY_DN18255_c3_g1::SRR7979_TRINITY_DN18255_c3_g1_i1::g.61715::m.61715 [type:complete len:176 gc:universal SRR7979_TRINITY_DN18255_c3_g1_i1:264-791(+)]	type:complete len:176 gc:universal SRR7979_TRINITY_DN18255_c3_g1_i1:264-791(+)	SRR7979_TRINITY_DN18255_c3_g1::SRR7979_TRINITY_DN18255_c3_g1_i1::g.61715::m.61715	IS_216438_Aes_Skin_Mucus_lane_Pann_DB	1	0.000142435	3	3	4	0.274286	20 kDa
SRR8017_TRINITY_DN27102_c0_g1::SRR8017_TRINITY_DN27102_c0_g1_i1::g.115199::m.115199 [type:complete len:1175 gc:universal SRR8017_TRINITY_DN27102_c0_g1_i1:157-3681(+)]	type:complete len:1176 gc:universal SRR8020_TRINITY_DN28659_c0_g1_i1:4532-1005(-)	SRR8020_TRINITY_DN28659_c0_g1::SRR8020_TRINITY_DN28659_c0_g1_i1::g.137864::m.137864	IS_216438_Aes_Skin_Mucus_lane_Pann_DB	1	0.000142435	3	3	4	0.0348936	130 kDa
SRR7979_TRINITY_DN18380_c4_g2::SRR7979_TRINITY_DN18380_c4_g2_i1::g.47878::m.47878 [type:complete len:510 gc:universal SRR7979_TRINITY_DN18380_c4_g2_i1:2806-4335(+)]	type:complete len:474 gc:universal SRR7914_TRINITY_DN27808_c0_g1_i1:2509-1088(-)	SRR7914_TRINITY_DN27808_c0_g1::SRR7914_TRINITY_DN27808_c0_g1_i1::g.3628::m.3628	IS_216438_Aes_Skin_Mucus_lane_Pann_DB	1	0.000178044	4	4	5	0.112051	53 kDa
SRR7980_TRINITY_DN10171_c0_g1::SRR7980_TRINITY_DN10171_c0_g1_i2::g.86765::m.86765 [type:complete len:247 gc:universal SRR7980_TRINITY_DN10171_c0_g1_i2:179-919(+)]	type:complete len:247 gc:universal SRR7980_TRINITY_DN10171_c0_g1_i2:179-919(+)	SRR7980_TRINITY_DN10171_c0_g1::SRR7980_TRINITY_DN10171_c0_g1_i2::g.86765::m.86765	IS_216438_Aes_Skin_Mucus_lane_Pann_DB	1	0.000178044	4	4	5	0.178862	27 kDa
SRR1329_TRINITY_DN144513_c0_g1::SRR1329_TRINITY_DN144513_c0_g1_i1::g.163026::m.163026 [type:5prime_partial len:127 gc:universal SRR1329_TRINITY_DN144513_c0_g1_i1:2-382(+)]	type:5prime_partial len:127 gc:universal SRR1329_TRINITY_DN144513_c0_g1_i1:2-382(+)	SRR1329_TRINITY_DN144513_c0_g1::SRR1329_TRINITY_DN144513_c0_g1_i1::g.163026::m.163026	IS_216438_Aes_Skin_Mucus_lane_Pann_DB	1	0.000178044	2	3	5	0.277778	14 kDa
SRR8000_TRINITY_DN21986_c6_g1::SRR8000_TRINITY_DN21986_c6_g1_i7::g.98696::m.98696 [type:complete len:233 gc:universal SRR8000_TRINITY_DN21986_c6_g1_i7:307-1005(+)]	type:complete len:233 gc:universal SRR8000_TRINITY_DN21986_c6_g1_i7:307-1005(+)	SRR8000_TRINITY_DN21986_c6_g1::SRR8000_TRINITY_DN21986_c6_g1_i7::g.98696::m.98696	IS_216438_Aes_Skin_Mucus_lane_Pann_DB	1	0.000178044	4	4	5	0.306034	27 kDa
SRR8000_TRINITY_DN21790_c0_g1::SRR8000_TRINITY_DN21790_c0_g1_i2::g.94686::m.94686 [type:complete len:538 gc:universal SRR8000_TRINITY_DN21790_c0_g1_i2:261-1874(+)]	type:complete len:496 gc:universal SRR8021_TRINITY_DN21013_c6_g1_i1:2921-1434(-)	SRR8021_TRINITY_DN21013_c6_g1::SRR8021_TRINITY_DN21013_c6_g1_i1::g.153121::m.153121	IS_216438_Aes_Skin_Mucus_lane_Pann_DB	1	0.000178044	4	4	5	0.111111	57 kDa
SRR7980_TRINITY_DN16251_c0_g1::SRR7980_TRINITY_DN16251_c0_g1_i3::g.74382::m.74382 [type:complete len:679 gc:universal SRR7980_TRINITY_DN16251_c0_g1_i3:4604-2568(-)]	type:complete len:679 gc:universal SRR7980_TRINITY_DN16251_c0_g1_i3:4604-2568(-)	SRR7980_TRINITY_DN16251_c0_g1::SRR7980_TRINITY_DN16251_c0_g1_i3::g.74382::m.74382	IS_216438_Aes_Skin_Mucus_lane_Pann_DB	1	0.000178044	2	3	5	0.079646	76 kDa
SRR7980_TRINITY_DN19100_c3_g2::SRR7980_TRINITY_DN19100_c3_g2_i6::g.85196::m.85196 [type:internal len:125 gc:universal SRR7980_TRINITY_DN19100_c3_g2_i6:3-374(+)]	type:internal len:125 gc:universal SRR7980_TRINITY_DN19100_c3_g2_i6:3-374(+)	SRR7980_TRINITY_DN19100_c3_g2::SRR7980_TRINITY_DN19100_c3_g2_i6::g.85196::m.85196	IS_216438_Aes_Skin_Mucus_lane_Pann_DB	0.99	0.000178044	2	2	5	0.0725806	15 kDa
SRR7914_TRINITY_DN28680_c0_g1::SRR7914_TRINITY_DN28680_c0_g1_i1::g.14783::m.14783 [type:internal len:271 gc:universal SRR7914_TRINITY_DN28680_c0_g1_i1:3-812(+)]	type:5prime_partial len:462 gc:universal SRR7978_TRINITY_DN19127_c0_g1_i2:1-1386(+)	SRR7978_TRINITY_DN19127_c0_g1::SRR7978_TRINITY_DN19127_c0_g1_i2::g.37710::m.37710	IS_216438_Aes_Skin_Mucus_lane_Pann_DB	1	0.00872414	1	1	245	0.574837	50 kDa
SRR8017_TRINITY_DN26185_c5_g3::SRR8017_TRINITY_DN26185_c5_g3_i16::g.120759::m.120759 [type:complete len:329 gc:universal SRR8017_TRINITY_DN26185_c5_g3_i16:1948-2934(+)]	type:complete len:329 gc:universal SRR8017_TRINITY_DN26185_c5_g3_i16:1948-2934(+)	SRR8017_TRINITY_DN26185_c5_g3::SRR8017_TRINITY_DN26185_c5_g3_i16::g.120759::m.120759	IS_216438_Aes_Skin_Mucus_lane_Pann_DB	1	0.000712175	1	1	20	0.463415	36 kDa
SRR8021_TRINITY_DN19108_c0_g1::SRR8021_TRINITY_DN19108_c0_g1_i1::g.158603::m.158603 [type:complete len:458 gc:universal SRR8021_TRINITY_DN19108_c0_g1_i1:1966-593(-)]	type:5prime_partial len:347 gc:universal SRR7914_TRINITY_DN25132_c0_g1_i1:2-1042(+)	SRR7914_TRINITY_DN25132_c0_g1::SRR7914_TRINITY_DN25132_c0_g1_i1::g.9181::m.9181	IS_216438_Aes_Skin_Mucus_lane_Pann_DB	1	0.000249261	1	2	7	0.124277	39 kDa
SRR7979_TRINITY_DN19175_c2_g2::SRR7979_TRINITY_DN19175_c2_g2_i4::g.61265::m.61265 [type:complete len:300 gc:universal SRR7979_TRINITY_DN19175_c2_g2_i4:709-1608(+)]	type:complete len:300 gc:universal SRR8000_TRINITY_DN21043_c1_g1_i5:53-952(+)	SRR8000_TRINITY_DN21043_c1_g1::SRR8000_TRINITY_DN21043_c1_g1_i5::g.96130::m.96130	IS_216438_Aes_Skin_Mucus_lane_Pann_DB	1	0.00028487	1	1	8	0.153846	33 kDa
SRR7980_TRINITY_DN18970_c0_g1::SRR7980_TRINITY_DN18970_c0_g1_i5::g.80750::m.80750 [type:complete len:733 gc:universal SRR7980_TRINITY_DN18970_c0_g1_i5:433-2631(+)]	type:complete len:764 gc:universal SRR7980_TRINITY_DN18970_c0_g1_i9:102-2393(+)	SRR7980_TRINITY_DN18970_c0_g1::SRR7980_TRINITY_DN18970_c0_g1_i9::g.80757::m.80757	IS_216438_Aes_Skin_Mucus_lane_Pann_DB	0.99	0.000213652	0	0	6	0.0838794	88 kDa
SRR7914_TRINITY_DN77089_c0_g1::SRR7914_TRINITY_DN77089_c0_g1_i1::g.15132::m.15132 [type:complete len:138 gc:universal SRR7914_TRINITY_DN77089_c0_g1_i1:444-857(+)]	type:internal len:112 gc:universal SRR1329_TRINITY_DN342577_c1_g1_i14:1-333(+)	SRR1329_TRINITY_DN342577_c1_g1::SRR1329_TRINITY_DN342577_c1_g1_i14::g.194874::m.194874	IS_216438_Aes_Skin_Mucus_lane_Pann_DB	1	7.12175e-05	2	2	2	0.207207	13 kDa
SRR7978_TRINITY_DN19512_c0_g2::SRR7978_TRINITY_DN19512_c0_g2_i1::g.42596::m.42596 [type:complete len:152 gc:universal SRR7978_TRINITY_DN19512_c0_g2_i1:1299-844(-)]	type:complete len:152 gc:universal SRR7978_TRINITY_DN19512_c0_g2_i1:1299-844(-)	SRR7978_TRINITY_DN19512_c0_g2::SRR7978_TRINITY_DN19512_c0_g2_i1::g.42596::m.42596	IS_216438_Aes_Skin_Mucus_lane_Pann_DB	1	7.12175e-05	2	2	2	0.139073	17 kDa
SRR1330_TRINITY_DN116866_c6_g1::SRR1330_TRINITY_DN116866_c6_g1_i1::g.234746::m.234746 [type:5prime_partial len:194 gc:universal SRR1330_TRINITY_DN116866_c6_g1_i1:692-111(-)]	type:3prime_partial len:111 gc:universal SRR7914_TRINITY_DN26796_c0_g2_i1:330-1(-)	SRR7914_TRINITY_DN26796_c0_g2::SRR7914_TRINITY_DN26796_c0_g2_i1::g.14523::m.14523	IS_216438_Aes_Skin_Mucus_lane_Pann_DB	1	0.000213652	1	1	6	0.445455	12 kDa
SRR7980_TRINITY_DN17302_c0_g1::SRR7980_TRINITY_DN17302_c0_g1_i1::g.91478::m.91478 [type:complete len:127 gc:universal SRR7980_TRINITY_DN17302_c0_g1_i1:1180-800(-)]	type:complete len:127 gc:universal SRR7980_TRINITY_DN17302_c0_g1_i1:1180-800(-)	SRR7980_TRINITY_DN17302_c0_g1::SRR7980_TRINITY_DN17302_c0_g1_i1::g.91478::m.91478	IS_216438_Aes_Skin_Mucus_lane_Pann_DB	1	7.12175e-05	2	2	2	0.150794	14 kDa
SRR7978_TRINITY_DN17969_c4_g1::SRR7978_TRINITY_DN17969_c4_g1_i3::g.36136::m.36136 [type:complete len:764 gc:universal SRR7978_TRINITY_DN17969_c4_g1_i3:2718-427(-)]	type:complete len:764 gc:universal SRR7978_TRINITY_DN17969_c4_g1_i3:2718-427(-)	SRR7978_TRINITY_DN17969_c4_g1::SRR7978_TRINITY_DN17969_c4_g1_i3::g.36136::m.36136	IS_216438_Aes_Skin_Mucus_lane_Pann_DB	1	0.000106826	1	1	3	0.0602883	83 kDa
SRR7978_TRINITY_DN13470_c0_g1::SRR7978_TRINITY_DN13470_c0_g1_i2::g.39666::m.39666 [type:complete len:424 gc:universal SRR7978_TRINITY_DN13470_c0_g1_i2:287-1558(+)]	type:complete len:424 gc:universal SRR7978_TRINITY_DN13470_c0_g1_i2:287-1558(+)	SRR7978_TRINITY_DN13470_c0_g1::SRR7978_TRINITY_DN13470_c0_g1_i2::g.39666::m.39666	IS_216438_Aes_Skin_Mucus_lane_Pann_DB	1	7.12175e-05	2	2	2	0.070922	45 kDa
SRR8017_TRINITY_DN24317_c0_g1::SRR8017_TRINITY_DN24317_c0_g1_i3::g.115773::m.115773 [type:complete len:273 gc:universal SRR8017_TRINITY_DN24317_c0_g1_i3:2722-1904(-)]	type:complete len:273 gc:universal SRR8017_TRINITY_DN24317_c0_g1_i3:2722-1904(-)	SRR8017_TRINITY_DN24317_c0_g1::SRR8017_TRINITY_DN24317_c0_g1_i3::g.115773::m.115773	IS_216438_Aes_Skin_Mucus_lane_Pann_DB	1	7.12175e-05	2	2	2	0.106618	30 kDa
SRR7914_TRINITY_DN32267_c3_g1::SRR7914_TRINITY_DN32267_c3_g1_i4::g.20414::m.20414 [type:complete len:155 gc:universal SRR7914_TRINITY_DN32267_c3_g1_i4:7018-6554(-)]	type:complete len:155 gc:universal SRR7914_TRINITY_DN32267_c3_g1_i4:7018-6554(-)	SRR7914_TRINITY_DN32267_c3_g1::SRR7914_TRINITY_DN32267_c3_g1_i4::g.20414::m.20414	IS_216438_Aes_Skin_Mucus_lane_Pann_DB	1	0.000106826	2	2	3	0.201299	18 kDa
SRR7978_TRINITY_DN13576_c0_g1::SRR7978_TRINITY_DN13576_c0_g1_i1::g.43784::m.43784 [type:complete len:116 gc:universal SRR7978_TRINITY_DN13576_c0_g1_i1:504-851(+)]	type:complete len:116 gc:universal SRR7978_TRINITY_DN13576_c0_g1_i1:504-851(+)	SRR7978_TRINITY_DN13576_c0_g1::SRR7978_TRINITY_DN13576_c0_g1_i1::g.43784::m.43784	IS_216438_Aes_Skin_Mucus_lane_Pann_DB	1	0.000106826	2	2	3	0.208696	13 kDa
SRR8021_TRINITY_DN16954_c0_g1::SRR8021_TRINITY_DN16954_c0_g1_i1::g.158808::m.158808 [type:complete len:434 gc:universal SRR8021_TRINITY_DN16954_c0_g1_i1:272-1573(+)]	type:complete len:434 gc:universal SRR8021_TRINITY_DN16954_c0_g1_i1:272-1573(+)	SRR8021_TRINITY_DN16954_c0_g1::SRR8021_TRINITY_DN16954_c0_g1_i1::g.158808::m.158808	IS_216438_Aes_Skin_Mucus_lane_Pann_DB	1	0.000106826	2	2	3	0.039261	49 kDa
SRR7978_TRINITY_DN18116_c6_g1::SRR7978_TRINITY_DN18116_c6_g1_i1::g.29424::m.29424 [type:complete len:261 gc:universal SRR7978_TRINITY_DN18116_c6_g1_i1:3593-2811(-)]	type:5prime_partial len:235 gc:universal SRR1330_TRINITY_DN36457_c0_g1_i1:2-706(+)	SRR1330_TRINITY_DN36457_c0_g1::SRR1330_TRINITY_DN36457_c0_g1_i1::g.260852::m.260852	IS_216438_Aes_Skin_Mucus_lane_Pann_DB	1	7.12175e-05	2	2	2	0.0854701	24 kDa
SRR7979_TRINITY_DN14348_c0_g1::SRR7979_TRINITY_DN14348_c0_g1_i1::g.46978::m.46978 [type:complete len:313 gc:universal SRR7979_TRINITY_DN14348_c0_g1_i1:334-1272(+)]	type:complete len:313 gc:universal SRR7979_TRINITY_DN14348_c0_g1_i1:334-1272(+)	SRR7979_TRINITY_DN14348_c0_g1::SRR7979_TRINITY_DN14348_c0_g1_i1::g.46978::m.46978	IS_216438_Aes_Skin_Mucus_lane_Pann_DB	1	0.000106826	2	2	3	0.0833333	35 kDa
SRR8021_TRINITY_DN20889_c3_g1::SRR8021_TRINITY_DN20889_c3_g1_i3::g.151525::m.151525-DECOY [type:5prime_partial len:222 gc:universal SRR8021_TRINITY_DN20889_c3_g1_i3:1-666(+)]	type:5prime_partial len:331 gc:universal SRR7914_TRINITY_DN29905_c4_g1_i2:1756-764(-)	SRR7914_TRINITY_DN29905_c4_g1::SRR7914_TRINITY_DN29905_c4_g1_i2::g.10604::m.10604	IS_216438_Aes_Skin_Mucus_lane_Pann_DB	1	7.12175e-05	2	2	2	0.0333333	38 kDa
SRR7914_TRINITY_DN24024_c0_g1::SRR7914_TRINITY_DN24024_c0_g1_i2::g.4533::m.4533 [type:complete len:488 gc:universal SRR7914_TRINITY_DN24024_c0_g1_i2:1830-367(-)]	type:complete len:488 gc:universal SRR7914_TRINITY_DN24024_c0_g1_i2:1830-367(-)	SRR7914_TRINITY_DN24024_c0_g1::SRR7914_TRINITY_DN24024_c0_g1_i2::g.4533::m.4533	IS_216438_Aes_Skin_Mucus_lane_Pann_DB	0.99	7.12175e-05	2	2	2	0.0390144	56 kDa
SRR7980_TRINITY_DN19909_c0_g1::SRR7980_TRINITY_DN19909_c0_g1_i3::g.90240::m.90240 [type:complete len:227 gc:universal SRR7980_TRINITY_DN19909_c0_g1_i3:130-810(+)]	type:complete len:227 gc:universal SRR7980_TRINITY_DN19909_c0_g1_i3:130-810(+)	SRR7980_TRINITY_DN19909_c0_g1::SRR7980_TRINITY_DN19909_c0_g1_i3::g.90240::m.90240	IS_216438_Aes_Skin_Mucus_lane_Pann_DB	1	0.000178044	3	3	5	0.181416	25 kDa
SRR7978_TRINITY_DN17075_c0_g1::SRR7978_TRINITY_DN17075_c0_g1_i2::g.43943::m.43943 [type:complete len:110 gc:universal SRR7978_TRINITY_DN17075_c0_g1_i2:338-667(+)]	type:complete len:110 gc:universal SRR7978_TRINITY_DN17075_c0_g1_i2:338-667(+)	SRR7978_TRINITY_DN17075_c0_g1::SRR7978_TRINITY_DN17075_c0_g1_i2::g.43943::m.43943	IS_216438_Aes_Skin_Mucus_lane_Pann_DB	1	7.12175e-05	2	2	2	0.211009	12 kDa
SRR8020_TRINITY_DN28729_c1_g1::SRR8020_TRINITY_DN28729_c1_g1_i4::g.138537::m.138537 [type:complete len:322 gc:universal SRR8020_TRINITY_DN28729_c1_g1_i4:4189-5154(+)]	type:complete len:235 gc:universal SRR7979_TRINITY_DN17308_c1_g1_i2:1306-602(-)	SRR7979_TRINITY_DN17308_c1_g1::SRR7979_TRINITY_DN17308_c1_g1_i2::g.66664::m.66664	IS_216438_Aes_Skin_Mucus_lane_Pann_DB	1	0.000106826	3	3	3	0.111111	25 kDa
SRR8017_TRINITY_DN23581_c0_g1::SRR8017_TRINITY_DN23581_c0_g1_i1::g.116352::m.116352 [type:complete len:300 gc:universal SRR8017_TRINITY_DN23581_c0_g1_i1:69-968(+)]	type:complete len:300 gc:universal SRR8017_TRINITY_DN23581_c0_g1_i1:69-968(+)	SRR8017_TRINITY_DN23581_c0_g1::SRR8017_TRINITY_DN23581_c0_g1_i1::g.116352::m.116352	IS_216438_Aes_Skin_Mucus_lane_Pann_DB	1	0.000142435	3	3	4	0.177258	33 kDa
SRR7914_TRINITY_DN29073_c0_g1::SRR7914_TRINITY_DN29073_c0_g1_i10::g.15510::m.15510 [type:complete len:184 gc:universal SRR7914_TRINITY_DN29073_c0_g1_i10:393-944(+)]	type:complete len:184 gc:universal SRR7914_TRINITY_DN29073_c0_g1_i10:393-944(+)	SRR7914_TRINITY_DN29073_c0_g1::SRR7914_TRINITY_DN29073_c0_g1_i10::g.15510::m.15510	IS_216438_Aes_Skin_Mucus_lane_Pann_DB	1	0.000142435	4	4	4	0.234973	21 kDa
SRR7978_TRINITY_DN15025_c0_g1::SRR7978_TRINITY_DN15025_c0_g1_i1::g.38193::m.38193 [type:5prime_partial len:362 gc:universal SRR7978_TRINITY_DN15025_c0_g1_i1:2-1087(+)]	type:5prime_partial len:362 gc:universal SRR7978_TRINITY_DN15025_c0_g1_i1:2-1087(+)	SRR7978_TRINITY_DN15025_c0_g1::SRR7978_TRINITY_DN15025_c0_g1_i1::g.38193::m.38193	IS_216438_Aes_Skin_Mucus_lane_Pann_DB	1	0.000142435	2	3	4	0.105263	40 kDa
SRR7980_TRINITY_DN13987_c0_g1::SRR7980_TRINITY_DN13987_c0_g1_i1::g.78787::m.78787 [type:complete len:212 gc:universal SRR7980_TRINITY_DN13987_c0_g1_i1:413-1048(+)]	type:complete len:212 gc:universal SRR7980_TRINITY_DN13987_c0_g1_i1:413-1048(+)	SRR7980_TRINITY_DN13987_c0_g1::SRR7980_TRINITY_DN13987_c0_g1_i1::g.78787::m.78787	IS_216438_Aes_Skin_Mucus_lane_Pann_DB	1	0.000142435	2	2	4	0.175355	23 kDa
SRR7978_TRINITY_DN19894_c2_g2::SRR7978_TRINITY_DN19894_c2_g2_i1::g.36305::m.36305 [type:complete len:247 gc:universal SRR7978_TRINITY_DN19894_c2_g2_i1:550-1290(+)]	type:complete len:247 gc:universal SRR7978_TRINITY_DN19894_c2_g2_i1:550-1290(+)	SRR7978_TRINITY_DN19894_c2_g2::SRR7978_TRINITY_DN19894_c2_g2_i1::g.36305::m.36305	IS_216438_Aes_Skin_Mucus_lane_Pann_DB	1	0.000142435	2	2	4	0.142276	27 kDa
SRR7980_TRINITY_DN18445_c7_g1::SRR7980_TRINITY_DN18445_c7_g1_i4::g.82775::m.82775 [type:5prime_partial len:335 gc:universal SRR7980_TRINITY_DN18445_c7_g1_i4:3-1007(+)]	type:5prime_partial len:335 gc:universal SRR7980_TRINITY_DN18445_c7_g1_i4:3-1007(+)	SRR7980_TRINITY_DN18445_c7_g1::SRR7980_TRINITY_DN18445_c7_g1_i4::g.82775::m.82775	IS_216438_Aes_Skin_Mucus_lane_Pann_DB	1	0.000142435	2	3	4	0.0718563	38 kDa
SRR7980_TRINITY_DN19057_c1_g4::SRR7980_TRINITY_DN19057_c1_g4_i1::g.69821::m.69821 [type:complete len:296 gc:universal SRR7980_TRINITY_DN19057_c1_g4_i1:1113-226(-)]	type:complete len:296 gc:universal SRR7980_TRINITY_DN19057_c1_g4_i1:1113-226(-)	SRR7980_TRINITY_DN19057_c1_g4::SRR7980_TRINITY_DN19057_c1_g4_i1::g.69821::m.69821	IS_216438_Aes_Skin_Mucus_lane_Pann_DB	1	0.000142435	2	2	4	0.145763	34 kDa
SRR1330_TRINITY_DN123871_c0_g5::SRR1330_TRINITY_DN123871_c0_g5_i2::g.209378::m.209378 [type:complete len:377 gc:universal SRR1330_TRINITY_DN123871_c0_g5_i2:1904-774(-)]	type:complete len:378 gc:universal SRR7978_TRINITY_DN18397_c1_g4_i1:1389-256(-)	SRR7978_TRINITY_DN18397_c1_g4::SRR7978_TRINITY_DN18397_c1_g4_i1::g.26834::m.26834	IS_216438_Aes_Skin_Mucus_lane_Pann_DB	1	0.00210092	1	1	59	0.33687	42 kDa
SRR1330_TRINITY_DN123871_c0_g5::SRR1330_TRINITY_DN123871_c0_g5_i2::g.209378::m.209378 [type:complete len:377 gc:universal SRR1330_TRINITY_DN123871_c0_g5_i2:1904-774(-)]	type:5prime_partial len:177 gc:universal SRR7914_TRINITY_DN32483_c1_g4_i2:2-532(+)	SRR7914_TRINITY_DN32483_c1_g4::SRR7914_TRINITY_DN32483_c1_g4_i2::g.4239::m.4239	IS_216438_Aes_Skin_Mucus_lane_Pann_DB	0.99	0.00199409	1	1	56	0.5625	20 kDa
SRR7914_TRINITY_DN31354_c2_g8::SRR7914_TRINITY_DN31354_c2_g8_i1::g.5551::m.5551 [type:complete len:452 gc:universal SRR7914_TRINITY_DN31354_c2_g8_i1:1577-222(-)]	type:complete len:452 gc:universal SRR7980_TRINITY_DN18831_c0_g2_i1:487-1842(+)	SRR7980_TRINITY_DN18831_c0_g2::SRR7980_TRINITY_DN18831_c0_g2_i1::g.81046::m.81046	IS_216438_Aes_Skin_Mucus_lane_Pann_DB	1	0.000427305	0	0	12	0.330377	50 kDa
SRR7914_TRINITY_DN31354_c2_g8::SRR7914_TRINITY_DN31354_c2_g8_i1::g.5551::m.5551 [type:complete len:452 gc:universal SRR7914_TRINITY_DN31354_c2_g8_i1:1577-222(-)]	type:complete len:414 gc:universal SRR7978_TRINITY_DN19020_c4_g2_i1:1378-137(-)	SRR7978_TRINITY_DN19020_c4_g2::SRR7978_TRINITY_DN19020_c4_g2_i1::g.25386::m.25386	IS_216438_Aes_Skin_Mucus_lane_Pann_DB	1	0.00028487	1	1	8	0.276029	46 kDa
SRR7980_TRINITY_DN17791_c2_g3::SRR7980_TRINITY_DN17791_c2_g3_i1::g.87181::m.87181 [type:complete len:446 gc:universal SRR7980_TRINITY_DN17791_c2_g3_i1:214-1551(+)]	type:complete len:478 gc:universal SRR7978_TRINITY_DN18609_c3_g6_i1:242-1675(+)	SRR7978_TRINITY_DN18609_c3_g6::SRR7978_TRINITY_DN18609_c3_g6_i1::g.31968::m.31968	IS_216438_Aes_Skin_Mucus_lane_Pann_DB	1	0.000890218	1	1	25	0.396226	53 kDa
SRR7980_TRINITY_DN17791_c2_g3::SRR7980_TRINITY_DN17791_c2_g3_i1::g.87181::m.87181 [type:complete len:446 gc:universal SRR7980_TRINITY_DN17791_c2_g3_i1:214-1551(+)]	type:5prime_partial len:474 gc:universal SRR7978_TRINITY_DN18609_c3_g1_i1:1-1422(+)	SRR7978_TRINITY_DN18609_c3_g1::SRR7978_TRINITY_DN18609_c3_g1_i1::g.31962::m.31962	IS_216438_Aes_Skin_Mucus_lane_Pann_DB	1	0.000747783	1	2	21	0.272727	53 kDa
SRR7978_TRINITY_DN19247_c0_g1::SRR7978_TRINITY_DN19247_c0_g1_i1::g.30916::m.30916 [type:complete len:202 gc:universal SRR7978_TRINITY_DN19247_c0_g1_i1:566-1171(+)]	type:complete len:202 gc:universal SRR7978_TRINITY_DN19247_c0_g1_i1:566-1171(+)	SRR7978_TRINITY_DN19247_c0_g1::SRR7978_TRINITY_DN19247_c0_g1_i1::g.30916::m.30916	IS_216438_Aes_Skin_Mucus_lane_Pann_DB	1	0.000213652	1	1	6	0.303483	22 kDa
SRR7978_TRINITY_DN19247_c0_g8::SRR7978_TRINITY_DN19247_c0_g8_i2::g.30923::m.30923 [type:complete len:203 gc:universal SRR7978_TRINITY_DN19247_c0_g8_i2:442-1050(+)]	type:complete len:203 gc:universal SRR7978_TRINITY_DN19247_c0_g8_i2:442-1050(+)	SRR7978_TRINITY_DN19247_c0_g8::SRR7978_TRINITY_DN19247_c0_g8_i2::g.30923::m.30923	IS_216438_Aes_Skin_Mucus_lane_Pann_DB	1	0.000213652	1	1	6	0.30198	22 kDa
SRR7980_TRINITY_DN17983_c4_g1::SRR7980_TRINITY_DN17983_c4_g1_i10::g.83417::m.83417 [type:complete len:269 gc:universal SRR7980_TRINITY_DN17983_c4_g1_i10:1050-244(-)]	type:3prime_partial len:209 gc:universal SRR1329_TRINITY_DN349498_c0_g1_i7:64-687(+)	SRR1329_TRINITY_DN349498_c0_g1::SRR1329_TRINITY_DN349498_c0_g1_i7::g.191605::m.191605	IS_216438_Aes_Skin_Mucus_lane_Pann_DB	1	0.000106826	1	1	3	0.129808	26 kDa
SRR7914_TRINITY_DN31963_c0_g3::SRR7914_TRINITY_DN31963_c0_g3_i2::g.18074::m.18074 [type:5prime_partial len:146 gc:universal SRR7914_TRINITY_DN31963_c0_g3_i2:1-438(+)]	type:complete len:258 gc:universal SRR7980_TRINITY_DN19392_c1_g1_i3:2303-1530(-)	SRR7980_TRINITY_DN19392_c1_g1::SRR7980_TRINITY_DN19392_c1_g1_i3::g.88625::m.88625	IS_216438_Aes_Skin_Mucus_lane_Pann_DB	1	7.12175e-05	1	1	2	0.0817121	29 kDa
SRR7914_TRINITY_DN76803_c0_g1::SRR7914_TRINITY_DN76803_c0_g1_i1::g.13756::m.13756 [type:complete len:281 gc:universal SRR7914_TRINITY_DN76803_c0_g1_i1:1343-501(-)]	type:complete len:299 gc:universal SRR7914_TRINITY_DN30056_c1_g4_i3:1785-889(-)	SRR7914_TRINITY_DN30056_c1_g4::SRR7914_TRINITY_DN30056_c1_g4_i3::g.234::m.234	IS_216438_Aes_Skin_Mucus_lane_Pann_DB	0.99	7.12175e-05	1	1	2	0.107383	33 kDa
SRR7978_TRINITY_DN17351_c0_g1::SRR7978_TRINITY_DN17351_c0_g1_i2::g.43250::m.43250 [type:5prime_partial len:421 gc:universal SRR7978_TRINITY_DN17351_c0_g1_i2:1-1263(+)]	type:internal len:148 gc:universal SRR1329_TRINITY_DN350195_c20_g3_i2:443-3(-)	SRR1329_TRINITY_DN350195_c20_g3::SRR1329_TRINITY_DN350195_c20_g3_i2::g.176472::m.176472	IS_216438_Aes_Skin_Mucus_lane_Pann_DB	1	7.12175e-05	2	2	2	0.14966	16 kDa
SRR7978_TRINITY_DN42699_c0_g1::SRR7978_TRINITY_DN42699_c0_g1_i1::g.36868::m.36868 [type:complete len:131 gc:universal SRR7978_TRINITY_DN42699_c0_g1_i1:161-553(+)]	type:complete len:131 gc:universal SRR7978_TRINITY_DN42699_c0_g1_i1:161-553(+)	SRR7978_TRINITY_DN42699_c0_g1::SRR7978_TRINITY_DN42699_c0_g1_i1::g.36868::m.36868	IS_216438_Aes_Skin_Mucus_lane_Pann_DB	1	7.12175e-05	2	2	2	0.230769	13 kDa
SRR7978_TRINITY_DN20110_c0_g2::SRR7978_TRINITY_DN20110_c0_g2_i4::g.40104::m.40104 [type:complete len:317 gc:universal SRR7978_TRINITY_DN20110_c0_g2_i4:229-1179(+)]	type:complete len:317 gc:universal SRR7978_TRINITY_DN20110_c0_g2_i4:229-1179(+)	SRR7978_TRINITY_DN20110_c0_g2::SRR7978_TRINITY_DN20110_c0_g2_i4::g.40104::m.40104	IS_216438_Aes_Skin_Mucus_lane_Pann_DB	0.99	0.000106826	1	1	3	0.056962	36 kDa
SRR7980_TRINITY_DN19032_c0_g2::SRR7980_TRINITY_DN19032_c0_g2_i1::g.70286::m.70286 [type:complete len:352 gc:universal SRR7980_TRINITY_DN19032_c0_g2_i1:378-1433(+)]	type:complete len:352 gc:universal SRR7980_TRINITY_DN19032_c0_g2_i1:378-1433(+)	SRR7980_TRINITY_DN19032_c0_g2::SRR7980_TRINITY_DN19032_c0_g2_i1::g.70286::m.70286	IS_216438_Aes_Skin_Mucus_lane_Pann_DB	1	7.12175e-05	2	2	2	0.039886	39 kDa
SRR7978_TRINITY_DN17891_c1_g1::SRR7978_TRINITY_DN17891_c1_g1_i2::g.28078::m.28078 [type:5prime_partial len:266 gc:universal SRR7978_TRINITY_DN17891_c1_g1_i2:1-798(+)]	type:complete len:331 gc:universal SRR1330_TRINITY_DN123320_c0_g1_i8:1257-265(-)	SRR1330_TRINITY_DN123320_c0_g1::SRR1330_TRINITY_DN123320_c0_g1_i8::g.232581::m.232581	IS_216438_Aes_Skin_Mucus_lane_Pann_DB	0.99	0.000356087	2	2	10	0.260606	37 kDa
SRR8021_TRINITY_DN6440_c0_g1::SRR8021_TRINITY_DN6440_c0_g1_i2::g.153635::m.153635 [type:complete len:282 gc:universal SRR8021_TRINITY_DN6440_c0_g1_i2:323-1168(+)]	type:complete len:282 gc:universal SRR8021_TRINITY_DN6440_c0_g1_i2:323-1168(+)	SRR8021_TRINITY_DN6440_c0_g1::SRR8021_TRINITY_DN6440_c0_g1_i2::g.153635::m.153635	IS_216438_Aes_Skin_Mucus_lane_Pann_DB	1	0.000142435	2	2	4	0.16726	31 kDa
SRR7980_TRINITY_DN17435_c0_g1::SRR7980_TRINITY_DN17435_c0_g1_i1::g.81840::m.81840 [type:complete len:1108 gc:universal SRR7980_TRINITY_DN17435_c0_g1_i1:379-3702(+)]	type:complete len:1108 gc:universal SRR7980_TRINITY_DN17435_c0_g1_i1:379-3702(+)	SRR7980_TRINITY_DN17435_c0_g1::SRR7980_TRINITY_DN17435_c0_g1_i1::g.81840::m.81840	IS_216438_Aes_Skin_Mucus_lane_Pann_DB	1	7.12175e-05	2	2	2	0.0325203	124 kDa
SRR7914_TRINITY_DN40294_c0_g1::SRR7914_TRINITY_DN40294_c0_g1_i1::g.3824::m.3824 [type:5prime_partial len:143 gc:universal SRR7914_TRINITY_DN40294_c0_g1_i1:628-200(-)]	type:5prime_partial len:143 gc:universal SRR7914_TRINITY_DN40294_c0_g1_i1:628-200(-)	SRR7914_TRINITY_DN40294_c0_g1::SRR7914_TRINITY_DN40294_c0_g1_i1::g.3824::m.3824	IS_216438_Aes_Skin_Mucus_lane_Pann_DB	1	0.000534131	2	2	15	0.253521	15 kDa
SRR7978_TRINITY_DN13550_c0_g1::SRR7978_TRINITY_DN13550_c0_g1_i1::g.43752::m.43752 [type:complete len:487 gc:universal SRR7978_TRINITY_DN13550_c0_g1_i1:758-2218(+)]	type:complete len:487 gc:universal SRR7978_TRINITY_DN13550_c0_g1_i1:758-2218(+)	SRR7978_TRINITY_DN13550_c0_g1::SRR7978_TRINITY_DN13550_c0_g1_i1::g.43752::m.43752	IS_216438_Aes_Skin_Mucus_lane_Pann_DB	1	0.000106826	3	3	3	0.106996	54 kDa
SRR8017_TRINITY_DN26520_c0_g1::SRR8017_TRINITY_DN26520_c0_g1_i1::g.116977::m.116977 [type:3prime_partial len:263 gc:universal SRR8017_TRINITY_DN26520_c0_g1_i1:786-1(-)]	type:3prime_partial len:263 gc:universal SRR8017_TRINITY_DN26520_c0_g1_i1:786-1(-)	SRR8017_TRINITY_DN26520_c0_g1::SRR8017_TRINITY_DN26520_c0_g1_i1::g.116977::m.116977	IS_216438_Aes_Skin_Mucus_lane_Pann_DB	1	0.00085461	3	3	24	0.667939	29 kDa
SRR8017_TRINITY_DN25931_c1_g3::SRR8017_TRINITY_DN25931_c1_g3_i1::g.119694::m.119694 [type:complete len:267 gc:universal SRR8017_TRINITY_DN25931_c1_g3_i1:183-983(+)]	type:5prime_partial len:270 gc:universal SRR1330_TRINITY_DN112741_c0_g1_i1:2-811(+)	SRR1330_TRINITY_DN112741_c0_g1::SRR1330_TRINITY_DN112741_c0_g1_i1::g.245711::m.245711	IS_216438_Aes_Skin_Mucus_lane_Pann_DB	1	0.000106826	3	3	3	0.148699	30 kDa
SRR7980_TRINITY_DN19398_c0_g1::SRR7980_TRINITY_DN19398_c0_g1_i2::g.88458::m.88458 [type:complete len:350 gc:universal SRR7980_TRINITY_DN19398_c0_g1_i2:303-1352(+)]	type:complete len:350 gc:universal SRR7980_TRINITY_DN19398_c0_g1_i2:303-1352(+)	SRR7980_TRINITY_DN19398_c0_g1::SRR7980_TRINITY_DN19398_c0_g1_i2::g.88458::m.88458	IS_216438_Aes_Skin_Mucus_lane_Pann_DB	1	0.000106826	3	3	3	0.137536	40 kDa
SRR7979_TRINITY_DN14182_c0_g1::SRR7979_TRINITY_DN14182_c0_g1_i1::g.51100::m.51100 [type:complete len:592 gc:universal SRR7979_TRINITY_DN14182_c0_g1_i1:1943-168(-)]	type:complete len:592 gc:universal SRR7979_TRINITY_DN14182_c0_g1_i1:1943-168(-)	SRR7979_TRINITY_DN14182_c0_g1::SRR7979_TRINITY_DN14182_c0_g1_i1::g.51100::m.51100	IS_216438_Aes_Skin_Mucus_lane_Pann_DB	1	0.000106826	3	3	3	0.0879865	65 kDa
SRR7978_TRINITY_DN19675_c7_g2::SRR7978_TRINITY_DN19675_c7_g2_i2::g.29887::m.29887 [type:3prime_partial len:437 gc:universal SRR7978_TRINITY_DN19675_c7_g2_i2:246-1553(+)]	type:complete len:990 gc:universal SRR7980_TRINITY_DN18545_c1_g3_i2:429-3398(+)	SRR7980_TRINITY_DN18545_c1_g3::SRR7980_TRINITY_DN18545_c1_g3_i2::g.84726::m.84726	IS_216438_Aes_Skin_Mucus_lane_Pann_DB	1	0.000106826	2	2	3	0.0273003	112 kDa
SRR8021_TRINITY_DN16056_c0_g1::SRR8021_TRINITY_DN16056_c0_g1_i1::g.160301::m.160301 [type:complete len:371 gc:universal SRR8021_TRINITY_DN16056_c0_g1_i1:238-1350(+)]	type:complete len:371 gc:universal SRR8021_TRINITY_DN16056_c0_g1_i1:238-1350(+)	SRR8021_TRINITY_DN16056_c0_g1::SRR8021_TRINITY_DN16056_c0_g1_i1::g.160301::m.160301	IS_216438_Aes_Skin_Mucus_lane_Pann_DB	1	0.000106826	3	3	3	0.121622	41 kDa
SRR7979_TRINITY_DN19488_c2_g1::SRR7979_TRINITY_DN19488_c2_g1_i5::g.69020::m.69020 [type:complete len:279 gc:universal SRR7979_TRINITY_DN19488_c2_g1_i5:598-1434(+)]	type:complete len:198 gc:universal SRR7914_TRINITY_DN29565_c5_g3_i1:363-956(+)	SRR7914_TRINITY_DN29565_c5_g3::SRR7914_TRINITY_DN29565_c5_g3_i1::g.15864::m.15864	IS_216438_Aes_Skin_Mucus_lane_Pann_DB	1	0.000106826	2	2	3	0.228426	21 kDa
SRR7914_TRINITY_DN32415_c4_g1::SRR7914_TRINITY_DN32415_c4_g1_i8::g.4312::m.4312 [type:complete len:136 gc:universal SRR7914_TRINITY_DN32415_c4_g1_i8:100-507(+)]	type:complete len:243 gc:universal SRR7978_TRINITY_DN19973_c0_g1_i11:1333-605(-)	SRR7978_TRINITY_DN19973_c0_g1::SRR7978_TRINITY_DN19973_c0_g1_i11::g.42036::m.42036	IS_216438_Aes_Skin_Mucus_lane_Pann_DB	1	0.000213652	2	3	6	0.210744	27 kDa
SRR7914_TRINITY_DN25508_c0_g1::SRR7914_TRINITY_DN25508_c0_g1_i1::g.3738::m.3738 [type:complete len:258 gc:universal SRR7914_TRINITY_DN25508_c0_g1_i1:100-873(+)]	type:complete len:258 gc:universal SRR7914_TRINITY_DN25508_c0_g1_i1:100-873(+)	SRR7914_TRINITY_DN25508_c0_g1::SRR7914_TRINITY_DN25508_c0_g1_i1::g.3738::m.3738	IS_216438_Aes_Skin_Mucus_lane_Pann_DB	1	0.000106826	2	2	3	0.0700389	28 kDa
SRR8017_TRINITY_DN25171_c4_g1::SRR8017_TRINITY_DN25171_c4_g1_i1::g.108147::m.108147 [type:complete len:303 gc:universal SRR8017_TRINITY_DN25171_c4_g1_i1:143-1051(+)]	type:complete len:303 gc:universal SRR8017_TRINITY_DN25171_c4_g1_i1:143-1051(+)	SRR8017_TRINITY_DN25171_c4_g1::SRR8017_TRINITY_DN25171_c4_g1_i1::g.108147::m.108147	IS_216438_Aes_Skin_Mucus_lane_Pann_DB	1	0.000106826	3	3	3	0.112583	34 kDa
SRR8020_TRINITY_DN28515_c1_g7::SRR8020_TRINITY_DN28515_c1_g7_i3::g.143068::m.143068 [type:complete len:478 gc:universal SRR8020_TRINITY_DN28515_c1_g7_i3:136-1569(+)]	type:complete len:478 gc:universal SRR8020_TRINITY_DN28515_c1_g7_i3:136-1569(+)	SRR8020_TRINITY_DN28515_c1_g7::SRR8020_TRINITY_DN28515_c1_g7_i3::g.143068::m.143068	IS_216438_Aes_Skin_Mucus_lane_Pann_DB	0.99	0.000106826	3	3	3	0.0188679	54 kDa
SRR7979_TRINITY_DN17648_c1_g2::SRR7979_TRINITY_DN17648_c1_g2_i2::g.64434::m.64434 [type:complete len:137 gc:universal SRR7979_TRINITY_DN17648_c1_g2_i2:486-896(+)]	type:5prime_partial len:128 gc:universal SRR1329_TRINITY_DN339826_c0_g2_i1:633-250(-)	SRR1329_TRINITY_DN339826_c0_g2::SRR1329_TRINITY_DN339826_c0_g2_i1::g.187104::m.187104	IS_216438_Aes_Skin_Mucus_lane_Pann_DB	1	0.00124631	1	2	35	0.614173	14 kDa
SRR1329_TRINITY_DN338962_c1_g1::SRR1329_TRINITY_DN338962_c1_g1_i1::g.192851::m.192851 [type:internal len:183 gc:universal SRR1329_TRINITY_DN338962_c1_g1_i1:548-3(-)]	type:3prime_partial len:392 gc:universal SRR8017_TRINITY_DN26716_c0_g3_i2:72-1244(+)	SRR8017_TRINITY_DN26716_c0_g3::SRR8017_TRINITY_DN26716_c0_g3_i2::g.112441::m.112441	IS_216438_Aes_Skin_Mucus_lane_Pann_DB	1	0.000462914	1	1	13	0.263427	42 kDa
SRR7914_TRINITY_DN30438_c0_g3::SRR7914_TRINITY_DN30438_c0_g3_i1::g.23035::m.23035 [type:complete len:202 gc:universal SRR7914_TRINITY_DN30438_c0_g3_i1:3051-2446(-)]	type:complete len:202 gc:universal SRR7914_TRINITY_DN30438_c0_g3_i1:3051-2446(-)	SRR7914_TRINITY_DN30438_c0_g3::SRR7914_TRINITY_DN30438_c0_g3_i1::g.23035::m.23035	IS_216438_Aes_Skin_Mucus_lane_Pann_DB	1	0.000142435	1	1	4	0.164179	23 kDa
SRR1330_TRINITY_DN120794_c9_g3::SRR1330_TRINITY_DN120794_c9_g3_i1::g.222941::m.222941 [type:complete len:135 gc:universal SRR1330_TRINITY_DN120794_c9_g3_i1:135-539(+)]	type:complete len:475 gc:universal SRR7978_TRINITY_DN17969_c4_g1_i2:322-1746(+)	SRR7978_TRINITY_DN17969_c4_g1::SRR7978_TRINITY_DN17969_c4_g1_i2::g.36134::m.36134	IS_216438_Aes_Skin_Mucus_lane_Pann_DB	1	0.000142435	1	1	4	0.135021	51 kDa
SRR1329_TRINITY_DN344804_c1_g1::SRR1329_TRINITY_DN344804_c1_g1_i1::g.186798::m.186798 [type:complete len:626 gc:universal SRR1329_TRINITY_DN344804_c1_g1_i1:2249-372(-)]	type:complete len:626 gc:universal SRR1329_TRINITY_DN344804_c1_g1_i1:2249-372(-)	SRR1329_TRINITY_DN344804_c1_g1::SRR1329_TRINITY_DN344804_c1_g1_i1::g.186798::m.186798	IS_216438_Aes_Skin_Mucus_lane_Pann_DB	0.99	7.12175e-05	1	1	2	0.0544	68 kDa
SRR7979_TRINITY_DN17453_c4_g1::SRR7979_TRINITY_DN17453_c4_g1_i1::g.57794::m.57794 [type:complete len:324 gc:universal SRR7979_TRINITY_DN17453_c4_g1_i1:233-1204(+)]	type:5prime_partial len:256 gc:universal SRR1330_TRINITY_DN123067_c1_g2_i1:804-37(-)	SRR1330_TRINITY_DN123067_c1_g2::SRR1330_TRINITY_DN123067_c1_g2_i1::g.219258::m.219258	IS_216438_Aes_Skin_Mucus_lane_Pann_DB	1	0.000142435	1	1	4	0.0862745	29 kDa
SRR7914_TRINITY_DN29934_c0_g2::SRR7914_TRINITY_DN29934_c0_g2_i1::g.10779::m.10779 [type:5prime_partial len:300 gc:universal SRR7914_TRINITY_DN29934_c0_g2_i1:3-902(+)]	type:internal len:113 gc:universal SRR1330_TRINITY_DN27387_c0_g1_i1:1-336(+)	SRR1330_TRINITY_DN27387_c0_g1::SRR1330_TRINITY_DN27387_c0_g1_i1::g.262954::m.262954	IS_216438_Aes_Skin_Mucus_lane_Pann_DB	1	0.000640957	1	1	18	0.535714	12 kDa
SRR7980_TRINITY_DN18126_c6_g3::SRR7980_TRINITY_DN18126_c6_g3_i3::g.75639::m.75639 [type:complete len:293 gc:universal SRR7980_TRINITY_DN18126_c6_g3_i3:1574-2452(+)]	type:complete len:274 gc:universal SRR7978_TRINITY_DN6886_c0_g1_i2:1101-280(-)	SRR7978_TRINITY_DN6886_c0_g1::SRR7978_TRINITY_DN6886_c0_g1_i2::g.30350::m.30350	IS_216438_Aes_Skin_Mucus_lane_Pann_DB	1	7.12175e-05	2	2	2	0.0842491	30 kDa
SRR7980_TRINITY_DN18510_c1_g2::SRR7980_TRINITY_DN18510_c1_g2_i2::g.84227::m.84227 [type:complete len:292 gc:universal SRR7980_TRINITY_DN18510_c1_g2_i2:177-1052(+)]	type:complete len:135 gc:universal SRR1330_TRINITY_DN112708_c0_g1_i1:59-463(+)	SRR1330_TRINITY_DN112708_c0_g1::SRR1330_TRINITY_DN112708_c0_g1_i1::g.245654::m.245654	IS_216438_Aes_Skin_Mucus_lane_Pann_DB	1	7.12175e-05	2	2	2	0.186567	15 kDa
SRR8020_TRINITY_DN24459_c0_g1::SRR8020_TRINITY_DN24459_c0_g1_i1::g.129104::m.129104 [type:complete len:310 gc:universal SRR8020_TRINITY_DN24459_c0_g1_i1:137-1066(+)]	type:complete len:310 gc:universal SRR8020_TRINITY_DN24459_c0_g1_i1:137-1066(+)	SRR8020_TRINITY_DN24459_c0_g1::SRR8020_TRINITY_DN24459_c0_g1_i1::g.129104::m.129104	IS_216438_Aes_Skin_Mucus_lane_Pann_DB	1	7.12175e-05	2	2	2	0.122977	34 kDa
SRR7980_TRINITY_DN44355_c0_g1::SRR7980_TRINITY_DN44355_c0_g1_i1::g.71272::m.71272 [type:complete len:116 gc:universal SRR7980_TRINITY_DN44355_c0_g1_i1:38-385(+)]	type:internal len:154 gc:universal SRR1329_TRINITY_DN350358_c6_g5_i3:1-459(+)	SRR1329_TRINITY_DN350358_c6_g5::SRR1329_TRINITY_DN350358_c6_g5_i3::g.182930::m.182930	IS_216438_Aes_Skin_Mucus_lane_Pann_DB	1	7.12175e-05	2	2	2	0.202614	17 kDa
SRR7980_TRINITY_DN19226_c3_g2::SRR7980_TRINITY_DN19226_c3_g2_i1::g.76739::m.76739 [type:complete len:398 gc:universal SRR7980_TRINITY_DN19226_c3_g2_i1:150-1343(+)]	type:complete len:398 gc:universal SRR7980_TRINITY_DN19226_c3_g2_i1:150-1343(+)	SRR7980_TRINITY_DN19226_c3_g2::SRR7980_TRINITY_DN19226_c3_g2_i1::g.76739::m.76739	IS_216438_Aes_Skin_Mucus_lane_Pann_DB	1	7.12175e-05	2	2	2	0.0629723	45 kDa
SRR8021_TRINITY_DN19886_c0_g1::SRR8021_TRINITY_DN19886_c0_g1_i2::g.158349::m.158349 [type:complete len:935 gc:universal SRR8021_TRINITY_DN19886_c0_g1_i2:213-3017(+)]	type:complete len:318 gc:universal SRR7979_TRINITY_DN18275_c7_g4_i1:1098-145(-)	SRR7979_TRINITY_DN18275_c7_g4::SRR7979_TRINITY_DN18275_c7_g4_i1::g.61549::m.61549	IS_216438_Aes_Skin_Mucus_lane_Pann_DB	1	7.12175e-05	2	2	2	0.189274	34 kDa
SRR7914_TRINITY_DN27292_c0_g2::SRR7914_TRINITY_DN27292_c0_g2_i1::g.9855::m.9855 [type:5prime_partial len:247 gc:universal SRR7914_TRINITY_DN27292_c0_g2_i1:771-31(-)]	type:complete len:378 gc:universal SRR7980_TRINITY_DN18863_c5_g5_i1:1741-608(-)	SRR7980_TRINITY_DN18863_c5_g5::SRR7980_TRINITY_DN18863_c5_g5_i1::g.81409::m.81409	IS_216438_Aes_Skin_Mucus_lane_Pann_DB	1	0.000106826	1	1	3	0.0875332	43 kDa
SRR7980_TRINITY_DN15936_c0_g1::SRR7980_TRINITY_DN15936_c0_g1_i1::g.89555::m.89555 [type:complete len:118 gc:universal SRR7980_TRINITY_DN15936_c0_g1_i1:1679-1326(-)]	type:complete len:135 gc:universal SRR1330_TRINITY_DN12848_c0_g1_i2:173-577(+)	SRR1330_TRINITY_DN12848_c0_g1::SRR1330_TRINITY_DN12848_c0_g1_i2::g.263035::m.263035	IS_216438_Aes_Skin_Mucus_lane_Pann_DB	1	7.12175e-05	2	2	2	0.134328	15 kDa
SRR7980_TRINITY_DN18010_c4_g1::SRR7980_TRINITY_DN18010_c4_g1_i1::g.92754::m.92754 [type:complete len:224 gc:universal SRR7980_TRINITY_DN18010_c4_g1_i1:509-1180(+)]	type:complete len:224 gc:universal SRR7980_TRINITY_DN18010_c4_g1_i1:509-1180(+)	SRR7980_TRINITY_DN18010_c4_g1::SRR7980_TRINITY_DN18010_c4_g1_i1::g.92754::m.92754	IS_216438_Aes_Skin_Mucus_lane_Pann_DB	1	7.12175e-05	2	2	2	0.147982	25 kDa
SRR8020_TRINITY_DN28355_c2_g2::SRR8020_TRINITY_DN28355_c2_g2_i4::g.122974::m.122974 [type:complete len:286 gc:universal SRR8020_TRINITY_DN28355_c2_g2_i4:229-1086(+)]	type:complete len:285 gc:universal SRR7978_TRINITY_DN16280_c0_g1_i1:369-1223(+)	SRR7978_TRINITY_DN16280_c0_g1::SRR7978_TRINITY_DN16280_c0_g1_i1::g.28680::m.28680	IS_216438_Aes_Skin_Mucus_lane_Pann_DB	1	7.12175e-05	2	2	2	0.126761	30 kDa
SRR7978_TRINITY_DN14552_c0_g2::SRR7978_TRINITY_DN14552_c0_g2_i1::g.26207::m.26207 [type:complete len:208 gc:universal SRR7978_TRINITY_DN14552_c0_g2_i1:2258-1635(-)]	type:complete len:208 gc:universal SRR7978_TRINITY_DN14552_c0_g2_i1:2258-1635(-)	SRR7978_TRINITY_DN14552_c0_g2::SRR7978_TRINITY_DN14552_c0_g2_i1::g.26207::m.26207	IS_216438_Aes_Skin_Mucus_lane_Pann_DB	1	7.12175e-05	2	2	2	0.057971	24 kDa
SRR8017_TRINITY_DN4083_c0_g1::SRR8017_TRINITY_DN4083_c0_g1_i1::g.114356::m.114356 [type:complete len:264 gc:universal SRR8017_TRINITY_DN4083_c0_g1_i1:1734-943(-)]	type:complete len:264 gc:universal SRR8017_TRINITY_DN4083_c0_g1_i1:1734-943(-)	SRR8017_TRINITY_DN4083_c0_g1::SRR8017_TRINITY_DN4083_c0_g1_i1::g.114356::m.114356	IS_216438_Aes_Skin_Mucus_lane_Pann_DB	1	7.12175e-05	2	2	2	0.148289	30 kDa
SRR8021_TRINITY_DN17081_c0_g1::SRR8021_TRINITY_DN17081_c0_g1_i1::g.161539::m.161539 [type:complete len:293 gc:universal SRR8021_TRINITY_DN17081_c0_g1_i1:98-976(+)]	type:complete len:293 gc:universal SRR8021_TRINITY_DN17081_c0_g1_i1:98-976(+)	SRR8021_TRINITY_DN17081_c0_g1::SRR8021_TRINITY_DN17081_c0_g1_i1::g.161539::m.161539	IS_216438_Aes_Skin_Mucus_lane_Pann_DB	1	7.12175e-05	2	2	2	0.0479452	33 kDa
SRR8020_TRINITY_DN25814_c0_g1::SRR8020_TRINITY_DN25814_c0_g1_i1::g.131650::m.131650 [type:complete len:478 gc:universal SRR8020_TRINITY_DN25814_c0_g1_i1:274-1707(+)]	type:complete len:458 gc:universal SRR7978_TRINITY_DN18118_c0_g1_i5:2345-972(-)	SRR7978_TRINITY_DN18118_c0_g1::SRR7978_TRINITY_DN18118_c0_g1_i5::g.29231::m.29231	IS_216438_Aes_Skin_Mucus_lane_Pann_DB	1	7.12175e-05	2	2	2	0.0284464	55 kDa
SRR8020_TRINITY_DN25325_c0_g1::SRR8020_TRINITY_DN25325_c0_g1_i1::g.148609::m.148609 [type:5prime_partial len:928 gc:universal SRR8020_TRINITY_DN25325_c0_g1_i1:1-2784(+)]	type:5prime_partial len:928 gc:universal SRR8020_TRINITY_DN25325_c0_g1_i1:1-2784(+)	SRR8020_TRINITY_DN25325_c0_g1::SRR8020_TRINITY_DN25325_c0_g1_i1::g.148609::m.148609	IS_216438_Aes_Skin_Mucus_lane_Pann_DB	1	7.12175e-05	2	2	2	0.0409924	101 kDa
SRR7978_TRINITY_DN12413_c0_g1::SRR7978_TRINITY_DN12413_c0_g1_i1::g.25696::m.25696 [type:complete len:274 gc:universal SRR7978_TRINITY_DN12413_c0_g1_i1:1026-205(-)]	type:5prime_partial len:208 gc:universal SRR1329_TRINITY_DN343621_c0_g1_i9:2-625(+)	SRR1329_TRINITY_DN343621_c0_g1::SRR1329_TRINITY_DN343621_c0_g1_i9::g.191272::m.191272	IS_216438_Aes_Skin_Mucus_lane_Pann_DB	1	7.12175e-05	2	2	2	0.15942	23 kDa
SRR1330_TRINITY_DN123372_c5_g4::SRR1330_TRINITY_DN123372_c5_g4_i1::g.232716::m.232716 [type:complete len:221 gc:universal SRR1330_TRINITY_DN123372_c5_g4_i1:1946-1284(-)]	type:complete len:221 gc:universal SRR1330_TRINITY_DN123372_c5_g4_i1:1946-1284(-)	SRR1330_TRINITY_DN123372_c5_g4::SRR1330_TRINITY_DN123372_c5_g4_i1::g.232716::m.232716	IS_216438_Aes_Skin_Mucus_lane_Pann_DB	0.99	7.12175e-05	2	2	2	0.154545	25 kDa
SRR1330_TRINITY_DN58037_c1_g1::SRR1330_TRINITY_DN58037_c1_g1_i1::g.258639::m.258639 [type:internal len:271 gc:universal SRR1330_TRINITY_DN58037_c1_g1_i1:3-812(+)]	type:internal len:271 gc:universal SRR1330_TRINITY_DN58037_c1_g1_i1:3-812(+)	SRR1330_TRINITY_DN58037_c1_g1::SRR1330_TRINITY_DN58037_c1_g1_i1::g.258639::m.258639	IS_216438_Aes_Skin_Mucus_lane_Pann_DB	0.99	7.12175e-05	2	2	2	0.12963	29 kDa
SRR7978_TRINITY_DN18731_c2_g1::SRR7978_TRINITY_DN18731_c2_g1_i2::g.32971::m.32971 [type:complete len:119 gc:universal SRR7978_TRINITY_DN18731_c2_g1_i2:167-523(+)]	type:complete len:109 gc:universal SRR7979_TRINITY_DN19277_c0_g2_i1:460-134(-)	SRR7979_TRINITY_DN19277_c0_g2::SRR7979_TRINITY_DN19277_c0_g2_i1::g.53318::m.53318	IS_216438_Aes_Skin_Mucus_lane_Pann_DB	0.99	7.12175e-05	2	2	2	0.314815	12 kDa
SRR7914_TRINITY_DN28713_c0_g1::SRR7914_TRINITY_DN28713_c0_g1_i3::g.15029::m.15029 [type:5prime_partial len:568 gc:universal SRR7914_TRINITY_DN28713_c0_g1_i3:2103-400(-)]	type:complete len:251 gc:universal SRR7980_TRINITY_DN16238_c0_g1_i5:433-1185(+)	SRR7980_TRINITY_DN16238_c0_g1::SRR7980_TRINITY_DN16238_c0_g1_i5::g.74450::m.74450	IS_216438_Aes_Skin_Mucus_lane_Pann_DB	1	0.000178044	0	0	5	0.308	28 kDa
SRR8000_TRINITY_DN21137_c3_g3::SRR8000_TRINITY_DN21137_c3_g3_i1::g.97041::m.97041 [type:complete len:463 gc:universal SRR8000_TRINITY_DN21137_c3_g3_i1:1660-272(-)]	type:complete len:463 gc:universal SRR8000_TRINITY_DN21137_c3_g3_i1:1660-272(-)	SRR8000_TRINITY_DN21137_c3_g3::SRR8000_TRINITY_DN21137_c3_g3_i1::g.97041::m.97041	IS_216438_Aes_Skin_Mucus_lane_Pann_DB	0.99	0.000783392	1	1	22	0.322511	50 kDa
SRR8000_TRINITY_DN21371_c5_g3::SRR8000_TRINITY_DN21371_c5_g3_i2::g.94110::m.94110 [type:complete len:197 gc:universal SRR8000_TRINITY_DN21371_c5_g3_i2:1404-814(-)]	type:complete len:160 gc:universal SRR8021_TRINITY_DN21520_c2_g1_i2:1614-2093(+)	SRR8021_TRINITY_DN21520_c2_g1::SRR8021_TRINITY_DN21520_c2_g1_i2::g.156453::m.156453	IS_216438_Aes_Skin_Mucus_lane_Pann_DB	1	0.000178044	1	1	5	0.339623	18 kDa
SRR8017_TRINITY_DN26941_c1_g1::SRR8017_TRINITY_DN26941_c1_g1_i4::g.110048::m.110048 [type:complete len:465 gc:universal SRR8017_TRINITY_DN26941_c1_g1_i4:1740-346(-)]	type:complete len:465 gc:universal SRR8017_TRINITY_DN26941_c1_g1_i4:1740-346(-)	SRR8017_TRINITY_DN26941_c1_g1::SRR8017_TRINITY_DN26941_c1_g1_i4::g.110048::m.110048	IS_216438_Aes_Skin_Mucus_lane_Pann_DB	1	0.00149557	1	1	42	0.471983	54 kDa
SRR8000_TRINITY_DN22185_c2_g1::SRR8000_TRINITY_DN22185_c2_g1_i1::g.101448::m.101448 [type:complete len:891 gc:universal SRR8000_TRINITY_DN22185_c2_g1_i1:195-2867(+)]	type:complete len:891 gc:universal SRR8000_TRINITY_DN22185_c2_g1_i1:195-2867(+)	SRR8000_TRINITY_DN22185_c2_g1::SRR8000_TRINITY_DN22185_c2_g1_i1::g.101448::m.101448	IS_216438_Aes_Skin_Mucus_lane_Pann_DB	1	0.000498522	1	1	14	0.18427	103 kDa
SRR7980_TRINITY_DN17784_c5_g3::SRR7980_TRINITY_DN17784_c5_g3_i1::g.87007::m.87007 [type:complete len:229 gc:universal SRR7980_TRINITY_DN17784_c5_g3_i1:1177-1863(+)]	type:complete len:226 gc:universal SRR7914_TRINITY_DN29835_c9_g1_i4:1274-597(-)	SRR7914_TRINITY_DN29835_c9_g1::SRR7914_TRINITY_DN29835_c9_g1_i4::g.21701::m.21701	IS_216438_Aes_Skin_Mucus_lane_Pann_DB	0.99	0.000213652	1	1	6	0.257778	26 kDa
SRR7914_TRINITY_DN28925_c0_g3::SRR7914_TRINITY_DN28925_c0_g3_i1::g.22413::m.22413 [type:complete len:130 gc:universal SRR7914_TRINITY_DN28925_c0_g3_i1:4137-3748(-)]	type:complete len:144 gc:universal SRR7978_TRINITY_DN7200_c0_g1_i1:530-99(-)	SRR7978_TRINITY_DN7200_c0_g1::SRR7978_TRINITY_DN7200_c0_g1_i1::g.36258::m.36258	IS_216438_Aes_Skin_Mucus_lane_Pann_DB	1	0.00117509	1	1	33	0.272727	15 kDa
SRR8021_TRINITY_DN20797_c0_g1::SRR8021_TRINITY_DN20797_c0_g1_i1::g.154628::m.154628 [type:complete len:398 gc:universal SRR8021_TRINITY_DN20797_c0_g1_i1:460-1653(+)]	type:complete len:398 gc:universal SRR1329_TRINITY_DN356076_c1_g1_i1:136-1329(+)	SRR1329_TRINITY_DN356076_c1_g1::SRR1329_TRINITY_DN356076_c1_g1_i1::g.183363::m.183363	IS_216438_Aes_Skin_Mucus_lane_Pann_DB	1	0.000142435	1	1	4	0.11335	42 kDa
SRR7980_TRINITY_DN17956_c7_g4::SRR7980_TRINITY_DN17956_c7_g4_i2::g.83166::m.83166 [type:complete len:251 gc:universal SRR7980_TRINITY_DN17956_c7_g4_i2:1766-1014(-)]	type:5prime_partial len:388 gc:universal SRR1329_TRINITY_DN353618_c1_g1_i1:2-1165(+)	SRR1329_TRINITY_DN353618_c1_g1::SRR1329_TRINITY_DN353618_c1_g1_i1::g.182240::m.182240	IS_216438_Aes_Skin_Mucus_lane_Pann_DB	1	0.00145996	1	1	41	0.421189	43 kDa
SRR7979_TRINITY_DN3722_c0_g1::SRR7979_TRINITY_DN3722_c0_g1_i1::g.63392::m.63392 [type:complete len:263 gc:universal SRR7979_TRINITY_DN3722_c0_g1_i1:243-1031(+)]	type:5prime_partial len:186 gc:universal SRR1330_TRINITY_DN113110_c0_g1_i2:609-52(-)	SRR1330_TRINITY_DN113110_c0_g1::SRR1330_TRINITY_DN113110_c0_g1_i2::g.253378::m.253378	IS_216438_Aes_Skin_Mucus_lane_Pann_DB	0.99	0.000106826	1	1	3	0.145946	21 kDa
sp|ALBU_BOVIN| [sp|ALBU_BOVIN|]	sp|ALBU_BOVIN|	sp|ALBU_BOVIN|	IS_216438_Pdol9_C_band_Pann_DB	1	0.0347284	59	108	390	0.833608	69 kDa
SRR7978_TRINITY_DN14411_c1_g1::SRR7978_TRINITY_DN14411_c1_g1_i2::g.31295::m.31295 [type:5prime_partial len:252 gc:universal SRR7978_TRINITY_DN14411_c1_g1_i2:1674-919(-)]	type:5prime_partial len:252 gc:universal SRR7978_TRINITY_DN14411_c1_g1_i2:1674-919(-)	SRR7978_TRINITY_DN14411_c1_g1::SRR7978_TRINITY_DN14411_c1_g1_i2::g.31295::m.31295	IS_216438_Pdol9_C_band_Pann_DB	1	0.0062333	18	33	70	0.697211	28 kDa
sp|K2C1_HUMAN| [sp|K2C1_HUMAN|]	sp|K2C1_HUMAN|	sp|K2C1_HUMAN|	IS_216438_Pdol9_C_band_Pann_DB	1	0.00605521	29	36	68	0.477449	66 kDa
sp|K1C9_HUMAN| [sp|K1C9_HUMAN|]	sp|K1C9_HUMAN|	sp|K1C9_HUMAN|	IS_216438_Pdol9_C_band_Pann_DB	1	0.00409617	21	32	46	0.494382	62 kDa
sp|K1C10_HUMAN| [sp|K1C10_HUMAN|]	sp|K1C10_HUMAN|	sp|K1C10_HUMAN|	IS_216438_Pdol9_C_band_Pann_DB	1	0.00195904	12	12	22	0.318718	60 kDa
SRR7978_TRINITY_DN14411_c1_g3::SRR7978_TRINITY_DN14411_c1_g3_i1::g.31296::m.31296 [type:internal len:171 gc:universal SRR7978_TRINITY_DN14411_c1_g3_i1:3-512(+)]	type:internal len:171 gc:universal SRR7978_TRINITY_DN14411_c1_g3_i1:3-512(+)	SRR7978_TRINITY_DN14411_c1_g3::SRR7978_TRINITY_DN14411_c1_g3_i1::g.31296::m.31296	IS_216438_Pdol9_C_band_Pann_DB	1	0.00347284	16	24	39	0.776471	19 kDa
sp|K22E_HUMAN| [sp|K22E_HUMAN|]	sp|K22E_HUMAN|	sp|K22E_HUMAN|	IS_216438_Pdol9_C_band_Pann_DB	1	0.00142476	8	8	16	0.213953	66 kDa
sp|TRYP_PIG| [sp|TRYP_PIG|]	sp|TRYP_PIG|	sp|TRYP_PIG|	IS_216438_Pdol9_C_band_Pann_DB	1	0.000712378	2	3	8	0.0779221	24 kDa
SRR7979_TRINITY_DN18586_c1_g3::SRR7979_TRINITY_DN18586_c1_g3_i1::g.60315::m.60315 [type:complete len:615 gc:universal SRR7979_TRINITY_DN18586_c1_g3_i1:321-2165(+)]	type:complete len:706 gc:universal SRR1330_TRINITY_DN122622_c11_g1_i10:2271-154(-)	SRR1330_TRINITY_DN122622_c11_g1::SRR1330_TRINITY_DN122622_c11_g1_i10::g.217406::m.217406	IS_216438_Pdol9_C_band_Pann_DB	1	0.00178094	16	18	20	0.310638	79 kDa
SRR1330_TRINITY_DN124479_c0_g1::SRR1330_TRINITY_DN124479_c0_g1_i6::g.230241::m.230241 [type:complete len:686 gc:universal SRR1330_TRINITY_DN124479_c0_g1_i6:2245-188(-)]	type:complete len:686 gc:universal SRR1330_TRINITY_DN124479_c0_g1_i6:2245-188(-)	SRR1330_TRINITY_DN124479_c0_g1::SRR1330_TRINITY_DN124479_c0_g1_i6::g.230241::m.230241	IS_216438_Pdol9_C_band_Pann_DB	1	0.000445236	4	4	5	0.0686131	77 kDa
SRR8000_TRINITY_DN20528_c0_g1::SRR8000_TRINITY_DN20528_c0_g1_i1::g.99850::m.99850 [type:complete len:436 gc:universal SRR8000_TRINITY_DN20528_c0_g1_i1:264-1571(+)]	type:complete len:436 gc:universal SRR8000_TRINITY_DN20528_c0_g1_i1:264-1571(+)	SRR8000_TRINITY_DN20528_c0_g1::SRR8000_TRINITY_DN20528_c0_g1_i1::g.99850::m.99850	IS_216438_Pdol9_C_band_Pann_DB	1	0.000712378	7	7	8	0.222989	47 kDa
SRR8017_TRINITY_DN25002_c7_g2::SRR8017_TRINITY_DN25002_c7_g2_i7::g.121404::m.121404 [type:complete len:857 gc:universal SRR8017_TRINITY_DN25002_c7_g2_i7:5780-3210(-)]	type:complete len:857 gc:universal SRR8017_TRINITY_DN25002_c7_g2_i7:5780-3210(-)	SRR8017_TRINITY_DN25002_c7_g2::SRR8017_TRINITY_DN25002_c7_g2_i7::g.121404::m.121404	IS_216438_Pdol9_C_band_Pann_DB	1	0.000534283	4	4	6	0.0817757	96 kDa
SRR7978_TRINITY_DN19466_c0_g1::SRR7978_TRINITY_DN19466_c0_g1_i1::g.44911::m.44911 [type:5prime_partial len:158 gc:universal SRR7978_TRINITY_DN19466_c0_g1_i1:1-474(+)]	type:5prime_partial len:158 gc:universal SRR7978_TRINITY_DN19466_c0_g1_i1:1-474(+)	SRR7978_TRINITY_DN19466_c0_g1::SRR7978_TRINITY_DN19466_c0_g1_i1::g.44911::m.44911	IS_216438_Pdol9_C_band_Pann_DB	1	0.00463045	14	18	52	0.834395	17 kDa
SRR1330_TRINITY_DN110493_c0_g1::SRR1330_TRINITY_DN110493_c0_g1_i2::g.250426::m.250426 [type:complete len:339 gc:universal SRR1330_TRINITY_DN110493_c0_g1_i2:92-1108(+)]	type:complete len:339 gc:universal SRR1330_TRINITY_DN110493_c0_g1_i2:92-1108(+)	SRR1330_TRINITY_DN110493_c0_g1::SRR1330_TRINITY_DN110493_c0_g1_i2::g.250426::m.250426	IS_216438_Pdol9_C_band_Pann_DB	1	0.000801425	9	9	9	0.292899	38 kDa
SRR1330_TRINITY_DN116543_c0_g1::SRR1330_TRINITY_DN116543_c0_g1_i2::g.206660::m.206660 [type:5prime_partial len:349 gc:universal SRR1330_TRINITY_DN116543_c0_g1_i2:1969-923(-)]	type:5prime_partial len:349 gc:universal SRR1330_TRINITY_DN116543_c0_g1_i2:1969-923(-)	SRR1330_TRINITY_DN116543_c0_g1::SRR1330_TRINITY_DN116543_c0_g1_i2::g.206660::m.206660	IS_216438_Pdol9_C_band_Pann_DB	1	0.000979519	3	3	11	0.143678	39 kDa
SRR1330_TRINITY_DN119139_c0_g1::SRR1330_TRINITY_DN119139_c0_g1_i1::g.245444::m.245444 [type:complete len:342 gc:universal SRR1330_TRINITY_DN119139_c0_g1_i1:61-1086(+)]	type:5prime_partial len:483 gc:universal SRR1330_TRINITY_DN119139_c0_g1_i13:3-1451(+)	SRR1330_TRINITY_DN119139_c0_g1::SRR1330_TRINITY_DN119139_c0_g1_i13::g.245446::m.245446	IS_216438_Pdol9_C_band_Pann_DB	1	0.00436331	16	26	49	0.479253	54 kDa
SRR7978_TRINITY_DN11304_c0_g1::SRR7978_TRINITY_DN11304_c0_g1_i2::g.33775::m.33775 [type:internal len:215 gc:universal SRR7978_TRINITY_DN11304_c0_g1_i2:1-642(+)]	type:internal len:215 gc:universal SRR7978_TRINITY_DN11304_c0_g1_i2:1-642(+)	SRR7978_TRINITY_DN11304_c0_g1::SRR7978_TRINITY_DN11304_c0_g1_i2::g.33775::m.33775	IS_216438_Pdol9_C_band_Pann_DB	1	0.00293856	8	18	33	0.439252	23 kDa
SRR7978_TRINITY_DN19183_c1_g1::SRR7978_TRINITY_DN19183_c1_g1_i1::g.37650::m.37650 [type:complete len:154 gc:universal SRR7978_TRINITY_DN19183_c1_g1_i1:320-781(+)]	type:complete len:154 gc:universal SRR7978_TRINITY_DN19183_c1_g1_i1:320-781(+)	SRR7978_TRINITY_DN19183_c1_g1::SRR7978_TRINITY_DN19183_c1_g1_i1::g.37650::m.37650	IS_216438_Pdol9_C_band_Pann_DB	1	0.000178094	2	2	2	0.202614	17 kDa
SRR7979_TRINITY_DN17616_c0_g6::SRR7979_TRINITY_DN17616_c0_g6_i6::g.64668::m.64668 [type:complete len:658 gc:universal SRR7979_TRINITY_DN17616_c0_g6_i6:2570-4543(+)]	type:complete len:658 gc:universal SRR7979_TRINITY_DN17616_c0_g6_i6:2570-4543(+)	SRR7979_TRINITY_DN17616_c0_g6::SRR7979_TRINITY_DN17616_c0_g6_i6::g.64668::m.64668	IS_216438_Pdol9_C_band_Pann_DB	1	0.000979519	7	8	11	0.164384	73 kDa
SRR7980_TRINITY_DN18145_c1_g1::SRR7980_TRINITY_DN18145_c1_g1_i5::g.75541::m.75541 [type:complete len:507 gc:universal SRR7980_TRINITY_DN18145_c1_g1_i5:275-1795(+)]	type:complete len:507 gc:universal SRR1330_TRINITY_DN117089_c0_g1_i6:139-1659(+)	SRR1330_TRINITY_DN117089_c0_g1::SRR1330_TRINITY_DN117089_c0_g1_i6::g.225077::m.225077	IS_216438_Pdol9_C_band_Pann_DB	1	0.00195904	18	21	22	0.365613	57 kDa
SRR7914_TRINITY_DN28680_c0_g1::SRR7914_TRINITY_DN28680_c0_g1_i2::g.14784::m.14784 [type:internal len:501 gc:universal SRR7914_TRINITY_DN28680_c0_g1_i2:3-1502(+)]	type:internal len:501 gc:universal SRR7914_TRINITY_DN28680_c0_g1_i2:3-1502(+)	SRR7914_TRINITY_DN28680_c0_g1::SRR7914_TRINITY_DN28680_c0_g1_i2::g.14784::m.14784	IS_216438_Pdol9_C_band_Pann_DB	1	0.0108638	6	10	122	0.56	53 kDa
SRR7914_TRINITY_DN28680_c0_g1::SRR7914_TRINITY_DN28680_c0_g1_i2::g.14784::m.14784 [type:internal len:501 gc:universal SRR7914_TRINITY_DN28680_c0_g1_i2:3-1502(+)]	type:complete len:350 gc:universal SRR7980_TRINITY_DN19221_c2_g4_i1:175-1224(+)	SRR7980_TRINITY_DN19221_c2_g4::SRR7980_TRINITY_DN19221_c2_g4_i1::g.76688::m.76688	IS_216438_Pdol9_C_band_Pann_DB	1	0.00899377	4	6	101	0.636103	38 kDa
SRR8017_TRINITY_DN74840_c0_g1::SRR8017_TRINITY_DN74840_c0_g1_i1::g.116240::m.116240 [type:3prime_partial len:117 gc:universal SRR8017_TRINITY_DN74840_c0_g1_i1:349-2(-)]	type:3prime_partial len:117 gc:universal SRR8017_TRINITY_DN74840_c0_g1_i1:349-2(-)	SRR8017_TRINITY_DN74840_c0_g1::SRR8017_TRINITY_DN74840_c0_g1_i1::g.116240::m.116240	IS_216438_Pdol9_C_band_Pann_DB	1	0.000445236	3	4	5	0.336207	13 kDa
SRR7978_TRINITY_DN11440_c0_g1::SRR7978_TRINITY_DN11440_c0_g1_i1::g.32770::m.32770 [type:complete len:338 gc:universal SRR7978_TRINITY_DN11440_c0_g1_i1:669-1682(+)]	type:complete len:338 gc:universal SRR7978_TRINITY_DN11440_c0_g1_i1:669-1682(+)	SRR7978_TRINITY_DN11440_c0_g1::SRR7978_TRINITY_DN11440_c0_g1_i1::g.32770::m.32770	IS_216438_Pdol9_C_band_Pann_DB	1	0.000267142	3	3	3	0.11276	38 kDa
SRR1330_TRINITY_DN118385_c7_g1::SRR1330_TRINITY_DN118385_c7_g1_i1::g.244778::m.244778 [type:internal len:914 gc:universal SRR1330_TRINITY_DN118385_c7_g1_i1:1-2739(+)]	type:internal len:914 gc:universal SRR1330_TRINITY_DN118385_c7_g1_i1:1-2739(+)	SRR1330_TRINITY_DN118385_c7_g1::SRR1330_TRINITY_DN118385_c7_g1_i1::g.244778::m.244778	IS_216438_Pdol9_C_band_Pann_DB	1	0.000801425	9	9	9	0.121577	101 kDa
SRR7978_TRINITY_DN18255_c6_g2::SRR7978_TRINITY_DN18255_c6_g2_i1::g.38397::m.38397 [type:complete len:498 gc:universal SRR7978_TRINITY_DN18255_c6_g2_i1:1796-303(-)]	type:complete len:498 gc:universal SRR7978_TRINITY_DN18255_c6_g2_i1:1796-303(-)	SRR7978_TRINITY_DN18255_c6_g2::SRR7978_TRINITY_DN18255_c6_g2_i1::g.38397::m.38397	IS_216438_Pdol9_C_band_Pann_DB	1	0.00115761	9	10	13	0.273642	56 kDa
SRR7980_TRINITY_DN18156_c4_g2::SRR7980_TRINITY_DN18156_c4_g2_i1::g.75303::m.75303 [type:complete len:1767 gc:universal SRR7980_TRINITY_DN18156_c4_g2_i1:208-5508(+)]	type:complete len:1767 gc:universal SRR7980_TRINITY_DN18156_c4_g2_i1:208-5508(+)	SRR7980_TRINITY_DN18156_c4_g2::SRR7980_TRINITY_DN18156_c4_g2_i1::g.75303::m.75303	IS_216438_Pdol9_C_band_Pann_DB	1	0.000178094	1	1	2	0.0107588	208 kDa
SRR7914_TRINITY_DN29665_c3_g6::SRR7914_TRINITY_DN29665_c3_g6_i1::g.7308::m.7308 [type:complete len:365 gc:universal SRR7914_TRINITY_DN29665_c3_g6_i1:350-1444(+)]	type:complete len:365 gc:universal SRR7914_TRINITY_DN29665_c3_g6_i1:350-1444(+)	SRR7914_TRINITY_DN29665_c3_g6::SRR7914_TRINITY_DN29665_c3_g6_i1::g.7308::m.7308	IS_216438_Pdol9_C_band_Pann_DB	1	0.000356189	4	4	4	0.167582	40 kDa
SRR7914_TRINITY_DN32362_c3_g4::SRR7914_TRINITY_DN32362_c3_g4_i2::g.2808::m.2808 [type:complete len:556 gc:universal SRR7914_TRINITY_DN32362_c3_g4_i2:342-2009(+)]	type:complete len:556 gc:universal SRR7914_TRINITY_DN32362_c3_g4_i2:342-2009(+)	SRR7914_TRINITY_DN32362_c3_g4::SRR7914_TRINITY_DN32362_c3_g4_i2::g.2808::m.2808	IS_216438_Pdol9_C_band_Pann_DB	1	0.00213713	11	15	24	0.302703	62 kDa
SRR8000_TRINITY_DN21637_c2_g3::SRR8000_TRINITY_DN21637_c2_g3_i3::g.100440::m.100440 [type:complete len:615 gc:universal SRR8000_TRINITY_DN21637_c2_g3_i3:3262-1418(-)]	type:complete len:615 gc:universal SRR8000_TRINITY_DN21637_c2_g3_i3:3262-1418(-)	SRR8000_TRINITY_DN21637_c2_g3::SRR8000_TRINITY_DN21637_c2_g3_i3::g.100440::m.100440	IS_216438_Pdol9_C_band_Pann_DB	1	0.00204809	18	19	23	0.410423	69 kDa
SRR7978_TRINITY_DN14411_c0_g1::SRR7978_TRINITY_DN14411_c0_g1_i1::g.31294::m.31294 [type:3prime_partial len:100 gc:universal SRR7978_TRINITY_DN14411_c0_g1_i1:297-1(-)]	type:3prime_partial len:100 gc:universal SRR7978_TRINITY_DN14411_c0_g1_i1:297-1(-)	SRR7978_TRINITY_DN14411_c0_g1::SRR7978_TRINITY_DN14411_c0_g1_i1::g.31294::m.31294	IS_216438_Pdol9_C_band_Pann_DB	1	0.00124666	8	12	14	0.50505	11 kDa
SRR1330_TRINITY_DN124323_c1_g1::SRR1330_TRINITY_DN124323_c1_g1_i1::g.210647::m.210647 [type:5prime_partial len:348 gc:universal SRR1330_TRINITY_DN124323_c1_g1_i1:1288-245(-)]	type:5prime_partial len:348 gc:universal SRR1330_TRINITY_DN124323_c1_g1_i1:1288-245(-)	SRR1330_TRINITY_DN124323_c1_g1::SRR1330_TRINITY_DN124323_c1_g1_i1::g.210647::m.210647	IS_216438_Pdol9_C_band_Pann_DB	1	0.00160285	13	14	18	0.455331	40 kDa
SRR7979_TRINITY_DN16842_c3_g1::SRR7979_TRINITY_DN16842_c3_g1_i2::g.56019::m.56019 [type:complete len:165 gc:universal SRR7979_TRINITY_DN16842_c3_g1_i2:1297-1791(+)]	type:5prime_partial len:167 gc:universal SRR1329_TRINITY_DN355037_c7_g2_i11:704-204(-)	SRR1329_TRINITY_DN355037_c7_g2::SRR1329_TRINITY_DN355037_c7_g2_i11::g.184116::m.184116	IS_216438_Pdol9_C_band_Pann_DB	1	0.000356189	3	3	4	0.228916	19 kDa
SRR8017_TRINITY_DN6677_c0_g1::SRR8017_TRINITY_DN6677_c0_g1_i1::g.113437::m.113437 [type:complete len:106 gc:universal SRR8017_TRINITY_DN6677_c0_g1_i1:371-688(+)]	type:complete len:106 gc:universal SRR8017_TRINITY_DN6677_c0_g1_i1:371-688(+)	SRR8017_TRINITY_DN6677_c0_g1::SRR8017_TRINITY_DN6677_c0_g1_i1::g.113437::m.113437	IS_216438_Pdol9_C_band_Pann_DB	1	0.000178094	2	2	2	0.180952	12 kDa
SRR7979_TRINITY_DN17952_c2_g2::SRR7979_TRINITY_DN17952_c2_g2_i1::g.59106::m.59106 [type:5prime_partial len:504 gc:universal SRR7979_TRINITY_DN17952_c2_g2_i1:5079-3568(-)]	type:complete len:699 gc:universal SRR7980_TRINITY_DN18546_c2_g1_i11:281-2377(+)	SRR7980_TRINITY_DN18546_c2_g1::SRR7980_TRINITY_DN18546_c2_g1_i11::g.84759::m.84759	IS_216438_Pdol9_C_band_Pann_DB	1	0.000267142	3	3	3	0.0573066	78 kDa
SRR7978_TRINITY_DN39042_c0_g1::SRR7978_TRINITY_DN39042_c0_g1_i1::g.39245::m.39245 [type:internal len:116 gc:universal SRR7978_TRINITY_DN39042_c0_g1_i1:1-345(+)]	type:internal len:116 gc:universal SRR7978_TRINITY_DN39042_c0_g1_i1:1-345(+)	SRR7978_TRINITY_DN39042_c0_g1::SRR7978_TRINITY_DN39042_c0_g1_i1::g.39245::m.39245	IS_216438_Pdol9_C_band_Pann_DB	1	0.00106857	3	7	12	0.486957	12 kDa
SRR1330_TRINITY_DN120245_c11_g3::SRR1330_TRINITY_DN120245_c11_g3_i1::g.211565::m.211565 [type:complete len:574 gc:universal SRR1330_TRINITY_DN120245_c11_g3_i1:2111-390(-)]	type:complete len:574 gc:universal SRR1330_TRINITY_DN120245_c11_g3_i1:2111-390(-)	SRR1330_TRINITY_DN120245_c11_g3::SRR1330_TRINITY_DN120245_c11_g3_i1::g.211565::m.211565	IS_216438_Pdol9_C_band_Pann_DB	1	0.000356189	4	4	4	0.0890052	61 kDa
SRR1330_TRINITY_DN124323_c2_g2::SRR1330_TRINITY_DN124323_c2_g2_i3::g.210651::m.210651 [type:5prime_partial len:486 gc:universal SRR1330_TRINITY_DN124323_c2_g2_i3:3-1460(+)]	type:internal len:107 gc:universal SRR1330_TRINITY_DN124323_c2_g3_i2:318-1(-)	SRR1330_TRINITY_DN124323_c2_g3::SRR1330_TRINITY_DN124323_c2_g3_i2::g.210659::m.210659	IS_216438_Pdol9_C_band_Pann_DB	1	0.00133571	7	12	15	0.877359	12 kDa
SRR8017_TRINITY_DN26574_c4_g4::SRR8017_TRINITY_DN26574_c4_g4_i2::g.116904::m.116904 [type:complete len:455 gc:universal SRR8017_TRINITY_DN26574_c4_g4_i2:766-2130(+)]	type:complete len:455 gc:universal SRR8017_TRINITY_DN26574_c4_g4_i2:766-2130(+)	SRR8017_TRINITY_DN26574_c4_g4::SRR8017_TRINITY_DN26574_c4_g4_i2::g.116904::m.116904	IS_216438_Pdol9_C_band_Pann_DB	1	0.000356189	3	3	4	0.0881057	51 kDa
SRR1330_TRINITY_DN103436_c0_g1::SRR1330_TRINITY_DN103436_c0_g1_i1::g.224133::m.224133 [type:complete len:322 gc:universal SRR1330_TRINITY_DN103436_c0_g1_i1:291-1256(+)]	type:complete len:322 gc:universal SRR1330_TRINITY_DN103436_c0_g1_i1:291-1256(+)	SRR1330_TRINITY_DN103436_c0_g1::SRR1330_TRINITY_DN103436_c0_g1_i1::g.224133::m.224133	IS_216438_Pdol9_C_band_Pann_DB	1	0.000178094	2	2	2	0.0841121	36 kDa
SRR1330_TRINITY_DN157030_c0_g1::SRR1330_TRINITY_DN157030_c0_g1_i1::g.221227::m.221227 [type:3prime_partial len:599 gc:universal SRR1330_TRINITY_DN157030_c0_g1_i1:138-1931(+)]	type:3prime_partial len:599 gc:universal SRR1330_TRINITY_DN157030_c0_g1_i1:138-1931(+)	SRR1330_TRINITY_DN157030_c0_g1::SRR1330_TRINITY_DN157030_c0_g1_i1::g.221227::m.221227	IS_216438_Pdol9_C_band_Pann_DB	1	0.000445236	5	5	5	0.113712	64 kDa
SRR7914_TRINITY_DN32228_c4_g2::SRR7914_TRINITY_DN32228_c4_g2_i3::g.20275::m.20275 [type:complete len:655 gc:universal SRR7914_TRINITY_DN32228_c4_g2_i3:2501-537(-)]	type:complete len:903 gc:universal SRR8020_TRINITY_DN28917_c0_g1_i2:351-3059(+)	SRR8020_TRINITY_DN28917_c0_g1::SRR8020_TRINITY_DN28917_c0_g1_i2::g.147803::m.147803	IS_216438_Pdol9_C_band_Pann_DB	1	0.000178094	0	0	2	0.0299335	104 kDa
SRR1330_TRINITY_DN124323_c2_g2::SRR1330_TRINITY_DN124323_c2_g2_i8::g.210657::m.210657 [type:internal len:381 gc:universal SRR1330_TRINITY_DN124323_c2_g2_i8:3-1142(+)]	type:3prime_partial len:155 gc:universal SRR8020_TRINITY_DN80519_c0_g1_i1:211-672(+)	SRR8020_TRINITY_DN80519_c0_g1::SRR8020_TRINITY_DN80519_c0_g1_i1::g.130757::m.130757	IS_216438_Pdol9_C_band_Pann_DB	1	0.00231523	7	13	26	0.714286	17 kDa
SRR7978_TRINITY_DN18459_c0_g1::SRR7978_TRINITY_DN18459_c0_g1_i1::g.35666::m.35666 [type:complete len:554 gc:universal SRR7978_TRINITY_DN18459_c0_g1_i1:376-2037(+)]	type:complete len:554 gc:universal SRR7978_TRINITY_DN18459_c0_g1_i1:376-2037(+)	SRR7978_TRINITY_DN18459_c0_g1::SRR7978_TRINITY_DN18459_c0_g1_i1::g.35666::m.35666	IS_216438_Pdol9_C_band_Pann_DB	1	0.000801425	7	7	9	0.189873	60 kDa
SRR8017_TRINITY_DN25757_c4_g1::SRR8017_TRINITY_DN25757_c4_g1_i3::g.118578::m.118578 [type:complete len:706 gc:universal SRR8017_TRINITY_DN25757_c4_g1_i3:80-2197(+)]	type:complete len:706 gc:universal SRR8017_TRINITY_DN25757_c4_g1_i3:80-2197(+)	SRR8017_TRINITY_DN25757_c4_g1::SRR8017_TRINITY_DN25757_c4_g1_i3::g.118578::m.118578	IS_216438_Pdol9_C_band_Pann_DB	1	0.000267142	1	1	3	0.0468085	78 kDa
SRR1330_TRINITY_DN115695_c12_g1::SRR1330_TRINITY_DN115695_c12_g1_i4::g.239330::m.239330 [type:5prime_partial len:226 gc:universal SRR1330_TRINITY_DN115695_c12_g1_i4:1099-422(-)]	type:5prime_partial len:226 gc:universal SRR1330_TRINITY_DN115695_c12_g1_i4:1099-422(-)	SRR1330_TRINITY_DN115695_c12_g1::SRR1330_TRINITY_DN115695_c12_g1_i4::g.239330::m.239330	IS_216438_Pdol9_C_band_Pann_DB	1	0.000356189	3	4	4	0.195556	25 kDa
SRR1329_TRINITY_DN341817_c10_g1::SRR1329_TRINITY_DN341817_c10_g1_i23::g.166403::m.166403 [type:5prime_partial len:266 gc:universal SRR1329_TRINITY_DN341817_c10_g1_i23:1-798(+)]	type:complete len:487 gc:universal SRR7979_TRINITY_DN17602_c1_g2_i1:245-1705(+)	SRR7979_TRINITY_DN17602_c1_g2::SRR7979_TRINITY_DN17602_c1_g2_i1::g.64557::m.64557	IS_216438_Pdol9_C_band_Pann_DB	1	0.0015138	10	15	17	0.277778	51 kDa
SRR7978_TRINITY_DN18621_c1_g1::SRR7978_TRINITY_DN18621_c1_g1_i1::g.32073::m.32073 [type:complete len:252 gc:universal SRR7978_TRINITY_DN18621_c1_g1_i1:3198-2443(-)]	type:complete len:252 gc:universal SRR7978_TRINITY_DN18621_c1_g1_i1:3198-2443(-)	SRR7978_TRINITY_DN18621_c1_g1::SRR7978_TRINITY_DN18621_c1_g1_i1::g.32073::m.32073	IS_216438_Pdol9_C_band_Pann_DB	1	0.000534283	3	3	6	0.219124	28 kDa
SRR8017_TRINITY_DN26300_c0_g1::SRR8017_TRINITY_DN26300_c0_g1_i8::g.112678::m.112678 [type:complete len:148 gc:universal SRR8017_TRINITY_DN26300_c0_g1_i8:730-287(-)]	type:complete len:148 gc:universal SRR8021_TRINITY_DN19914_c0_g1_i2:122-565(+)	SRR8021_TRINITY_DN19914_c0_g1::SRR8021_TRINITY_DN19914_c0_g1_i2::g.160471::m.160471	IS_216438_Pdol9_C_band_Pann_DB	1	0.00115761	4	7	13	0.666667	16 kDa
SRR1330_TRINITY_DN230844_c0_g1::SRR1330_TRINITY_DN230844_c0_g1_i1::g.269195::m.269195 [type:internal len:195 gc:universal SRR1330_TRINITY_DN230844_c0_g1_i1:584-3(-)]	type:internal len:195 gc:universal SRR1330_TRINITY_DN230844_c0_g1_i1:584-3(-)	SRR1330_TRINITY_DN230844_c0_g1::SRR1330_TRINITY_DN230844_c0_g1_i1::g.269195::m.269195	IS_216438_Pdol9_C_band_Pann_DB	1	0.000356189	4	4	4	0.247423	21 kDa
SRR7980_TRINITY_DN13938_c0_g1::SRR7980_TRINITY_DN13938_c0_g1_i1::g.78805::m.78805 [type:complete len:165 gc:universal SRR7980_TRINITY_DN13938_c0_g1_i1:794-300(-)]	type:complete len:165 gc:universal SRR7980_TRINITY_DN13938_c0_g1_i1:794-300(-)	SRR7980_TRINITY_DN13938_c0_g1::SRR7980_TRINITY_DN13938_c0_g1_i1::g.78805::m.78805	IS_216438_Pdol9_C_band_Pann_DB	1	0.000178094	2	2	2	0.134146	18 kDa
SRR8020_TRINITY_DN29026_c3_g1::SRR8020_TRINITY_DN29026_c3_g1_i3::g.139507::m.139507 [type:complete len:250 gc:universal SRR8020_TRINITY_DN29026_c3_g1_i3:495-1244(+)]	type:complete len:250 gc:universal SRR8020_TRINITY_DN29026_c3_g1_i3:495-1244(+)	SRR8020_TRINITY_DN29026_c3_g1::SRR8020_TRINITY_DN29026_c3_g1_i3::g.139507::m.139507	IS_216438_Pdol9_C_band_Pann_DB	1	0.000534283	2	2	6	0.257028	28 kDa
SRR8017_TRINITY_DN19637_c0_g1::SRR8017_TRINITY_DN19637_c0_g1_i1::g.108320::m.108320 [type:complete len:338 gc:universal SRR8017_TRINITY_DN19637_c0_g1_i1:206-1219(+)]	type:complete len:338 gc:universal SRR8017_TRINITY_DN19637_c0_g1_i1:206-1219(+)	SRR8017_TRINITY_DN19637_c0_g1::SRR8017_TRINITY_DN19637_c0_g1_i1::g.108320::m.108320	IS_216438_Pdol9_C_band_Pann_DB	1	0.000712378	5	6	8	0.264095	38 kDa
SRR7978_TRINITY_DN18673_c0_g4::SRR7978_TRINITY_DN18673_c0_g4_i8::g.32435::m.32435 [type:complete len:472 gc:universal SRR7978_TRINITY_DN18673_c0_g4_i8:2995-1580(-)]	type:complete len:472 gc:universal SRR7978_TRINITY_DN18673_c0_g4_i8:2995-1580(-)	SRR7978_TRINITY_DN18673_c0_g4::SRR7978_TRINITY_DN18673_c0_g4_i8::g.32435::m.32435	IS_216438_Pdol9_C_band_Pann_DB	1	0.00062333	7	7	7	0.242038	51 kDa
SRR8017_TRINITY_DN26300_c0_g1::SRR8017_TRINITY_DN26300_c0_g1_i9::g.112680::m.112680 [type:complete len:148 gc:universal SRR8017_TRINITY_DN26300_c0_g1_i9:762-319(-)]	type:complete len:148 gc:universal SRR8017_TRINITY_DN26300_c0_g1_i9:762-319(-)	SRR8017_TRINITY_DN26300_c0_g1::SRR8017_TRINITY_DN26300_c0_g1_i9::g.112680::m.112680	IS_216438_Pdol9_C_band_Pann_DB	1	0.000979519	4	5	11	0.646259	16 kDa
SRR7980_TRINITY_DN12577_c0_g1::SRR7980_TRINITY_DN12577_c0_g1_i2::g.91912::m.91912 [type:complete len:177 gc:universal SRR7980_TRINITY_DN12577_c0_g1_i2:254-784(+)]	type:complete len:177 gc:universal SRR7980_TRINITY_DN12577_c0_g1_i2:254-784(+)	SRR7980_TRINITY_DN12577_c0_g1::SRR7980_TRINITY_DN12577_c0_g1_i2::g.91912::m.91912	IS_216438_Pdol9_C_band_Pann_DB	1	0.000445236	2	2	5	0.136364	20 kDa
SRR7914_TRINITY_DN32278_c0_g1::SRR7914_TRINITY_DN32278_c0_g1_i2::g.20346::m.20346 [type:complete len:338 gc:universal SRR7914_TRINITY_DN32278_c0_g1_i2:184-1197(+)]	type:complete len:338 gc:universal SRR7914_TRINITY_DN32278_c0_g1_i2:184-1197(+)	SRR7914_TRINITY_DN32278_c0_g1::SRR7914_TRINITY_DN32278_c0_g1_i2::g.20346::m.20346	IS_216438_Pdol9_C_band_Pann_DB	1	0.000178094	2	2	2	0.0682493	38 kDa
SRR8000_TRINITY_DN20943_c0_g1::SRR8000_TRINITY_DN20943_c0_g1_i7::g.96835::m.96835 [type:complete len:883 gc:universal SRR8000_TRINITY_DN20943_c0_g1_i7:7881-5233(-)]	type:complete len:936 gc:universal SRR7979_TRINITY_DN16473_c0_g1_i1:654-3461(+)	SRR7979_TRINITY_DN16473_c0_g1::SRR7979_TRINITY_DN16473_c0_g1_i1::g.68957::m.68957	IS_216438_Pdol9_C_band_Pann_DB	1	0.000267142	3	3	3	0.0513369	105 kDa
SRR7979_TRINITY_DN16692_c0_g1::SRR7979_TRINITY_DN16692_c0_g1_i1::g.46052::m.46052 [type:complete len:608 gc:universal SRR7979_TRINITY_DN16692_c0_g1_i1:2431-608(-)]	type:complete len:608 gc:universal SRR7979_TRINITY_DN16692_c0_g1_i1:2431-608(-)	SRR7979_TRINITY_DN16692_c0_g1::SRR7979_TRINITY_DN16692_c0_g1_i1::g.46052::m.46052	IS_216438_Pdol9_C_band_Pann_DB	0.99	0.000178094	2	2	2	0.0494234	66 kDa
SRR7978_TRINITY_DN19890_c6_g1::SRR7978_TRINITY_DN19890_c6_g1_i1::g.36705::m.36705 [type:complete len:177 gc:universal SRR7978_TRINITY_DN19890_c6_g1_i1:605-75(-)]	type:complete len:177 gc:universal SRR7978_TRINITY_DN19890_c6_g1_i1:605-75(-)	SRR7978_TRINITY_DN19890_c6_g1::SRR7978_TRINITY_DN19890_c6_g1_i1::g.36705::m.36705	IS_216438_Pdol9_C_band_Pann_DB	1	0.000178094	2	2	2	0.0965909	20 kDa
SRR1330_TRINITY_DN113623_c0_g1::SRR1330_TRINITY_DN113623_c0_g1_i1::g.255960::m.255960 [type:5prime_partial len:201 gc:universal SRR1330_TRINITY_DN113623_c0_g1_i1:845-243(-)]	type:5prime_partial len:201 gc:universal SRR1330_TRINITY_DN113623_c0_g1_i1:845-243(-)	SRR1330_TRINITY_DN113623_c0_g1::SRR1330_TRINITY_DN113623_c0_g1_i1::g.255960::m.255960	IS_216438_Pdol9_C_band_Pann_DB	1	0.000178094	2	2	2	0.1	22 kDa
SRR7980_TRINITY_DN18792_c4_g2::SRR7980_TRINITY_DN18792_c4_g2_i1::g.79454::m.79454 [type:complete len:109 gc:universal SRR7980_TRINITY_DN18792_c4_g2_i1:146-472(+)]	type:complete len:109 gc:universal SRR7980_TRINITY_DN18792_c4_g2_i1:146-472(+)	SRR7980_TRINITY_DN18792_c4_g2::SRR7980_TRINITY_DN18792_c4_g2_i1::g.79454::m.79454	IS_216438_Pdol9_C_band_Pann_DB	1	0.000267142	2	3	3	0.268518	12 kDa
SRR1330_TRINITY_DN119139_c0_g1::SRR1330_TRINITY_DN119139_c0_g1_i1::g.245444::m.245444 [type:complete len:342 gc:universal SRR1330_TRINITY_DN119139_c0_g1_i1:61-1086(+)]	type:5prime_partial len:483 gc:universal SRR1330_TRINITY_DN119139_c0_g1_i14:3-1451(+)	SRR1330_TRINITY_DN119139_c0_g1::SRR1330_TRINITY_DN119139_c0_g1_i14::g.245447::m.245447	IS_216438_Pdol9_C_band_Pann_DB	1	0.00534283	8	10	60	0.53527	54 kDa
SRR7979_TRINITY_DN17762_c4_g3::SRR7979_TRINITY_DN17762_c4_g3_i3::g.62933::m.62933 [type:complete len:245 gc:universal SRR7979_TRINITY_DN17762_c4_g3_i3:2738-2004(-)]	type:complete len:245 gc:universal SRR7979_TRINITY_DN17762_c4_g3_i3:2738-2004(-)	SRR7979_TRINITY_DN17762_c4_g3::SRR7979_TRINITY_DN17762_c4_g3_i3::g.62933::m.62933	IS_216438_Pdol9_C_band_Pann_DB	1	0.000445236	1	1	5	0.131148	28 kDa
SRR7980_TRINITY_DN19533_c1_g1::SRR7980_TRINITY_DN19533_c1_g1_i10::g.90352::m.90352 [type:complete len:638 gc:universal SRR7980_TRINITY_DN19533_c1_g1_i10:193-2106(+)]	type:complete len:638 gc:universal SRR7980_TRINITY_DN19533_c1_g1_i10:193-2106(+)	SRR7980_TRINITY_DN19533_c1_g1::SRR7980_TRINITY_DN19533_c1_g1_i10::g.90352::m.90352	IS_216438_Pdol9_C_band_Pann_DB	1	0.00062333	4	4	7	0.125589	70 kDa
SRR8020_TRINITY_DN30092_c0_g1::SRR8020_TRINITY_DN30092_c0_g1_i7::g.122208::m.122208 [type:complete len:131 gc:universal SRR8020_TRINITY_DN30092_c0_g1_i7:2629-3021(+)]	type:5prime_partial len:192 gc:universal SRR1329_TRINITY_DN354944_c3_g1_i6:697-122(-)	SRR1329_TRINITY_DN354944_c3_g1::SRR1329_TRINITY_DN354944_c3_g1_i6::g.184249::m.184249	IS_216438_Pdol9_C_band_Pann_DB	1	0.000267142	1	1	3	0.13089	20 kDa
SRR8017_TRINITY_DN25957_c5_g1::SRR8017_TRINITY_DN25957_c5_g1_i1::g.119706::m.119706 [type:complete len:726 gc:universal SRR8017_TRINITY_DN25957_c5_g1_i1:132-2309(+)]	type:complete len:726 gc:universal SRR8017_TRINITY_DN25957_c5_g1_i1:132-2309(+)	SRR8017_TRINITY_DN25957_c5_g1::SRR8017_TRINITY_DN25957_c5_g1_i1::g.119706::m.119706	IS_216438_Pdol9_C_band_Pann_DB	1	0.000534283	1	1	6	0.121379	80 kDa
SRR7979_TRINITY_DN16633_c0_g1::SRR7979_TRINITY_DN16633_c0_g1_i1::g.46114::m.46114 [type:complete len:522 gc:universal SRR7979_TRINITY_DN16633_c0_g1_i1:163-1728(+)]	type:complete len:522 gc:universal SRR7979_TRINITY_DN16633_c0_g1_i1:163-1728(+)	SRR7979_TRINITY_DN16633_c0_g1::SRR7979_TRINITY_DN16633_c0_g1_i1::g.46114::m.46114	IS_216438_Pdol9_C_band_Pann_DB	1	0.000267142	2	2	3	0.0806142	56 kDa
SRR7914_TRINITY_DN31168_c3_g1::SRR7914_TRINITY_DN31168_c3_g1_i6::g.16456::m.16456 [type:complete len:407 gc:universal SRR7914_TRINITY_DN31168_c3_g1_i6:344-1564(+)]	type:complete len:434 gc:universal SRR7979_TRINITY_DN16899_c0_g1_i6:331-1632(+)	SRR7979_TRINITY_DN16899_c0_g1::SRR7979_TRINITY_DN16899_c0_g1_i6::g.56127::m.56127	IS_216438_Pdol9_C_band_Pann_DB	1	0.0015138	11	13	17	0.364896	48 kDa
SRR7914_TRINITY_DN30369_c2_g2::SRR7914_TRINITY_DN30369_c2_g2_i9::g.8016::m.8016 [type:complete len:107 gc:universal SRR7914_TRINITY_DN30369_c2_g2_i9:531-211(-)]	type:complete len:107 gc:universal SRR7914_TRINITY_DN30369_c2_g2_i9:531-211(-)	SRR7914_TRINITY_DN30369_c2_g2::SRR7914_TRINITY_DN30369_c2_g2_i9::g.8016::m.8016	IS_216438_Pdol9_C_band_Pann_DB	1	0.000445236	4	4	5	0.424528	12 kDa
SRR7980_TRINITY_DN19481_c4_g4::SRR7980_TRINITY_DN19481_c4_g4_i1::g.93885::m.93885 [type:complete len:418 gc:universal SRR7980_TRINITY_DN19481_c4_g4_i1:1914-661(-)]	type:complete len:418 gc:universal SRR7980_TRINITY_DN19481_c4_g4_i1:1914-661(-)	SRR7980_TRINITY_DN19481_c4_g4::SRR7980_TRINITY_DN19481_c4_g4_i1::g.93885::m.93885	IS_216438_Pdol9_C_band_Pann_DB	1	0.000356189	1	1	4	0.1247	45 kDa
SRR7914_TRINITY_DN32294_c0_g1::SRR7914_TRINITY_DN32294_c0_g1_i7::g.20034::m.20034 [type:complete len:146 gc:universal SRR7914_TRINITY_DN32294_c0_g1_i7:5797-6234(+)]	type:complete len:512 gc:universal SRR7979_TRINITY_DN18976_c0_g1_i4:138-1673(+)	SRR7979_TRINITY_DN18976_c0_g1::SRR7979_TRINITY_DN18976_c0_g1_i4::g.56799::m.56799	IS_216438_Pdol9_C_band_Pann_DB	1	0.000178094	2	2	2	0.0508806	58 kDa
SRR7914_TRINITY_DN41065_c0_g1::SRR7914_TRINITY_DN41065_c0_g1_i1::g.23775::m.23775 [type:complete len:228 gc:universal SRR7914_TRINITY_DN41065_c0_g1_i1:903-220(-)]	type:complete len:228 gc:universal SRR7914_TRINITY_DN41065_c0_g1_i1:903-220(-)	SRR7914_TRINITY_DN41065_c0_g1::SRR7914_TRINITY_DN41065_c0_g1_i1::g.23775::m.23775	IS_216438_Pdol9_C_band_Pann_DB	1	0.000267142	3	3	3	0.136564	26 kDa
SRR7979_TRINITY_DN19369_c5_g5::SRR7979_TRINITY_DN19369_c5_g5_i1::g.63820::m.63820 [type:complete len:309 gc:universal SRR7979_TRINITY_DN19369_c5_g5_i1:267-1193(+)]	type:complete len:324 gc:universal SRR7979_TRINITY_DN17453_c4_g1_i1:233-1204(+)	SRR7979_TRINITY_DN17453_c4_g1::SRR7979_TRINITY_DN17453_c4_g1_i1::g.57794::m.57794	IS_216438_Pdol9_C_band_Pann_DB	1	0.000178094	1	1	2	0.0681115	36 kDa
SRR8017_TRINITY_DN26300_c0_g1::SRR8017_TRINITY_DN26300_c0_g1_i8::g.112678::m.112678 [type:complete len:148 gc:universal SRR8017_TRINITY_DN26300_c0_g1_i8:730-287(-)]	type:complete len:148 gc:universal SRR8017_TRINITY_DN26300_c0_g1_i8:730-287(-)	SRR8017_TRINITY_DN26300_c0_g1::SRR8017_TRINITY_DN26300_c0_g1_i8::g.112678::m.112678	IS_216438_Pdol9_C_band_Pann_DB	1	0.000534283	3	3	6	0.44898	16 kDa
SRR8017_TRINITY_DN50016_c0_g1::SRR8017_TRINITY_DN50016_c0_g1_i1::g.102936::m.102936 [type:internal len:122 gc:universal SRR8017_TRINITY_DN50016_c0_g1_i1:3-365(+)]	type:internal len:122 gc:universal SRR8017_TRINITY_DN50016_c0_g1_i1:3-365(+)	SRR8017_TRINITY_DN50016_c0_g1::SRR8017_TRINITY_DN50016_c0_g1_i1::g.102936::m.102936	IS_216438_Pdol9_C_band_Pann_DB	1	0.000534283	2	4	6	0.22314	13 kDa
SRR8017_TRINITY_DN23242_c0_g1::SRR8017_TRINITY_DN23242_c0_g1_i2::g.120380::m.120380 [type:5prime_partial len:434 gc:universal SRR8017_TRINITY_DN23242_c0_g1_i2:1-1302(+)]	type:5prime_partial len:434 gc:universal SRR8017_TRINITY_DN23242_c0_g1_i2:1-1302(+)	SRR8017_TRINITY_DN23242_c0_g1::SRR8017_TRINITY_DN23242_c0_g1_i2::g.120380::m.120380	IS_216438_Pdol9_C_band_Pann_DB	1	0.000445236	4	4	5	0.127021	47 kDa
SRR7914_TRINITY_DN32156_c0_g1::SRR7914_TRINITY_DN32156_c0_g1_i3::g.24129::m.24129 [type:internal len:158 gc:universal SRR7914_TRINITY_DN32156_c0_g1_i3:1-471(+)]	type:internal len:1043 gc:universal SRR8021_TRINITY_DN20117_c0_g1_i10:1-3126(+)	SRR8021_TRINITY_DN20117_c0_g1::SRR8021_TRINITY_DN20117_c0_g1_i10::g.159482::m.159482	IS_216438_Pdol9_C_band_Pann_DB	1	0.000356189	4	4	4	0.0479846	108 kDa
SRR1330_TRINITY_DN124323_c2_g2::SRR1330_TRINITY_DN124323_c2_g2_i7::g.210654::m.210654 [type:5prime_partial len:328 gc:universal SRR1330_TRINITY_DN124323_c2_g2_i7:3-986(+)]	type:5prime_partial len:328 gc:universal SRR1330_TRINITY_DN124323_c2_g2_i7:3-986(+)	SRR1330_TRINITY_DN124323_c2_g2::SRR1330_TRINITY_DN124323_c2_g2_i7::g.210654::m.210654	IS_216438_Pdol9_C_band_Pann_DB	1	0.0032057	6	13	36	0.495413	35 kDa
sp|PRDX1_HUMAN| [sp|PRDX1_HUMAN|]	type:complete len:199 gc:universal SRR7979_TRINITY_DN15409_c0_g1_i1:1062-466(-)	SRR7979_TRINITY_DN15409_c0_g1::SRR7979_TRINITY_DN15409_c0_g1_i1::g.54749::m.54749	IS_216438_Pdol9_C_band_Pann_DB	1	0.000267142	3	3	3	0.186869	22 kDa
SRR7914_TRINITY_DN31560_c4_g2::SRR7914_TRINITY_DN31560_c4_g2_i3::g.9700::m.9700 [type:complete len:473 gc:universal SRR7914_TRINITY_DN31560_c4_g2_i3:69-1487(+)]	type:complete len:473 gc:universal SRR7914_TRINITY_DN31560_c4_g2_i3:69-1487(+)	SRR7914_TRINITY_DN31560_c4_g2::SRR7914_TRINITY_DN31560_c4_g2_i3::g.9700::m.9700	IS_216438_Pdol9_C_band_Pann_DB	1	0.000890472	7	9	10	0.235169	46 kDa
SRR8017_TRINITY_DN24885_c0_g1::SRR8017_TRINITY_DN24885_c0_g1_i1::g.106192::m.106192 [type:complete len:333 gc:universal SRR8017_TRINITY_DN24885_c0_g1_i1:214-1212(+)]	type:complete len:333 gc:universal SRR8017_TRINITY_DN24885_c0_g1_i1:214-1212(+)	SRR8017_TRINITY_DN24885_c0_g1::SRR8017_TRINITY_DN24885_c0_g1_i1::g.106192::m.106192	IS_216438_Pdol9_C_band_Pann_DB	1	0.000445236	4	5	5	0.129518	36 kDa
SRR8017_TRINITY_DN24701_c6_g4::SRR8017_TRINITY_DN24701_c6_g4_i1::g.119068::m.119068 [type:complete len:413 gc:universal SRR8017_TRINITY_DN24701_c6_g4_i1:218-1456(+)]	type:complete len:413 gc:universal SRR8017_TRINITY_DN24701_c6_g4_i1:218-1456(+)	SRR8017_TRINITY_DN24701_c6_g4::SRR8017_TRINITY_DN24701_c6_g4_i1::g.119068::m.119068	IS_216438_Pdol9_C_band_Pann_DB	1	0.00115761	7	8	13	0.279126	48 kDa
SRR8000_TRINITY_DN26888_c0_g1::SRR8000_TRINITY_DN26888_c0_g1_i1::g.97289::m.97289 [type:complete len:459 gc:universal SRR8000_TRINITY_DN26888_c0_g1_i1:1541-165(-)]	type:complete len:459 gc:universal SRR8000_TRINITY_DN26888_c0_g1_i1:1541-165(-)	SRR8000_TRINITY_DN26888_c0_g1::SRR8000_TRINITY_DN26888_c0_g1_i1::g.97289::m.97289	IS_216438_Pdol9_C_band_Pann_DB	1	0.00142476	12	12	16	0.342795	51 kDa
SRR1330_TRINITY_DN120434_c0_g1::SRR1330_TRINITY_DN120434_c0_g1_i2::g.255521::m.255521 [type:complete len:521 gc:universal SRR1330_TRINITY_DN120434_c0_g1_i2:290-1852(+)]	type:complete len:521 gc:universal SRR1330_TRINITY_DN120434_c0_g1_i2:290-1852(+)	SRR1330_TRINITY_DN120434_c0_g1::SRR1330_TRINITY_DN120434_c0_g1_i2::g.255521::m.255521	IS_216438_Pdol9_C_band_Pann_DB	1	0.00409617	2	4	46	0.5	56 kDa
SRR7979_TRINITY_DN18638_c0_g6::SRR7979_TRINITY_DN18638_c0_g6_i1::g.53919::m.53919 [type:complete len:272 gc:universal SRR7979_TRINITY_DN18638_c0_g6_i1:225-1040(+)]	type:complete len:272 gc:universal SRR7979_TRINITY_DN18638_c0_g6_i1:225-1040(+)	SRR7979_TRINITY_DN18638_c0_g6::SRR7979_TRINITY_DN18638_c0_g6_i1::g.53919::m.53919	IS_216438_Pdol9_C_band_Pann_DB	1	0.000178094	2	2	2	0.0922509	29 kDa
SRR7914_TRINITY_DN32035_c9_g1::SRR7914_TRINITY_DN32035_c9_g1_i3::g.12362::m.12362 [type:complete len:231 gc:universal SRR7914_TRINITY_DN32035_c9_g1_i3:823-131(-)]	type:complete len:231 gc:universal SRR7914_TRINITY_DN32035_c9_g1_i3:823-131(-)	SRR7914_TRINITY_DN32035_c9_g1::SRR7914_TRINITY_DN32035_c9_g1_i3::g.12362::m.12362	IS_216438_Pdol9_C_band_Pann_DB	1	0.000267142	2	2	3	0.143478	26 kDa
SRR1330_TRINITY_DN113424_c0_g1::SRR1330_TRINITY_DN113424_c0_g1_i1::g.247034::m.247034 [type:internal len:375 gc:universal SRR1330_TRINITY_DN113424_c0_g1_i1:3-1124(+)]	type:internal len:375 gc:universal SRR1330_TRINITY_DN113424_c0_g1_i1:3-1124(+)	SRR1330_TRINITY_DN113424_c0_g1::SRR1330_TRINITY_DN113424_c0_g1_i1::g.247034::m.247034	IS_216438_Pdol9_C_band_Pann_DB	1	0.00160285	5	6	18	0.256684	42 kDa
SRR1329_TRINITY_DN350756_c1_g2::SRR1329_TRINITY_DN350756_c1_g2_i14::g.175634::m.175634 [type:internal len:537 gc:universal SRR1329_TRINITY_DN350756_c1_g2_i14:3-1610(+)]	type:complete len:374 gc:universal SRR7914_TRINITY_DN29692_c1_g1_i3:23-1144(+)	SRR7914_TRINITY_DN29692_c1_g1::SRR7914_TRINITY_DN29692_c1_g1_i3::g.7493::m.7493	IS_216438_Pdol9_C_band_Pann_DB	1	0.000178094	2	2	2	0.077748	42 kDa
SRR1329_TRINITY_DN349975_c3_g1::SRR1329_TRINITY_DN349975_c3_g1_i9::g.192566::m.192566 [type:complete len:546 gc:universal SRR1329_TRINITY_DN349975_c3_g1_i9:1876-239(-)]	type:complete len:546 gc:universal SRR1329_TRINITY_DN349975_c3_g1_i9:1876-239(-)	SRR1329_TRINITY_DN349975_c3_g1::SRR1329_TRINITY_DN349975_c3_g1_i9::g.192566::m.192566	IS_216438_Pdol9_C_band_Pann_DB	1	0.000356189	2	2	4	0.0990826	59 kDa
SRR7980_TRINITY_DN19278_c0_g1::SRR7980_TRINITY_DN19278_c0_g1_i5::g.76850::m.76850 [type:complete len:333 gc:universal SRR7980_TRINITY_DN19278_c0_g1_i5:1277-279(-)]	type:complete len:333 gc:universal SRR7980_TRINITY_DN19278_c0_g1_i5:1277-279(-)	SRR7980_TRINITY_DN19278_c0_g1::SRR7980_TRINITY_DN19278_c0_g1_i5::g.76850::m.76850	IS_216438_Pdol9_C_band_Pann_DB	1	0.00062333	1	1	7	0.126506	37 kDa
SRR7978_TRINITY_DN19827_c1_g3::SRR7978_TRINITY_DN19827_c1_g3_i1::g.36789::m.36789 [type:complete len:581 gc:universal SRR7978_TRINITY_DN19827_c1_g3_i1:127-1869(+)]	type:complete len:581 gc:universal SRR7978_TRINITY_DN19827_c1_g3_i1:127-1869(+)	SRR7978_TRINITY_DN19827_c1_g3::SRR7978_TRINITY_DN19827_c1_g3_i1::g.36789::m.36789	IS_216438_Pdol9_C_band_Pann_DB	1	0.000178094	2	2	2	0.0431035	63 kDa
SRR8017_TRINITY_DN25834_c0_g1::SRR8017_TRINITY_DN25834_c0_g1_i5::g.107158::m.107158 [type:5prime_partial len:740 gc:universal SRR8017_TRINITY_DN25834_c0_g1_i5:2-2221(+)]	type:5prime_partial len:267 gc:universal SRR7979_TRINITY_DN15096_c2_g1_i2:2-802(+)	SRR7979_TRINITY_DN15096_c2_g1::SRR7979_TRINITY_DN15096_c2_g1_i2::g.61392::m.61392	IS_216438_Pdol9_C_band_Pann_DB	1	0.000178094	1	1	2	0.0676692	30 kDa
SRR7980_TRINITY_DN18080_c3_g1::SRR7980_TRINITY_DN18080_c3_g1_i1::g.92347::m.92347 [type:complete len:418 gc:universal SRR7980_TRINITY_DN18080_c3_g1_i1:178-1431(+)]	type:5prime_partial len:376 gc:universal SRR1329_TRINITY_DN336048_c1_g1_i4:1-1128(+)	SRR1329_TRINITY_DN336048_c1_g1::SRR1329_TRINITY_DN336048_c1_g1_i4::g.195271::m.195271	IS_216438_Pdol9_C_band_Pann_DB	1	0.00106857	9	9	12	0.336	44 kDa
SRR1330_TRINITY_DN124682_c0_g1::SRR1330_TRINITY_DN124682_c0_g1_i7::g.242691::m.242691 [type:complete len:394 gc:universal SRR1330_TRINITY_DN124682_c0_g1_i7:167-1348(+)]	type:5prime_partial len:119 gc:universal SRR1330_TRINITY_DN124682_c0_g1_i2:1-357(+)	SRR1330_TRINITY_DN124682_c0_g1::SRR1330_TRINITY_DN124682_c0_g1_i2::g.242687::m.242687	IS_216438_Pdol9_C_band_Pann_DB	1	0.000534283	2	2	6	0.542373	13 kDa
SRR7980_TRINITY_DN19547_c2_g1::SRR7980_TRINITY_DN19547_c2_g1_i8::g.90484::m.90484 [type:complete len:416 gc:universal SRR7980_TRINITY_DN19547_c2_g1_i8:3625-4872(+)]	type:complete len:416 gc:universal SRR7978_TRINITY_DN16902_c0_g1_i1:443-1690(+)	SRR7978_TRINITY_DN16902_c0_g1::SRR7978_TRINITY_DN16902_c0_g1_i1::g.38934::m.38934	IS_216438_Pdol9_C_band_Pann_DB	1	0.000445236	5	5	5	0.115663	47 kDa
SRR1330_TRINITY_DN124323_c2_g2::SRR1330_TRINITY_DN124323_c2_g2_i8::g.210657::m.210657 [type:internal len:381 gc:universal SRR1330_TRINITY_DN124323_c2_g2_i8:3-1142(+)]	type:complete len:458 gc:universal SRR8021_TRINITY_DN19108_c0_g1_i1:1966-593(-)	SRR8021_TRINITY_DN19108_c0_g1::SRR8021_TRINITY_DN19108_c0_g1_i1::g.158603::m.158603	IS_216438_Pdol9_C_band_Pann_DB	1	0.00231523	4	4	26	0.256018	50 kDa
SRR8000_TRINITY_DN21633_c1_g2::SRR8000_TRINITY_DN21633_c1_g2_i4::g.100407::m.100407 [type:complete len:466 gc:universal SRR8000_TRINITY_DN21633_c1_g2_i4:977-2374(+)]	type:complete len:466 gc:universal SRR8000_TRINITY_DN21633_c1_g2_i4:977-2374(+)	SRR8000_TRINITY_DN21633_c1_g2::SRR8000_TRINITY_DN21633_c1_g2_i4::g.100407::m.100407	IS_216438_Pdol9_C_band_Pann_DB	1	0.00106857	7	9	12	0.182796	53 kDa
SRR7979_TRINITY_DN17355_c0_g1::SRR7979_TRINITY_DN17355_c0_g1_i2::g.66722::m.66722 [type:complete len:392 gc:universal SRR7979_TRINITY_DN17355_c0_g1_i2:1653-478(-)]	type:complete len:390 gc:universal SRR7978_TRINITY_DN20192_c1_g1_i7:1639-470(-)	SRR7978_TRINITY_DN20192_c1_g1::SRR7978_TRINITY_DN20192_c1_g1_i7::g.40128::m.40128	IS_216438_Pdol9_C_band_Pann_DB	1	0.000445236	2	2	5	0.195373	43 kDa
SRR8021_TRINITY_DN21462_c0_g1::SRR8021_TRINITY_DN21462_c0_g1_i9::g.152453::m.152453 [type:complete len:433 gc:universal SRR8021_TRINITY_DN21462_c0_g1_i9:2445-1147(-)]	type:complete len:420 gc:universal SRR7914_TRINITY_DN32603_c0_g1_i3:216-1475(+)	SRR7914_TRINITY_DN32603_c0_g1::SRR7914_TRINITY_DN32603_c0_g1_i3::g.3301::m.3301	IS_216438_Pdol9_C_band_Pann_DB	1	0.000178094	2	2	2	0.0501193	45 kDa
SRR8017_TRINITY_DN20722_c0_g1::SRR8017_TRINITY_DN20722_c0_g1_i1::g.109217::m.109217 [type:complete len:466 gc:universal SRR8017_TRINITY_DN20722_c0_g1_i1:235-1632(+)]	type:complete len:466 gc:universal SRR8017_TRINITY_DN20722_c0_g1_i1:235-1632(+)	SRR8017_TRINITY_DN20722_c0_g1::SRR8017_TRINITY_DN20722_c0_g1_i1::g.109217::m.109217	IS_216438_Pdol9_C_band_Pann_DB	1	0.000178094	2	2	2	0.0236559	52 kDa
SRR1330_TRINITY_DN123435_c2_g2::SRR1330_TRINITY_DN123435_c2_g2_i1::g.224489::m.224489 [type:internal len:121 gc:universal SRR1330_TRINITY_DN123435_c2_g2_i1:362-3(-)]	type:internal len:121 gc:universal SRR1330_TRINITY_DN123435_c2_g2_i1:362-3(-)	SRR1330_TRINITY_DN123435_c2_g2::SRR1330_TRINITY_DN123435_c2_g2_i1::g.224489::m.224489	IS_216438_Pdol9_C_band_Pann_DB	1	0.000445236	4	4	5	0.516667	14 kDa
SRR7979_TRINITY_DN27794_c0_g1::SRR7979_TRINITY_DN27794_c0_g1_i1::g.50134::m.50134 [type:internal len:206 gc:universal SRR7979_TRINITY_DN27794_c0_g1_i1:2-616(+)]	type:complete len:394 gc:universal SRR1330_TRINITY_DN124682_c0_g1_i7:167-1348(+)	SRR1330_TRINITY_DN124682_c0_g1::SRR1330_TRINITY_DN124682_c0_g1_i7::g.242691::m.242691	IS_216438_Pdol9_C_band_Pann_DB	1	0.00329475	4	4	37	0.506361	45 kDa
SRR7914_TRINITY_DN28335_c0_g1::SRR7914_TRINITY_DN28335_c0_g1_i1::g.913::m.913 [type:complete len:419 gc:universal SRR7914_TRINITY_DN28335_c0_g1_i1:1230-2486(+)]	type:complete len:419 gc:universal SRR7914_TRINITY_DN28335_c0_g1_i1:1230-2486(+)	SRR7914_TRINITY_DN28335_c0_g1::SRR7914_TRINITY_DN28335_c0_g1_i1::g.913::m.913	IS_216438_Pdol9_C_band_Pann_DB	1	0.000178094	2	2	2	0.0598086	46 kDa
SRR7978_TRINITY_DN19499_c3_g1::SRR7978_TRINITY_DN19499_c3_g1_i1::g.44861::m.44861 [type:complete len:106 gc:universal SRR7978_TRINITY_DN19499_c3_g1_i1:177-494(+)]	type:complete len:106 gc:universal SRR7978_TRINITY_DN19499_c3_g1_i1:177-494(+)	SRR7978_TRINITY_DN19499_c3_g1::SRR7978_TRINITY_DN19499_c3_g1_i1::g.44861::m.44861	IS_216438_Pdol9_C_band_Pann_DB	1	0.000267142	0	0	3	0.276191	12 kDa
SRR7914_TRINITY_DN30749_c2_g9::SRR7914_TRINITY_DN30749_c2_g9_i3::g.4831::m.4831 [type:complete len:359 gc:universal SRR7914_TRINITY_DN30749_c2_g9_i3:2087-1011(-)]	type:5prime_partial len:505 gc:universal SRR7980_TRINITY_DN17791_c2_g2_i1:3-1517(+)	SRR7980_TRINITY_DN17791_c2_g2::SRR7980_TRINITY_DN17791_c2_g2_i1::g.87179::m.87179	IS_216438_Pdol9_C_band_Pann_DB	1	0.000534283	1	1	6	0.126984	56 kDa
SRR7980_TRINITY_DN18796_c3_g3::SRR7980_TRINITY_DN18796_c3_g3_i4::g.79448::m.79448 [type:complete len:441 gc:universal SRR7980_TRINITY_DN18796_c3_g3_i4:261-1583(+)]	type:complete len:441 gc:universal SRR7980_TRINITY_DN18796_c3_g3_i4:261-1583(+)	SRR7980_TRINITY_DN18796_c3_g3::SRR7980_TRINITY_DN18796_c3_g3_i4::g.79448::m.79448	IS_216438_Pdol9_C_band_Pann_DB	1	0.000890472	1	1	10	0.120455	49 kDa
SRR7979_TRINITY_DN16544_c0_g1::SRR7979_TRINITY_DN16544_c0_g1_i1::g.63751::m.63751 [type:complete len:480 gc:universal SRR7979_TRINITY_DN16544_c0_g1_i1:314-1753(+)]	type:3prime_partial len:457 gc:universal SRR1330_TRINITY_DN121337_c0_g1_i1:128-1495(+)	SRR1330_TRINITY_DN121337_c0_g1::SRR1330_TRINITY_DN121337_c0_g1_i1::g.253499::m.253499	IS_216438_Pdol9_C_band_Pann_DB	1	0.000178094	2	2	2	0.0570175	54 kDa
SRR7978_TRINITY_DN39042_c0_g1::SRR7978_TRINITY_DN39042_c0_g1_i1::g.39245::m.39245 [type:internal len:116 gc:universal SRR7978_TRINITY_DN39042_c0_g1_i1:1-345(+)]	type:internal len:140 gc:universal SRR8017_TRINITY_DN36970_c0_g1_i1:3-419(+)	SRR8017_TRINITY_DN36970_c0_g1::SRR8017_TRINITY_DN36970_c0_g1_i1::g.116481::m.116481	IS_216438_Pdol9_C_band_Pann_DB	1	0.00062333	1	1	7	0.402878	14 kDa
SRR7914_TRINITY_DN28570_c0_g1::SRR7914_TRINITY_DN28570_c0_g1_i1::g.17508::m.17508 [type:complete len:143 gc:universal SRR7914_TRINITY_DN28570_c0_g1_i1:506-934(+)]	type:complete len:143 gc:universal SRR7914_TRINITY_DN28570_c0_g1_i1:506-934(+)	SRR7914_TRINITY_DN28570_c0_g1::SRR7914_TRINITY_DN28570_c0_g1_i1::g.17508::m.17508	IS_216438_Pdol9_C_band_Pann_DB	1	0.000178094	2	2	2	0.140845	16 kDa
SRR7978_TRINITY_DN16392_c0_g4::SRR7978_TRINITY_DN16392_c0_g4_i1::g.26060::m.26060 [type:complete len:252 gc:universal SRR7978_TRINITY_DN16392_c0_g4_i1:730-1485(+)]	type:complete len:252 gc:universal SRR7978_TRINITY_DN16392_c0_g4_i1:730-1485(+)	SRR7978_TRINITY_DN16392_c0_g4::SRR7978_TRINITY_DN16392_c0_g4_i1::g.26060::m.26060	IS_216438_Pdol9_C_band_Pann_DB	1	0.000178094	2	2	2	0.151394	28 kDa
sp|K1C15_SHEEP| [sp|K1C15_SHEEP|]	sp|K1C15_SHEEP|	sp|K1C15_SHEEP|	IS_216438_Pdol9_C_band_Pann_DB	1	0.000979519	2	2	11	0.101545	49 kDa
SRR8017_TRINITY_DN26941_c1_g1::SRR8017_TRINITY_DN26941_c1_g1_i5::g.110049::m.110049 [type:complete len:465 gc:universal SRR8017_TRINITY_DN26941_c1_g1_i5:1739-345(-)]	type:complete len:465 gc:universal SRR8017_TRINITY_DN26941_c1_g1_i5:1739-345(-)	SRR8017_TRINITY_DN26941_c1_g1::SRR8017_TRINITY_DN26941_c1_g1_i5::g.110049::m.110049	IS_216438_Pdol9_C_band_Pann_DB	1	0.000267142	1	1	3	0.0711207	54 kDa
SRR7914_TRINITY_DN29645_c0_g1::SRR7914_TRINITY_DN29645_c0_g1_i2::g.7475::m.7475 [type:complete len:422 gc:universal SRR7914_TRINITY_DN29645_c0_g1_i2:118-1383(+)]	type:complete len:422 gc:universal SRR7914_TRINITY_DN29645_c0_g1_i2:118-1383(+)	SRR7914_TRINITY_DN29645_c0_g1::SRR7914_TRINITY_DN29645_c0_g1_i2::g.7475::m.7475	IS_216438_Pdol9_C_band_Pann_DB	1	0.00062333	6	6	7	0.168646	48 kDa
SRR1330_TRINITY_DN113371_c0_g1::SRR1330_TRINITY_DN113371_c0_g1_i1::g.234509::m.234509 [type:internal len:224 gc:universal SRR1330_TRINITY_DN113371_c0_g1_i1:671-3(-)]	type:internal len:224 gc:universal SRR1330_TRINITY_DN113371_c0_g1_i1:671-3(-)	SRR1330_TRINITY_DN113371_c0_g1::SRR1330_TRINITY_DN113371_c0_g1_i1::g.234509::m.234509	IS_216438_Pdol9_C_band_Pann_DB	1	0.000178094	2	2	2	0.0807175	25 kDa
SRR7979_TRINITY_DN19175_c2_g2::SRR7979_TRINITY_DN19175_c2_g2_i4::g.61265::m.61265 [type:complete len:300 gc:universal SRR7979_TRINITY_DN19175_c2_g2_i4:709-1608(+)]	type:5prime_partial len:325 gc:universal SRR1330_TRINITY_DN114753_c0_g1_i1:1286-312(-)	SRR1330_TRINITY_DN114753_c0_g1::SRR1330_TRINITY_DN114753_c0_g1_i1::g.240641::m.240641	IS_216438_Pdol9_C_band_Pann_DB	1	0.000534283	0	0	6	0.151235	36 kDa
SRR8000_TRINITY_DN21742_c5_g3::SRR8000_TRINITY_DN21742_c5_g3_i2::g.94495::m.94495 [type:5prime_partial len:428 gc:universal SRR8000_TRINITY_DN21742_c5_g3_i2:2-1285(+)]	type:complete len:510 gc:universal SRR8021_TRINITY_DN21280_c0_g1_i2:279-1808(+)	SRR8021_TRINITY_DN21280_c0_g1::SRR8021_TRINITY_DN21280_c0_g1_i2::g.157531::m.157531	IS_216438_Pdol9_C_band_Pann_DB	1	0.000356189	4	4	4	0.0923379	56 kDa
SRR7914_TRINITY_DN32385_c2_g2::SRR7914_TRINITY_DN32385_c2_g2_i1::g.2746::m.2746 [type:5prime_partial len:662 gc:universal SRR7914_TRINITY_DN32385_c2_g2_i1:2-1987(+)]	type:complete len:654 gc:universal SRR7980_TRINITY_DN19405_c1_g1_i13:3066-1105(-)	SRR7980_TRINITY_DN19405_c1_g1::SRR7980_TRINITY_DN19405_c1_g1_i13::g.93839::m.93839	IS_216438_Pdol9_C_band_Pann_DB	1	0.000178094	2	2	2	0.0382848	73 kDa
SRR7980_TRINITY_DN17137_c0_g1::SRR7980_TRINITY_DN17137_c0_g1_i1::g.74336::m.74336 [type:complete len:558 gc:universal SRR7980_TRINITY_DN17137_c0_g1_i1:242-1915(+)]	type:complete len:558 gc:universal SRR7980_TRINITY_DN17137_c0_g1_i1:242-1915(+)	SRR7980_TRINITY_DN17137_c0_g1::SRR7980_TRINITY_DN17137_c0_g1_i1::g.74336::m.74336	IS_216438_Pdol9_C_band_Pann_DB	1	0.000267142	3	3	3	0.0682226	63 kDa
SRR7914_TRINITY_DN31559_c5_g1::SRR7914_TRINITY_DN31559_c5_g1_i3::g.9389::m.9389 [type:complete len:112 gc:universal SRR7914_TRINITY_DN31559_c5_g1_i3:538-203(-)]	type:5prime_partial len:153 gc:universal SRR7914_TRINITY_DN31559_c5_g1_i7:1334-876(-)	SRR7914_TRINITY_DN31559_c5_g1::SRR7914_TRINITY_DN31559_c5_g1_i7::g.9391::m.9391	IS_216438_Pdol9_C_band_Pann_DB	1	0.000267142	1	1	3	0.236842	17 kDa
SRR7914_TRINITY_DN32116_c0_g1::SRR7914_TRINITY_DN32116_c0_g1_i12::g.24117::m.24117 [type:complete len:563 gc:universal SRR7914_TRINITY_DN32116_c0_g1_i12:3209-1521(-)]	type:complete len:563 gc:universal SRR7979_TRINITY_DN17618_c0_g2_i8:320-2008(+)	SRR7979_TRINITY_DN17618_c0_g2::SRR7979_TRINITY_DN17618_c0_g2_i8::g.64533::m.64533	IS_216438_Pdol9_C_band_Pann_DB	1	0.000712378	5	5	8	0.163701	63 kDa
sp|ALBU_BOVIN| [sp|ALBU_BOVIN|]	sp|ALBU_HUMAN|	sp|ALBU_HUMAN|	IS_216438_Pdol9_C_band_Pann_DB	1	0.00258237	2	2	29	0.101806	69 kDa
SRR1330_TRINITY_DN55115_c0_g1::SRR1330_TRINITY_DN55115_c0_g1_i1::g.263365::m.263365 [type:internal len:101 gc:universal SRR1330_TRINITY_DN55115_c0_g1_i1:300-1(-)]	type:internal len:101 gc:universal SRR1330_TRINITY_DN55115_c0_g1_i1:300-1(-)	SRR1330_TRINITY_DN55115_c0_g1::SRR1330_TRINITY_DN55115_c0_g1_i1::g.263365::m.263365	IS_216438_Pdol9_C_band_Pann_DB	1	0.000178094	2	2	2	0.38	11 kDa
SRR1330_TRINITY_DN116866_c6_g1::SRR1330_TRINITY_DN116866_c6_g1_i2::g.234747::m.234747 [type:internal len:292 gc:universal SRR1330_TRINITY_DN116866_c6_g1_i2:873-1(-)]	type:internal len:292 gc:universal SRR1330_TRINITY_DN116866_c6_g1_i2:873-1(-)	SRR1330_TRINITY_DN116866_c6_g1::SRR1330_TRINITY_DN116866_c6_g1_i2::g.234747::m.234747	IS_216438_Pdol9_C_band_Pann_DB	0.99	0.000178094	1	1	2	0.0962199	32 kDa
SRR7978_TRINITY_DN18882_c1_g1::SRR7978_TRINITY_DN18882_c1_g1_i1::g.34546::m.34546 [type:complete len:230 gc:universal SRR7978_TRINITY_DN18882_c1_g1_i1:1331-642(-)]	type:complete len:210 gc:universal SRR1330_TRINITY_DN114067_c0_g1_i1:68-697(+)	SRR1330_TRINITY_DN114067_c0_g1::SRR1330_TRINITY_DN114067_c0_g1_i1::g.225915::m.225915	IS_216438_Pdol9_C_band_Pann_DB	1	0.000178094	1	1	2	0.129187	24 kDa
SRR7914_TRINITY_DN31219_c1_g1::SRR7914_TRINITY_DN31219_c1_g1_i1::g.21176::m.21176 [type:complete len:527 gc:universal SRR7914_TRINITY_DN31219_c1_g1_i1:100-1680(+)]	type:complete len:527 gc:universal SRR7980_TRINITY_DN19131_c3_g1_i6:2204-624(-)	SRR7980_TRINITY_DN19131_c3_g1::SRR7980_TRINITY_DN19131_c3_g1_i6::g.84999::m.84999	IS_216438_Pdol9_C_band_Pann_DB	1	0.00115761	4	5	13	0.224335	57 kDa
SRR7979_TRINITY_DN27794_c0_g1::SRR7979_TRINITY_DN27794_c0_g1_i1::g.50134::m.50134 [type:internal len:206 gc:universal SRR7979_TRINITY_DN27794_c0_g1_i1:2-616(+)]	type:5prime_partial len:476 gc:universal SRR8000_TRINITY_DN23260_c0_g1_i1:2322-895(-)	SRR8000_TRINITY_DN23260_c0_g1::SRR8000_TRINITY_DN23260_c0_g1_i1::g.101100::m.101100	IS_216438_Pdol9_C_band_Pann_DB	1	0.00293856	0	0	33	0.345263	53 kDa
SRR7978_TRINITY_DN20090_c1_g1::SRR7978_TRINITY_DN20090_c1_g1_i12::g.31665::m.31665 [type:5prime_partial len:241 gc:universal SRR7978_TRINITY_DN20090_c1_g1_i12:763-41(-)]	type:5prime_partial len:241 gc:universal SRR7978_TRINITY_DN20090_c1_g1_i12:763-41(-)	SRR7978_TRINITY_DN20090_c1_g1::SRR7978_TRINITY_DN20090_c1_g1_i12::g.31665::m.31665	IS_216438_Pdol9_C_band_Pann_DB	1	0.00062333	2	3	7	0.154167	27 kDa
SRR1330_TRINITY_DN123871_c0_g5::SRR1330_TRINITY_DN123871_c0_g5_i2::g.209378::m.209378 [type:complete len:377 gc:universal SRR1330_TRINITY_DN123871_c0_g5_i2:1904-774(-)]	type:complete len:377 gc:universal SRR1330_TRINITY_DN123871_c0_g5_i2:1904-774(-)	SRR1330_TRINITY_DN123871_c0_g5::SRR1330_TRINITY_DN123871_c0_g5_i2::g.209378::m.209378	IS_216438_Pdol9_C_band_Pann_DB	1	0.0016919	0	0	19	0.382979	42 kDa
SRR8017_TRINITY_DN36970_c0_g1::SRR8017_TRINITY_DN36970_c0_g1_i1::g.116481::m.116481 [type:internal len:140 gc:universal SRR8017_TRINITY_DN36970_c0_g1_i1:3-419(+)]	type:internal len:156 gc:universal SRR8020_TRINITY_DN11352_c0_g1_i1:466-2(-)	SRR8020_TRINITY_DN11352_c0_g1::SRR8020_TRINITY_DN11352_c0_g1_i1::g.138053::m.138053	IS_216438_Pdol9_C_band_Pann_DB	1	0.000267142	1	1	3	0.303226	15 kDa
SRR8017_TRINITY_DN23862_c0_g1::SRR8017_TRINITY_DN23862_c0_g1_i2::g.110685::m.110685 [type:complete len:543 gc:universal SRR8017_TRINITY_DN23862_c0_g1_i2:378-2006(+)]	type:3prime_partial len:177 gc:universal SRR1330_TRINITY_DN321263_c0_g1_i1:116-643(+)	SRR1330_TRINITY_DN321263_c0_g1::SRR1330_TRINITY_DN321263_c0_g1_i1::g.258018::m.258018	IS_216438_Pdol9_C_band_Pann_DB	1	0.000267142	2	2	3	0.164773	19 kDa
SRR7914_TRINITY_DN27097_c0_g1::SRR7914_TRINITY_DN27097_c0_g1_i1::g.19267::m.19267 [type:complete len:481 gc:universal SRR7914_TRINITY_DN27097_c0_g1_i1:266-1708(+)]	type:complete len:481 gc:universal SRR7914_TRINITY_DN27097_c0_g1_i1:266-1708(+)	SRR7914_TRINITY_DN27097_c0_g1::SRR7914_TRINITY_DN27097_c0_g1_i1::g.19267::m.19267	IS_216438_Pdol9_C_band_Pann_DB	1	0.000445236	4	4	5	0.120833	53 kDa
SRR7914_TRINITY_DN28680_c0_g1::SRR7914_TRINITY_DN28680_c0_g1_i2::g.14784::m.14784 [type:internal len:501 gc:universal SRR7914_TRINITY_DN28680_c0_g1_i2:3-1502(+)]	type:5prime_partial len:462 gc:universal SRR7978_TRINITY_DN19127_c0_g1_i2:1-1386(+)	SRR7978_TRINITY_DN19127_c0_g1::SRR7978_TRINITY_DN19127_c0_g1_i2::g.37710::m.37710	IS_216438_Pdol9_C_band_Pann_DB	0.99	0.00997329	0	0	112	0.509761	50 kDa
SRR8021_TRINITY_DN19108_c0_g1::SRR8021_TRINITY_DN19108_c0_g1_i1::g.158603::m.158603 [type:complete len:458 gc:universal SRR8021_TRINITY_DN19108_c0_g1_i1:1966-593(-)]	type:5prime_partial len:347 gc:universal SRR7914_TRINITY_DN25132_c0_g1_i1:2-1042(+)	SRR7914_TRINITY_DN25132_c0_g1::SRR7914_TRINITY_DN25132_c0_g1_i1::g.9181::m.9181	IS_216438_Pdol9_C_band_Pann_DB	1	0.000445236	1	1	5	0.0722543	39 kDa
SRR7914_TRINITY_DN31354_c2_g8::SRR7914_TRINITY_DN31354_c2_g8_i1::g.5551::m.5551 [type:complete len:452 gc:universal SRR7914_TRINITY_DN31354_c2_g8_i1:1577-222(-)]	type:complete len:452 gc:universal SRR7980_TRINITY_DN18831_c0_g2_i1:487-1842(+)	SRR7980_TRINITY_DN18831_c0_g2::SRR7980_TRINITY_DN18831_c0_g2_i1::g.81046::m.81046	IS_216438_Pdol9_C_band_Pann_DB	1	0.00062333	1	1	7	0.166297	50 kDa
SRR7979_TRINITY_DN18638_c0_g5::SRR7979_TRINITY_DN18638_c0_g5_i1::g.53917::m.53917 [type:complete len:449 gc:universal SRR7979_TRINITY_DN18638_c0_g5_i1:330-1676(+)]	type:complete len:414 gc:universal SRR7978_TRINITY_DN19020_c4_g2_i1:1378-137(-)	SRR7978_TRINITY_DN19020_c4_g2::SRR7978_TRINITY_DN19020_c4_g2_i1::g.25386::m.25386	IS_216438_Pdol9_C_band_Pann_DB	1	0.000445236	1	1	5	0.159806	46 kDa
SRR7978_TRINITY_DN18777_c0_g1::SRR7978_TRINITY_DN18777_c0_g1_i3::g.32830::m.32830 [type:complete len:532 gc:universal SRR7978_TRINITY_DN18777_c0_g1_i3:210-1805(+)]	type:complete len:532 gc:universal SRR7978_TRINITY_DN18777_c0_g1_i3:210-1805(+)	SRR7978_TRINITY_DN18777_c0_g1::SRR7978_TRINITY_DN18777_c0_g1_i3::g.32830::m.32830	IS_216438_Pdol9_C_band_Pann_DB	1	0.000534283	1	1	6	0.131827	60 kDa
SRR8017_TRINITY_DN26105_c2_g1::SRR8017_TRINITY_DN26105_c2_g1_i1::g.121043::m.121043 [type:complete len:454 gc:universal SRR8017_TRINITY_DN26105_c2_g1_i1:104-1465(+)]	type:complete len:454 gc:universal SRR8017_TRINITY_DN26105_c2_g1_i1:104-1465(+)	SRR8017_TRINITY_DN26105_c2_g1::SRR8017_TRINITY_DN26105_c2_g1_i1::g.121043::m.121043	IS_216438_Pdol9_C_band_Pann_DB	0.99	0.000534283	2	2	6	0.0551876	52 kDa
SRR7979_TRINITY_DN27794_c0_g1::SRR7979_TRINITY_DN27794_c0_g1_i1::g.50134::m.50134 [type:internal len:206 gc:universal SRR7979_TRINITY_DN27794_c0_g1_i1:2-616(+)]	type:3prime_partial len:216 gc:universal SRR7914_TRINITY_DN17348_c0_g1_i1:647-3(-)	SRR7914_TRINITY_DN17348_c0_g1::SRR7914_TRINITY_DN17348_c0_g1_i1::g.21467::m.21467	IS_216438_Pdol9_C_band_Pann_DB	1	0.00133571	2	2	15	0.162791	24 kDa
sp|ALBU_BOVIN| [sp|ALBU_BOVIN|]	sp|ALBU_BOVIN|	sp|ALBU_BOVIN|	IS_216438_Pdol9_C_lane_Pann_DB	1	0.0443917	64	122	1272	0.823723	69 kDa
SRR7978_TRINITY_DN19380_c1_g1::SRR7978_TRINITY_DN19380_c1_g1_i3::g.40942::m.40942 [type:complete len:104 gc:universal SRR7978_TRINITY_DN19380_c1_g1_i3:156-467(+)]	type:5prime_partial len:128 gc:universal SRR1329_TRINITY_DN353425_c12_g2_i10:543-160(-)	SRR1329_TRINITY_DN353425_c12_g2::SRR1329_TRINITY_DN353425_c12_g2_i10::g.167703::m.167703	IS_216438_Pdol9_C_lane_Pann_DB	1	0.00139597	9	14	40	0.433071	14 kDa
SRR7978_TRINITY_DN14411_c1_g1::SRR7978_TRINITY_DN14411_c1_g1_i2::g.31295::m.31295 [type:5prime_partial len:252 gc:universal SRR7978_TRINITY_DN14411_c1_g1_i2:1674-919(-)]	type:5prime_partial len:252 gc:universal SRR7978_TRINITY_DN14411_c1_g1_i2:1674-919(-)	SRR7978_TRINITY_DN14411_c1_g1::SRR7978_TRINITY_DN14411_c1_g1_i2::g.31295::m.31295	IS_216438_Pdol9_C_lane_Pann_DB	1	0.00589795	25	43	169	0.876494	28 kDa
sp|K2C1_HUMAN| [sp|K2C1_HUMAN|]	sp|K2C1_HUMAN|	sp|K2C1_HUMAN|	IS_216438_Pdol9_C_lane_Pann_DB	1	0.00265233	23	28	76	0.413686	66 kDa
sp|K1C9_HUMAN| [sp|K1C9_HUMAN|]	sp|K1C9_HUMAN|	sp|K1C9_HUMAN|	IS_216438_Pdol9_C_lane_Pann_DB	1	0.00265233	20	32	76	0.444623	62 kDa
sp|K1C10_HUMAN| [sp|K1C10_HUMAN|]	sp|K1C10_HUMAN|	sp|K1C10_HUMAN|	IS_216438_Pdol9_C_lane_Pann_DB	1	0.00205905	17	20	59	0.387858	60 kDa
SRR7978_TRINITY_DN14411_c1_g3::SRR7978_TRINITY_DN14411_c1_g3_i1::g.31296::m.31296 [type:internal len:171 gc:universal SRR7978_TRINITY_DN14411_c1_g3_i1:3-512(+)]	type:internal len:171 gc:universal SRR7978_TRINITY_DN14411_c1_g3_i1:3-512(+)	SRR7978_TRINITY_DN14411_c1_g3::SRR7978_TRINITY_DN14411_c1_g3_i1::g.31296::m.31296	IS_216438_Pdol9_C_lane_Pann_DB	1	0.0040832	18	34	117	0.817647	19 kDa
sp|K22E_HUMAN| [sp|K22E_HUMAN|]	sp|K22E_HUMAN|	sp|K22E_HUMAN|	IS_216438_Pdol9_C_lane_Pann_DB	1	0.00153556	19	22	44	0.494574	66 kDa
sp|TRYP_PIG| [sp|TRYP_PIG|]	sp|TRYP_PIG|	sp|TRYP_PIG|	IS_216438_Pdol9_C_lane_Pann_DB	1	0.00146576	2	2	42	0.0779221	24 kDa
SRR1330_TRINITY_DN122443_c0_g1::SRR1330_TRINITY_DN122443_c0_g1_i1::g.219674::m.219674 [type:complete len:1459 gc:universal SRR1330_TRINITY_DN122443_c0_g1_i1:5963-1587(-)]	type:complete len:1459 gc:universal SRR1330_TRINITY_DN122443_c0_g1_i1:5963-1587(-)	SRR1330_TRINITY_DN122443_c0_g1::SRR1330_TRINITY_DN122443_c0_g1_i1::g.219674::m.219674	IS_216438_Pdol9_C_lane_Pann_DB	1	0.00202415	40	43	58	0.359396	162 kDa
SRR7979_TRINITY_DN18586_c1_g3::SRR7979_TRINITY_DN18586_c1_g3_i2::g.60317::m.60317 [type:complete len:684 gc:universal SRR7979_TRINITY_DN18586_c1_g3_i2:321-2372(+)]	type:complete len:706 gc:universal SRR1330_TRINITY_DN122622_c11_g1_i10:2271-154(-)	SRR1330_TRINITY_DN122622_c11_g1::SRR1330_TRINITY_DN122622_c11_g1_i10::g.217406::m.217406	IS_216438_Pdol9_C_lane_Pann_DB	1	0.00373421	36	49	107	0.643972	79 kDa
SRR1330_TRINITY_DN124479_c0_g1::SRR1330_TRINITY_DN124479_c0_g1_i6::g.230241::m.230241 [type:complete len:686 gc:universal SRR1330_TRINITY_DN124479_c0_g1_i6:2245-188(-)]	type:complete len:686 gc:universal SRR1330_TRINITY_DN124479_c0_g1_i6:2245-188(-)	SRR1330_TRINITY_DN124479_c0_g1::SRR1330_TRINITY_DN124479_c0_g1_i6::g.230241::m.230241	IS_216438_Pdol9_C_lane_Pann_DB	1	0.00233824	23	31	67	0.343066	77 kDa
SRR7914_TRINITY_DN29934_c0_g1::SRR7914_TRINITY_DN29934_c0_g1_i7::g.10782::m.10782 [type:complete len:335 gc:universal SRR7914_TRINITY_DN29934_c0_g1_i7:266-1270(+)]	type:complete len:335 gc:universal SRR7914_TRINITY_DN29934_c0_g1_i7:266-1270(+)	SRR7914_TRINITY_DN29934_c0_g1::SRR7914_TRINITY_DN29934_c0_g1_i7::g.10782::m.10782	IS_216438_Pdol9_C_lane_Pann_DB	1	0.00136107	10	20	39	0.508982	36 kDa
SRR7914_TRINITY_DN29932_c6_g3::SRR7914_TRINITY_DN29932_c6_g3_i1::g.10467::m.10467 [type:3prime_partial len:303 gc:universal SRR7914_TRINITY_DN29932_c6_g3_i1:462-1367(+)]	type:complete len:436 gc:universal SRR8000_TRINITY_DN20528_c0_g1_i1:264-1571(+)	SRR8000_TRINITY_DN20528_c0_g1::SRR8000_TRINITY_DN20528_c0_g1_i1::g.99850::m.99850	IS_216438_Pdol9_C_lane_Pann_DB	1	0.00191945	17	30	55	0.521839	47 kDa
SRR8017_TRINITY_DN25002_c7_g2::SRR8017_TRINITY_DN25002_c7_g2_i7::g.121404::m.121404 [type:complete len:857 gc:universal SRR8017_TRINITY_DN25002_c7_g2_i7:5780-3210(-)]	type:complete len:857 gc:universal SRR8017_TRINITY_DN25002_c7_g2_i7:5780-3210(-)	SRR8017_TRINITY_DN25002_c7_g2::SRR8017_TRINITY_DN25002_c7_g2_i7::g.121404::m.121404	IS_216438_Pdol9_C_lane_Pann_DB	1	0.00230334	26	42	66	0.438084	96 kDa
SRR7978_TRINITY_DN19466_c0_g1::SRR7978_TRINITY_DN19466_c0_g1_i1::g.44911::m.44911 [type:5prime_partial len:158 gc:universal SRR7978_TRINITY_DN19466_c0_g1_i1:1-474(+)]	type:5prime_partial len:158 gc:universal SRR7978_TRINITY_DN19466_c0_g1_i1:1-474(+)	SRR7978_TRINITY_DN19466_c0_g1::SRR7978_TRINITY_DN19466_c0_g1_i1::g.44911::m.44911	IS_216438_Pdol9_C_lane_Pann_DB	1	0.00160536	11	17	46	0.789809	17 kDa
SRR1330_TRINITY_DN110493_c0_g1::SRR1330_TRINITY_DN110493_c0_g1_i2::g.250426::m.250426 [type:complete len:339 gc:universal SRR1330_TRINITY_DN110493_c0_g1_i2:92-1108(+)]	type:complete len:339 gc:universal SRR1330_TRINITY_DN110493_c0_g1_i2:92-1108(+)	SRR1330_TRINITY_DN110493_c0_g1::SRR1330_TRINITY_DN110493_c0_g1_i2::g.250426::m.250426	IS_216438_Pdol9_C_lane_Pann_DB	1	0.00275703	22	32	79	0.653846	38 kDa
SRR1330_TRINITY_DN116543_c0_g1::SRR1330_TRINITY_DN116543_c0_g1_i2::g.206660::m.206660 [type:5prime_partial len:349 gc:universal SRR1330_TRINITY_DN116543_c0_g1_i2:1969-923(-)]	type:5prime_partial len:349 gc:universal SRR1330_TRINITY_DN116543_c0_g1_i2:1969-923(-)	SRR1330_TRINITY_DN116543_c0_g1::SRR1330_TRINITY_DN116543_c0_g1_i2::g.206660::m.206660	IS_216438_Pdol9_C_lane_Pann_DB	1	0.00237314	16	28	68	0.586207	39 kDa
SRR1330_TRINITY_DN119139_c0_g1::SRR1330_TRINITY_DN119139_c0_g1_i13::g.245446::m.245446 [type:5prime_partial len:483 gc:universal SRR1330_TRINITY_DN119139_c0_g1_i13:3-1451(+)]	type:5prime_partial len:483 gc:universal SRR1330_TRINITY_DN119139_c0_g1_i13:3-1451(+)	SRR1330_TRINITY_DN119139_c0_g1::SRR1330_TRINITY_DN119139_c0_g1_i13::g.245446::m.245446	IS_216438_Pdol9_C_lane_Pann_DB	1	0.00219865	15	22	63	0.43361	54 kDa
SRR7978_TRINITY_DN11304_c0_g1::SRR7978_TRINITY_DN11304_c0_g1_i2::g.33775::m.33775 [type:internal len:215 gc:universal SRR7978_TRINITY_DN11304_c0_g1_i2:1-642(+)]	type:internal len:215 gc:universal SRR7978_TRINITY_DN11304_c0_g1_i2:1-642(+)	SRR7978_TRINITY_DN11304_c0_g1::SRR7978_TRINITY_DN11304_c0_g1_i2::g.33775::m.33775	IS_216438_Pdol9_C_lane_Pann_DB	1	0.00286173	9	19	82	0.439252	23 kDa
SRR7978_TRINITY_DN19183_c1_g1::SRR7978_TRINITY_DN19183_c1_g1_i1::g.37650::m.37650 [type:complete len:154 gc:universal SRR7978_TRINITY_DN19183_c1_g1_i1:320-781(+)]	type:complete len:154 gc:universal SRR7978_TRINITY_DN19183_c1_g1_i1:320-781(+)	SRR7978_TRINITY_DN19183_c1_g1::SRR7978_TRINITY_DN19183_c1_g1_i1::g.37650::m.37650	IS_216438_Pdol9_C_lane_Pann_DB	1	0.00195435	7	16	56	0.653595	17 kDa
SRR7979_TRINITY_DN17616_c0_g6::SRR7979_TRINITY_DN17616_c0_g6_i6::g.64668::m.64668 [type:complete len:658 gc:universal SRR7979_TRINITY_DN17616_c0_g6_i6:2570-4543(+)]	type:complete len:658 gc:universal SRR7979_TRINITY_DN17616_c0_g6_i6:2570-4543(+)	SRR7979_TRINITY_DN17616_c0_g6::SRR7979_TRINITY_DN17616_c0_g6_i6::g.64668::m.64668	IS_216438_Pdol9_C_lane_Pann_DB	1	0.00160536	17	24	46	0.374429	73 kDa
SRR1330_TRINITY_DN114860_c0_g1::SRR1330_TRINITY_DN114860_c0_g1_i3::g.229783::m.229783 [type:complete len:121 gc:universal SRR1330_TRINITY_DN114860_c0_g1_i3:63-425(+)]	type:complete len:121 gc:universal SRR1330_TRINITY_DN114860_c0_g1_i3:63-425(+)	SRR1330_TRINITY_DN114860_c0_g1::SRR1330_TRINITY_DN114860_c0_g1_i3::g.229783::m.229783	IS_216438_Pdol9_C_lane_Pann_DB	1	0.00125637	5	8	36	0.516667	14 kDa
SRR7978_TRINITY_DN19380_c0_g1::SRR7978_TRINITY_DN19380_c0_g1_i4::g.40935::m.40935 [type:5prime_partial len:128 gc:universal SRR7978_TRINITY_DN19380_c0_g1_i4:1-384(+)]	type:5prime_partial len:153 gc:universal SRR7980_TRINITY_DN18366_c7_g1_i4:1-459(+)	SRR7980_TRINITY_DN18366_c7_g1::SRR7980_TRINITY_DN18366_c7_g1_i4::g.72275::m.72275	IS_216438_Pdol9_C_lane_Pann_DB	1	0.00146576	1	4	42	0.381579	17 kDa
SRR7980_TRINITY_DN18145_c1_g1::SRR7980_TRINITY_DN18145_c1_g1_i5::g.75541::m.75541 [type:complete len:507 gc:universal SRR7980_TRINITY_DN18145_c1_g1_i5:275-1795(+)]	type:complete len:507 gc:universal SRR1330_TRINITY_DN117089_c0_g1_i6:139-1659(+)	SRR1330_TRINITY_DN117089_c0_g1::SRR1330_TRINITY_DN117089_c0_g1_i6::g.225077::m.225077	IS_216438_Pdol9_C_lane_Pann_DB	1	0.000558386	13	14	16	0.335968	57 kDa
SRR7914_TRINITY_DN28680_c0_g1::SRR7914_TRINITY_DN28680_c0_g1_i1::g.14783::m.14783 [type:internal len:271 gc:universal SRR7914_TRINITY_DN28680_c0_g1_i1:3-812(+)]	type:internal len:501 gc:universal SRR7914_TRINITY_DN28680_c0_g1_i2:3-1502(+)	SRR7914_TRINITY_DN28680_c0_g1::SRR7914_TRINITY_DN28680_c0_g1_i2::g.14784::m.14784	IS_216438_Pdol9_C_lane_Pann_DB	1	0.0109234	8	11	313	0.604	53 kDa
SRR7914_TRINITY_DN28680_c0_g1::SRR7914_TRINITY_DN28680_c0_g1_i1::g.14783::m.14783 [type:internal len:271 gc:universal SRR7914_TRINITY_DN28680_c0_g1_i1:3-812(+)]	type:complete len:350 gc:universal SRR7980_TRINITY_DN19221_c2_g4_i1:175-1224(+)	SRR7980_TRINITY_DN19221_c2_g4::SRR7980_TRINITY_DN19221_c2_g4_i1::g.76688::m.76688	IS_216438_Pdol9_C_lane_Pann_DB	1	0.00938787	4	5	269	0.713467	38 kDa
SRR8020_TRINITY_DN29716_c2_g2::SRR8020_TRINITY_DN29716_c2_g2_i1::g.132635::m.132635 [type:complete len:152 gc:universal SRR8020_TRINITY_DN29716_c2_g2_i1:848-393(-)]	type:5prime_partial len:178 gc:universal SRR8000_TRINITY_DN21703_c8_g3_i2:3-536(+)	SRR8000_TRINITY_DN21703_c8_g3::SRR8000_TRINITY_DN21703_c8_g3_i2::g.94394::m.94394	IS_216438_Pdol9_C_lane_Pann_DB	1	0.000558386	6	8	16	0.40113	20 kDa
SRR8017_TRINITY_DN74840_c0_g1::SRR8017_TRINITY_DN74840_c0_g1_i1::g.116240::m.116240 [type:3prime_partial len:117 gc:universal SRR8017_TRINITY_DN74840_c0_g1_i1:349-2(-)]	type:3prime_partial len:117 gc:universal SRR8017_TRINITY_DN74840_c0_g1_i1:349-2(-)	SRR8017_TRINITY_DN74840_c0_g1::SRR8017_TRINITY_DN74840_c0_g1_i1::g.116240::m.116240	IS_216438_Pdol9_C_lane_Pann_DB	1	0.00153556	7	16	44	0.525862	13 kDa
SRR7978_TRINITY_DN11440_c0_g1::SRR7978_TRINITY_DN11440_c0_g1_i1::g.32770::m.32770 [type:complete len:338 gc:universal SRR7978_TRINITY_DN11440_c0_g1_i1:669-1682(+)]	type:complete len:338 gc:universal SRR7978_TRINITY_DN11440_c0_g1_i1:669-1682(+)	SRR7978_TRINITY_DN11440_c0_g1::SRR7978_TRINITY_DN11440_c0_g1_i1::g.32770::m.32770	IS_216438_Pdol9_C_lane_Pann_DB	1	0.00153556	20	27	44	0.605341	38 kDa
SRR1330_TRINITY_DN118385_c7_g1::SRR1330_TRINITY_DN118385_c7_g1_i1::g.244778::m.244778 [type:internal len:914 gc:universal SRR1330_TRINITY_DN118385_c7_g1_i1:1-2739(+)]	type:internal len:914 gc:universal SRR1330_TRINITY_DN118385_c7_g1_i1:1-2739(+)	SRR1330_TRINITY_DN118385_c7_g1::SRR1330_TRINITY_DN118385_c7_g1_i1::g.244778::m.244778	IS_216438_Pdol9_C_lane_Pann_DB	1	0.00181476	24	33	52	0.353779	101 kDa
SRR7978_TRINITY_DN18255_c6_g2::SRR7978_TRINITY_DN18255_c6_g2_i1::g.38397::m.38397 [type:complete len:498 gc:universal SRR7978_TRINITY_DN18255_c6_g2_i1:1796-303(-)]	type:complete len:498 gc:universal SRR7978_TRINITY_DN18255_c6_g2_i1:1796-303(-)	SRR7978_TRINITY_DN18255_c6_g2::SRR7978_TRINITY_DN18255_c6_g2_i1::g.38397::m.38397	IS_216438_Pdol9_C_lane_Pann_DB	1	0.00129127	15	20	37	0.426559	56 kDa
SRR7980_TRINITY_DN18156_c4_g2::SRR7980_TRINITY_DN18156_c4_g2_i1::g.75303::m.75303 [type:complete len:1767 gc:universal SRR7980_TRINITY_DN18156_c4_g2_i1:208-5508(+)]	type:complete len:1767 gc:universal SRR7980_TRINITY_DN18156_c4_g2_i1:208-5508(+)	SRR7980_TRINITY_DN18156_c4_g2::SRR7980_TRINITY_DN18156_c4_g2_i1::g.75303::m.75303	IS_216438_Pdol9_C_lane_Pann_DB	1	0.00216375	41	45	62	0.295017	208 kDa
SRR7914_TRINITY_DN29665_c3_g6::SRR7914_TRINITY_DN29665_c3_g6_i1::g.7308::m.7308 [type:complete len:365 gc:universal SRR7914_TRINITY_DN29665_c3_g6_i1:350-1444(+)]	type:complete len:365 gc:universal SRR7914_TRINITY_DN29665_c3_g6_i1:350-1444(+)	SRR7914_TRINITY_DN29665_c3_g6::SRR7914_TRINITY_DN29665_c3_g6_i1::g.7308::m.7308	IS_216438_Pdol9_C_lane_Pann_DB	1	0.00111677	18	24	32	0.637363	40 kDa
SRR7914_TRINITY_DN32362_c3_g4::SRR7914_TRINITY_DN32362_c3_g4_i2::g.2808::m.2808 [type:complete len:556 gc:universal SRR7914_TRINITY_DN32362_c3_g4_i2:342-2009(+)]	type:complete len:556 gc:universal SRR7914_TRINITY_DN32362_c3_g4_i2:342-2009(+)	SRR7914_TRINITY_DN32362_c3_g4::SRR7914_TRINITY_DN32362_c3_g4_i2::g.2808::m.2808	IS_216438_Pdol9_C_lane_Pann_DB	1	0.000488588	7	10	14	0.201802	62 kDa
SRR8000_TRINITY_DN21637_c2_g3::SRR8000_TRINITY_DN21637_c2_g3_i3::g.100440::m.100440 [type:complete len:615 gc:universal SRR8000_TRINITY_DN21637_c2_g3_i3:3262-1418(-)]	type:complete len:615 gc:universal SRR8000_TRINITY_DN21637_c2_g3_i3:3262-1418(-)	SRR8000_TRINITY_DN21637_c2_g3::SRR8000_TRINITY_DN21637_c2_g3_i3::g.100440::m.100440	IS_216438_Pdol9_C_lane_Pann_DB	1	0.00153556	20	27	44	0.464169	69 kDa
SRR7978_TRINITY_DN14411_c0_g1::SRR7978_TRINITY_DN14411_c0_g1_i1::g.31294::m.31294 [type:3prime_partial len:100 gc:universal SRR7978_TRINITY_DN14411_c0_g1_i1:297-1(-)]	type:3prime_partial len:100 gc:universal SRR7978_TRINITY_DN14411_c0_g1_i1:297-1(-)	SRR7978_TRINITY_DN14411_c0_g1::SRR7978_TRINITY_DN14411_c0_g1_i1::g.31294::m.31294	IS_216438_Pdol9_C_lane_Pann_DB	1	0.00111677	8	16	32	0.515151	11 kDa
SRR1330_TRINITY_DN124323_c1_g1::SRR1330_TRINITY_DN124323_c1_g1_i1::g.210647::m.210647 [type:5prime_partial len:348 gc:universal SRR1330_TRINITY_DN124323_c1_g1_i1:1288-245(-)]	type:5prime_partial len:348 gc:universal SRR1330_TRINITY_DN124323_c1_g1_i1:1288-245(-)	SRR1330_TRINITY_DN124323_c1_g1::SRR1330_TRINITY_DN124323_c1_g1_i1::g.210647::m.210647	IS_216438_Pdol9_C_lane_Pann_DB	1	0.00136107	16	22	39	0.576369	40 kDa
SRR7979_TRINITY_DN18040_c0_g2::SRR7979_TRINITY_DN18040_c0_g2_i1::g.68282::m.68282 [type:complete len:2639 gc:universal SRR7979_TRINITY_DN18040_c0_g2_i1:9513-1597(-)]	type:complete len:2639 gc:universal SRR7979_TRINITY_DN18040_c0_g2_i1:9513-1597(-)	SRR7979_TRINITY_DN18040_c0_g2::SRR7979_TRINITY_DN18040_c0_g2_i1::g.68282::m.68282	IS_216438_Pdol9_C_lane_Pann_DB	1	0.00181476	39	42	52	0.227066	281 kDa
SRR7979_TRINITY_DN16842_c3_g1::SRR7979_TRINITY_DN16842_c3_g1_i2::g.56019::m.56019 [type:complete len:165 gc:universal SRR7979_TRINITY_DN16842_c3_g1_i2:1297-1791(+)]	type:5prime_partial len:167 gc:universal SRR1329_TRINITY_DN355037_c7_g2_i11:704-204(-)	SRR1329_TRINITY_DN355037_c7_g2::SRR1329_TRINITY_DN355037_c7_g2_i11::g.184116::m.184116	IS_216438_Pdol9_C_lane_Pann_DB	1	0.00108187	10	17	31	0.608434	19 kDa
SRR8017_TRINITY_DN6677_c0_g1::SRR8017_TRINITY_DN6677_c0_g1_i1::g.113437::m.113437 [type:complete len:106 gc:universal SRR8017_TRINITY_DN6677_c0_g1_i1:371-688(+)]	type:complete len:106 gc:universal SRR8017_TRINITY_DN6677_c0_g1_i1:371-688(+)	SRR8017_TRINITY_DN6677_c0_g1::SRR8017_TRINITY_DN6677_c0_g1_i1::g.113437::m.113437	IS_216438_Pdol9_C_lane_Pann_DB	1	0.000907378	8	13	26	0.72381	12 kDa
SRR7914_TRINITY_DN49741_c0_g1::SRR7914_TRINITY_DN49741_c0_g1_i1::g.19143::m.19143 [type:3prime_partial len:457 gc:universal SRR7914_TRINITY_DN49741_c0_g1_i1:1368-1(-)]	type:complete len:699 gc:universal SRR7980_TRINITY_DN18546_c2_g1_i11:281-2377(+)	SRR7980_TRINITY_DN18546_c2_g1::SRR7980_TRINITY_DN18546_c2_g1_i11::g.84759::m.84759	IS_216438_Pdol9_C_lane_Pann_DB	1	0.00129127	19	21	37	0.395415	78 kDa
SRR7978_TRINITY_DN39042_c0_g1::SRR7978_TRINITY_DN39042_c0_g1_i1::g.39245::m.39245 [type:internal len:116 gc:universal SRR7978_TRINITY_DN39042_c0_g1_i1:1-345(+)]	type:internal len:116 gc:universal SRR7978_TRINITY_DN39042_c0_g1_i1:1-345(+)	SRR7978_TRINITY_DN39042_c0_g1::SRR7978_TRINITY_DN39042_c0_g1_i1::g.39245::m.39245	IS_216438_Pdol9_C_lane_Pann_DB	1	0.00129127	3	5	37	0.486957	12 kDa
SRR1330_TRINITY_DN120245_c11_g3::SRR1330_TRINITY_DN120245_c11_g3_i1::g.211565::m.211565 [type:complete len:574 gc:universal SRR1330_TRINITY_DN120245_c11_g3_i1:2111-390(-)]	type:complete len:574 gc:universal SRR1330_TRINITY_DN120245_c11_g3_i1:2111-390(-)	SRR1330_TRINITY_DN120245_c11_g3::SRR1330_TRINITY_DN120245_c11_g3_i1::g.211565::m.211565	IS_216438_Pdol9_C_lane_Pann_DB	1	0.000872479	15	17	25	0.373473	61 kDa
SRR1330_TRINITY_DN119754_c11_g1::SRR1330_TRINITY_DN119754_c11_g1_i3::g.227809::m.227809 [type:3prime_partial len:1298 gc:universal SRR1330_TRINITY_DN119754_c11_g1_i3:202-4092(+)]	type:3prime_partial len:1298 gc:universal SRR1330_TRINITY_DN119754_c11_g1_i3:202-4092(+)	SRR1330_TRINITY_DN119754_c11_g1::SRR1330_TRINITY_DN119754_c11_g1_i3::g.227809::m.227809	IS_216438_Pdol9_C_lane_Pann_DB	1	0.00153556	27	31	44	0.269083	151 kDa
SRR7978_TRINITY_DN17452_c0_g6::SRR7978_TRINITY_DN17452_c0_g6_i2::g.35083::m.35083 [type:complete len:127 gc:universal SRR7978_TRINITY_DN17452_c0_g6_i2:809-429(-)]	type:5prime_partial len:859 gc:universal SRR7979_TRINITY_DN16795_c0_g1_i1:2998-422(-)	SRR7979_TRINITY_DN16795_c0_g1::SRR7979_TRINITY_DN16795_c0_g1_i1::g.47091::m.47091	IS_216438_Pdol9_C_lane_Pann_DB	1	0.00157046	19	25	45	0.265734	94 kDa
SRR7979_TRINITY_DN17321_c5_g1::SRR7979_TRINITY_DN17321_c5_g1_i2::g.66870::m.66870 [type:complete len:931 gc:universal SRR7979_TRINITY_DN17321_c5_g1_i2:182-2974(+)]	type:complete len:931 gc:universal SRR7979_TRINITY_DN17321_c5_g1_i2:182-2974(+)	SRR7979_TRINITY_DN17321_c5_g1::SRR7979_TRINITY_DN17321_c5_g1_i2::g.66870::m.66870	IS_216438_Pdol9_C_lane_Pann_DB	1	0.00157046	24	34	45	0.34086	106 kDa
SRR8017_TRINITY_DN23749_c0_g1::SRR8017_TRINITY_DN23749_c0_g1_i1::g.111860::m.111860 [type:complete len:163 gc:universal SRR8017_TRINITY_DN23749_c0_g1_i1:1444-956(-)]	type:complete len:163 gc:universal SRR8017_TRINITY_DN23749_c0_g1_i1:1444-956(-)	SRR8017_TRINITY_DN23749_c0_g1::SRR8017_TRINITY_DN23749_c0_g1_i1::g.111860::m.111860	IS_216438_Pdol9_C_lane_Pann_DB	1	0.000663084	10	13	19	0.703704	17 kDa
SRR1330_TRINITY_DN124323_c2_g2::SRR1330_TRINITY_DN124323_c2_g2_i3::g.210651::m.210651 [type:5prime_partial len:486 gc:universal SRR1330_TRINITY_DN124323_c2_g2_i3:3-1460(+)]	type:internal len:107 gc:universal SRR1330_TRINITY_DN124323_c2_g3_i2:318-1(-)	SRR1330_TRINITY_DN124323_c2_g3::SRR1330_TRINITY_DN124323_c2_g3_i2::g.210659::m.210659	IS_216438_Pdol9_C_lane_Pann_DB	1	0.00080268	7	13	23	0.877359	12 kDa
SRR8017_TRINITY_DN26574_c4_g4::SRR8017_TRINITY_DN26574_c4_g4_i2::g.116904::m.116904 [type:complete len:455 gc:universal SRR8017_TRINITY_DN26574_c4_g4_i2:766-2130(+)]	type:complete len:455 gc:universal SRR8017_TRINITY_DN26574_c4_g4_i2:766-2130(+)	SRR8017_TRINITY_DN26574_c4_g4::SRR8017_TRINITY_DN26574_c4_g4_i2::g.116904::m.116904	IS_216438_Pdol9_C_lane_Pann_DB	1	0.000663084	13	15	19	0.359031	51 kDa
SRR1330_TRINITY_DN103436_c0_g1::SRR1330_TRINITY_DN103436_c0_g1_i1::g.224133::m.224133 [type:complete len:322 gc:universal SRR1330_TRINITY_DN103436_c0_g1_i1:291-1256(+)]	type:complete len:322 gc:universal SRR1330_TRINITY_DN103436_c0_g1_i1:291-1256(+)	SRR1330_TRINITY_DN103436_c0_g1::SRR1330_TRINITY_DN103436_c0_g1_i1::g.224133::m.224133	IS_216438_Pdol9_C_lane_Pann_DB	1	0.000977176	14	19	28	0.545171	36 kDa
SRR1330_TRINITY_DN157030_c0_g1::SRR1330_TRINITY_DN157030_c0_g1_i1::g.221227::m.221227 [type:3prime_partial len:599 gc:universal SRR1330_TRINITY_DN157030_c0_g1_i1:138-1931(+)]	type:3prime_partial len:599 gc:universal SRR1330_TRINITY_DN157030_c0_g1_i1:138-1931(+)	SRR1330_TRINITY_DN157030_c0_g1::SRR1330_TRINITY_DN157030_c0_g1_i1::g.221227::m.221227	IS_216438_Pdol9_C_lane_Pann_DB	1	0.00125637	16	19	36	0.411371	64 kDa
SRR1330_TRINITY_DN105931_c0_g1::SRR1330_TRINITY_DN105931_c0_g1_i1::g.231800::m.231800 [type:5prime_partial len:379 gc:universal SRR1330_TRINITY_DN105931_c0_g1_i1:1-1137(+)]	type:5prime_partial len:379 gc:universal SRR1330_TRINITY_DN105931_c0_g1_i1:1-1137(+)	SRR1330_TRINITY_DN105931_c0_g1::SRR1330_TRINITY_DN105931_c0_g1_i1::g.231800::m.231800	IS_216438_Pdol9_C_lane_Pann_DB	1	0.000837579	13	15	24	0.39418	43 kDa
SRR8020_TRINITY_DN28917_c0_g1::SRR8020_TRINITY_DN28917_c0_g1_i2::g.147803::m.147803 [type:complete len:903 gc:universal SRR8020_TRINITY_DN28917_c0_g1_i2:351-3059(+)]	type:complete len:903 gc:universal SRR8020_TRINITY_DN28917_c0_g1_i2:351-3059(+)	SRR8020_TRINITY_DN28917_c0_g1::SRR8020_TRINITY_DN28917_c0_g1_i2::g.147803::m.147803	IS_216438_Pdol9_C_lane_Pann_DB	1	0.00188455	25	29	54	0.511086	104 kDa
SRR8020_TRINITY_DN80519_c0_g1::SRR8020_TRINITY_DN80519_c0_g1_i1::g.130757::m.130757 [type:3prime_partial len:155 gc:universal SRR8020_TRINITY_DN80519_c0_g1_i1:211-672(+)]	type:3prime_partial len:155 gc:universal SRR8020_TRINITY_DN80519_c0_g1_i1:211-672(+)	SRR8020_TRINITY_DN80519_c0_g1::SRR8020_TRINITY_DN80519_c0_g1_i1::g.130757::m.130757	IS_216438_Pdol9_C_lane_Pann_DB	1	0.000942277	6	11	27	0.675325	17 kDa
[truncated: 552 more rows]

## Sheet: Peptide Table Report_454
Sequence Coverage	Protein	Accession	Bio Sample	Probability	% of total Spectrum	Unique Peptide Counts	Unique Spectrum Counts	Total Spectrum Counts	% of amino acids identified	m.w.
sp|ALBU_BOVIN| [sp|ALBU_BOVIN|]	sp|ALBU_BOVIN|	sp|ALBU_BOVIN|	IS_216438_Pdol9_C_Lane	1	0.0331879	57	102	951	0.75453	69 kDa
[truncated: 505 more rows]
